# Supplementary material for: Mass Spectrometry–Based Proteomics Reveals Potential Roles of NEK9 and MAP2K4 in Resistance to PI3K Inhibition in Triple-Negative Breast Cancers
Source: Oxford University Press journal article supplement (doi:10.1158/0008-5472.can-17-1990), 2018-02-22
Supplement: 00085472can171990-sup-185829_2_supp_4543816_p3hqnf.xlsx [file 00085472can171990-sup-185829_2_supp_4543816_p3hqnf.xlsx]

## Sheet: INFO
This file pertains to the 2018 study: Mundt et al.,Potential roles of NEK9 and MAP2K4 in resistance to PI3K inhibition in triple negative breast cancer revealed by mass spectrometry-based proteomics
W = WHIM
2h = 2 hours treatment
50h = 50 hours treatment
D1 = one dose
D3 = three doses
B = buparlisib
WO = washout
Column Header (SpliceIsoforms sheet)	Items specific to the Splice Isoform Table
id	ex: NP_053733_483_477_485. RefSeq identifier (NP_053733), Frameshift Start AA (483) or Splice AA see descriptions below, the amino acid start (477) and end (485) positions of the isoform's representative peptide in the protein sequence.
accession.number	QUILTS protein identifier prefixed by the RefSeq identifier of the reference protein.
numColumnsPGfeatureObserved	The number of TMT 6-plex experiments the proteogenomic event was observed in
numSpectraPGfeatureObserved	The total number of identified MS/MS spectra for the proteogenomic event across all 36 TMT 6-plex tumor experiments.
AS#	Number of tumors in all samples with RNA-seq evidence for the proteogenomic event
Reads Max	Maximum number of RNA-seq reads supporting the proteogenomic event in one of the samples
Frameshift Type	Primary splice types designated in QUILTS (full exon: A, partial exon: AN1, AN2, stop-introduced: ISED, inframe splice exon deletion).
Frameshift Sub Type	More detailed types designated in Spectrum Mill (frameshift-truncation, frameshift-extension, frameshift-substitution, insertion, deletion, insertion-short3, deletion-short3, stop-truncation). Truncation, extension, and substitution refer to the change in length of the isoform sequence relative to the reference sequence; shorter, longer, or equal, respectively.
Strand	The strand for the reference gene (+/-).
Frameshift Start AA	The position of the first amino acid in the isoform protein sequence that differs from the reference squence. If no differences, then the position of the first amino acid on the C-terminal side of the splice junction or the position of the last amino acid in the protein.
Frameshift End AA	The position of the last amino acid in the isoform protein sequence that differs from the reference squence. If the length of differences is < 2, then the same as the Frameshift Start AA.
Splice AA	The position of the first amino acid on the C-terminal side of the splice junction for full exon, in-frame splice isoforms.
bestScore	Spectrum Mill based protein score. Markers with a score > 8 should be considered true positives to reduce the number of false positives and increase the evidence of a translated mRNA isoform
bestDeltaForwardReverseScore	Spectrum Mill based scores. Negative scores score better in a decoy database and should be ignored

## Sheet: SpliceIsoforms
W4	W4	W4	W4	W4	W30	W30	W30	W30	W30	W21	W21	W21	W21	W21	W6	W6	W6	W6	W6	W2	W2	W2	W2	W2	W12	W12	W12	W12	W12
D1-B-2h	D3-B-50h	D3-WO-50h	D1-V-2h	D3-V-50h	D1-B-2h	D3-B-50h	D3-WO-50h	D1-V-2h	D3-V-50h	D1-B-2h	D3-B-50h	D3-WO-50h	D1-V-2h	D3-V-50h	D1-B-2h	D3-B-50h	D3-WO-50h	D1-V-2h	D3-V-50h	D1-B-2h	D3-B-50h	D3-WO-50h	D1-V-2h	D3-V-50h	D1-B-2h	D3-B-50h	D3-WO-50h	D1-V-2h	D3-V-50h	id	accession_number	numColumnsPGfeatureObserved	numSpectraPGfeatureObserved	GeneSymbol	bestScore	bestDeltaForwardReverseScore	AS#	Reads Max	Splice AA	Frameshift Type	Frameshift Sub Type	Strand	Frameshift Start AA	Frameshift End AA	StartAA	variableSites	previous_aa	sequence	next_aa
0.189	0.109	0.257	0.173	0.289	-0.126	-0.213	0.046	-0.065	-0.086	-0.126	-0.01	-0.105	-0.067	-0.049	-0.592	-0.5415	-0.476	-0.667	-0.531	0.076	0.095	-0.002	-0.087	0.023	0.315	0.185	0.277	0.282	0.265	NP_056285-AN2-3-chr2_523_585_611	NP_056285-AN2-3-chr2-73308548-73315177-stop1114-whim2	6	47	RAB11FIP5	24	23.42	1	2	523	AN2	frameshift-extension	-	523	1113	585		(R)	SEILAPAGVGLEAAGLQDPGPGAMTAK	(A)
-4.118	-5.006	-5.296	-6.504	-5.437	-3.676	-3.796	-2.991	-3.727	-3.993	-3.188	-3.599	-3.401	-3.486	-3.639	1.584	2.0705	2.224	1.768	2.296	-4.232	-5.159	-4.658	-4.929	-5.151	-3.629	-3.747	-3.236	-3.497	-2.942	NP_060276-AN1-1-chr20_34_73_104	NP_060276-AN1-1-chr20-62369000-62369197-stop181-whim6	6	17	LIME1	26.16	26.16	1	13	34	AN1	frameshift-truncation	+	34	180	73		(R)	AAPGPAQQQGPAACQHGSPAPTLAGGVQGHHR	(T)
0.204	0.219	0.13	0.085	0.199	-0.331	-0.417	-0.207	-0.399	-0.334	0.163	0.141	0.272	0.173	0.269	0.114	0.0825	0.162	0.005	0.174	-0.107	-0.068	-0.093	0.025	-0.083	0.359	0.1	0.329	-0.07	-0.098	NP_004621-AN2-4-chr11_448_548_560	NP_004621-AN2-4-chr11-64534748-64535042-stop619-whim30	6	34	SF1	17.31	17.31	1	1	448	AN2	frameshift-truncation	-	448	618	548		(R)	VHPAMATAAGGCR	(S)
0.05	-0.068	0.14	-0.084	-0.105	-0.198	-0.095	-0.187	0.191	-0.22	-0.251	-0.091	-0.196	-0.214	-0.23	0.258	0.3745	0.371	0.107	0.326	0.09	-0.049	0.192	-0.065	-0.016	-0.412	-0.251	-0.222	-0.268	-0.25	NP_061322-AN1-11-chr5_717_719_742	NP_061322-AN1-11-chr5-138658656-138660984-stop846-whim12	6	20	MATR3	24.6	24.6	6	411	717	AN1	frameshift-truncation	+	717	844	719		(R)	FPGSMEGFVTLDEVGDEEDSELQK	(L)
0.185	0.009	0.279	0.223	0.133	0.582	0.676	0.678	0.926	0.833	0.157	0.299	0.39	0.051	0.384	-0.149	-0.1315	-0.112	-0.098	-0.117	0.729	0.747	0.57	0.833	0.626	0.927	0.943	1.096	1.051	1.034	NP_055385-A-4-6_355_341_355	NP_055385-A-4-6-chr22-43204896-43213147-132-variant-whim21	6	9	ARFGAP3	20.64	20.64		0	355	ISED	inframe-splice-exon-deletion	-			341		(K)	YNDDSDDSYFTSSSR	(P)
0.244	0.074	0.21	-0.129	0.228	-0.231	-0.07	-0.041	0.019	-0.202	-0.011	0.12	0.075	0.128	0.262	0.172	0.0475	0.385	0.058	0.26	-0.31	-0.269	-0.354	-0.244	-0.383	-0.261	-0.157	-0.342	-0.188	-0.112	NP_003893-AN2-17-chr1_97_78_97	NP_003893-AN2-17-chr1-78432783-78433310-stop120-whim12	6	39	FUBP1	27.35	21.13	6	1216	97	AN2	frameshift-truncation	-	97	119	78		(K)	VAPQNDSFGTQLPPMHQQQR	(I)
0.539	0.206	0.367	0.365	0.851	-0.027	-0.19	0.158	0.354	0.101	0.417	0.604	0.493	0.428	0.568	-0.957	-1.1685	-0.965	-1.13	-1.018	-0.462	-0.277	-0.159	0.064	-0.154	-0.738	-0.936	-0.944	-0.807	-0.872	NP_057165-AN1-9-chr4_656_684_718	NP_057165-AN1-9-chr4-169633074-169798873-stop880-whim12	6	10	PALLD	19.86	19.4	4	104	656	AN1	frameshift-truncation	+	656	879	684		(R)	SAPPSPPFPPPPAFPELAACTPPASPEPMSALASR	(S)
0.966	0.952	0.989	0.974	1.307	-2.571	-2.308	-2.324	-1.995	-2.27	-3.462	-3.293	-3.51	-3.88	-3.472	0.498	0.7665	0.145	0.536	0.024	-0.422	-0.555	-0.697	-0.332	-0.624	0.7	1.088	1.222	1.072	0.992	NP_001146-A-5-7_525_510_534	NP_001146-A-5-7-chr5-150489407-150496687-18-whim12	6	13	ANXA6	21.26	21.26		0	525	ISED	inframe-splice-exon-deletion	-			510		(R)	EEGGENLDQAREDAQEIADTPSGDK	(T)
0.074	0.018	-0.023	-0.016	0.031	0.126	-0.015	-0.001	0.061	-0.117	0.352	-0.002	0.066	0.139	0.261	0.377	0.5165	0.431	0.34	0.429	0.168	0.076	0.135	0.191	0.167	0.214	0.139	0.18	0.144	0.081	NP_005007-A-7-10_198_177_200	NP_005007-A-7-10-chr12-53856351-53861004-135-whim12	6	15	PCBP2	20.27	20.69		0	198	ISED	inframe-splice-exon-deletion	+			177		(K)	GVTIPYRPKPSSSPVIFAGGQLTK	(L)
0.501	0.31	0.157	0.168	0.201	-0.077	-0.186	-0.032	-0.069	-0.252	-0.548	-0.622	-0.524	-0.51	-0.811	1.216	1.2815	0.667	1.14	0.604	0.047	-0.343	-0.086	0.034	-0.287	-0.252	-0.653	-0.513	-0.606	-0.356	NP_053733-AN1-15-chr22_533_524_545	NP_053733-AN1-15-chr22-29694885-29695184-stop580-whim12	6	13	EWSR1	21.6	21.6	5	110	533	AN1	frameshift-truncation	+	533	579	524		(R)	AGDWQCPNPSIGDFCCDVIVCR	(G)
-0.013	0.17	0.273	0.027	0.079	-0.331	-0.205	-0.173	-0.139	-0.238	0.323	0.338	0.432	0.432	0.455	-0.052	0.0705	0.302	0.035	0.176	-0.241	-0.118	-0.197	-0.095	-0.364	-0.446	-0.371	-0.411	-0.415	-0.309	NP_112552-A-9-11_111_104_115	NP_112552-A-9-11-chr9-86588314-86589431-72-whim12	6	26	HNRNPK	19.47	12.58		0	111	ISED	inframe-splice-exon-deletion	-			104		(K)	IIPTLEEYQHYK	(G)
0.258	0.19	0.418	0.01	0.179	0.523	0.401	0.571	0.593	0.502	-0.368	-0.639	-0.103	-0.32	-0.168	0.774	0.7665	1.222	0.686	0.923	-1.038	-0.605	-0.762	-0.933	-0.681	-0.123	-0.147	-0.178	-0.21	-0.31	NP_003361-AN1-8-chr19_292_284_297	NP_003361-AN1-8-chr19-46026953-46027101-stop339-whim12	6	12	VASP	18.05	17.13	6	103	292	AN1	frameshift-truncation	+	292	338	284		(K)	TPKDESANEEPEAR	(V)
0.117	0.186	0.16	0.088	0.101	-0.065	-0.091	0.001	0.044	-0.267	0.028	0.176	0.213	0.062	0.04	0.129	0.0845	0.362	0.128	0.265	0.389	0.67	0.528	0.408	0.433	-1.309	-1.119	-1.305	-1.284	-1.314	NP_054758-AN1-5-chr11_170_195_211	NP_054758-AN1-5-chr11-93488552-93490481-stop229-whim12	6	20	C11orf54	16.17	16.17	6	235	170	AN1	frameshift-truncation	+	170	228	195		(K)	HYGNKPIGMGGTFIIQK	(G)
-1.411	-1.366	-1.505	-1.425	-1.432	0.359	0.091	0.236	0.059	-0.481	1.683	1.675	1.238	1.843	1.876	0.022	0.1715	0.316	0.3	0.476	-0.467	-0.441	-0.483	-0.442	-0.53	-2.04	-2.501	-1.592	-2.635	-2.405	NP_001027454-A-4-7_222_217_225	NP_001027454-A-4-7-chr12-98931350-98938728-216-whim12	6	17	TMPO	15.95	15.95		0	222	ISED	inframe-splice-exon-deletion	+			217		(R)	VEHNQVVNR	(V)
0.206	-0.104	0.054	0.224	0.143	-0.254	-0.151	-0.037	-0.04	0.114	0.269	0.32	0.218	0.217	0.377	0.485	0.3995	0.265	0.468	0.268	-0.13	0.502	0.157	0.342	0.193	0.053	0.082	0.116	0.029	0.335	NP_000995-AN1-3-chr11_91_62_93	NP_000995-AN1-3-chr11-812633-812762-stop115-whim12	6	9	RPLP2	27.4	26.79	6	292	91	AN1	deletion-short3	+	91	91	62		(K)	LASVPAGGAVAVSAAPGSAAPAAGSAPAAEEK	(K)
-0.15	-0.493	-0.473	-0.522	-0.105	0.825	0.731	0.99	1.033	1.118	-0.338	-0.231	-0.268	-0.359	-0.285	-0.905	-0.8565	-0.394	-1.057	-0.557	0.347	0.626	0.591	0.07	0.494	-0.483	-0.377	-0.507	-0.355	-0.106	NP_001070675-A-13-15_517_511_519	NP_001070675-A-13-15-chr4-83778917-83783686-78-variant-whim2	6	13	SEC31A	13.16	6.52		0	517	ISED	inframe-splice-exon-deletion	-			511		(K)	VDGANVHIK	(E)
NA	NA	NA	NA	NA	0.154	0.284	0.227	0.29	0.264	-0.208	-0.105	0.139	-0.11	-0.032	-0.011	-0.3835	-0.242	-0.307	-0.133	0.06	-0.185	-0.02	0.085	0.125	0.263	0.262	0.327	0.276	0.222	NP_064505-A-20-22_746_745_767	NP_064505-A-20-22-chr2-128913161-128914825-24-whim12	6	9	UGGT1	25.14	25.14		0	746	ISED	inframe-splice-exon-deletion	+			745		(K)	KDDSFIRPVTFWIVGDFDSPSGR	(Q)
-1.103	-0.98	-1.004	-1.285	-1.325	-0.547	NA	-0.257	-0.216	-0.533	0.885	1.052	0.269	0.747	0.599	NA	NA	NA	NA	NA	0.379	0.018	0.383	0.391	NA	NA	NA	NA	NA	NA	NP_067013-AN1-8-chr1_302_297_331	NP_067013-AN1-8-chr1-97250810-97270340-stop379-whim12	6	9	PTBP2	23.77	21.18	5	37	302	AN1	frameshift-truncation	+	302	378	297		(K)	ETSLLGLPVAAVPGALSPLAIPNAAAAAAAAAAGR	(V)
-0.128	0.192	0.666	0.04	0.436	-0.827	-0.816	-0.11	-1.104	-1.038	-1.885	-0.681	-0.954	-1.701	-1.092	-1.342	-1.1415	-1.514	-1.288	-1.937	0.438	-0.049	0.581	-0.108	-0.331	-0.254	-0.366	0.052	0.266	0.364	NP_002151-A-12-14_1527_1519_1546	NP_002151-A-12-14-chr9-117808961-117819431-273-variant-whim6	6	12	TNC	23.4	23.4		0	1527	ISED	inframe-splice-exon-deletion	-			1519		(K)	TISATATTEAEPEVDNLLVSDATPDGFR	(L)
0.967	0.467	0.234	0.528	1.508	-1.123	-1.428	-1.483	-1.213	-1.79	-0.621	-0.955	-0.691	-0.924	-0.161	1.882	1.8975	1.483	1.687	1.206	-1.563	-1.142	-1.148	-0.929	-1.556	-1.463	-0.835	-0.523	-1.169	-0.158	NP_000843-AN1-2-chr11_13_13_34	NP_000843-AN1-2-chr11-67351640-67351967-stop84-whim12	6	8	GSTP1	22.35	22.35	5	34	13	AN1	frameshift-truncation	+	13	83	13		(R)	DQGQSWKEEVVTVETWQEGSLK	(A)
0.264	0.55	0.5	0.511	0.356	-0.868	-1.088	-0.987	-0.725	-1.271	0.219	0.265	0.356	0.089	0.246	0.073	0.1095	-0.252	-0.27	-0.244	-0.356	-0.281	-0.41	-0.797	-0.729	-0.214	-0.282	-0.286	-0.239	-0.164	NP_004990-A-31-33_1138_1133_1149	NP_004990-A-31-33-chr6-76618344-76623779-27-whim12	6	18	MYO6	21.6	21.6		0	1138	ISED	inframe-splice-exon-deletion	+			1133		(K)	SVTDYAQQNPAAQIPAR	(Q)
0.358	0.288	0.287	0.265	0.624	-0.106	-0.161	-0.103	0.045	-0.098	0.505	0.552	0.424	0.453	0.523	-0.324	-0.6095	0.046	-0.447	-0.134	-0.136	-0.169	-0.33	-0.601	-0.485	-0.729	-0.592	-0.674	-0.45	-0.537	NP_002015-AN1-16-chrX_580_573_587	NP_002015-AN1-16-chrX-147027136-147030253-stop616-whim12	6	17	FMR1	20.35	17.37	6	199	580	AN1	deletion	+	580	580	573		(R)	TTDGSLQNTSSEGSR	(L)
-0.633	-0.95	-0.614	-0.563	-0.798	-0.542	-0.55	-0.518	-0.479	-0.632	-0.134	0.605	0.374	0.284	0.114	-0.363	-0.2635	-0.398	-0.291	-0.381	0.63	0.618	0.594	0.621	0.521	-0.147	-0.14	-0.19	-0.189	-0.439	NP_001001329-AN1-10-chr19_344_344_362	NP_001001329-AN1-10-chr19-11558433-11558507-stop408-whim12	6	9	PRKCSH	19.6	19.6	6	405	344	AN1	frameshift-truncation	+	344	407	344		(K)	EAPPPLSPPQPASPAEEDK	(M)
0.428	0.245	0.457	0.243	0.426	-0.272	-0.334	-0.179	-0.227	-0.115	-0.155	-0.112	-0.055	-0.242	-0.203	-0.329	-0.4515	-0.424	-0.303	-0.273	0.49	0.434	0.314	0.219	0.34	0.348	0.193	0.309	0.268	0.46	NP_057039-AN2-4-chr2_195_176_196	NP_057039-AN2-4-chr2-32112157-32117060-stop204-whim2	6	10	MEMO1	18.32	15.06	2	4	195	AN2	frameshift-truncation	-	195	203	176		(K)	YLADPSNLFVVSSDFCHWGKR	(A)
0.104	-0.11	-0.115	-0.405	0.141	-2.822	-2.744	-2.655	-2.772	-2.775	0.68	0.987	0.838	0.823	0.749	1.024	0.9985	0.911	0.868	0.823	-2.056	-2.164	-2.148	-2.403	-2.25	-1.782	-1.863	-1.858	-1.701	-1.89	NP_004915-AN1-7-chr19_248_240_255	NP_004915-AN1-7-chr19-39200116-39201915-stop316-whim12	6	18	ACTN4	17.89	17.89	6	367	248	AN1	frameshift-truncation	+	248	315	240		(K)	MLDAEDIVGTLRPDEK	(A)
0.155	0.013	0.058	0.076	0.227	0.051	-0.14	-0.038	0.163	0.03	-0.019	-0.062	0.079	0.092	-0.007	-0.119	-0.1305	-0.347	-0.041	-0.143	0.714	0.449	0.718	0.341	0.502	-0.119	-0.025	-0.098	-0.063	-0.153	NP_476516-AN1-17-chr4_719_715_723	NP_476516-AN1-17-chr4-140300008-140305988-stop778-whim12	6	11	NAA15	17.89	12.32	5	389	719	AN1	frameshift-truncation	+	719	777	715		(R)	LFNTVCESK	(D)
-0.082	-0.18	-0.287	0.097	-0.255	0.182	0.347	0.303	0.628	0.389	-0.296	-0.489	-0.576	-0.423	-0.334	0.023	-0.2435	-0.127	-0.27	-0.156	0.201	0.345	0.073	0.261	-0.051	0.196	0.353	0.214	0.305	0.412	NP_002366-A-13-15_177_174_183	NP_002366-A-13-15-chr3-47958664-47963254-123-variant-whim30	6	13	MAP4	17.21	15.65		0	177	ISED	inframe-splice-exon-deletion	-			174		(K)	DSYVPLELAK	(E)
0.157	-0.107	-0.221	-0.052	0.15	0.194	0.204	0.284	0.238	0.347	-0.336	-0.426	-0.356	-0.217	-0.325	-0.392	-0.4125	-0.507	-0.557	-0.509	-0.062	-0.02	-0.072	-0.081	-0.1	0.389	0.493	0.265	0.513	0.225	NP_997657-AN1-5-chr17_270_261_270	NP_997657-AN1-5-chr17-80012851-80013040-stop311-whim12	6	7	GPS1	17	10.01	6	255	270	AN1	frameshift-truncation	+	270	310	261		(K)	AESTPEIAER	(G)
-0.624	-0.542	-0.517	-0.62	-0.621	-0.005	-0.078	-0.098	0.366	0.212	0.894	0.975	0.963	0.852	0.869	0.874	0.9695	0.686	0.712	0.791	-1.054	-0.847	-1.192	-1.146	-1.02	-3.294	-3.44	-3.185	-3.261	-3.388	NP_001119526-A-7-9_580_573_583	NP_001119526-A-7-9-chrX-41413168-41419031-36-whim12	6	6	CASK	15.6	14		0	580	ISED	inframe-splice-exon-deletion	-			573		(R)	TQSSSCEIYVR	(A)
0.503	0.455	0.417	0.117	0.485	-0.284	-0.263	-0.195	-0.146	-0.183	0.077	0.194	0.164	0.152	0.087	0.165	0.1445	0.04	0.238	-0.203	0.027	0.32	0.047	0.179	-0.092	-0.623	-0.3	-0.268	-0.359	-0.404	NP_060362-A-18-20_193_187_196	NP_060362-A-18-20-chr2-153533989-153535865-54-whim12	6	11	PRPF40A	15.33	10.32		0	193	ISED	inframe-splice-exon-deletion	-			187		(K)	ELEDLEAMIK	(A)
-0.002	-0.058	0.023	-0.204	0.142	-0.002	-0.215	0.137	0.083	-0.343	0.379	0.145	0.373	0.465	0.369	-0.064	-0.0285	-0.175	-0.101	0.043	-0.268	0.014	-0.12	-0.235	-0.196	-0.285	0.014	-0.089	0.048	0.098	NP_005959-A-12-14_374_372_385	NP_005959-A-12-14-chr19-8539128-8550486-54-whim12	6	13	HNRNPM	15.26	11.28		0	374	ISED	inframe-splice-exon-deletion	+			372		(R)	INGGGGGSVPGIER	(M)
-0.244	-0.202	-0.252	-0.066	-0.215	-0.9	-0.965	-0.89	-0.758	-1.003	0.376	0.602	0.386	0.333	0.565	-0.269	-0.1585	0.344	-0.489	0.175	0.595	0.671	0.656	0.642	0.61	-0.128	-0.12	-0.123	-0.13	-0.064	NP_001124437-AN1-5-chr7_221_271_278	NP_001124437-AN1-5-chr7-883157-888054-stop288-whim12	6	12	SUN1	14.78	14.78	6	972	221	AN1	frameshift-truncation	+	221	287	271		(K)	DCESESYK	(S)
1.075	0.84	0.973	0.745	1.218	-0.428	-0.983	-0.679	-0.887	-1.155	0.469	0.549	0.382	0.463	0.677	0.046	-0.0485	0.523	0.013	0.272	-0.557	-0.505	-0.572	-1.128	-0.611	-1.036	-0.881	-1.045	-0.838	-0.744	NP_004990-A-27-30_1037_1036_1044	NP_004990-A-27-30-chr6-76602407-76617321-69-whim12	6	6	MYO6	11.96	11.96		0	1037	ISED	inframe-splice-exon-deletion	+			1036		(R)	RGPAVLATK	(A)
-0.306	-0.348	-0.312	-0.079	-0.307	NA	NA	NA	NA	NA	-1.876	-1.595	-1.695	-1.797	-1.683	-2.318	-2.3045	-2.464	-2.563	-2.355	-0.228	-0.147	-0.209	-0.034	-0.22	0.869	0.887	0.825	0.951	0.973	NP_036222-AN1-35-chr1_1544_2578_2597	NP_036222-AN1-35-chr1-39793025-39796874-stop3371-whim12	5	84	MACF1	28.5	28.5	3	21	1544	AN1	frameshift-truncation	+	1544	3370	2578		(R)	EIQEVQAFTGNFVDLISGQR	(L)
0.359	0.44	0.456	-0.025	0.405	NA	NA	NA	NA	NA	0.324	0.609	0.367	0.377	0.291	-0.108	-0.2205	0.163	-0.175	0.07	-0.442	-0.236	-0.436	-0.381	-0.486	0.103	0.406	0.46	-0.033	0.115	NP_055949-AN1-15-chr17_722_1672_1692	NP_055949-AN1-15-chr17-17064670-17067422-stop2004-whim12	5	37	MPRIP	23.87	18.87	6	40	722	AN1	frameshift-extension	+	722	2003	1672		(K)	ASLLEEIAAALPSLPPVESLR	(D)
0.075	-0.073	-0.001	-0.29	0.066	0.106	0.144	0.062	0.191	0.081	0.134	0.037	0.084	0.281	0.189	0.582	0.5405	0.641	0.574	0.66	-0.468	-0.676	-0.623	-0.726	-0.568	NA	NA	NA	NA	NA	NP_001159477-AN1-15-chr1_729_744_757	NP_001159477-AN1-15-chr1-29391670-29422666-stop888-whim2	5	35	EPB41	19.8	19.8	5	104	729	AN1	frameshift-extension	+	729	887	744		(K)	GPSTNPDSEWEGPK	(H)
NA	NA	NA	NA	NA	NA	NA	NA	NA	NA	0.078	0	-0.143	-0.072	-0.257	0.161	0.1645	-0.013	0.137	0.198	0.053	-0.118	-0.2	-0.025	-0.044	0.031	0.054	0.075	-0.052	0.175	NP_775945-AN1-14-chr6_539_530_553	NP_775945-AN1-14-chr6-117866760-117869069-stop716-whim12	5	11	DCBLD1	20.82	21.21	6	303	539	AN1	frameshift-extension	+	539	715	530		(K)	LDLITSDMADYQQPLMIGTGTVTR	(K)
-0.337	0.029	-0.343	0.136	-0.716	0.312	0.265	0.364	0.338	0.14	NA	NA	NA	NA	NA	0.59	0.7105	0.867	0.411	0.634	0.463	0.441	0.364	0.63	0.348	-0.392	-0.477	-0.431	-0.524	-0.432	NP_056667-AN1-10-chr13_843_858_867	NP_056667-AN1-10-chr13-76408523-76409287-stop908-whim12	5	12	LMO7	18.11	16.46	5	83	843	AN1	frameshift-truncation	+	843	907	858		(K)	TLNLTSMATK	(I)
0.019	-0.034	-0.028	0.399	-0.111	-0.76	-0.677	-0.606	-0.508	-0.899	NA	NA	NA	NA	NA	-1.454	-0.6605	-0.629	-1.112	-0.535	0.35	0.226	0.259	0.234	0.197	NA	NA	NA	NA	NA	NP_001035905-AN1-23-chr5_604_577_606	NP_001035905-AN1-23-chr5-96098076-96100927-stop641-whim12	5	5	CAST	24.6	22.39	6	493	604	AN1	frameshift-truncation	+	604	640	577		(K)	LAAAISEVVSQTPASTTQAGAPPRDTSSDK	(D)
0.071	-0.032	0.127	0.107	0.184	0.423	0.45	0.515	0.636	0.339	-0.514	-0.303	-0.51	-0.542	-0.469	0.491	0.4115	0.455	0.27	0.282	NA	NA	NA	NA	NA	0.278	0.473	0.34	0.413	0.346	NP_003361-AN1-6-chr19_241_241_251	NP_003361-AN1-6-chr19-46025839-46025978-stop287-whim12	5	14	VASP	19.1	11.22	6	88	241	AN1	frameshift-truncation	+	241	286	241		(K)	EEASGGPTAPK	(A)
0.233	0.143	0.079	-0.055	0.214	0.175	0.145	0.451	-0.004	0.263	0.934	0.746	1.052	0.856	0.73	0.091	-0.0895	-0.409	-0.221	0.041	0.039	-0.182	-0.093	-0.087	-0.09	NA	NA	NA	NA	NA	NP_005547-AN1-6-chr12_329_327_335	NP_005547-AN1-6-chr12-52636921-52639177-stop429-whim2	5	6	KRT7	14.51	14.51	2	10	329	AN1	frameshift-truncation	+	329	428	327		(K)	NQLHCCPQR	(A)
-0.747	-0.782	-0.929	-0.081	-0.912	-0.48	0.005	-0.576	0.035	0.012	NA	NA	NA	NA	NA	-0.048	-0.5135	0.412	-0.525	0.046	0.308	1.668	1.585	1.502	0.579	-0.321	-0.435	-0.159	-0.531	-1.426	NP_001124437-AN1-5-chr7_221_228_241	NP_001124437-AN1-5-chr7-883157-889559-stop291-whim2	5	9	SUN1	18.67	18.67	3	4	221	AN1	frameshift-truncation	+	221	290	228		(R)	HLDAHTAAHSQSPR	(L)
NA	NA	NA	NA	NA	0.081	0.209	-0.106	0.414	0.264	0.153	-0.166	-0.004	-0.072	0.087	-0.653	-0.3985	0.113	-0.282	-0.26	NA	NA	NA	NA	NA	-0.298	-0.057	0.035	0.026	0.159	NP_001258898-AN1-4-chr6_216_205_216	NP_001258898-AN1-4-chr6-44217891-44218056-stop217-whim2	5	9	HSP90AB1	13.63	13.78	1	2	216	AN1	frameshift-truncation	+	216	216	205		(K)	HSQFIGYPITLY	(-)
-0.574	-0.638	-0.484	-1.272	-0.293	1.835	1.744	1.908	1.989	1.888	-1.124	-1.008	-0.887	-0.842	-0.8	-0.788	-0.5785	-0.542	-0.615	-0.379	-0.604	-0.466	-0.612	-0.963	-0.791	NA	NA	NA	NA	NA	NP_002127-A-6-8_227_226_252	NP_002127-A-6-8-chr12-54676449-54677595-75-whim2	5	8	HNRNPA1	23.3	23.3		0	227	ISED	inframe-splice-exon-deletion	+			226		(R)	GSNFGGGGSYNDFGNYNNQSSNFGPMK	(G)
NA	NA	NA	NA	NA	-0.472	-0.205	-0.046	0.329	-0.446	-0.272	-0.188	-0.097	-0.269	-0.291	0.185	0.2625	-0.03	0.091	0.149	0.079	-0.068	0.074	-0.016	-0.063	0.31	0.251	0.135	0.169	0.251	NP_001034679-AN1-12-chrX_589_575_591	NP_001034679-AN1-12-chrX-41010310-41012185-stop640-whim12	5	10	USP9X	22.78	22.78	5	262	589	AN1	frameshift-truncation	+	589	639	575		(R)	EICSLFGEAPQNLSSSR	(F)
-0.226	-0.21	-0.4	0.048	-0.305	-0.99	-1.109	-0.881	-0.365	-1	NA	NA	NA	NA	NA	-0.514	-0.3175	-0.267	-0.598	-0.241	0.626	0.38	0.549	0.418	0.384	0.051	-0.024	-0.191	0.085	0.304	NP_996744-A-13-16_2633_2617_2633	NP_996744-A-13-16-chr10-123987523-123996909-231-variant-whim21	5	8	TACC2	21.22	18.91		0	2633	ISED	inframe-splice-exon-deletion	+			2617		(K)	ELEAMGLGTPSEAIEIR	(E)
-0.003	-0.082	0.237	0.068	0.166	-0.199	-0.51	-0.265	-0.41	-0.181	NA	NA	NA	NA	NA	0.215	0.2615	0.058	0.047	-0.09	-0.245	0.016	-0.334	-0.061	-0.176	0.124	0.156	0.437	0.188	0.203	NP_002151-A-12-19_1072_1069_1091	NP_002151-A-12-19-chr9-117808961-117835881-1638-variant-whim6	5	6	TNC	20.76	20.76		0	1072	ISED	inframe-splice-exon-deletion	-			1069		(K)	ASTEAEPEVDNLLVSDATPDGFR	(L)
0.117	-0.068	-0.176	-0.175	0.059	0.218	0.201	0.153	0.296	0.18	-0.907	-0.89	-1.187	-0.888	-0.799	-0.296	-0.2995	-0.076	-0.243	0.031	NA	NA	NA	NA	NA	0.296	0.342	0.296	0.39	0.473	NP_001263206-A-23-25_975_970_984	NP_001263206-A-23-25-chr5-102515889-102520372-174-variant-whim6	5	8	PPIP5K2	19.23	14.98		0	975	ISED	inframe-splice-exon-deletion	+			970		(K)	TATNDVVSENANYLR	(T)
-0.445	-0.425	-0.396	-0.521	-0.359	NA	NA	NA	NA	NA	0.464	0.541	0.586	0.482	0.594	-0.296	-0.0955	-0.05	-0.232	-0.093	-0.226	-0.132	-0.276	-0.191	-0.357	-0.751	-0.52	-0.577	-0.726	-0.699	NP_056060-AN1-3-chr6_147_142_151	NP_056060-AN1-3-chr6-34937943-34940357-stop203-whim12	5	6	ANKS1A	17.49	17.49	5	35	147	AN1	frameshift-truncation	+	147	202	142		(R)	VNEQNALEIK	(E)
0.116	0.159	-0.051	-0.15	0.299	-0.222	-0.192	-0.051	0.048	-0.099	0.165	0.17	-0.004	0.037	-0.104	-0.625	-0.7385	-0.587	-0.54	-0.718	NA	NA	NA	NA	NA	-0.443	-0.46	-0.578	-0.432	-0.271	NP_680781-AN1-10-chr16_441_421_449	NP_680781-AN1-10-chr16-28842393-28843507-stop542-whim12	5	5	ATXN2L	17.36	17.36	6	37	441	AN1	frameshift-truncation	+	441	541	421		(K)	TLSSPSNRPSGETSVPPPPAAPPFLPVGR	(M)
1.066	0.915	0.637	0.422	1.125	-0.325	-0.378	-0.341	-0.144	-0.395	NA	NA	NA	NA	NA	-0.343	-0.2425	-0.56	0.053	-0.642	-0.434	-0.445	-0.262	-0.538	-0.525	-0.388	-0.402	-0.125	-0.411	-0.11	NP_002781-AN2-2-chr1_217_210_230	NP_002781-AN2-2-chr1-109944709-109952549-stop241-whim12	5	9	PSMA5	17.18	17.18	2	8	217	AN2	deletion-short3	-	217	217	210		(K)	LNATNIEATVQPGQNFHMFTK	(E)
0.55	0.488	0.57	0.241	0.664	0.415	0.213	0.177	0.483	0.356	-0.633	-0.431	-0.626	-0.546	-0.594	0.66	0.6035	0.736	0.674	0.735	-0.615	-0.523	-0.51	-0.532	-0.506	NA	NA	NA	NA	NA	NP_443195-AN2-3-chr8_518_532_541	NP_443195-AN2-3-chr8-144396756-144397896-stop553-whim21	5	5	TOP1MT	15.86	8.66	1	10	518	AN2	frameshift-truncation	-	518	552	532		(R)	SQLTATSASR	(V)
-2.559	-2.671	-2.874	-2.609	-2.036	NA	NA	NA	NA	NA	-0.315	-0.928	-0.539	-0.762	-0.18	-1.198	-0.7665	0.77	-1.342	0.36	-0.97	-0.744	-0.795	-1.053	-1.559	0.018	0.413	0.912	0.006	1.064	NP_003748-AN1-10-chr1_300_299_308	NP_003748-AN1-10-chr1-32696620-32696721-stop324-whim2	5	5	EIF3I	15.06	11.57	1	4	300	AN1	deletion-short3	+	300	300	299		(K)	SSGGEDGYVR	(I)
0.087	-0.216	0.011	-0.273	0.13	-0.131	-0.241	-0.197	-0.465	-0.227	NA	NA	NA	NA	NA	0.604	0.4625	0.502	0.28	0.251	-0.041	0.013	-0.055	-0.037	-0.233	-0.441	-0.209	-0.529	-0.251	-0.342	NP_005830-AN1-10-chr1_467_459_468	NP_005830-AN1-10-chr1-24987290-24987803-stop504-whim12	5	7	SRRM1	13.59	8.29	6	208	467	AN1	frameshift-truncation	+	467	503	459		(R)	KVELSESEDK	(G)
-0.326	-0.374	-0.306	-0.367	-0.506	NA	NA	NA	NA	NA	-0.383	-0.235	-0.379	-0.279	-0.137	-0.22	-0.3875	-0.25	-0.303	-0.596	0.267	0.287	0.443	0.229	0.171	0.224	0.382	0.369	0.393	0.168	NP_001840-A-7-9_311_307_317	NP_001840-A-7-9-chr21-47536317-47536683-27-variant-whim30	5	6	COL6A2	12.7	12.7		0	311	ISED	inframe-splice-exon-deletion	+			307		(K)	GEKGAPGLAGK	(N)
-0.952	-0.748	-0.92	-0.591	-1	0.465	0.728	0.783	0.603	0.642	NA	NA	NA	NA	NA	-1.419	-1.0935	0.19	-1.44	-0.08	-1.325	-0.991	-1.109	-1.034	-1.547	-0.135	0.763	0.699	0.645	1.22	NP_002435-AN1-11-chrX_449_449_456	NP_002435-AN1-11-chrX-64958479-64958837-stop533-whim2	5	6	MSN	12.41	9.7	1	1	449	AN1	frameshift-truncation	+	449	532	449		(K)	MVQEDLEK	(T)
NA	NA	NA	NA	NA	-0.285	-0.118	-0.312	0.049	-0.139	-0.774	-0.63	-0.844	-0.954	-0.705	NA	NA	NA	NA	NA	NA	NA	NA	NA	NA	0.052	-0.142	-0.101	0.011	0.295	NP_002037-AN1-2-chr12_44_119_139	NP_002037-AN1-2-chr12-6645759-6645850-stop336-whim12	4	5	GAPDH	12.98	12.98	6	205	44	AN1	frameshift-substitution	+	44	334	119	M130m	(R)	VIISAPSADAPmFVMGVNHEK	(Y)
0.068	-0.076	-0.011	-0.067	-0.033	NA	NA	NA	NA	NA	0.31	0.379	0.375	0.303	0.255	0.453	0.5545	0.213	0.625	0.265	0.08	-0.126	-0.128	-0.041	0.054	NA	NA	NA	NA	NA	NP_001157745-AN1-12-chr15_1480_1489_1502	NP_001157745-AN1-12-chr15-42028896-42032103-stop1594-whim12	4	12	MGA	14.64	14.64	5	66	1480	AN1	frameshift-truncation	+	1480	1593	1489		(K)	LLLGQMGALHPANR	(L)
NA	NA	NA	NA	NA	0.372	0.492	0.375	0.431	0.324	-0.227	0.155	-0.099	-0.114	-0.396	-0.268	-0.0145	0.061	-0.025	0.07	NA	NA	NA	NA	NA	0.505	0.486	0.168	0.546	0.148	NP_000843-AN1-5-chr11_113_104_115	NP_000843-AN1-5-chr11-67352712-67353577-stop152-whim12	4	7	GSTP1	17.73	15.78	5	45	113	AN1	frameshift-truncation	+	113	151	104		(K)	YISLIYTNYAGK	(D)
-0.205	0.146	0.187	0.096	0.14	-0.388	-0.27	-0.12	0.007	-0.264	NA	NA	NA	NA	NA	-0.031	-0.0355	0.227	0.021	0.164	-0.146	0.04	-0.037	-0.192	-0.085	NA	NA	NA	NA	NA	NP_077295-A-4-6_98_132_149	NP_077295-A-4-6-chr1-228290083-228290343-83-stop152-whim2	4	4	C1orf35	18.2	18.2	1	1	98	A	frameshift-truncation	-	98	151	132		(R)	DLGSLGQEEAAGGGSDGK	(Q)
NA	NA	NA	NA	NA	-0.229	0.09	0.073	-0.191	-0.163	0.004	-0.013	-0.265	0.093	-0.024	NA	NA	NA	NA	NA	0.031	0.064	-0.094	0.274	-0.039	0.325	-0.102	-0.023	0.043	-0.06	NP_006833-AN1-6-chr11_223_223_246	NP_006833-AN1-6-chr11-65824426-65824739-stop261-whim12	4	5	SF3B2	19.19	19.32	6	41	223	AN1	frameshift-truncation	+	223	260	223		(R)	AAPVGPVGPTPTVLPMGAPVPRPR	(G)
NA	NA	NA	NA	NA	0.228	0.123	0.538	0.383	0.286	0.579	0.221	0.264	0.281	0.239	0.091	0.0625	0.045	-0.038	-0.166	0.132	0.375	0.201	-0.12	0.126	NA	NA	NA	NA	NA	NP_775855-AN1-6-chr11_263_311_321	NP_775855-AN1-6-chr11-830713-830811-stop482-whim2	4	6	EFCAB4A	18.44	12.4	1	1	263	AN1	frameshift-extension	+	263	481	311		(R)	TQLEGAQEQIR	(R)
-0.17	0.036	0.288	-0.162	0.002	0.436	0.53	0.543	0.664	0.687	0.68	0.772	-0.212	0.354	0.428	NA	NA	NA	NA	NA	NA	NA	NA	NA	NA	-0.497	-0.305	-0.356	-0.346	-0.088	NP_060729-AN1-16-chr11_752_767_784	NP_060729-AN1-16-chr11-43436326-43457713-stop812-whim12	4	5	TTC17	17.65	17.65	6	617	752	AN1	frameshift-truncation	+	752	811	767		(K)	YFDNSQSLDAAEEEPSER	(G)
-0.182	-0.396	-0.256	-0.291	-0.109	0.423	0.434	0.455	0.389	0.235	NA	NA	NA	NA	NA	0.816	1.0245	1.033	0.734	0.896	-0.14	-0.333	-0.307	-0.455	-0.47	NA	NA	NA	NA	NA	NP_001004019-A-13-15_991_988_1005	NP_001004019-A-13-15-chr3-13671445-13672828-117-variant-whim12	4	5	FBLN2	23.97	23.97		0	991	ISED	inframe-splice-exon-deletion	+			988		(R)	CEDIDECAQGAGILCTFR	(C)
NA	NA	NA	NA	NA	0.225	0.213	0.497	0.455	-0.088	NA	NA	NA	NA	NA	0.655	0.7705	0.778	0.914	0.927	0.32	-0.077	0.032	0.145	0.295	-1.928	-1.544	-1.838	-1.995	-1.778	NP_150091-AN2-7-chr9_326_316_326	NP_150091-AN2-7-chr9-15471208-15472629-stop327-whim2	4	7	PSIP1	15.66	12	1	1	326	AN2	frameshift-truncation	-	326	326	316		(K)	RKQEEQMETEQ	(-)
NA	NA	NA	NA	NA	-0.148	-0.189	-0.2	-0.084	-0.073	-0.074	0.549	0.149	0.078	-0.058	0.242	0.1165	-0.165	0.118	-0.323	NA	NA	NA	NA	NA	-0.672	-0.693	-0.223	-0.201	-0.286	NP_653205-AN1-2-chr16_230_230_249	NP_653205-AN1-2-chr16-88653092-88653949-stop308-whim12	4	6	ZC3H18	23.01	19.7	6	159	230	AN1	frameshift-truncation	+	230	307	230		(K)	DVVTPLSTLLPPISNSIPFR	(G)
0.21	0.255	0.181	0.027	0.323	NA	NA	NA	NA	NA	0.122	0.322	0.261	0.066	0.357	0.375	0.2705	0.379	0.307	0.497	NA	NA	NA	NA	NA	-0.288	-0.176	-0.463	-0.185	-0.047	NP_689630-AN2-2-chr8_230_256_276	NP_689630-AN2-2-chr8-56656180-56663522-stop300-whim2	4	4	TMEM68	19.76	16.5	3	20	230	AN2	frameshift-extension	-	230	298	256		(R)	TYLGDPIPYDPQITAEELAEK	(V)
NA	NA	NA	NA	NA	-0.325	-0.062	-0.22	-0.171	-0.288	0.052	0.376	0.187	0.333	0.397	-0.054	0.1355	0.191	-0.11	0.338	-0.197	-0.113	-0.178	-0.141	-0.306	NA	NA	NA	NA	NA	NP_055949-A-18-20_864_854_867	NP_055949-A-18-20-chr17-17077389-17079739-120-variant-whim21	4	4	MPRIP	19.03	19.03		0	864	ISED	inframe-splice-exon-deletion	+			854		(R)	ENQELNAHNQVLLR	(V)
-0.644	-1.211	-1.342	-1.144	-0.756	0.272	0.329	0.343	0.355	0.297	0.395	0.222	0.126	0.358	0.589	NA	NA	NA	NA	NA	NA	NA	NA	NA	NA	0.269	0.517	0.205	0.227	0.784	NP_001127894-AN1-2-chr3_107_100_115	NP_001127894-AN1-2-chr3-133293959-133302848-stop165-whim12	4	4	CDV3	18.81	18.81	6	78	107	AN1	frameshift-truncation	+	107	164	100		(R)	VQAMQISEKEEDDNEK	(R)
-0.21	-0.048	-0.02	0.703	-0.135	-0.369	-0.31	-0.276	-0.486	-0.549	NA	NA	NA	NA	NA	NA	NA	NA	NA	NA	1.397	1.283	1.499	1.303	0.927	-0.442	0.05	0.266	-0.021	0.018	NP_006466-A-4-8_670_663_674	NP_006466-A-4-8-chr13-38143958-38151889-261-whim30	4	9	POSTN	18.42	13.39		0	670	ISED	inframe-splice-exon-deletion	-			663		(K)	EIPVTVYSPEIK	(Y)
-0.713	-0.986	-1.041	-0.674	-0.8	-0.438	-0.179	-0.176	-0.417	-0.266	0.803	0.989	0.766	0.863	1.14	0.135	0.1005	0.459	0.065	0.2	NA	NA	NA	NA	NA	NA	NA	NA	NA	NA	NP_008938-AN1-5-chr12_232_251_268	NP_008938-AN1-5-chr12-69651685-69651814-stop293-whim12	4	4	CPSF6	18.13	15.14	6	48	232	AN1	frameshift-truncation	+	232	292	251		(R)	IPWHMGHSIEEIPIFGLK	(G)
0.646	0.649	0.421	0.194	0.811	-1.134	-1.248	-0.989	-0.92	-1.301	NA	NA	NA	NA	NA	0.563	0.6055	0.178	0.595	0.264	0.9	0.985	1.022	0.828	0.766	NA	NA	NA	NA	NA	NP_054861-A-2-4_163_160_172	NP_054861-A-2-4-chr10-12212769-12214763-9-whim2	4	5	NUDT5	18.05	17.6		0	163	ISED	inframe-splice-exon-deletion	-			160		(K)	PKPEFVEVISLPK	(N)
-0.09	-0.181	0.018	0.104	-0.104	NA	NA	NA	NA	NA	NA	NA	NA	NA	NA	NA	NA	NA	NA	NA	0.182	0.342	0.39	0.353	0.161	-0.108	-0.005	-0.07	-0.128	-0.293	NP_001123917-A-14-16_1049_1044_1060	NP_001123917-A-14-16-chr2-182784173-182786674-66-variant-whim6	4	4	SSFA2	17.69	17.69		0	1049	ISED	inframe-splice-exon-deletion	+			1044		(R)	SSALMVTELMQEQSYLK	(S)
0.016	-0.062	-0.049	-0.173	-0.024	-0.135	-0.216	-0.152	-0.051	-0.154	-0.405	-0.501	-0.458	-0.716	-0.386	0.083	0.3825	0.397	0.357	0.393	NA	NA	NA	NA	NA	NA	NA	NA	NA	NA	NP_005959-A-10-13_333_323_340	NP_005959-A-10-13-chr19-8536311-8548041-123-whim2	4	4	HNRNPM	16.99	16.99		0	333	ISED	inframe-splice-exon-deletion	+			323		(K)	GIGMGNIGPAEILSNALK	(R)
-0.051	-0.198	-0.088	-0.319	-0.051	-0.162	-0.273	-0.089	-0.099	-0.148	-0.123	0.074	-0.097	-0.275	-0.172	NA	NA	NA	NA	NA	NA	NA	NA	NA	NA	0.141	0.137	0.22	0.168	0.173	NP_001104026-A-39-41_410_401_417	NP_001104026-A-39-41-chrX-153593854-153594675-201-variant-whim30	4	5	FLNA	16.57	14.85		0	410	ISED	inframe-splice-exon-deletion	-			401		(K)	TTYFEIFTAACNPSACR	(A)
0.747	0.67	0.635	0.858	0.61	-0.228	-0.405	-0.28	-0.483	-0.58	NA	NA	NA	NA	NA	NA	NA	NA	NA	NA	0.289	-0.276	-0.383	-0.163	0.023	0.132	0.503	0.783	0.612	0.821	NP_005547-AN1-7-chr12_403_395_403	NP_005547-AN1-7-chr12-52639416-52641923-stop428-whim2	4	4	KRT7	15.08	5.88	3	10	403	AN1	frameshift-truncation	+	403	427	395		(K)	LLEGEESRK	(E)
0.64	0.546	0.56	0.581	0.365	NA	NA	NA	NA	NA	-0.283	-0.142	-0.384	-0.188	-0.17	-1.204	-0.9805	-1.164	-1.072	-1.1	-0.593	-0.653	-0.517	-0.538	-0.738	NA	NA	NA	NA	NA	NP_001408-A-6-8_223_215_227	NP_001408-A-6-8-chr12-53416411-53421798-138-whim12	4	4	EIF4B	13.94	13.94		0	223	ISED	inframe-splice-exon-deletion	+			215		(R)	RGDDSFGDSYDSR	(I)
0.171	0.426	0.217	-0.166	0.154	NA	NA	NA	NA	NA	NA	NA	NA	NA	NA	-0.134	-0.0965	-0.046	-0.502	-0.176	-0.445	-0.137	0.065	-0.432	-0.497	-0.568	0.895	1.125	0.698	1.55	NP_001157860-AN2-13-chr5_694_712_719	NP_001157860-AN2-13-chr5-130808513-130815205-stop720-whim30	4	4	RAPGEF6	10.94	6.09	1	1	694	AN2	frameshift-truncation	-	694	719	712		(K)	VIYDILLK	(-)
0.053	0.263	0.111	0.809	-0.051	NA	NA	NA	NA	NA	-2.052	-1.795	-1.865	-2.086	-1.896	-0.73	-0.8715	-1.448	-0.794	-1.576	-0.223	0.033	-0.104	0.248	-0.095	NA	NA	NA	NA	NA	NP_065812-AN1-18-chr17_701_776_786	NP_065812-AN1-18-chr17-78865637-78866530-stop831-whim2	4	4	RPTOR	9.91	4.18	1	1	701	AN1	frameshift-truncation	+	701	830	776		(R)	SISCPSRPSTR	(C)
0.117	0.359	0.593	-0.302	0.415	NA	NA	NA	NA	NA	-0.395	-0.215	-0.415	-0.488	-0.685	NA	NA	NA	NA	NA	-0.376	-1.37	-0.962	-1.619	-0.388	-0.259	-0.157	-0.237	-0.115	0.39	NP_056017-A-5-7_137_133_150	NP_056017-A-5-7-chr16-27642483-27689049-132-variant-whim12	4	4	KIAA0556	9.6	5.47		0	137	ISED	inframe-splice-exon-deletion	+			133		(R)	GWHQELRRSLELSVNLQR	(K)
0.057	0.143	0.263	0.022	0.238	1.015	1.192	1.273	1.262	1.032	-0.133	-0.068	-0.094	-0.02	-0.102	NA	NA	NA	NA	NA	NA	NA	NA	NA	NA	NA	NA	NA	NA	NA	NP_588615-AN1-10-chr9_270_326_336	NP_588615-AN1-10-chr9-116779064-116791012-stop388-whim12	3	5	ZNF618	12.87	3.66	5	84	270	AN1	frameshift-truncation	+	270	387	326		(R)	TPPATQTQTFR	(T)
-0.052	-0.185	-0.235	-0.476	-0.234	NA	NA	NA	NA	NA	0.838	0.878	0.701	0.792	0.846	-0.445	-0.7515	-0.407	-0.483	-0.511	NA	NA	NA	NA	NA	NA	NA	NA	NA	NA	NP_001095868-A-5-7_167_147_176	NP_001095868-A-5-7-chr1-23648156-23660010-177-variant-whim30	3	3	HNRNPR	25.35	21.97		0	167	ISED	inframe-splice-exon-deletion	-			147		(K)	YGGPPPDSVYSGVQPGIGTECDSYEIRPGK	(H)
0.612	0.491	0.252	0.499	1.057	NA	NA	NA	NA	NA	0.278	0.075	0.206	-0.025	0.641	0.591	0.5755	0.257	0.463	-0.191	NA	NA	NA	NA	NA	NA	NA	NA	NA	NA	NP_055958-AN1-6-chr4_172_148_172	NP_055958-AN1-6-chr4-99962277-99964472-stop173-whim30	3	3	METAP1	24.75	23	1	1	172	AN1	frameshift-truncation	+	172	172	148		(R)	EVLDVAAGMIKPGVTTEEIDHAVHL	(-)
NA	NA	NA	NA	NA	-0.819	-0.714	-0.683	-0.619	-0.749	NA	NA	NA	NA	NA	-0.254	-0.0025	-0.248	-0.266	-0.322	-0.057	0.164	-0.048	0.212	0.068	NA	NA	NA	NA	NA	NP_002366-A-16-18_75_64_84	NP_002366-A-16-18-chr3-47969840-48040127-69-variant-whim30	3	3	MAP4	22.13	16.87		0	75	ISED	inframe-splice-exon-deletion	-			64		(K)	KKPCSETSQIEGSPTEFLEEK	(M)
0.732	0.61	0.683	0.385	1.081	0.565	0.35	0.329	0.352	0.307	-0.425	-0.921	-0.828	-0.863	-0.15	NA	NA	NA	NA	NA	NA	NA	NA	NA	NA	NA	NA	NA	NA	NA	NP_001189402-AN2-2-chr19_64_305_313	NP_001189402-AN2-2-chr19-53454834-53456003-stop651-whim2	3	3	ZNF816-ZNF321P	10.83	10.83	1	1	64	AN2	frameshift-extension	-	64	649	305		(R)	LHTGEKPYK	(C)
NA	NA	NA	NA	NA	0.011	-0.075	-0.183	0.226	-0.107	NA	NA	NA	NA	NA	-0.044	0.0155	-0.152	-0.114	-0.133	-0.243	0.586	0.161	0.357	-0.365	NA	NA	NA	NA	NA	NP_444271-AN1-14-chr7_994_990_1010	NP_444271-AN1-14-chr7-155538296-155556502-stop1140-whim12	3	3	RBM33	21.04	15.04	6	52	994	AN1	frameshift-truncation	+	994	1139	990		(K)	LSGGQGGESDGFFHPEGQPQR	(L)
0.636	0.45	0.528	0.509	0.773	NA	NA	NA	NA	NA	0.5	0.586	0.487	0.451	0.559	NA	NA	NA	NA	NA	0.178	0.099	0.074	-0.04	0.143	NA	NA	NA	NA	NA	NP_694587-AN1-9-chr6_322_342_349	NP_694587-AN1-9-chr6-18200807-18201716-stop386-whim12	3	4	KDM1B	11.84	5.02	5	198	322	AN1	frameshift-truncation	+	322	384	342		(R)	ITDPTIDK	(R)
NA	NA	NA	NA	NA	-0.053	0.052	-0.168	-0.066	-0.195	NA	NA	NA	NA	NA	0.455	0.2835	0.296	0.394	0.484	0.269	0.215	0.023	0.351	0.183	NA	NA	NA	NA	NA	NP_036425-A-19-21_118_114_135	NP_036425-A-19-21-chr2-1687923-1695699-72-variant-whim6	3	3	PXDN	19.73	17.34		0	118	ISED	inframe-splice-exon-deletion	-			114		(K)	YLYLHFNQIETLDPDSFQHLPK	(L)
NA	NA	NA	NA	NA	NA	NA	NA	NA	NA	NA	NA	NA	NA	NA	-0.222	-0.4185	-0.166	-0.392	-0.296	0.07	0.189	-0.021	0.203	0.042	0.863	1.06	1.08	0.987	1.351	NP_001035905-A-2-4_47_42_56	NP_001035905-A-2-4-chr5-96011305-96058342-72-whim12	3	3	CAST	18.93	18.93		0	47	ISED	inframe-splice-exon-deletion	+			42		(K)	KGSDEVSASSGATSK	(S)
NA	NA	NA	NA	NA	0.317	0.34	0.497	0.552	0.389	0.902	0.909	0.748	0.704	0.866	0.207	-0.0015	0.544	0.101	0.595	NA	NA	NA	NA	NA	NA	NA	NA	NA	NA	NP_005742-A-18-20_1640_1636_1654	NP_005742-A-18-20-chr7-91670212-91671981-141-variant-whim30	3	4	AKAP9	18.76	18.76		0	1640	ISED	inframe-splice-exon-deletion	+			1636		(R)	QLAQNGNENQGEVEEQTFK	(E)
NA	NA	NA	NA	NA	-0.008	-0.056	-0.028	-0.347	-0.283	-0.308	-0.107	-0.16	-0.231	-0.296	0.245	0.3115	-0.365	0.239	-0.196	NA	NA	NA	NA	NA	NA	NA	NA	NA	NA	NP_055455-AN1-6-chr2_659_736_751	NP_055455-AN1-6-chr2-219610954-219611752-stop755-whim2	3	3	TTLL4	18.26	18.26	3	19	659	AN1	frameshift-truncation	+	659	754	736		(K)	APPGTEVSTQTLPHQR	(Q)
0.145	0.204	0.321	0.138	0.343	NA	NA	NA	NA	NA	-0.165	-0.452	-0.299	-0.5	-0.346	NA	NA	NA	NA	NA	-0.235	-0.522	-0.392	-0.257	-0.339	NA	NA	NA	NA	NA	NP_115941-AN1-11-chr9_666_657_675	NP_115941-AN1-11-chr9-124533003-124534951-stop978-whim12	3	3	DAB2IP	18.16	18.16	5	79	666	AN1	frameshift-truncation	+	666	977	657		(K)	MVIENDLSGSSGVQPSPAR	(S)
-0.004	-0.008	0.075	-0.199	0.021	-0.036	0.079	0.079	0.476	0.12	-0.21	-0.245	-0.156	-0.182	-0.144	NA	NA	NA	NA	NA	NA	NA	NA	NA	NA	NA	NA	NA	NA	NA	NP_001239542-AN1-9-chr2_793_783_806	NP_001239542-AN1-9-chr2-71607695-71615752-stop868-whim12	3	3	ZNF638	18.15	15.85	5	23	793	AN1	frameshift-truncation	+	793	867	783		(K)	AVEIVTSTSAESVDQTQQLVPLVR	(N)
NA	NA	NA	NA	NA	-0.163	-0.393	-0.255	0.094	0.007	0.37	0.516	0.345	0.504	0.445	0.349	0.4135	0.129	0.227	0.082	NA	NA	NA	NA	NA	NA	NA	NA	NA	NA	NP_001243806-A-4-6_1002_993_1008	NP_001243806-A-4-6-chr9-731266-734747-240-whim2	3	3	KANK1	17.51	17.51		0	1002	ISED	inframe-splice-exon-deletion	+			993		(K)	NLQFVGINGGYELSEK	(M)
NA	NA	NA	NA	NA	NA	NA	NA	NA	NA	0.618	0.436	0.631	0.653	0.647	-0.02	-0.1465	-0.19	-0.086	-0.036	-0.14	-0.302	-0.106	-0.037	-0.292	NA	NA	NA	NA	NA	NP_006591-AN1-4-chr1_144_143_155	NP_006591-AN1-4-chr1-27268309-27269147-stop220-whim12	3	3	NUDC	16.72	16.72	5	24	144	AN1	frameshift-truncation	+	144	219	143		(K)	QQDTEEDEEEDEK	(D)
NA	NA	NA	NA	NA	0.562	0.523	0.707	0.571	0.46	NA	NA	NA	NA	NA	-1.559	-1.4315	-1.269	-1.58	-1.613	-1.508	-1.185	-1.148	-1.533	-1.642	NA	NA	NA	NA	NA	NP_001104026-A-12-14_1896_1892_1901	NP_001104026-A-12-14-chrX-153581825-153582282-174-variant-whim30	3	3	FLNA	16.71	16.71		0	1896	ISED	inframe-splice-exon-deletion	-			1892		(K)	DAGEGDDSMR	(M)
-0.112	-0.125	-0.302	-0.038	-0.211	NA	NA	NA	NA	NA	NA	NA	NA	NA	NA	NA	NA	NA	NA	NA	0.399	0.053	0.169	0.419	0.019	1.158	0.918	0.797	0.837	0.251	NP_055760-A-9-12_297_294_305	NP_055760-A-9-12-chr5-148612863-148619321-186-whim12	3	5	ABLIM3	16.44	14.2		0	297	ISED	inframe-splice-exon-deletion	+			294		(R)	VICDIYENLDLR	(Q)
NA	NA	NA	NA	NA	NA	NA	NA	NA	NA	-1.202	-0.003	0.423	0.205	0.453	-0.271	-0.2985	0.513	-0.41	0.587	NA	NA	NA	NA	NA	NA	NA	NA	NA	NA	NP_001072993-A-2-5_72_60_72	NP_001072993-A-2-5-chr4-57308026-57314583-200-stop73-whim2	3	3	PAICS	16.1	14.01	1	3	72	A	frameshift-truncation	+	72	72	60		(K)	ITSCIFQLLQEAG	(-)
-0.105	-0.049	0.059	0.094	0.146	-0.901	-0.602	-0.225	-0.536	-0.23	NA	NA	NA	NA	NA	NA	NA	NA	NA	NA	0.794	0.972	1.089	1.315	0.481	NA	NA	NA	NA	NA	NP_004732-AN1-10-chr10_581_580_589	NP_004732-AN1-10-chr10-103920850-103921013-stop614-whim12	3	3	NOLC1	15.88	15.87	3	20	581	AN1	frameshift-truncation	+	581	613	580		(K)	SESHCVTQTR	(V)
0.301	0.379	0.315	0.099	0.327	0.396	0.613	0.491	0.794	0.703	NA	NA	NA	NA	NA	-0.147	-0.2105	-0.389	-0.104	-0.51	NA	NA	NA	NA	NA	NA	NA	NA	NA	NA	NP_002222-AN1-5-chr11_147_178_187	NP_002222-AN1-5-chr11-44636923-44639717-stop308-whim2	3	3	CD82	15.57	11.14	1	2	147	AN1	frameshift-extension	+	147	307	178		(K)	GEEDNSLSVR	(K)
-1.064	-1.513	-1.046	-0.297	-0.998	NA	NA	NA	NA	NA	-0.903	-0.856	-0.921	-0.882	-0.92	NA	NA	NA	NA	NA	NA	NA	NA	NA	NA	-0.047	0.33	0.665	0.211	0.548	NP_112533-A-3-6_206_204_218	NP_112533-A-3-6-chr7-26233314-26236176-144-whim2	3	4	HNRNPA2B1	15.06	12.15		0	206	ISED	inframe-splice-exon-deletion	-			204		(R)	GGGNFGGSPGYGGGR	(G)
0.845	0.643	0.609	0.335	1.049	NA	NA	NA	NA	NA	-0.14	-0.185	-0.052	-0.282	0.093	1.017	1.0155	0.965	0.743	0.843	NA	NA	NA	NA	NA	NA	NA	NA	NA	NA	NP_036222-AN1-91-chr1_5303_5310_5320	NP_036222-AN1-91-chr1-39945681-39946591-stop5347-whim12	3	3	MACF1	14.88	14.88	6	402	5303	AN1	frameshift-truncation	+	5303	5346	5310		(R)	CYDKPWLVNSK	(A)
-0.71	-0.38	-0.53	0.06	-0.991	NA	NA	NA	NA	NA	NA	NA	NA	NA	NA	NA	NA	NA	NA	NA	0.185	0.311	0.174	0.541	0.196	1.223	1.24	1.266	1.099	1.032	NP_055760-A-12-14_402_401_409	NP_055760-A-12-14-chr5-148619451-148622053-99-whim12	3	3	ABLIM3	14.59	10.63		0	402	ISED	inframe-splice-exon-deletion	+			401		(R)	SAGDSNIYR	(K)
NA	NA	NA	NA	NA	NA	NA	NA	NA	NA	0.966	0.773	0.905	0.818	0.997	-0.31	-0.1355	-0.201	-0.229	-0.272	NA	NA	NA	NA	NA	-0.153	-0.067	-0.137	0.128	0.122	NP_005007-AN1-13-chr12_355_440_459	NP_005007-AN1-13-chr12-53865591-53868652-stop471-whim12	3	5	PCBP2	13.84	12.38	6	59	355	AN1	frameshift-extension	+	355	470	440		(K)	GTGASATTTTTSAVPCVTNK	(L)
NA	NA	NA	NA	NA	NA	NA	NA	NA	NA	-0.026	0.07	0.104	0.025	-0.226	0.245	0.1865	0.118	0.169	0.178	-0.22	-0.469	-0.438	-0.718	-0.337	NA	NA	NA	NA	NA	NP_073594-AN2-10-chr3_102_132_140	NP_073594-AN2-10-chr3-123674813-123675201-stop149-whim2	3	3	CCDC14	13.74	13.74	1	1	102	AN2	frameshift-truncation	-	102	148	132		(K)	HTIPLVVQK	(E)
NA	NA	NA	NA	NA	0.811	0.639	0.661	0.826	0.65	NA	NA	NA	NA	NA	NA	NA	NA	NA	NA	-0.253	-0.001	-0.002	-0.039	-0.422	-0.098	0.495	0.571	0.577	0.959	NP_000117-AN2-2-chr15_323_322_330	NP_000117-AN2-2-chr15-76508935-76518189-stop333-whim2	3	3	ETFA	13.5	8.24	1	1	323	AN2	deletion-short3	-	323	323	322		(K)	VPEMTEILK	(K)
NA	NA	NA	NA	NA	-0.345	-0.549	-0.366	-0.168	-0.207	-0.004	-0.116	0.06	-0.088	-0.077	NA	NA	NA	NA	NA	NA	NA	NA	NA	NA	NA	NA	NA	NA	NA	NP_680780-A-11-13_507_499_514	NP_680780-A-11-13-chr16-28843720-28844137-72-whim2	3	3	ATXN2L	12.49	12.49		0	507	ISED	inframe-splice-exon-deletion	+			499		(K)	ISLAPTDVPGLQNEQK	(R)
0.257	0.17	0.083	-0.171	0.429	0.067	0.142	0.173	0.345	0.017	NA	NA	NA	NA	NA	NA	NA	NA	NA	NA	NA	NA	NA	NA	NA	-0.092	-0.08	-0.34	-0.049	0.065	NP_055720-AN1-14-chr2_551_551_559	NP_055720-AN1-14-chr2-191796363-191797382-stop560-whim12	3	3	GLS	12.47	12.47	5	68	551	AN1	frameshift-truncation	+	551	559	551		(R)	LGPFFTQVH	(-)
-1.304	-1.506	-1.265	-0.898	-1.387	NA	NA	NA	NA	NA	2.136	2.082	2.229	2.05	2.075	-1.402	-1.6455	-1.638	-1.727	-1.534	NA	NA	NA	NA	NA	NA	NA	NA	NA	NA	NP_060130-A-8-10_501_500_507	NP_060130-A-8-10-chr19-19612225-19613139-75-whim12	3	3	GATAD2A	11.98	6.63		0	501	ISED	inframe-splice-exon-deletion	+			500		(K)	QASSQLSR	(G)
NA	NA	NA	NA	NA	NA	NA	NA	NA	NA	0.304	0.434	0.243	0.205	0.253	-0.089	0.0125	-0.115	-0.148	-0.113	0.18	0.202	0.239	-0.099	-0.007	NA	NA	NA	NA	NA	NP_002015-AN1-16-chrX_580_573_580	NP_002015-AN1-16-chrX-147027136-147029932-stop583-whim12	3	3	FMR1	11.95	8.94	6	28	580	AN1	frameshift-truncation	+	580	582	573		(R)	TTDGSLQK	(K)
-0.437	-0.679	-0.603	-0.608	-0.418	NA	NA	NA	NA	NA	0.67	0.531	0.515	0.566	0.764	NA	NA	NA	NA	NA	-0.695	-0.542	-0.645	-0.345	-0.799	NA	NA	NA	NA	NA	NP_077321-A-4-6_352_347_356	NP_077321-A-4-6-chr9-37854979-37860044-111-whim12	3	3	DCAF10	11.71	8.22		0	352	ISED	inframe-splice-exon-deletion	+			347		(R)	TTSSSGVSPR	(N)
NA	NA	NA	NA	NA	NA	NA	NA	NA	NA	-0.698	-0.417	-0.462	-0.647	-0.527	-0.156	-0.2265	-0.209	-0.301	-0.258	-0.452	-0.482	-0.373	-0.483	-0.639	NA	NA	NA	NA	NA	NP_006550-A-5-7_303_347_354	NP_006550-A-5-7-chr1-32502644-32504152-202-stop356-whim12	3	3	KHDRBS1	11.66	8.51	3	2	303	A	frameshift-truncation	+	303	355	347		(R)	TTGMGPGR	(R)
NA	NA	NA	NA	NA	0.238	0.221	0.337	0.687	0.231	-0.354	-0.571	-0.433	-0.551	-0.3	-0.943	-0.8595	0.09	-1.072	-0.093	NA	NA	NA	NA	NA	NA	NA	NA	NA	NA	NP_071347-A-21-23_654_671_678	NP_071347-A-21-23-chr3-49742189-49742966-199-stop690-whim2	3	3	RNF123	11.17	5.22	1	1	654	A	frameshift-truncation	+	654	689	671		(R)	SLSSPSPR	(T)
NA	NA	NA	NA	NA	NA	NA	NA	NA	NA	0.016	-0.237	-0.156	-0.344	0.087	-0.987	-0.5225	1.452	-1.067	1.102	NA	NA	NA	NA	NA	-0.355	0.39	0.019	0.179	0.431	NP_079010-A-8-10_109_103_110	NP_079010-A-8-10-chr14-95679746-95688027-93-whim2	3	4	CLMN	10.61	7.93		0	109	ISED	inframe-splice-exon-deletion	-			103		(K)	FLEDSNIK	(E)
-0.166	-0.22	-0.068	0.387	-0.178	NA	NA	NA	NA	NA	NA	NA	NA	NA	NA	0.188	0.4095	-0.104	0.148	-0.118	0.955	2.038	1.544	1.828	1.485	NA	NA	NA	NA	NA	NP_068750-A-18-20_602_623_630	NP_068750-A-18-20-chr20-37654002-37659346-82-stop639-whim2	3	3	DHX35	10.56	2.36	3	5	602	A	frameshift-truncation	+	602	638	623		(R)	LAGSSITK	(L)
NA	NA	NA	NA	NA	NA	NA	NA	NA	NA	1.433	1.499	0.547	1.001	1.184	0.385	0.0105	-0.468	0.041	-0.22	-0.442	0.089	-0.274	0.029	-0.407	NA	NA	NA	NA	NA	NP_001171577-A-10-12_247_240_248	NP_001171577-A-10-12-chrX-152090800-152097118-90-whim12	3	3	ZNF185	9.92	9.92		0	247	ISED	inframe-splice-exon-deletion	+			240		(R)	STPGSNSSR	(G)
NA	NA	NA	NA	NA	NA	NA	NA	NA	NA	-0.123	-0.434	-0.391	-0.644	0.026	-1.753	-1.1915	0.865	-1.624	0.426	NA	NA	NA	NA	NA	-0.244	1.09	1.108	0.837	1.706	NP_004727-AN1-9-chr1_379_377_386	NP_004727-AN1-9-chr1-180794480-180799802-stop394-whim6	3	11	XPR1	9.9	9.9	1	1	379	AN1	frameshift-truncation	+	379	393	377		(K)	LLESHFLLYK	(I)
0.055	-0.2	0.062	0.125	0.048	NA	NA	NA	NA	NA	-1.982	-1.783	-1.757	-1.881	-1.956	-1.916	-1.2035	-1.979	-1.839	-2.059	NA	NA	NA	NA	NA	NA	NA	NA	NA	NA	NP_053733-AN1-14-chr22_483_477_485	NP_053733-AN1-14-chr22-29693939-29694740-stop543-whim4	3	3	EWSR1	9.72	6.9	1	9	483	AN1	frameshift-truncation	+	483	542	477		(R)	GGPGGPMGR	(M)
NA	NA	NA	NA	NA	-0.619	-0.966	-0.338	-0.556	-0.769	NA	NA	NA	NA	NA	NA	NA	NA	NA	NA	NA	NA	NA	NA	NA	0.197	0.41	0.456	0.008	0.571	NP_001180346-AN1-2-chrX_35_36_43	NP_001180346-AN1-2-chrX-41196718-41198291-stop58-whim12	3	3	DDX3X	9.34	9.34	4	66	35	AN1	frameshift-truncation	+	35	57	36		(R)	RYIPPHLR	(N)
-0.541	-0.404	-0.378	-0.198	-0.651	NA	NA	NA	NA	NA	-1.097	-1.113	-1.103	-1.09	-1.154	NA	NA	NA	NA	NA	0.594	0.918	1.01	0.894	0.624	NA	NA	NA	NA	NA	NP_001188291-AN2-2-chr6_50_120_127	NP_001188291-AN2-2-chr6-79912596-79913296-stop192-whim2	3	3	HMGN3	9.26	3.52	3	15	50	AN2	frameshift-extension	-	50	191	120		(R)	STEQIQER	(N)
NA	NA	NA	NA	NA	NA	NA	NA	NA	NA	0.326	0.555	0.359	0.49	-0.124	-0.594	-0.5655	-0.691	-0.705	-0.566	NA	NA	NA	NA	NA	-0.223	-0.127	-0.158	-0.115	-0.213	NP_066953-AN1-4-chr7_120_92_120	NP_066953-AN1-4-chr7-44839473-44840022-stop121-whim12	3	3	PPIA	9.2	9.2	6	106	120	AN1	frameshift-truncation	+	120	120	92		(K)	HTGPGILSMANAGPNTNGSQFFICTAKTE	(-)
NA	NA	NA	NA	NA	0.046	0.447	0.501	-0.363	0.398	-0.282	-0.732	-0.64	-0.756	-0.343	-2.761	-1.8435	0.921	-2.381	0.442	NA	NA	NA	NA	NA	NA	NA	NA	NA	NA	NP_001139334-A-11-14_109_106_115	NP_001139334-A-11-14-chr1-149906219-149907191-222-whim2	3	4	MTMR11	9.18	9.18		0	109	ISED	inframe-splice-exon-deletion	-			106		(R)	LEAGQGSGSR	(K)
NA	NA	NA	NA	NA	-1.353	-1.417	-1.296	-1.707	-2.008	NA	NA	NA	NA	NA	-2.983	-2.9385	-3.281	-2.986	-3.022	NA	NA	NA	NA	NA	0.432	0.61	0.585	0.557	0.804	NP_001157859-AN2-4-chr5_1263_1262_1280	NP_001157859-AN2-4-chr5-130772098-130775273-stop1413-whim2	3	5	RAPGEF6	8.95	5.34	1	1	1263	AN2	frameshift-truncation	-	1263	1412	1262		(K)	GVFASLPPVGSIISDHSSK	(I)
NA	NA	NA	NA	NA	NA	NA	NA	NA	NA	0.221	0.243	0.254	0.349	0.169	-0.032	0.0485	-0.333	0.102	-0.123	0.017	-0.084	-0.148	-0.189	-0.023	NA	NA	NA	NA	NA	NP_009049-AN1-2-chr5_78_73_85	NP_009049-AN1-2-chr5-14271008-14272473-stop117-whim2	3	3	TRIO	8.32	6.8	1	1	78	AN1	frameshift-truncation	+	78	116	73		(K)	VAYLSVRGDGHVK	(K)
-1.061	-1.665	-1.431	-1.477	-1.216	0.067	-0.42	-0.074	-0.188	-0.378	NA	NA	NA	NA	NA	NA	NA	NA	NA	NA	-0.415	-0.194	-0.406	-0.348	-0.996	NA	NA	NA	NA	NA	NP_001248357-AN1-18-chr2_800_797_809	NP_001248357-AN1-18-chr2-11945282-11945672-stop882-whim2	3	3	LPIN1	7.87	7.87	1	2	800	AN1	frameshift-truncation	+	800	881	797		(K)	VSQQVLAALQTLR	(A)
NA	NA	NA	NA	NA	NA	NA	NA	NA	NA	NA	NA	NA	NA	NA	NA	NA	NA	NA	NA	0.24	0.459	0.163	0.388	0.268	0.37	-0.43	0.143	-0.069	0.011	NP_001258652-AN1-13-chr5_640_803_813	NP_001258652-AN1-13-chr5-147805264-147806772-stop898-whim2	2	3	FBXO38	16.49	13.13	3	3	640	AN1	frameshift-truncation	+	640	897	803		(R)	ACVVNGPDGTR	(S)
NA	NA	NA	NA	NA	NA	NA	NA	NA	NA	NA	NA	NA	NA	NA	NA	NA	NA	NA	NA	-0.353	-0.317	-0.477	-0.425	-0.327	0.274	0.171	0.417	0.379	0.437	NP_060710-AN1-8-chr1_349_345_375	NP_060710-AN1-8-chr1-158058244-158059243-stop414-whim12	2	2	KIRREL	26.1	21.69	5	161	349	AN1	frameshift-truncation	+	349	413	345		(K)	DSNMGPRPPGSPPEAALSAQVLSNSNQLLLK	(S)
NA	NA	NA	NA	NA	0.836	0.814	0.796	1.045	0.74	-0.122	-0.201	-0.101	-0.218	-0.158	NA	NA	NA	NA	NA	NA	NA	NA	NA	NA	NA	NA	NA	NA	NA	NP_055949-AN1-6-chr17_246_296_305	NP_055949-AN1-6-chr17-17039764-17041445-stop346-whim2	2	3	MPRIP	18.15	11.43	3	3	246	AN1	frameshift-truncation	+	246	345	296		(R)	QYATLADVPK	(A)
NA	NA	NA	NA	NA	-0.714	-0.432	-0.168	-0.437	-0.483	NA	NA	NA	NA	NA	NA	NA	NA	NA	NA	NA	NA	NA	NA	NA	NA	NA	NA	NA	NA	NP_079445-AN1-4-chr3_272_437_445	NP_079445-AN1-4-chr3-44609925-44611416-stop754-whim12	2	2	ZKSCAN7	15.38	15.38	4	8	272	AN1	frameshift-extension	+	272	753	437		(K)	PYECSECGK	(A)
NA	NA	NA	NA	NA	0.465	0.423	0.276	0.371	0.214	0.084	0.233	0.047	-0.103	0.246	NA	NA	NA	NA	NA	NA	NA	NA	NA	NA	NA	NA	NA	NA	NA	NP_001001329-AN1-7-chr19_229_207_235	NP_001001329-AN1-7-chr19-11556288-11557062-stop304-whim12	2	2	PRKCSH	13.38	13.38	5	32	229	AN1	frameshift-truncation	+	229	303	207		(K)	AQQEQELAADAFKELDDDMDGTLLLPRPR	(R)
0.81	0.852	0.464	0.827	1.172	NA	NA	NA	NA	NA	0.254	0.253	0.103	0.376	0.364	NA	NA	NA	NA	NA	NA	NA	NA	NA	NA	NA	NA	NA	NA	NA	NP_004481-AN2-13-chr2_109_125_137	NP_004481-AN2-13-chr2-165424914-165476196-stop183-whim2	2	3	GRB14	14.63	14.63	1	3	109	AN2	frameshift-truncation	-	109	181	125		(R)	VTLPAITPIILQK	(R)
NA	NA	NA	NA	NA	0.114	-0.002	-0.198	0.103	-0.243	NA	NA	NA	NA	NA	NA	NA	NA	NA	NA	0.167	-0.982	-0.018	-0.329	-0.202	NA	NA	NA	NA	NA	NP_064555-AN1-11-chr19_446_433_463	NP_064555-AN1-11-chr19-3206188-3206262-stop524-whim12	2	2	NCLN	24.31	24.31	6	331	446	AN1	frameshift-truncation	+	446	523	433		(K)	GTPPDMPVFTEQMIQQEQLDSVMDWLTNQPR	(A)
NA	NA	NA	NA	NA	0.169	-0.184	0.168	-0.141	-0.172	-0.243	0.115	0.262	-0.189	-0.042	NA	NA	NA	NA	NA	NA	NA	NA	NA	NA	NA	NA	NA	NA	NA	NP_060167-A-13-15_608_583_611	NP_060167-A-13-15-chr8-95690599-95709079-151-stop637-whim2	2	3	ESRP1	14.77	14.77	5	208	608	A	frameshift-truncation	+	608	636	583		(R)	ALQPSTAYYPAGTQLFMNYTAYYPSMQPR	(M)
NA	NA	NA	NA	NA	NA	NA	NA	NA	NA	0.796	0.587	0.81	0.624	1.038	NA	NA	NA	NA	NA	NA	NA	NA	NA	NA	NA	NA	NA	NA	NA	NP_036361-AN2-5-chr10_386_368_386	NP_036361-AN2-5-chr10-104851361-104852895-stop387-whim6	2	2	NT5C2	23.1	23.1	1	1	386	AN2	frameshift-truncation	-	386	386	368		(R)	TFLVIPELAQELHVWTDKS	(-)
NA	NA	NA	NA	NA	NA	NA	NA	NA	NA	-0.608	-0.761	-0.499	-0.792	-0.403	NA	NA	NA	NA	NA	0.346	0.44	0.126	0.585	0.382	NA	NA	NA	NA	NA	NP_055779-AN1-4-chr17_325_324_344	NP_055779-AN1-4-chr17-19215457-19216435-stop385-whim12	2	2	EPN2	22.6	22.48	5	23	325	AN1	frameshift-truncation	+	325	384	324		(K)	EQTTLLDLMDALPSSGPAAQK	(A)
0.879	0.639	0.452	0.049	0.762	NA	NA	NA	NA	NA	NA	NA	NA	NA	NA	NA	NA	NA	NA	NA	-0.229	-0.144	-0.151	-0.485	-0.265	NA	NA	NA	NA	NA	NP_919223-A-7-9_275_258_300	NP_919223-A-7-9-chr2-178081668-178083764-141-whim12	2	2	HNRNPA3	22.6	22.6		0	275	ISED	inframe-splice-exon-deletion	+			258		(R)	GSYGGGDGGYNGFGGDGNYGGGGNYNDFGNYSGQQQSNYGPMK	(G)
2.73	2.473	2.411	1.662	2.727	NA	NA	NA	NA	NA	NA	NA	NA	NA	NA	NA	NA	NA	NA	NA	-0.358	-0.045	0.129	0.327	-0.036	NA	NA	NA	NA	NA	NP_112533-A-2-4_254_239_277	NP_112533-A-2-4-chr7-26232993-26235466-120-whim12	2	2	HNRNPA2B1	22.35	22.35		0	254	ISED	inframe-splice-exon-deletion	-			239		(R)	GFGDGYNGYGGGPGGNYGSGNYNDFGNYNQQPSNYGPMK	(S)
NA	NA	NA	NA	NA	NA	NA	NA	NA	NA	0.261	0.116	0.233	0.325	0.446	0.887	0.4445	0.736	0.561	0.968	NA	NA	NA	NA	NA	NA	NA	NA	NA	NA	NP_653304-AN1-3-chr20_143_119_144	NP_653304-AN1-3-chr20-60701495-60702640-stop222-whim12	2	2	LSM14B	21.11	21.8	6	235	143	AN1	frameshift-truncation	+	143	221	119		(R)	GMAPYGPLAASSLLSQQYAASLGLEK	(L)
0.009	-0.103	-0.009	-0.316	-0.01	NA	NA	NA	NA	NA	0.453	0.689	0.433	0.405	0.565	NA	NA	NA	NA	NA	NA	NA	NA	NA	NA	NA	NA	NA	NA	NA	NP_001073898-A-4-6_208_192_215	NP_001073898-A-4-6-chr19-7671457-7672706-33-variant-whim30	2	3	CAMSAP3	20.62	20.62		0	208	ISED	inframe-splice-exon-deletion	+			192		(R)	ASPAAPADGAAPAQPSHAIAFCLK	(E)
NA	NA	NA	NA	NA	1.907	1.468	1.606	1.964	1.541	NA	NA	NA	NA	NA	-0.807	-0.7075	-0.354	-0.601	-0.441	NA	NA	NA	NA	NA	NA	NA	NA	NA	NA	NP_001265868-A-19-21_384_383_393	NP_001265868-A-19-21-chr7-73469099-73471001-165-whim2	2	4	ELN	20.35	20.35		0	384	ISED	inframe-splice-exon-deletion	+			383		(K)	YAEAQAAAAAK	(A)
NA	NA	NA	NA	NA	NA	NA	NA	NA	NA	0.023	0.209	-0.059	0.008	0.04	0.692	0.6895	0.49	0.648	0.24	NA	NA	NA	NA	NA	NA	NA	NA	NA	NA	NP_001005271-AN1-36-chr17_1858_2014_2024	NP_001005271-AN1-36-chr17-7812147-7812598-stop2054-whim30	2	2	CHD3	11.63	11.63	1	2	1858	AN1	frameshift-truncation	+	1858	2053	2014		(R)	LTGSQACPSPR	(P)
NA	NA	NA	NA	NA	NA	NA	NA	NA	NA	0.142	0.273	0.141	0.039	0.064	-0.346	-0.3585	-0.03	-0.091	-0.278	NA	NA	NA	NA	NA	NA	NA	NA	NA	NA	NP_005959-A-10-12_335_323_347	NP_005959-A-10-12-chr19-8536311-8539050-45-whim12	2	2	HNRNPM	18.11	18.11		0	335	ISED	inframe-splice-exon-deletion	+			323		(K)	GIGMGNIGPAGMEGPFGGGMENMGR	(F)
0.063	0.16	0.241	-0.187	0.218	NA	NA	NA	NA	NA	NA	NA	NA	NA	NA	0.483	0.2145	0.382	0.185	0.044	NA	NA	NA	NA	NA	NA	NA	NA	NA	NA	NP_036288-AN1-16-chr20_757_739_760	NP_036288-AN1-16-chr20-34802362-34806800-stop820-whim12	2	2	EPB41L1	17.8	17.8	5	8	757	AN1	frameshift-truncation	+	757	819	739		(R)	EFIATTPSITTETISTTMNSLK	(S)
NA	NA	NA	NA	NA	NA	NA	NA	NA	NA	0.223	0.367	0.519	0.085	0.267	0.393	0.4525	0.219	0.145	0.159	NA	NA	NA	NA	NA	NA	NA	NA	NA	NA	NP_057657-A-7-9_443_434_458	NP_057657-A-7-9-chr19-19746378-19747515-78-whim12	2	2	GMIP	17.73	17.73		0	443	ISED	inframe-splice-exon-deletion	-			434		(R)	SLDSPTSSPDLGDGLENGLGSPFGK	(W)
NA	NA	NA	NA	NA	0.322	0.358	0.347	0.576	0.366	NA	NA	NA	NA	NA	NA	NA	NA	NA	NA	0.686	0.689	0.585	0.824	0.602	NA	NA	NA	NA	NA	NP_055446-A-7-9_143_142_163	NP_055446-A-7-9-chr10-105420872-105452785-45-whim12	2	3	SH3PXD2A	17.56	17.56		0	143	ISED	inframe-splice-exon-deletion	-			142		(K)	SGADATAEPMILEQYVVVSNYK	(K)
NA	NA	NA	NA	NA	NA	NA	NA	NA	NA	NA	NA	NA	NA	NA	NA	NA	NA	NA	NA	NA	NA	NA	NA	NA	0.476	0.277	0.435	0.486	0.733	NP_071909-A-3-5_216_271_288	NP_071909-A-3-5-chr5-138287573-138362489-122-stop310-whim12	2	2	SIL1	17.5	17.5	4	10	216	A	frameshift-truncation	-	216	309	271		(R)	GAAGPEDPGAGEGHGGAR	(R)
NA	NA	NA	NA	NA	NA	NA	NA	NA	NA	NA	NA	NA	NA	NA	NA	NA	NA	NA	NA	0.128	-0.088	-0.149	-0.032	0.103	NA	NA	NA	NA	NA	NP_872579-AN1-24-chr17_2761_2780_2790	NP_872579-AN1-24-chr17-65955991-65959448-stop2813-whim12	2	2	BPTF	17.35	17.35	6	234	2761	AN1	frameshift-truncation	+	2761	2812	2780		(K)	KMDVYICNDCK	(R)
NA	NA	NA	NA	NA	NA	NA	NA	NA	NA	0.085	0.333	0.202	0.366	0.085	0.908	0.9415	0.208	0.91	0.089	NA	NA	NA	NA	NA	NA	NA	NA	NA	NA	NP_004915-AN1-18-chr19_780_781_791	NP_004915-AN1-18-chr19-39217743-39218955-stop866-whim12	2	2	ACTN4	9.31	9.31	6	59	780	AN1	frameshift-truncation	+	780	865	781		(K)	QTGSMDSDDFR	(A)
1.074	0.774	0.912	0.75	0.984	NA	NA	NA	NA	NA	0.288	0.394	0.087	0.227	0.104	NA	NA	NA	NA	NA	NA	NA	NA	NA	NA	NA	NA	NA	NA	NA	NP_001138984-AN1-8-chr1_404_407_418	NP_001138984-AN1-8-chr1-61849037-61851542-stop436-whim2	2	2	NFIA	17.02	17.02	4	6	404	AN1	frameshift-truncation	+	404	435	407		(K)	MAPSILGSPFWK	(V)
-0.067	-0.025	0.175	0.036	0.164	-0.387	-0.105	0.097	-0.285	-0.13	NA	NA	NA	NA	NA	NA	NA	NA	NA	NA	NA	NA	NA	NA	NA	NA	NA	NA	NA	NA	NP_694587-AN1-6-chr6_192_240_250	NP_694587-AN1-6-chr6-18186041-18188022-stop279-whim12	2	2	KDM1B	17.01	14.09	5	113	192	AN1	frameshift-truncation	+	192	278	240		(R)	AAATGNASPGK	(L)
NA	NA	NA	NA	NA	0.1	0.124	0.145	0.213	0.24	NA	NA	NA	NA	NA	0.067	0.2595	0.371	0.082	0.34	NA	NA	NA	NA	NA	NA	NA	NA	NA	NA	NP_056193-AN1-38-chr1_2851_2835_2851	NP_056193-AN1-38-chr1-12395884-12401839-stop2907-whim12	2	2	VPS13D	16.49	16.49	4	111	2851	AN1	frameshift-truncation	+	2851	2906	2835		(K)	SEDWMGSSVDPPCFGQK	(V)
NA	NA	NA	NA	NA	NA	NA	NA	NA	NA	0.169	-0.013	0.042	0.179	0.067	0.483	0.5375	0.358	0.579	0.328	NA	NA	NA	NA	NA	NA	NA	NA	NA	NA	NP_005564-AN1-3-chr5_215_210_219	NP_005564-AN1-3-chr5-126141388-126145874-stop272-whim12	2	2	LMNB1	16.42	13.58	3	19	215	AN1	frameshift-truncation	+	215	271	210		(K)	SMYEEINETR	(R)
0.076	-0.016	-0.01	0.085	0.002	NA	NA	NA	NA	NA	NA	NA	NA	NA	NA	0.022	0.1015	-0.058	-0.058	-0.146	NA	NA	NA	NA	NA	NA	NA	NA	NA	NA	NP_054706-A-6-9_262_247_262	NP_054706-A-6-9-chr10-75834661-75848953-239-stop334-whim30	2	2	VCL	16.38	10.65	1	2	262	A	frameshift-truncation	+	262	333	247		(R)	VLQLTSWDEDAWASKR	(T)
NA	NA	NA	NA	NA	-2.322	-2.209	-2.02	-2.064	-2.322	1.242	1.166	1.107	1.317	1.074	NA	NA	NA	NA	NA	NA	NA	NA	NA	NA	NA	NA	NA	NA	NA	NP_001229861-A-2-4_193_189_200	NP_001229861-A-2-4-chr11-1901454-1904648-165-whim2	2	2	LSP1	16.01	16.01		0	193	ISED	inframe-splice-exon-deletion	+			189		(K)	QEMLPGLHAYEK	(E)
NA	NA	NA	NA	NA	-0.1	0.14	0.157	0.393	0.139	NA	NA	NA	NA	NA	0.007	0.1905	0.167	-0.614	0.118	NA	NA	NA	NA	NA	NA	NA	NA	NA	NA	NP_001684-AN1-11-chr8_388_397_409	NP_001684-AN1-11-chr8-20074006-20074703-stop457-whim2	2	2	ATP6V1B2	15.3	15.3	1	3	388	AN1	frameshift-truncation	+	388	456	397		(K)	IYPPINVLPSLSR	(L)
0.602	0.585	0.496	0.571	1.199	NA	NA	NA	NA	NA	NA	NA	NA	NA	NA	0.849	0.7555	0.611	0.638	0.32	NA	NA	NA	NA	NA	NA	NA	NA	NA	NA	NP_001007-AN1-4-chr6_113_103_113	NP_001007-AN1-4-chr6-133138200-133138588-stop143-whim2	2	2	RPS12	15.15	11.19	1	12	113	AN1	insertion	+	113	121	103		(K)	VVGCSCVVVKK	(L)
0.14	0.14	0.085	-0.369	0.215	NA	NA	NA	NA	NA	NA	NA	NA	NA	NA	0.395	0.5895	0.426	0.441	0.392	NA	NA	NA	NA	NA	NA	NA	NA	NA	NA	NP_036288-A-16-19_757_739_759	NP_036288-A-16-19-chr20-34802362-34809785-171-whim2	2	2	EPB41L1	15.01	15.01		0	757	ISED	inframe-splice-exon-deletion	+			739		(R)	EFIATTPSITTETISTTMTVK	(G)
0.332	0.386	0.189	-0.408	0.541	NA	NA	NA	NA	NA	NA	NA	NA	NA	NA	-0.493	-0.4965	0.199	-0.377	0.351	NA	NA	NA	NA	NA	NA	NA	NA	NA	NA	NP_059980-AN1-3-chr5_138_152_160	NP_059980-AN1-3-chr5-177020776-177021160-stop190-whim12	2	2	TMED9	14.83	3.52	2	3	138	AN1	frameshift-truncation	+	138	189	152		(K)	DKLSELQLR	(V)
NA	NA	NA	NA	NA	NA	NA	NA	NA	NA	NA	NA	NA	NA	NA	-0.448	-0.4625	-0.277	-0.489	-0.373	-1.155	-0.978	-1.16	-1.245	-1.07	NA	NA	NA	NA	NA	NP_001027460-AN2-2-chrX_143_304_314	NP_001027460-AN2-2-chrX-48762537-48763668-stop320-whim6	2	4	SLC35A2	14.69	10.95	1	2	143	AN2	frameshift-extension	-	143	319	304		(R)	GDLITEPFLPK	(S)
0.021	-0.017	-0.028	-0.253	0.058	NA	NA	NA	NA	NA	NA	NA	NA	NA	NA	-0.257	-0.4405	-0.042	-0.302	-0.167	NA	NA	NA	NA	NA	NA	NA	NA	NA	NA	NP_115672-AN1-1-chr16_110_106_118	NP_115672-AN1-1-chr16-2980011-2980410-stop371-whim12	2	2	FLYWCH1	14.38	14.38	6	93	110	AN1	frameshift-truncation	+	110	370	106		(K)	LDAAAPQSLEFLR	(T)
NA	NA	NA	NA	NA	NA	NA	NA	NA	NA	NA	NA	NA	NA	NA	0.17	0.1655	0.372	-0.015	0.285	NA	NA	NA	NA	NA	0.721	0.838	0.924	0.716	0.672	NP_612480-AN1-5-chr11_312_316_328	NP_612480-AN1-5-chr11-63586474-63594437-stop343-whim12	2	2	C11orf84	13.31	10.92	5	27	312	AN1	frameshift-truncation	+	312	342	316		(R)	ADGGAPSGQPPAR	(L)
0.518	0.78	0.689	0.422	0.685	NA	NA	NA	NA	NA	-0.547	-0.728	-0.869	-0.74	-0.822	NA	NA	NA	NA	NA	NA	NA	NA	NA	NA	NA	NA	NA	NA	NA	NP_079100-A-8-10_375_369_379	NP_079100-A-8-10-chr14-89042284-89063077-156-variant-whim30	2	2	ZC3H14	13.24	9.63		0	375	ISED	inframe-splice-exon-deletion	+			369		(K)	TTNYSTGTQQR	(Q)
NA	NA	NA	NA	NA	NA	NA	NA	NA	NA	NA	NA	NA	NA	NA	NA	NA	NA	NA	NA	-0.078	-0.06	0.007	-0.153	-0.168	0.226	0.427	0.449	0.351	0.392	NP_001182070-AN1-17-chr5_955_970_978	NP_001182070-AN1-17-chr5-149759295-149762609-stop1044-whim2	2	2	TCOF1	13.23	8.06	1	1	955	AN1	frameshift-truncation	+	955	1043	970		(K)	TLAPAPPER	(N)
NA	NA	NA	NA	NA	NA	NA	NA	NA	NA	0.245	0.373	0.339	0.358	0.429	0.665	0.8235	0.803	0.469	0.713	NA	NA	NA	NA	NA	NA	NA	NA	NA	NA	NP_996735-AN1-5-chr6_213_211_219	NP_996735-AN1-5-chr6-163983101-163984475-stop319-whim12	2	3	QKI	13.19	6.15	5	79	213	AN1	frameshift-truncation	+	213	318	211		(K)	SPTAQAAPR	(I)
-0.128	0.171	0.094	-0.232	-0.063	NA	NA	NA	NA	NA	NA	NA	NA	NA	NA	-0.106	-0.0215	-0.111	-0.238	-0.183	NA	NA	NA	NA	NA	NA	NA	NA	NA	NA	NP_004717-A-11-14_447_439_447	NP_004717-A-11-14-chrX-17088116-17121840-183-whim12	2	2	REPS2	12.91	12.91		0	447	ISED	inframe-splice-exon-deletion	+			439		(K)	DVSEDPATK	(S)
NA	NA	NA	NA	NA	NA	NA	NA	NA	NA	-0.213	-0.172	-0.261	0.386	-0.028	NA	NA	NA	NA	NA	NA	NA	NA	NA	NA	-0.654	-0.996	-0.538	-2.366	0.062	NP_004703-AN1-12-chr17_326_292_326	NP_004703-AN1-12-chr17-79661883-79661989-stop380-whim30	2	3	HGS	12.62	12.62	1	1	326	AN1	frameshift-truncation	+	326	379	292		(K)	AEPMPSASSAPPASSLYSSPVNSSAPLAEDIDPEK	(Q)
NA	NA	NA	NA	NA	NA	NA	NA	NA	NA	NA	NA	NA	NA	NA	NA	NA	NA	NA	NA	-0.075	0.459	0.434	0.328	-0.117	-0.4	0.172	0.481	0.142	0.431	NP_001307-AN1-3-chr20_111_110_122	NP_001307-AN1-3-chr20-47682830-47682988-stop134-whim2	2	2	CSE1L	12.61	12.61	1	3	111	AN1	frameshift-truncation	+	111	133	110		(K)	QSGDFHVINGVLR	(T)
0.561	0.621	0.593	0.341	0.579	NA	NA	NA	NA	NA	NA	NA	NA	NA	NA	NA	NA	NA	NA	NA	NA	NA	NA	NA	NA	-1.821	-1.844	-1.709	-1.833	-2.15	NP_001035089-AN1-2-chr6_102_91_103	NP_001035089-AN1-2-chr6-168265426-168271062-stop144-whim12	2	2	MLLT4	12.56	12.56	6	279	102	AN1	frameshift-truncation	+	102	143	91		(K)	YSLYEVHVSGEER	(R)
NA	NA	NA	NA	NA	NA	NA	NA	NA	NA	0.544	0.471	0.438	0.66	0.438	NA	NA	NA	NA	NA	-0.106	-0.335	-0.352	-0.39	-0.165	NA	NA	NA	NA	NA	NP_055157-A-9-11_94_91_102	NP_055157-A-9-11-chr11-47656286-47660250-27-whim12	2	3	MTCH2	12.5	13.62		0	94	ISED	inframe-splice-exon-deletion	-			91		(K)	VLQELGPGNVQK	(E)
NA	NA	NA	NA	NA	NA	NA	NA	NA	NA	NA	NA	NA	NA	NA	-0.991	-0.8055	0.509	-1.203	0.263	NA	NA	NA	NA	NA	-0.197	0.41	0.714	0.244	0.859	NP_001008749-AN1-1-chr7_68_68_76	NP_001008749-AN1-1-chr7-140107647-140111679-stop129-whim2	2	2	RAB19	12.32	9.96	1	1	68	AN1	frameshift-truncation	+	68	128	68		(K)	VWDTAGQER	(F)
NA	NA	NA	NA	NA	1.174	1.311	0.984	1.413	1.235	NA	NA	NA	NA	NA	-1.569	-0.9645	1.002	-1.501	0.486	NA	NA	NA	NA	NA	NA	NA	NA	NA	NA	NP_789845-A-8-11_75_74_85	NP_789845-A-8-11-chr4-106367659-106377837-99-whim2	2	2	PPA2	12.12	12.12		0	75	ISED	inframe-splice-exon-deletion	-			74		(K)	EIATKEPMNPIK	(Q)
NA	NA	NA	NA	NA	NA	NA	NA	NA	NA	NA	NA	NA	NA	NA	-0.016	0.0495	0.033	0.084	-0.37	-0.244	0.099	0.15	0.077	-0.334	NA	NA	NA	NA	NA	NP_001070676-AN2-8-chr4_835_826_835	NP_001070676-AN2-8-chr4-83766447-83769956-stop836-whim12	2	2	SEC31A	11.86	11.86	6	115	835	AN2	frameshift-truncation	-	835	835	826		(R)	VQTQQYYPHG	(-)
NA	NA	NA	NA	NA	0.079	0.101	0.111	0.169	0.122	NA	NA	NA	NA	NA	NA	NA	NA	NA	NA	-0.576	-0.357	-0.256	-0.084	-0.446	NA	NA	NA	NA	NA	NP_005886-A-21-23_46_43_55	NP_005886-A-21-23-chr12-133390005-133398581-273-whim2	2	2	GOLGA3	11.66	11.66		0	46	ISED	inframe-splice-exon-deletion	-			43		(K)	VQCSTDSPLPLEK	(E)
NA	NA	NA	NA	NA	NA	NA	NA	NA	NA	NA	NA	NA	NA	NA	0.033	0.0305	0.143	-0.032	0.073	0.175	0.241	0.175	0.143	0.168	NA	NA	NA	NA	NA	NP_891553-AN1-12-chr14_551_553_560	NP_891553-AN1-12-chr14-104145882-104159889-stop572-whim12	2	2	KLC1	11.61	6.63	1	5	551	AN1	frameshift-truncation	+	551	571	553		(R)	NNCLADSR	(A)
NA	NA	NA	NA	NA	-0.088	0.878	0.091	0.51	-0.21	NA	NA	NA	NA	NA	0.491	0.3805	0.532	0.258	0.666	NA	NA	NA	NA	NA	NA	NA	NA	NA	NA	NP_006303-AN2-6-chr12_2252_2245_2252	NP_006303-AN2-6-chr12-124817011-124817675-stop2297-whim12	2	2	NCOR2	11.55	6.31	6	189	2252	AN2	frameshift-truncation	-	2252	2295	2245		(R)	DGEQTEPR	(D)
0.199	0.218	0.403	0.071	0.309	NA	NA	NA	NA	NA	0.012	0.049	-0.26	0.09	0.094	NA	NA	NA	NA	NA	NA	NA	NA	NA	NA	NA	NA	NA	NA	NA	NP_113663-AN1-10-chr1_776_1058_1067	NP_113663-AN1-10-chr1-6512156-6514493-stop1363-whim2	2	2	ESPN	11.45	3.9	2	19	776	AN1	frameshift-extension	+	776	1362	1058		(R)	IVYLFLEHWR	(R)
NA	NA	NA	NA	NA	NA	NA	NA	NA	NA	0.044	0.173	0.147	0.114	-0.075	-0.201	-0.1635	0.299	-0.391	0.336	NA	NA	NA	NA	NA	NA	NA	NA	NA	NA	NP_061155-AN1-20-chr7_962_970_979	NP_061155-AN1-20-chr7-36466637-36467915-stop987-whim12	2	3	ANLN	11.3	6.35	6	103	962	AN1	frameshift-truncation	+	962	986	970		(R)	ELLGYLFQEK	(V)
NA	NA	NA	NA	NA	NA	NA	NA	NA	NA	0.713	0.595	0.813	0.66	0.879	0.756	0.5725	0.619	0.669	0.718	NA	NA	NA	NA	NA	NA	NA	NA	NA	NA	NP_775855-AN1-3-chr11_153_243_256	NP_775855-AN1-3-chr11-829540-829967-stop295-whim2	2	2	EFCAB4A	11.21	7.58	2	13	153	AN1	frameshift-substitution	+	153	294	243		(R)	GAEKPSGAGAAEPR	(A)
NA	NA	NA	NA	NA	NA	NA	NA	NA	NA	NA	NA	NA	NA	NA	NA	NA	NA	NA	NA	NA	NA	NA	NA	NA	NA	NA	NA	NA	NA	NP_057068-AN2-7-chr1_147_146_153	NP_057068-AN2-7-chr1-192998436-192998517-stop329-whim2	2	2	UCHL5	11.2	11.2	1	2	147	AN2	deletion-short3	-	147	147	146		(R)	QMFEFDTK	(T)
0.066	-0.005	0.086	-0.089	0.136	NA	NA	NA	NA	NA	NA	NA	NA	NA	NA	-0.266	-0.2125	-0.136	-0.121	-0.175	NA	NA	NA	NA	NA	NA	NA	NA	NA	NA	NP_689929-A-12-14_242_232_246	NP_689929-A-12-14-chr11-59423213-59423971-90-whim12	2	2	PATL1	10.95	10.95		0	242	ISED	inframe-splice-exon-deletion	-			232		(R)	MSPNQLCSVPLQPGR	(M)
NA	NA	NA	NA	NA	NA	NA	NA	NA	NA	-0.534	-0.252	-0.226	-0.349	-0.315	0.063	0.0515	0.245	0.084	0.338	NA	NA	NA	NA	NA	NA	NA	NA	NA	NA	NP_904325-AN1-11-chr1_388_379_390	NP_904325-AN1-11-chr1-10338186-10342379-stop466-whim12	2	2	KIF1B	10.93	8.79	4	40	388	AN1	frameshift-truncation	+	388	465	379		(R)	AQGLGDIIDNLK	(D)
-0.308	-0.966	-0.941	-0.792	-0.593	NA	NA	NA	NA	NA	NA	NA	NA	NA	NA	NA	NA	NA	NA	NA	NA	NA	NA	NA	NA	-0.975	-0.435	-0.962	-1.255	-1.107	NP_001605-AN2-3-chr17_269_257_284	NP_001605-AN2-3-chr17-79478085-79478213-stop309-whim30	2	2	ACTG1	10.88	8.22	1	4	269	AN2	frameshift-truncation	-	269	308	257		(R)	CPEALFQPSFLGVTWTSAKTCTPTRCCR	(A)
0.497	0.431	0.593	0.495	0.882	NA	NA	NA	NA	NA	-0.165	-0.288	-0.335	-0.353	-0.175	NA	NA	NA	NA	NA	NA	NA	NA	NA	NA	NA	NA	NA	NA	NA	NP_005299-A-6-9_179_179_186	NP_005299-A-6-9-chr10-121184597-121196162-205-stop195-whim30	2	2	GRK5	10.25	6.68	1	2	179	A	frameshift-truncation	+	179	194	179		(R)	STWPMPTR	(P)
NA	NA	NA	NA	NA	NA	NA	NA	NA	NA	0.662	0.521	0.548	0.76	0.566	NA	NA	NA	NA	NA	0.312	0.182	0.051	0.208	0.234	NA	NA	NA	NA	NA	NP_006504-AN1-9-chr1_420_432_440	NP_006504-AN1-9-chr1-109779170-109779426-stop517-whim12	2	2	SARS	10.03	1.05	6	13	420	AN1	frameshift-extension	+	420	516	432		(K)	LEASLFSPK	(K)
NA	NA	NA	NA	NA	NA	NA	NA	NA	NA	NA	NA	NA	NA	NA	0.422	0.3425	0.394	0.435	0.544	-0.049	0.055	-0.076	0.202	-0.023	NA	NA	NA	NA	NA	NP_891553-AN1-11-chr14_497_498_505	NP_891553-AN1-11-chr14-104143860-104145645-stop601-whim12	2	2	KLC1	9.93	9.93	6	92	497	AN1	frameshift-extension	+	497	600	498		(R)	SISEIPKK	(I)
NA	NA	NA	NA	NA	NA	NA	NA	NA	NA	NA	NA	NA	NA	NA	-0.242	-0.0805	-0.145	-0.156	-0.09	NA	NA	NA	NA	NA	0.549	0.452	0.537	0.633	0.584	NP_005099-AN1-2-chr3_48_42_66	NP_005099-AN1-2-chr3-38390123-38397232-stop67-whim30	2	2	XYLB	9.89	6	1	5	48	AN1	frameshift-truncation	+	48	64	42		(R)	DLPEFGATLEAHVEHDRATINLVPE	(-)
1.446	1.196	1.128	0.596	1.312	1.478	0.032	1.465	-0.408	-0.837	NA	NA	NA	NA	NA	NA	NA	NA	NA	NA	NA	NA	NA	NA	NA	NA	NA	NA	NA	NA	NP_062559-AN2-5-chr17_209_212_231	NP_062559-AN2-5-chr17-80576957-80579484-stop244-whim12	2	2	WDR45B	9.84	3.69	1	1	209	AN2	frameshift-truncation	-	209	243	212		(R)	ISSSQYLLHQLQSGCVPHLR	(I)
0.554	0.318	0.509	0.221	0.542	0.512	0.647	0.591	0.728	0.689	NA	NA	NA	NA	NA	NA	NA	NA	NA	NA	NA	NA	NA	NA	NA	NA	NA	NA	NA	NA	NP_006380-AN2-8-chr11_752_739_756	NP_006380-AN2-8-chr11-118919077-118919187-stop767-whim2	2	3	HYOU1	9.83	9.83	3	11	752	AN2	frameshift-truncation	-	752	766	739		(K)	AANSLEAFIFETQAVPAR	(V)
NA	NA	NA	NA	NA	NA	NA	NA	NA	NA	0.237	0.217	0.507	0.044	0.143	-0.056	0.0555	0.154	0.09	0.24	NA	NA	NA	NA	NA	NA	NA	NA	NA	NA	NP_005330-AN1-2-chr4_54_62_79	NP_005330-AN1-2-chr4-39739133-39744911-stop89-whim2	2	2	UBE2K	9.72	9.72	2	4	54	AN1	frameshift-truncation	+	54	88	62		(K)	NRPGAVAHACNPSSLGGR	(G)
NA	NA	NA	NA	NA	0.787	0.483	0.584	0.503	0.536	NA	NA	NA	NA	NA	NA	NA	NA	NA	NA	NA	NA	NA	NA	NA	0.145	0.402	0.362	0.241	0.646	NP_001542-A-1-3_63_52_63	NP_001542-A-1-3-chrX-69353985-69366482-294-whim30	2	3	IGBP1	9.59	5.18		0	63	ISED	inframe-splice-exon-deletion	+			52	M55m	(K)	AAEmLSQLDLFR	(Y)
0.396	0.339	0.441	0.118	0.479	NA	NA	NA	NA	NA	NA	NA	NA	NA	NA	NA	NA	NA	NA	NA	-0.492	-1.109	-0.551	-0.318	-0.831	NA	NA	NA	NA	NA	NP_001180309-AN1-13-chr3_433_600_614	NP_001180309-AN1-13-chr3-9955708-9956085-stop717-whim2	2	2	IL17RE	9.26	4.75	4	14	433	AN1	frameshift-extension	+	433	715	600		(R)	EQGTVLLLWSGADLR	(P)
NA	NA	NA	NA	NA	NA	NA	NA	NA	NA	NA	NA	NA	NA	NA	-0.167	-0.0255	-0.322	-0.048	-0.356	-0.173	0.002	-0.182	-0.136	-0.22	NA	NA	NA	NA	NA	NP_004610-A-3-7_128_120_128	NP_004610-A-3-7-chr1-211529810-211538717-318-whim2	2	2	TRAF5	8.95	4.2		0	128	ISED	inframe-splice-exon-deletion	+			120		(K)	VILGRYQDK	(R)
NA	NA	NA	NA	NA	NA	NA	NA	NA	NA	NA	NA	NA	NA	NA	NA	NA	NA	NA	NA	0.257	0.239	0.256	0.437	-0.024	0.42	0.592	0.359	0.638	0.448	NP_001158886-AN1-2-chr11_72_80_91	NP_001158886-AN1-2-chr11-18418515-18424415-stop143-whim2	2	2	LDHA	8.9	8.9	1	2	72	AN1	frameshift-truncation	+	72	142	80		(R)	VIGSGCNLDSAR	(F)
NA	NA	NA	NA	NA	NA	NA	NA	NA	NA	0.125	-0.217	0.103	0.196	0.784	NA	NA	NA	NA	NA	-0.42	-0.442	-0.304	-0.312	-0.707	NA	NA	NA	NA	NA	NP_036223-A-2-5_349_344_353	NP_036223-A-2-5-chr16-75637069-75646140-246-variant-whim30	2	2	ADAT1	8.74	4.37		0	349	ISED	inframe-splice-exon-deletion	-			344		(R)	ALIGRSQISK	(V)
NA	NA	NA	NA	NA	NA	NA	NA	NA	NA	-0.422	-0.24	-0.707	-0.577	-0.975	NA	NA	NA	NA	NA	0.138	-0.386	-0.58	-0.594	0.064	NA	NA	NA	NA	NA	NP_055787-A-15-17_574_582_593	NP_055787-A-15-17-chr16-89972692-89976998-80-stop643-whim2	2	2	TCF25	8.7	4.07	5	19	574	A	frameshift-truncation	+	574	642	582		(K)	HHCSLLPVTVAK	(L)
NA	NA	NA	NA	NA	NA	NA	NA	NA	NA	0.118	0.257	0.11	0.06	0.035	NA	NA	NA	NA	NA	NA	NA	NA	NA	NA	0.602	0.401	0.515	0.504	0.408	NP_002793-AN1-10-chr14_397_388_397	NP_002793-AN1-10-chr14-90736696-90738629-stop400-whim2	2	2	PSMC1	8.54	2.22	1	1	397	AN1	frameshift-truncation	+	397	399	388		(K)	DDLSGADIKK	(L)
0.699	0.619	0.496	0.467	0.613	NA	NA	NA	NA	NA	NA	NA	NA	NA	NA	0.092	0.2135	0.076	0.189	0.102	NA	NA	NA	NA	NA	NA	NA	NA	NA	NA	NP_001138820-A-4-6_305_300_309	NP_001138820-A-4-6-chr16-27226329-27230281-45-whim12	2	2	KDM8	8.45	8.24		0	305	ISED	inframe-splice-exon-deletion	+			300		(K)	YIVNEIPELK	(Q)
NA	NA	NA	NA	NA	-0.565	-0.264	-0.477	-0.253	-0.416	-2.24	-2.359	-2.097	-2.224	-2.262	NA	NA	NA	NA	NA	NA	NA	NA	NA	NA	NA	NA	NA	NA	NA	NP_002568-AN1-1-chr3_64_63_70	NP_002568-AN1-1-chr3-196509704-196510260-stop94-whim2	2	2	PAK2	8.45	2.69	1	2	64	AN1	frameshift-truncation	+	64	93	63		(K)	GTYPLGAK	(L)
0.023	0.017	-0.289	-0.117	0.11	NA	NA	NA	NA	NA	NA	NA	NA	NA	NA	0.014	0.3655	0.33	0.061	0.005	NA	NA	NA	NA	NA	NA	NA	NA	NA	NA	NP_444505-AN2-5-chr12_108_107_120	NP_444505-AN2-5-chr12-120636761-120636920-stop304-whim2	2	2	RPLP0	8.45	8.45	1	1	108	AN2	deletion	-	108	108	107		(K)	VTVPAQNTGLGPEK	(T)
0.258	0.143	0.33	-0.174	0.204	NA	NA	NA	NA	NA	NA	NA	NA	NA	NA	NA	NA	NA	NA	NA	-0.006	-0.47	-0.585	-0.784	-0.163	NA	NA	NA	NA	NA	NP_060184-AN2-11-chr20_95_76_97	NP_060184-AN2-11-chr20-13600402-13604092-stop115-whim2	2	2	TASP1	8.35	6.41	1	1	95	AN2	frameshift-truncation	-	95	114	76		(K)	LQAGALATDAVTAALVELEAEK	(I)
NA	NA	NA	NA	NA	NA	NA	NA	NA	NA	NA	NA	NA	NA	NA	NA	NA	NA	NA	NA	0.247	0.159	0.247	0.293	0.168	NA	NA	NA	NA	NA	NP_060272-AN1-12-chr7_811_879_892	NP_060272-AN1-12-chr7-819781-821681-stop1170-whim2	2	2	HEATR2	8.24	4.78	3	2	811	AN1	frameshift-extension	+	811	1169	879		(R)	IFAAWPPPDTRHQK	(L)
0.155	0.001	0.073	-0.269	0.023	NA	NA	NA	NA	NA	0.05	0.301	0.206	-0.082	0.018	NA	NA	NA	NA	NA	NA	NA	NA	NA	NA	NA	NA	NA	NA	NA	NP_055267-AN2-4-chr6_416_433_446	NP_055267-AN2-4-chr6-47244004-47251673-stop450-whim30	2	2	TNFRSF21	8.17	8.17	1	4	416	AN2	frameshift-truncation	-	416	449	433	C433c	(R)	cTCHVPATTHLFAK	(L)
NA	NA	NA	NA	NA	-0.045	-0.056	-0.133	0.083	0.057	NA	NA	NA	NA	NA	NA	NA	NA	NA	NA	0.36	0.393	0.312	0.456	0.446	NA	NA	NA	NA	NA	NP_060700-AN2-6-chr1_994_1015_1022	NP_060700-AN2-6-chr1-229588601-229593907-stop1034-whim30	2	2	NUP133	8.13	3.19	1	1	994	AN2	frameshift-truncation	-	994	1033	1015		(K)	SILRSLNK	(D)
-0.041	-0.195	-0.276	-0.096	-0.271	NA	NA	NA	NA	NA	NA	NA	NA	NA	NA	-0.081	-0.0815	-0.141	-0.361	-0.143	NA	NA	NA	NA	NA	NA	NA	NA	NA	NA	NP_002296-AN1-2-chr22_31_30_40	NP_002296-AN1-2-chr22-38073072-38074516-stop115-whim2	2	2	LGALS1	8.11	8.11	2	8	31	AN1	frameshift-truncation	+	31	114	30		(K)	SNNLCLHFNPR	(F)
-0.277	-0.457	-0.533	-0.356	-0.199	NA	NA	NA	NA	NA	0.152	-0.148	-0.32	0.054	0.32	NA	NA	NA	NA	NA	NA	NA	NA	NA	NA	NA	NA	NA	NA	NA	NP_689758-AN2-11-chr4_147_141_151	NP_689758-AN2-11-chr4-82373589-82377804-stop155-whim30	2	2	RASGEF1B	8.03	5.98	1	1	147	AN2	frameshift-truncation	-	147	154	141		(R)	IASGEEVNFSK	(I)
NA	NA	NA	NA	NA	0.297	0.078	0.299	0.174	-0.24	NA	NA	NA	NA	NA	NA	NA	NA	NA	NA	-0.772	-1.405	-0.916	-1.425	-0.594	NA	NA	NA	NA	NA	NP_001138233-AN2-16-chr19_92_132_155	NP_001138233-AN2-16-chr19-3025105-3027826-stop220-whim12	2	2	TLE2	7.97	5.32	1	1	92	AN2	frameshift-truncation	-	92	219	132		(R)	QAGHRGGAEQPHRAAAAPAAVPPR	(T)
NA	NA	NA	NA	NA	NA	NA	NA	NA	NA	NA	NA	NA	NA	NA	NA	NA	NA	NA	NA	-0.033	-2.032	-1.374	-1.916	-0.231	0.304	0.579	0.214	0.558	0.901	NP_031361-AN1-22-chr3_1088_1103_1114	NP_031361-AN1-22-chr3-38151053-38151580-stop1207-whim30	2	2	DLEC1	7.88	4.32	1	6	1088	AN1	frameshift-truncation	+	1088	1206	1103		(R)	LDFGSAVPLRTR	(V)
NA	NA	NA	NA	NA	0.631	0.169	0.227	0.302	-0.115	NA	NA	NA	NA	NA	-0.41	-0.5865	1.4	-0.661	1.08	NA	NA	NA	NA	NA	NA	NA	NA	NA	NA	NP_690618-AN1-15-chr2_631_630_642	NP_690618-AN1-15-chr2-234358022-234358604-stop1223-whim2	2	2	DGKD	7.79	7.79	3	8	631	AN1	insertion	+	631	686	630	M640m	(K)	AAHTLLAQLSmSR	(M)
NA	NA	NA	NA	NA	NA	NA	NA	NA	NA	-0.163	-0.373	-0.293	-0.239	-0.266	NA	NA	NA	NA	NA	0.053	-0.346	-0.351	-0.682	0.052	NA	NA	NA	NA	NA	NP_001136082-AN2-18-chr17_263_273_282	NP_001136082-AN2-18-chr17-19729525-19741813-stop285-whim6	2	3	ULK2	7.72	3.47	1	1	263	AN2	frameshift-truncation	-	263	284	273		(K)	HFLAILFLSK	(V)
NA	NA	NA	NA	NA	0.25	0.234	0.482	0.772	0.287	NA	NA	NA	NA	NA	-0.435	-0.2375	0.308	-0.645	0.018	NA	NA	NA	NA	NA	NA	NA	NA	NA	NA	NP_004890-AN1-6-chr2_227_239_248	NP_004890-AN1-6-chr2-28352247-28375342-stop249-whim2	2	2	BRE	7.64	5.84	1	1	227	AN1	frameshift-truncation	+	227	248	239		(R)	RSWESSSVLL	(-)
0.395	0.193	0.432	0.139	0.362	-0.041	-0.439	-0.015	-0.447	-0.655	NA	NA	NA	NA	NA	NA	NA	NA	NA	NA	NA	NA	NA	NA	NA	NA	NA	NA	NA	NA	NP_079526-AN1-8-chr7_310_330_341	NP_079526-AN1-8-chr7-2691876-2695746-stop345-whim2	2	2	TTYH3	7.62	2.09	1	1	310	AN1	frameshift-truncation	+	310	344	330		(R)	SLHLGLRASADR	(L)
0.202	-0.03	-0.095	0.287	-0.208	NA	NA	NA	NA	NA	NA	NA	NA	NA	NA	NA	NA	NA	NA	NA	-0.035	0.02	-0.266	-0.155	0.004	NA	NA	NA	NA	NA	NP_001167590-A-1-3_58_46_58	NP_001167590-A-1-3-chr10-99498406-99508025-187-stop59-whim12	2	2	ZFYVE27	7.52	7.52	1	1	58	A	frameshift-truncation	+	58	58	46		(K)	RLEIYLEPLKDAA	(-)
1.336	1.079	1.177	0.748	1.603	NA	NA	NA	NA	NA	0.664	0.709	0.602	0.509	0.337	NA	NA	NA	NA	NA	NA	NA	NA	NA	NA	NA	NA	NA	NA	NA	NP_079194-A-6-9_119_109_127	NP_079194-A-6-9-chr20-35390951-35399275-147-whim2	2	2	DSN1	7.39	2.43		0	119	ISED	inframe-splice-exon-deletion	-			109		(K)	SLHPIHQGITASSLSEELK	(H)
NA	NA	NA	NA	NA	-0.095	0.59	-0.05	0.639	0.521	NA	NA	NA	NA	NA	NA	NA	NA	NA	NA	0.99	3.308	2.881	2.972	1.299	NA	NA	NA	NA	NA	NP_001231611-AN1-3-chr11_47_63_74	NP_001231611-AN1-3-chr11-120139953-120156104-stop92-whim2	2	2	POU2F3	7.24	3.38	1	2	47	AN1	frameshift-truncation	+	47	91	63		(K)	SHHPEIIPFLCK	(Y)
NA	NA	NA	NA	NA	NA	NA	NA	NA	NA	NA	NA	NA	NA	NA	0.122	-0.1175	0.214	0.137	0.315	NA	NA	NA	NA	NA	-0.471	-0.582	-0.752	-0.327	-0.336	NP_789786-AN2-7-chr5_207_207_220	NP_789786-AN2-7-chr5-68599771-68602643-stop517-whim12	2	2	CCDC125	7.08	5.7	2	2	207	AN2	insertion	-	207	210	207		(R)	PLFSRLNCENAVLK	(E)
NA	NA	NA	NA	NA	-0.193	0.171	-0.017	0.271	0.169	NA	NA	NA	NA	NA	NA	NA	NA	NA	NA	NA	NA	NA	NA	NA	NA	NA	NA	NA	NA	NP_001243728-AN1-1-chr12_2_77_97	NP_001243728-AN1-1-chr12-6645759-6645850-stop294-whim12	1	1	GAPDH	11.03	11.03	6	205	2	AN1	frameshift-substitution	+	2	292	77	M88m	(R)	VIISAPSADAPmFVMGVNHEK	(Y)
NA	NA	NA	NA	NA	NA	NA	NA	NA	NA	NA	NA	NA	NA	NA	NA	NA	NA	NA	NA	NA	NA	NA	NA	NA	0.248	0.782	0.798	0.362	0.612	NP_031387-A-10-12_844_840_852	NP_031387-A-10-12-chr14-52486896-52495439-144-variant-whim12	1	2	NID2	19.46	19.46		0	844	ISED	inframe-splice-exon-deletion	-			840		(R)	HTCIYVDECSENR	(C)
NA	NA	NA	NA	NA	-0.024	-0.268	-0.263	-0.42	-0.213	NA	NA	NA	NA	NA	NA	NA	NA	NA	NA	NA	NA	NA	NA	NA	NA	NA	NA	NA	NA	NP_036205-A-2-4_56_50_71	NP_036205-A-2-4-chr5-10254317-10256066-165-whim12	1	1	CCT5	25.67	25.54		0	56	ISED	inframe-splice-exon-deletion	+			50		(R)	TSLGPNVLAGALLEEAEQLLDR	(G)
NA	NA	NA	NA	NA	NA	NA	NA	NA	NA	0.615	0.699	0.796	0.328	0.348	NA	NA	NA	NA	NA	NA	NA	NA	NA	NA	NA	NA	NA	NA	NA	NP_001018079-A-4-6_203_202_228	NP_001018079-A-4-6-chr1-67889960-67890765-90-variant-whim4	1	1	SERBP1	25.5	25.5		0	203	ISED	inframe-splice-exon-deletion	-			202		(R)	SDLDQSNVTEETPEGEEHHPVADTENK	(E)
0.56	0.459	0.801	0.085	0.637	NA	NA	NA	NA	NA	NA	NA	NA	NA	NA	NA	NA	NA	NA	NA	NA	NA	NA	NA	NA	NA	NA	NA	NA	NA	NP_001267-A-2-4_238_225_243	NP_001267-A-2-4-chr1-203149005-203150289-183-whim12	1	2	CHI3L1	17.19	17.19		0	238	ISED	inframe-splice-exon-deletion	-			225		(R)	GQEDASPDRFSNTICDFLR	(G)
0.354	0.417	0.014	0.253	0.453	NA	NA	NA	NA	NA	NA	NA	NA	NA	NA	NA	NA	NA	NA	NA	NA	NA	NA	NA	NA	NA	NA	NA	NA	NA	NP_004361-A-53-55_813_788_814	NP_004361-A-53-55-chr6-75875495-75887378-273-variant-whim12	1	1	COL12A1	25	25		0	813	ISED	inframe-splice-exon-deletion	-			788		(K)	YEVSVIPEYFSGPGTPLTGNAATEEER	(G)
NA	NA	NA	NA	NA	NA	NA	NA	NA	NA	NA	NA	NA	NA	NA	0.429	0.4265	0.99	0.471	0.556	NA	NA	NA	NA	NA	NA	NA	NA	NA	NA	NP_277055-AN1-2-chr19_47_68_82	NP_277055-AN1-2-chr19-38795130-38795204-stop86-whim2	1	3	C19orf33	13.96	13.96	5	281	47	AN1	frameshift-truncation	+	47	85	68		(K)	DTTALPTPAAAPAIR	(T)
NA	NA	NA	NA	NA	NA	NA	NA	NA	NA	NA	NA	NA	NA	NA	0.657	0.6435	0.539	0.524	0.625	NA	NA	NA	NA	NA	NA	NA	NA	NA	NA	NP_113663-A-8-11_639_640_651	NP_113663-A-8-11-chr1-6509151-6517243-410-stop697-whim6	1	2	ESPN	13.44	13.78	1	1	639	A	frameshift-truncation	+	639	696	640		(R)	GGGGGPAGQHAR	(L)
NA	NA	NA	NA	NA	NA	NA	NA	NA	NA	NA	NA	NA	NA	NA	1.141	1.0395	1.032	1.18	0.537	NA	NA	NA	NA	NA	NA	NA	NA	NA	NA	NP_055100-AN1-4-chr9_120_104_120	NP_055100-AN1-4-chr9-133573638-133574689-stop121-whim30	1	2	EXOSC2	20.9	20.9	2	1	120	AN1	frameshift-truncation	+	120	120	104		(R)	LDSVLLLSSMNLPGGEL	(-)
NA	NA	NA	NA	NA	1.09	1.276	0.689	1.397	0.899	NA	NA	NA	NA	NA	NA	NA	NA	NA	NA	NA	NA	NA	NA	NA	NA	NA	NA	NA	NA	NP_001243000-AN1-2-chr17_88_81_115	NP_001243000-AN1-2-chr17-78247203-78252562-stop192-whim12	1	1	RNF213	20.76	17.6	5	126	88	AN1	frameshift-truncation	+	88	190	81		(K)	ASWTVQEGATSEVLVDAAVDLISDEWEAANAIPSK	(R)
0.371	0.413	0.356	0.13	0.319	NA	NA	NA	NA	NA	NA	NA	NA	NA	NA	NA	NA	NA	NA	NA	NA	NA	NA	NA	NA	NA	NA	NA	NA	NA	NP_620124-AN1-9-chr16_214_195_215	NP_620124-AN1-9-chr16-720773-720888-stop315-whim2	1	1	RHOT2	20.47	20.47	4	31	214	AN1	frameshift-truncation	+	214	314	195		(R)	LSDQDLDQALSDEELNAFQQK	(S)
0.203	-0.107	-0.165	-0.281	0.313	NA	NA	NA	NA	NA	NA	NA	NA	NA	NA	NA	NA	NA	NA	NA	NA	NA	NA	NA	NA	NA	NA	NA	NA	NA	NP_001108086-AN2-3-chr15_230_257_264	NP_001108086-AN2-3-chr15-89444917-89448987-stop304-whim2	1	2	MFGE8	10.96	5.53	3	5	230	AN2	frameshift-truncation	-	230	303	257		(R)	ATSTPGLR	(G)
NA	NA	NA	NA	NA	NA	NA	NA	NA	NA	NA	NA	NA	NA	NA	0.432	0.4135	0.363	0.159	0.356	NA	NA	NA	NA	NA	NA	NA	NA	NA	NA	NP_001136113-AN1-11-chr12_529_529_537	NP_001136113-AN1-11-chr12-133149208-133150675-stop592-whim12	1	2	FBRSL1	11.3	6.86	6	341	529	AN1	frameshift-truncation	+	529	591	529		(K)	TSSPIEVAR	(R)
NA	NA	NA	NA	NA	NA	NA	NA	NA	NA	NA	NA	NA	NA	NA	NA	NA	NA	NA	NA	0.706	0.827	0.563	0.863	0.336	NA	NA	NA	NA	NA	NP_001121135-AN1-1-chr9_34_40_59	NP_001121135-AN1-1-chr9-124044828-124064201-stop117-whim12	1	1	GSN	18.91	18.91	2	1	34	AN1	frameshift-truncation	+	34	116	40		(R)	LCPVSSQPNSMVVEHPEFLK	(A)
0.654	0.679	0.654	0.369	0.639	NA	NA	NA	NA	NA	NA	NA	NA	NA	NA	NA	NA	NA	NA	NA	NA	NA	NA	NA	NA	NA	NA	NA	NA	NA	NP_002853-AN1-4-chr20_177_198_211	NP_002853-AN1-4-chr20-25252122-25255212-stop279-whim30	1	2	PYGB	18.87	18.87	2	3	177	AN1	frameshift-truncation	+	177	278	198		(K)	ARPEYMLPVHFYGR	(V)
NA	NA	NA	NA	NA	0.241	0.846	0.64	1.446	1.212	NA	NA	NA	NA	NA	NA	NA	NA	NA	NA	NA	NA	NA	NA	NA	NA	NA	NA	NA	NA	NP_079035-A-3-5_295_342_362	NP_079035-A-3-5-chr8-99207050-99215335-64-stop372-whim2	1	1	NIPAL2	18.81	18.28	2	5	295	A	frameshift-extension	-	295	371	342		(K)	IQPDSHSLSYGTLPDGSDSTK	(S)
NA	NA	NA	NA	NA	0.209	0.386	-0.119	0.509	0.179	NA	NA	NA	NA	NA	NA	NA	NA	NA	NA	NA	NA	NA	NA	NA	NA	NA	NA	NA	NA	NP_006639-AN1-20-chr9_1646_1633_1650	NP_006639-AN1-20-chr9-96052329-96054592-stop1706-whim2	1	1	WNK2	18.73	18.73	5	132	1646	AN1	frameshift-truncation	+	1646	1705	1633		(R)	GAVMEQGTSSSMTESSPR	(S)
NA	NA	NA	NA	NA	NA	NA	NA	NA	NA	NA	NA	NA	NA	NA	1.167	1.6065	1.536	1.599	1.081	NA	NA	NA	NA	NA	NA	NA	NA	NA	NA	NP_000843-A-2-5_14_13_36	NP_000843-A-2-5-chr11-67351640-67352608-195-whim12	1	1	GSTP1	18.67	18.04		0	14	ISED	inframe-splice-exon-deletion	+			13		(R)	GLYGKDQQEAALVDMVNDGVEDLR	(C)
NA	NA	NA	NA	NA	NA	NA	NA	NA	NA	-0.902	0.488	0.107	0.059	0.246	NA	NA	NA	NA	NA	NA	NA	NA	NA	NA	NA	NA	NA	NA	NA	NP_065741-AN1-2-chr5_154_146_159	NP_065741-AN1-2-chr5-139815842-139818087-stop205-whim12	1	1	ANKHD1-EIF4EBP3	18.24	18.24	5	77	154	AN1	frameshift-truncation	+	154	204	146		(R)	LEALLEAADPEVLR	(R)
NA	NA	NA	NA	NA	NA	NA	NA	NA	NA	NA	NA	NA	NA	NA	0.914	0.8715	0.767	0.845	1.036	NA	NA	NA	NA	NA	NA	NA	NA	NA	NA	NP_036439-A-5-7_784_770_784	NP_036439-A-5-7-chr18-5397425-5406775-123-whim30	1	1	EPB41L3	18.15	15.87		0	784	ISED	inframe-splice-exon-deletion	-			770		(R)	QEDAPMIEPLVPEEK	(M)
NA	NA	NA	NA	NA	NA	NA	NA	NA	NA	NA	NA	NA	NA	NA	0.166	-0.2395	0.02	-0.227	-0.096	NA	NA	NA	NA	NA	NA	NA	NA	NA	NA	NP_067047-AN1-3-chr9_2005_2005_2022	NP_067047-AN1-3-chr9-109692970-109694543-stop2113-whim12	1	1	ZNF462	18.01	18.01	5	44	2005	AN1	frameshift-truncation	+	2005	2112	2005		(K)	QEADDPAHLFLDGLEAAK	(D)
NA	NA	NA	NA	NA	-0.704	-0.812	-0.767	-1.081	-0.836	NA	NA	NA	NA	NA	NA	NA	NA	NA	NA	NA	NA	NA	NA	NA	NA	NA	NA	NA	NA	NP_116090-AN1-6-chr19_236_226_236	NP_116090-AN1-6-chr19-55857717-55857872-stop237-whim2	1	1	SUV420H2	17.98	17.98	1	1	236	AN1	frameshift-truncation	+	236	236	226		(K)	NEHCECHTCER	(-)
NA	NA	NA	NA	NA	-0.245	0.029	-0.262	0.186	0.005	NA	NA	NA	NA	NA	NA	NA	NA	NA	NA	NA	NA	NA	NA	NA	NA	NA	NA	NA	NA	NP_056189-A-14-16_97_84_108	NP_056189-A-14-16-chr22-39146325-39147214-138-variant-whim2	1	1	SUN2	17.93	17.93		0	97	ISED	inframe-splice-exon-deletion	-			84		(R)	SSLEELHGDANWGYSDVDQQSSSSR	(L)
0.157	-0.138	0.095	0.078	0.163	NA	NA	NA	NA	NA	NA	NA	NA	NA	NA	NA	NA	NA	NA	NA	NA	NA	NA	NA	NA	NA	NA	NA	NA	NA	NP_002473-A-12-14_694_672_694	NP_002473-A-12-14-chr1-46082065-46083134-78-whim2	1	1	NASP	17.86	14.66		0	694	ISED	inframe-splice-exon-deletion	+			672		(K)	ATLVESSTSGFTPGGGGSSVSMR	(K)
NA	NA	NA	NA	NA	NA	NA	NA	NA	NA	NA	NA	NA	NA	NA	-0.479	-0.5755	-0.275	-0.884	-0.461	NA	NA	NA	NA	NA	NA	NA	NA	NA	NA	NP_000312-A-13-15_445_433_448	NP_000312-A-13-15-chr13-48951170-48954188-57-whim6	1	1	RB1	17.05	17.05		0	445	ISED	inframe-splice-exon-deletion	+			433		(K)	AVGQGCVEIGSQEEER	(L)
NA	NA	NA	NA	NA	0.759	0.447	0.523	0.729	0.454	NA	NA	NA	NA	NA	NA	NA	NA	NA	NA	NA	NA	NA	NA	NA	NA	NA	NA	NA	NA	NP_115786-AN1-2-chr8_49_55_66	NP_115786-AN1-2-chr8-42761401-42780681-stop93-whim2	1	1	HOOK3	16.92	12.3	1	2	49	AN1	frameshift-truncation	+	49	92	55		(R)	DPAYFDENWLNR	(I)
NA	NA	NA	NA	NA	NA	NA	NA	NA	NA	NA	NA	NA	NA	NA	NA	NA	NA	NA	NA	-0.217	-0.154	0.104	-0.037	-0.363	NA	NA	NA	NA	NA	NP_060191-AN1-23-chr19_819_806_823	NP_060191-AN1-23-chr19-14038843-14038939-stop846-whim12	1	1	CC2D1A	16.88	15.56	6	28	819	AN1	frameshift-truncation	+	819	845	806		(R)	WLVIDPVPAAVPTVAGPK	(G)
NA	NA	NA	NA	NA	NA	NA	NA	NA	NA	NA	NA	NA	NA	NA	NA	NA	NA	NA	NA	1.135	0.922	1.271	1.276	0.919	NA	NA	NA	NA	NA	NP_789771-AN1-11-chr4_567_563_591	NP_789771-AN1-11-chr4-2910331-2911065-stop641-whim12	1	1	ADD1	16.82	16.82	4	31	567	AN1	frameshift-truncation	+	567	640	563		(R)	SLVQDAPLSDCTETIEGLELTEQTFSPAK	(S)
NA	NA	NA	NA	NA	0.497	0.672	0.635	0.463	0.534	NA	NA	NA	NA	NA	NA	NA	NA	NA	NA	NA	NA	NA	NA	NA	NA	NA	NA	NA	NA	NP_078939-AN1-8-chr20_334_358_369	NP_078939-AN1-8-chr20-57287635-57288406-stop415-whim30	1	1	NPEPL1	16.79	12.97	2	7	334	AN1	frameshift-truncation	+	334	414	358		(R)	TVEINNTDAEGR	(L)
NA	NA	NA	NA	NA	NA	NA	NA	NA	NA	NA	NA	NA	NA	NA	-0.075	0.0075	-0.218	-0.174	0.057	NA	NA	NA	NA	NA	NA	NA	NA	NA	NA	NP_062536-A-16-18_1139_1133_1148	NP_062536-A-16-18-chr10-24822166-24831621-120-variant-whim6	1	1	KIAA1217	16.78	16.78		0	1139	ISED	inframe-splice-exon-deletion	+			1133		(K)	IMAELQNLEFFHEDVR	(K)
0.578	0.824	0.521	0.557	0.475	NA	NA	NA	NA	NA	NA	NA	NA	NA	NA	NA	NA	NA	NA	NA	NA	NA	NA	NA	NA	NA	NA	NA	NA	NA	NP_001164267-A-4-7_32_19_32	NP_001164267-A-4-7-chr8-82627130-82630416-168-stop33-whim2	1	1	ZFAND1	16.38	16.38		0	32	ISED	inframe-splice-exon-deletion	-			19		(R)	DFLPFVCDDCSGIF	(-)
NA	NA	NA	NA	NA	-0.077	0.138	0.034	0.496	0.318	NA	NA	NA	NA	NA	NA	NA	NA	NA	NA	NA	NA	NA	NA	NA	NA	NA	NA	NA	NA	NP_002333-A-6-8_224_212_227	NP_002333-A-6-8-chr12-6495610-6497965-108-variant-whim2	1	1	LTBR	16.3	16.25		0	224	ISED	inframe-splice-exon-deletion	+			212		(K)	NPLEPLPPEMSGSLLK	(R)
NA	NA	NA	NA	NA	NA	NA	NA	NA	NA	NA	NA	NA	NA	NA	NA	NA	NA	NA	NA	0.237	0.256	0.127	0.285	0.189	NA	NA	NA	NA	NA	NP_001026859-A-4-6_474_457_476	NP_001026859-A-4-6-chr9-26913945-26919307-69-whim12	1	1	PLAA	16.01	16.01		0	474	ISED	inframe-splice-exon-deletion	-			457		(K)	GQMLGLGNPSFSDPFTGAGR	(Y)
NA	NA	NA	NA	NA	NA	NA	NA	NA	NA	NA	NA	NA	NA	NA	NA	NA	NA	NA	NA	NA	NA	NA	NA	NA	-0.634	-0.794	-1.075	-0.814	-0.855	NP_005508-AN1-4-chr1_48_64_75	NP_005508-AN1-4-chr1-26800626-26801065-stop83-whim2	1	1	HMGN2	15.92	15.92	3	18	48	AN1	frameshift-truncation	+	48	82	64		(K)	EGNNPAENGDAK	(T)
NA	NA	NA	NA	NA	1.08	1.072	1.16	1.147	0.966	NA	NA	NA	NA	NA	NA	NA	NA	NA	NA	NA	NA	NA	NA	NA	NA	NA	NA	NA	NA	NP_065897-AN1-6-chr4_454_470_478	NP_065897-AN1-6-chr4-48385801-48396592-stop495-whim12	1	1	SLAIN2	15.91	12.25	6	203	454	AN1	frameshift-truncation	+	454	494	470		(K)	QLLQTSSTK	(R)
NA	NA	NA	NA	NA	NA	NA	NA	NA	NA	NA	NA	NA	NA	NA	0.759	0.7045	0.51	0.59	0.373	NA	NA	NA	NA	NA	NA	NA	NA	NA	NA	NP_001159477-AN1-10-chr1_548_542_553	NP_001159477-AN1-10-chr1-29365938-29379618-stop630-whim12	1	1	EPB41	15.81	13	5	32	548	AN1	frameshift-truncation	+	548	629	542		(R)	SLDGAAVDSADR	(S)
-0.097	-0.04	-0.033	-0.011	0.026	NA	NA	NA	NA	NA	NA	NA	NA	NA	NA	NA	NA	NA	NA	NA	NA	NA	NA	NA	NA	NA	NA	NA	NA	NA	NP_001166184-AN1-13-chr3_539_565_573	NP_001166184-AN1-13-chr3-37360685-37369910-stop578-whim2	1	1	GOLGA4	15.78	11.61	1	1	539	AN1	frameshift-truncation	+	539	577	565		(K)	EQELEMTIK	(E)
NA	NA	NA	NA	NA	NA	NA	NA	NA	NA	NA	NA	NA	NA	NA	-0.073	0.2445	-0.196	0.168	-0.17	NA	NA	NA	NA	NA	NA	NA	NA	NA	NA	NP_001060-AN2-2-chr6_93_78_93	NP_001060-AN2-2-chr6-3155290-3155858-stop94-whim12	1	1	TUBB2A	15.71	15.71	5	73	93	AN2	frameshift-truncation	-	93	93	78		(R)	SGPFGQIFRPDNFVFG	(-)
NA	NA	NA	NA	NA	NA	NA	NA	NA	NA	NA	NA	NA	NA	NA	1.068	1.0955	1.202	1.013	1.045	NA	NA	NA	NA	NA	NA	NA	NA	NA	NA	NP_056018-A-3-5_146_143_151	NP_056018-A-3-5-chr1-150413499-150415706-78-whim12	1	2	RPRD2	15.44	11.16		0	146	ISED	inframe-splice-exon-deletion	+			143		(R)	EALTSTNPK	(A)
NA	NA	NA	NA	NA	NA	NA	NA	NA	NA	NA	NA	NA	NA	NA	NA	NA	NA	NA	NA	NA	NA	NA	NA	NA	0.226	0.649	0.71	0.869	1.422	NP_001241667-AN2-3-chr2_117_116_127	NP_001241667-AN2-3-chr2-151328269-151331388-stop243-whim2	1	1	RND3	15.08	15.08	1	1	117	AN2	deletion-short3	-	117	117	116		(K)	KGEIQEFCPNTK	(M)
0.224	0.031	0.11	0.16	0.004	NA	NA	NA	NA	NA	NA	NA	NA	NA	NA	NA	NA	NA	NA	NA	NA	NA	NA	NA	NA	NA	NA	NA	NA	NA	NP_000419-A-16-19_971_966_977	NP_000419-A-16-19-chr14-74976562-74983524-243-whim6	1	1	LTBP2	14.97	14.97		0	971	ISED	inframe-splice-exon-deletion	-			966		(K)	GHCQDVDECASR	(A)
1.184	1.69	1.354	0.738	1.005	NA	NA	NA	NA	NA	NA	NA	NA	NA	NA	NA	NA	NA	NA	NA	NA	NA	NA	NA	NA	NA	NA	NA	NA	NA	NP_000010-A-3-5_81_79_92	NP_000010-A-3-5-chr11-108004664-108005868-96-whim12	1	1	ACAT1	14.91	14.91		0	81	ISED	inframe-splice-exon-deletion	+			79		(K)	AGLPISTPCTTINK	(V)
0.501	0.784	0.955	0.623	0.528	NA	NA	NA	NA	NA	NA	NA	NA	NA	NA	NA	NA	NA	NA	NA	NA	NA	NA	NA	NA	NA	NA	NA	NA	NA	NP_004990-A-28-30_1047_1044_1054	NP_004990-A-28-30-chr6-76604977-76617321-39-whim12	1	1	MYO6	14.74	9.71		0	1047	ISED	inframe-splice-exon-deletion	+			1044		(K)	MTPGPAVLATK	(A)
NA	NA	NA	NA	NA	NA	NA	NA	NA	NA	0.442	0.548	0.655	0.489	0.652	NA	NA	NA	NA	NA	NA	NA	NA	NA	NA	NA	NA	NA	NA	NA	NP_057165-A-10-13_701_690_705	NP_057165-A-10-13-chr4-169812208-169824907-321-whim12	1	1	PALLD	14.71	14.23		0	701	ISED	inframe-splice-exon-deletion	+			690		(R)	FKEDLLNNGQPIYWFK	(D)
NA	NA	NA	NA	NA	NA	NA	NA	NA	NA	NA	NA	NA	NA	NA	NA	NA	NA	NA	NA	0.837	0.924	0.912	1.137	0.769	NA	NA	NA	NA	NA	NP_068506-A-30-32_303_289_304	NP_068506-A-30-32-chr10-29821101-29824917-930-variant-whim12	1	1	SVIL	14.53	11.26		0	303	ISED	inframe-splice-exon-deletion	-			289		(K)	DSEGDTPSLINWPSSK	(S)
NA	NA	NA	NA	NA	NA	NA	NA	NA	NA	NA	NA	NA	NA	NA	0.328	0.3695	0.085	0.245	0.228	NA	NA	NA	NA	NA	NA	NA	NA	NA	NA	NP_001077362-A-10-12_330_322_333	NP_001077362-A-10-12-chr14-31388312-31404368-111-whim12	1	1	STRN3	14.48	11.23		0	330	ISED	inframe-splice-exon-deletion	-			322		(R)	SSGDGTEWGANR	(T)
NA	NA	NA	NA	NA	NA	NA	NA	NA	NA	NA	NA	NA	NA	NA	-0.106	-0.2155	-0.209	-0.182	-0.096	NA	NA	NA	NA	NA	NA	NA	NA	NA	NA	NP_031401-AN1-1-chr1_80_94_105	NP_031401-AN1-1-chr1-11074022-11075580-stop139-whim2	1	1	TARDBP	14.45	11.04	5	15	80	AN1	frameshift-truncation	+	80	138	94		(R)	EAEAGESLEPGR	(Q)
NA	NA	NA	NA	NA	NA	NA	NA	NA	NA	NA	0.644	0.092	NA	NA	NA	NA	NA	NA	NA	NA	NA	NA	NA	NA	NA	NA	NA	NA	NA	NP_001406-AN1-9-chrX_338_352_378	NP_001406-AN1-9-chrX-24086225-24089677-stop399-whim2	1	1	EIF2S3	14.23	13.22	1	6	338	AN1	frameshift-truncation	+	338	398	352	M352m	(R)	mVGQVLGAVGALPEIFTELEISYFLLR	(R)
NA	NA	NA	NA	NA	0.916	-0.709	0.223	-0.399	-0.848	NA	NA	NA	NA	NA	NA	NA	NA	NA	NA	NA	NA	NA	NA	NA	NA	NA	NA	NA	NA	NP_001098065-AN1-1-chr22_16_85_97	NP_001098065-AN1-1-chr22-45718307-45719052-stop120-whim12	1	1	FAM118A	14.22	14.22	4	4	16	AN1	frameshift-truncation	+	16	119	85		(K)	DRDLLVVAHDLIR	(K)
NA	NA	NA	NA	NA	NA	NA	NA	NA	NA	NA	NA	NA	NA	NA	NA	NA	NA	NA	NA	0.292	1.579	1.136	1.092	0.577	NA	NA	NA	NA	NA	NP_115568-A-2-5_48_41_51	NP_115568-A-2-5-chr17-37785483-37790135-99-whim2	1	1	PPP1R1B	14.17	11.12		0	48	ISED	inframe-splice-exon-deletion	+			41		(R)	LSEHSSPAVQR	(I)
NA	NA	NA	NA	NA	NA	NA	NA	NA	NA	NA	NA	NA	NA	NA	NA	NA	NA	NA	NA	0.554	0.737	0.596	0.75	0.569	NA	NA	NA	NA	NA	NP_003474-AN1-4-chr12_95_103_115	NP_003474-AN1-4-chr12-66345195-66346135-stop119-whim12	1	2	HMGA2	13.83	13.83	1	29	95	AN1	frameshift-extension	+	95	118	103		(K)	DHPGNLIYLLFSK	(N)
NA	NA	NA	NA	NA	NA	NA	NA	NA	NA	NA	NA	NA	NA	NA	-0.114	0.0615	0.078	-0.262	-0.04	NA	NA	NA	NA	NA	NA	NA	NA	NA	NA	NP_003925-AN1-2-chr9_64_58_74	NP_003925-AN1-2-chr9-133470975-133485343-stop85-whim12	1	1	FUBP3	13.66	13.66	4	16	64	AN1	frameshift-truncation	+	64	84	58		(K)	RPLDDGGNQLGALVHQR	(D)
NA	NA	NA	NA	NA	NA	NA	NA	NA	NA	NA	NA	NA	NA	NA	-0.043	-0.1665	0.358	-0.133	0.379	NA	NA	NA	NA	NA	NA	NA	NA	NA	NA	NP_060191-AN1-12-chr19_453_453_463	NP_060191-AN1-12-chr19-14030764-14031372-stop577-whim12	1	2	CC2D1A	13.66	13.66	5	21	453	AN1	frameshift-truncation	+	453	576	453		(K)	NSPVAPTAQPK	(A)
NA	NA	NA	NA	NA	NA	NA	NA	NA	NA	NA	NA	NA	NA	NA	-0.314	-0.2125	-0.25	-0.315	-0.326	NA	NA	NA	NA	NA	NA	NA	NA	NA	NA	NP_005477-AN1-3-chr17_75_87_94	NP_005477-AN1-3-chr17-52982928-52991120-stop154-whim2	1	1	TOM1L1	13.63	7.25	1	1	75	AN1	frameshift-truncation	+	75	153	87		(K)	EVYLDLVK	(K)
-0.097	0.038	-0.031	-0.123	-0.033	NA	NA	NA	NA	NA	NA	NA	NA	NA	NA	NA	NA	NA	NA	NA	NA	NA	NA	NA	NA	NA	NA	NA	NA	NA	NP_000889-A-3-5_380_371_392	NP_000889-A-3-5-chrX-43628665-43637928-98-stop428-whim2	1	1	MAOB	13.62	12.6	3	13	380	A	frameshift-truncation	-	380	427	371		(K)	VLGSLEALEGSTPASGQDLLCR	(H)
NA	NA	NA	NA	NA	NA	NA	NA	NA	NA	NA	NA	NA	NA	NA	0.702	0.7885	-0.013	0.71	-0.504	NA	NA	NA	NA	NA	NA	NA	NA	NA	NA	NP_066552-AN1-6-chr18_194_199_208	NP_066552-AN1-6-chr18-9124981-9126831-stop225-whim2	1	1	NDUFV2	13.57	9.18	2	6	194	AN1	frameshift-truncation	+	194	223	199		(K)	DIEEIIDELK	(A)
NA	NA	NA	NA	NA	NA	NA	NA	NA	NA	NA	NA	NA	NA	NA	NA	NA	NA	NA	NA	-0.907	-0.908	-0.992	-0.641	-0.783	NA	NA	NA	NA	NA	NP_006418-AN1-2-chr14_105_120_127	NP_006418-AN1-2-chr14-105222161-105222955-stop155-whim2	1	1	SIVA1	13.53	8.39	1	1	105	AN1	frameshift-truncation	+	105	154	120		(K)	AVCGQCER	(A)
NA	NA	NA	NA	NA	0.538	0.002	0.281	-0.259	-0.602	NA	NA	NA	NA	NA	NA	NA	NA	NA	NA	NA	NA	NA	NA	NA	NA	NA	NA	NA	NA	NP_853536-AN1-4-chr13_132_137_144	NP_853536-AN1-4-chr13-34400023-34403990-stop195-whim2	1	1	RFC3	13.52	4.39	1	1	132	AN1	frameshift-truncation	+	132	194	137		(K)	DAQHALRR	(T)
NA	NA	NA	NA	NA	NA	NA	NA	NA	NA	NA	NA	NA	NA	NA	-0.384	-0.3695	-0.252	-0.526	-0.218	NA	NA	NA	NA	NA	NA	NA	NA	NA	NA	NP_004913-AN1-5-chr10_330_320_339	NP_004913-AN1-5-chr10-75520607-75521855-stop367-whim12	1	1	SEC24C	13.47	11.51	5	40	330	AN1	frameshift-truncation	+	330	366	320		(K)	RLDPDAIPSPQLSELPPQQK	(T)
NA	NA	NA	NA	NA	NA	NA	NA	NA	NA	NA	NA	NA	NA	NA	0.863	0.8205	0.537	0.788	0.518	NA	NA	NA	NA	NA	NA	NA	NA	NA	NA	NP_116204-A-3-5_194_188_197	NP_116204-A-3-5-chr16-28966003-28967471-81-whim12	1	1	NFATC2IP	13.38	13.38		0	194	ISED	inframe-splice-exon-deletion	+			188		(K)	KKTEFLEVNK	(R)
NA	NA	NA	NA	NA	NA	NA	NA	NA	NA	0.416	0.038	0.086	0.387	0.387	NA	NA	NA	NA	NA	NA	NA	NA	NA	NA	NA	NA	NA	NA	NA	NP_036205-AN1-4-chr5_178_211_218	NP_036205-AN1-4-chr5-10256265-10258198-stop264-whim2	1	1	CCT5	13.34	9.48	2	2	178	AN1	frameshift-truncation	+	178	263	211		(R)	DVDFELIK	(V)
NA	NA	NA	NA	NA	NA	NA	NA	NA	NA	NA	NA	NA	NA	NA	0.143	0.2205	0.044	0.113	0.031	NA	NA	NA	NA	NA	NA	NA	NA	NA	NA	NP_054742-AN1-8-chr10_243_280_295	NP_054742-AN1-8-chr10-1142186-1149538-stop345-whim12	1	1	WDR37	13.32	13.32	6	46	243	AN1	frameshift-truncation	+	243	344	280		(K)	SHQGVVIASDWLVGGK	(Q)
NA	NA	NA	NA	NA	0.641	0.464	0.332	0.351	0.296	NA	NA	NA	NA	NA	NA	NA	NA	NA	NA	NA	NA	NA	NA	NA	NA	NA	NA	NA	NA	NP_940978-AN1-21-chr1_1212_1202_1213	NP_940978-AN1-21-chr1-983067-983161-stop1332-whim2	1	1	AGRN	13.3	13.3	2	16	1212	AN1	frameshift-truncation	+	1212	1331	1202		(R)	AIVDVHFDPTFR	(A)
0.335	0.719	0.827	0.137	0.343	NA	NA	NA	NA	NA	NA	NA	NA	NA	NA	NA	NA	NA	NA	NA	NA	NA	NA	NA	NA	NA	NA	NA	NA	NA	NP_002151-A-11-19_1072_1069_1077	NP_002151-A-11-19-chr9-117804620-117835881-1911-variant-whim6	1	2	TNC	13.27	13.27		0	1072	ISED	inframe-splice-exon-deletion	-			1069		(K)	ASTAMGSPK	(E)
NA	NA	NA	NA	NA	-0.697	0.462	-0.166	0.625	0.908	NA	NA	NA	NA	NA	NA	NA	NA	NA	NA	NA	NA	NA	NA	NA	NA	NA	NA	NA	NA	NP_005750-A-4-6_188_184_200	NP_005750-A-4-6-chr2-204255866-204260378-147-whim12	1	1	ABI2	13.14	13.14		0	188	ISED	inframe-splice-exon-deletion	+			184		(K)	GTLGSSGSSGGSHPSSR	(S)
-0.618	-0.217	-0.086	0.029	-0.479	NA	NA	NA	NA	NA	NA	NA	NA	NA	NA	NA	NA	NA	NA	NA	NA	NA	NA	NA	NA	NA	NA	NA	NA	NA	NP_001092902-AN1-23-chr17_880_888_895	NP_001092902-AN1-23-chr17-59445855-59465978-stop911-whim2	1	1	BCAS3	13.1	6.86	2	1	880	AN1	frameshift-truncation	+	880	910	888		(K)	QCQQPSVR	(E)
NA	NA	NA	NA	NA	NA	NA	NA	NA	NA	NA	NA	NA	NA	NA	NA	NA	NA	NA	NA	NA	NA	NA	NA	NA	-0.059	-0.066	-0.145	-0.121	-0.106	NP_115982-A-2-4_75_63_84	NP_115982-A-2-4-chr9-35813335-35813640-105-whim6	1	1	HINT2	13.05	13.05		0	75	ISED	inframe-splice-exon-deletion	-			63		(K)	SLPADILYEDQQLLGHLLLVAK	(Q)
0.774	0.154	0.061	0.432	0.879	NA	NA	NA	NA	NA	NA	NA	NA	NA	NA	NA	NA	NA	NA	NA	NA	NA	NA	NA	NA	NA	NA	NA	NA	NA	NP_004095-A-5-7_2136_2126_2143	NP_004095-A-5-7-chr17-80038798-80039476-189-whim30	1	1	FASN	13.03	12.63		0	2136	ISED	inframe-splice-exon-deletion	-			2126		(R)	DLVEAVAHILELACPTPK	(E)
NA	NA	NA	NA	NA	NA	NA	NA	NA	NA	NA	NA	NA	NA	NA	NA	NA	NA	NA	NA	NA	NA	NA	NA	NA	-0.072	0.434	-0.013	0.338	0.464	NP_000293-AN1-7-chr1_249_248_257	NP_000293-AN1-7-chr1-12017071-12017904-stop281-whim12	1	1	PLOD1	12.98	12.02	4	7	249	AN1	frameshift-truncation	+	249	280	248		(K)	LNYLGNYIPR	(F)
0.138	0.122	0.177	0.385	0.205	NA	NA	NA	NA	NA	NA	NA	NA	NA	NA	NA	NA	NA	NA	NA	NA	NA	NA	NA	NA	NA	NA	NA	NA	NA	NP_848927-A-9-11_461_452_463	NP_848927-A-9-11-chr8-98725997-98735106-141-whim12	1	1	MTDH	12.97	9.84		0	461	ISED	inframe-splice-exon-deletion	+			452		(K)	QGEDNSTAQPIK	(T)
NA	NA	NA	NA	NA	1.044	0.929	0.961	1.225	1.07	NA	NA	NA	NA	NA	NA	NA	NA	NA	NA	NA	NA	NA	NA	NA	NA	NA	NA	NA	NA	NP_000207-AN2-7-chrX_403_412_419	NP_000207-AN2-7-chrX-8534250-8536272-stop420-whim30	1	1	KAL1	12.94	12.94	1	3	403	AN2	frameshift-truncation	-	403	419	412		(R)	NDQHGVGE	(-)
NA	NA	NA	NA	NA	NA	NA	NA	NA	NA	0.309	0.726	0.677	0.718	0.555	NA	NA	NA	NA	NA	NA	NA	NA	NA	NA	NA	NA	NA	NA	NA	NP_001009993-A-3-5_24_19_32	NP_001009993-A-3-5-chr2-131813268-131840149-84-whim2	1	1	FAM168B	12.94	12.94		0	24	ISED	inframe-splice-exon-deletion	-			19		(K)	GIGYPGYTPGTPYK	(V)
NA	NA	NA	NA	NA	0.003	0.012	0.372	0.289	0.242	NA	NA	NA	NA	NA	NA	NA	NA	NA	NA	NA	NA	NA	NA	NA	NA	NA	NA	NA	NA	NP_919223-AN1-6-chr2_248_247_256	NP_919223-AN1-6-chr2-178081499-178081590-stop283-whim2	1	1	HNRNPA3	12.86	10.87	3	11	248	AN1	frameshift-truncation	+	248	282	247		(R)	GYGGGGGGSR	(G)
NA	NA	NA	NA	NA	NA	NA	NA	NA	NA	NA	NA	NA	NA	NA	NA	NA	NA	NA	NA	0.261	0.142	-0.173	0.073	0.126	NA	NA	NA	NA	NA	NP_115565-AN1-28-chr13_1110_1108_1117	NP_115565-AN1-28-chr13-113530255-113536126-stop1193-whim12	1	1	ATP11A	12.85	10.7	4	18	1110	AN1	insertion-short3	+	1110	1110	1108		(R)	VQQNGCAQPR	(D)
NA	NA	NA	NA	NA	NA	NA	NA	NA	NA	NA	NA	NA	NA	NA	NA	NA	NA	NA	NA	NA	NA	NA	NA	NA	-0.449	-0.367	-0.38	-0.183	-0.299	NP_037450-AN1-19-chr9_1662_1648_1664	NP_037450-AN1-19-chr9-134357195-134357760-stop1768-whim12	1	1	PRRC2B	12.72	12.72	6	530	1662	AN1	frameshift-truncation	+	1662	1767	1648		(K)	AVTAFSSTETGSAEGFK	(S)
NA	NA	NA	NA	NA	NA	NA	NA	NA	NA	0.515	0.48	0.712	0.554	0.66	NA	NA	NA	NA	NA	NA	NA	NA	NA	NA	NA	NA	NA	NA	NA	NP_000215-AN1-5-chr12_317_315_324	NP_000215-AN1-5-chr12-53345640-53345905-stop393-whim2	1	1	KRT18	12.69	11.59	1	1	317	AN1	frameshift-truncation	+	317	392	315		(R)	NLASLENSLR	(E)
0.389	0.257	0.293	0.122	0.269	NA	NA	NA	NA	NA	NA	NA	NA	NA	NA	NA	NA	NA	NA	NA	NA	NA	NA	NA	NA	NA	NA	NA	NA	NA	NP_000024-AN1-4-chrX_466_521_535	NP_000024-AN1-4-chrX-153001967-153002065-stop615-whim2	1	1	ABCD1	12.64	12.64	2	3	466	AN1	frameshift-truncation	+	466	614	521		(R)	TDSPFEGLSLDYSFK	(T)
NA	NA	NA	NA	NA	0.042	0.136	-0.559	0.393	0.333	NA	NA	NA	NA	NA	NA	NA	NA	NA	NA	NA	NA	NA	NA	NA	NA	NA	NA	NA	NA	NP_061881-AN1-2-chr22_108_125_138	NP_061881-AN1-2-chr22-39908031-39908322-stop149-whim12	1	1	SMCR7L	12.55	12.55	5	30	108	AN1	frameshift-truncation	+	108	148	125		(R)	AGSGQASCCGHMCR	(A)
NA	NA	NA	NA	NA	-0.069	-0.597	-0.245	-0.143	-0.336	NA	NA	NA	NA	NA	NA	NA	NA	NA	NA	NA	NA	NA	NA	NA	NA	NA	NA	NA	NA	NP_060656-AN1-20-chr1_749_772_787	NP_060656-AN1-20-chr1-169819486-169820945-stop823-whim6	1	1	C1orf112	12.45	12.45	1	1	749	AN1	frameshift-truncation	+	749	822	772		(K)	GIFWEPFANVTVEEAK	(R)
NA	NA	NA	NA	NA	NA	NA	NA	NA	NA	NA	NA	NA	NA	NA	NA	NA	NA	NA	NA	0.218	0.294	0.503	0.63	0.004	NA	NA	NA	NA	NA	NP_056393-A-4-6_180_175_184	NP_056393-A-4-6-chr19-34699956-34706500-177-whim12	1	1	LSM14A	12.42	12.42		0	180	ISED	inframe-splice-exon-deletion	+			175		(K)	TQLSQAEVHK	(V)
NA	NA	NA	NA	NA	NA	NA	NA	NA	NA	NA	NA	NA	NA	NA	NA	NA	NA	NA	NA	-0.024	-0.131	-0.186	-0.222	-0.075	NA	NA	NA	NA	NA	NP_001007467-AN1-12-chr6_673_1436_1444	NP_001007467-AN1-12-chr6-158919844-158922715-stop1553-whim30	1	1	TULP4	12.37	6.54	1	8	673	AN1	frameshift-extension	+	673	1552	1436		(R)	AAGELEEAK	(C)
NA	NA	NA	NA	NA	NA	NA	NA	NA	NA	NA	NA	NA	NA	NA	NA	NA	NA	NA	NA	NA	NA	NA	NA	NA	-0.34	-0.405	-0.357	-0.398	-0.297	NP_064530-A-4-6_209_199_214	NP_064530-A-4-6-chr9-131772488-131774514-24-whim12	1	1	SH3GLB2	12.36	12.36		0	209	ISED	inframe-splice-exon-deletion	-			199		(R)	NYILSASASAAEQELR	(V)
NA	NA	NA	NA	NA	NA	NA	NA	NA	NA	NA	NA	NA	NA	NA	0.511	0.5315	0.454	0.544	0.308	NA	NA	NA	NA	NA	NA	NA	NA	NA	NA	NP_079033-AN1-4-chr9_276_272_279	NP_079033-AN1-4-chr9-140622981-140637846-stop342-whim2	1	1	EHMT1	12.29	4.94	4	23	276	AN1	frameshift-truncation	+	276	341	272		(K)	SQTAAVSR	(K)
NA	NA	NA	NA	NA	NA	NA	NA	NA	NA	NA	NA	NA	NA	NA	NA	NA	NA	NA	NA	0.007	0.241	0.271	0.211	0.216	NA	NA	NA	NA	NA	NP_005076-AN1-13-chr9_649_641_651	NP_005076-AN1-13-chr9-134021691-134022873-stop736-whim12	1	1	NUP214	12.19	9.58	6	76	649	AN1	frameshift-truncation	+	649	735	641		(K)	SSVLPSPSAGR	(S)
NA	NA	NA	NA	NA	NA	NA	NA	NA	NA	NA	NA	NA	NA	NA	-0.134	-0.1865	-0.201	-0.561	0.132	NA	NA	NA	NA	NA	NA	NA	NA	NA	NA	NP_853536-AN1-8-chr13_293_278_293	NP_853536-AN1-8-chr13-34409354-34516389-stop294-whim2	1	1	RFC3	12.12	12.12	2	6	293	AN1	frameshift-truncation	+	293	293	278	M292m	(R)	LYELLTHCIPPEIImK	(-)
NA	NA	NA	NA	NA	NA	NA	NA	NA	NA	0.427	0.068	0.085	0.267	0.542	NA	NA	NA	NA	NA	NA	NA	NA	NA	NA	NA	NA	NA	NA	NA	NP_004334-A-2-4_66_65_74	NP_004334-A-2-4-chr19-13050049-13050866-204-whim12	1	1	CALR	12.1	12.1		0	66	ISED	inframe-splice-exon-deletion	+			65		(K)	GPDICGPGTK	(K)
NA	NA	NA	NA	NA	2.499	2.701	2.976	2.071	2.255	NA	NA	NA	NA	NA	NA	NA	NA	NA	NA	NA	NA	NA	NA	NA	NA	NA	NA	NA	NA	NP_037450-AN1-9-chr9_404_511_522	NP_037450-AN1-9-chr9-134330553-134334556-stop535-whim12	1	1	PRRC2B	12.03	4.95	5	49	404	AN1	frameshift-truncation	+	404	534	511		(R)	RGAPSPGGEAGR	(L)
NA	NA	NA	NA	NA	NA	NA	NA	NA	NA	NA	NA	NA	NA	NA	NA	NA	NA	NA	NA	NA	NA	NA	NA	NA	0.213	-0.045	0.434	-0.241	-0.19	NP_055447-A-20-22_950_945_953	NP_055447-A-20-22-chr11-12270793-12278331-108-whim12	1	1	MICAL2	11.98	11.98		0	950	ISED	inframe-splice-exon-deletion	+			945		(R)	TVHPQESMR	(K)
0.161	-0.046	0.086	-0.123	0.005	NA	NA	NA	NA	NA	NA	NA	NA	NA	NA	NA	NA	NA	NA	NA	NA	NA	NA	NA	NA	NA	NA	NA	NA	NA	NP_003594-A-10-12_303_293_312	NP_003594-A-10-12-chr4-186551752-186559232-57-whim2	1	1	SORBS2	11.84	8.57		0	303	ISED	inframe-splice-exon-deletion	-			293		(K)	FFSELEFGRPASLYQSSIDR	(S)
NA	NA	NA	NA	NA	NA	NA	NA	NA	NA	-0.579	-0.646	-0.301	-0.554	-0.343	NA	NA	NA	NA	NA	NA	NA	NA	NA	NA	NA	NA	NA	NA	NA	NP_003119-AN1-31-chr2_2140_2124_2140	NP_003119-AN1-31-chr2-54887136-54889467-stop2141-whim30	1	1	SPTBN1	11.8	9.25	1	2	2140	AN1	frameshift-truncation	+	2140	2140	2124		(K)	GEQVSQNGLPAEQGSPR	(-)
NA	NA	NA	NA	NA	NA	NA	NA	NA	NA	0.734	1.032	0.561	0.947	1	NA	NA	NA	NA	NA	NA	NA	NA	NA	NA	NA	NA	NA	NA	NA	NP_001132931-A-1-3_127_130_137	NP_001132931-A-1-3-chr1-246755243-246795195-206-stop138-whim12	1	1	CNST	11.74	8.86	4	12	127	A	frameshift-truncation	+	127	137	130		(R)	ILFPGGGL	(-)
NA	NA	NA	NA	NA	0.236	-0.111	0.183	0.477	0.068	NA	NA	NA	NA	NA	NA	NA	NA	NA	NA	NA	NA	NA	NA	NA	NA	NA	NA	NA	NA	NP_056364-AN1-9-chr14_395_402_409	NP_056364-AN1-9-chr14-65199619-65203002-stop442-whim2	1	1	PLEKHG3	11.62	6.14	4	65	395	AN1	frameshift-truncation	+	395	441	402		(R)	ATLPSGQR	(G)
NA	NA	NA	NA	NA	NA	NA	NA	NA	NA	0.491	0.839	0.609	0.986	0.6	NA	NA	NA	NA	NA	NA	NA	NA	NA	NA	NA	NA	NA	NA	NA	NP_079031-A-16-19_107_106_114	NP_079031-A-16-19-chr15-59193486-59209133-246-whim12	1	1	SLTM	11.61	8.89		0	107	ISED	inframe-splice-exon-deletion	-			106		(K)	DGEEEENEK	(D)
NA	NA	NA	NA	NA	0.162	0.005	0.078	-0.145	-0.008	NA	NA	NA	NA	NA	NA	NA	NA	NA	NA	NA	NA	NA	NA	NA	NA	NA	NA	NA	NA	NP_004332-AN1-35-chr2_1866_1858_1876	NP_004332-AN1-35-chr2-27463229-27463434-stop1898-whim12	1	1	CAD	11.6	6.87	5	56	1866	AN1	frameshift-truncation	+	1866	1897	1858		(R)	ASDPGLPAVFLRPGAGIPR	(G)
NA	NA	NA	NA	NA	NA	NA	NA	NA	NA	NA	NA	NA	NA	NA	-0.243	-0.1945	-0.138	-0.115	-0.131	NA	NA	NA	NA	NA	NA	NA	NA	NA	NA	NP_680781-AN1-18-chr16_812_937_948	NP_680781-AN1-18-chr16-28846014-28846402-stop1045-whim2	1	1	ATXN2L	11.57	9	1	1	812	AN1	frameshift-substitution	+	812	1044	937		(R)	CVCHPPPAAAPR	(L)
NA	NA	NA	NA	NA	NA	NA	NA	NA	NA	-0.534	-0.475	-0.467	-0.327	-0.303	NA	NA	NA	NA	NA	NA	NA	NA	NA	NA	NA	NA	NA	NA	NA	NP_005724-AN1-12-chr5_562_581_588	NP_005724-AN1-12-chr5-137520365-137520498-stop608-whim2	1	1	KIF20A	11.48	4.23	1	1	562	AN1	frameshift-truncation	+	562	607	581		(K)	LQLEMHLR	(D)
NA	NA	NA	NA	NA	NA	NA	NA	NA	NA	NA	NA	NA	NA	NA	NA	NA	NA	NA	NA	0.011	0.076	0.056	-0.066	-0.037	NA	NA	NA	NA	NA	NP_004166-AN1-1-chr22_43_76_84	NP_004166-AN1-1-chr22-24953768-24963933-stop136-whim2	1	2	SNRPD3	11.47	8.11	1	1	43	AN1	frameshift-extension	+	43	135	76	M82m	(R)	FLILPDmLK	(N)
NA	NA	NA	NA	NA	0.163	0.129	0.19	0.101	0.079	NA	NA	NA	NA	NA	NA	NA	NA	NA	NA	NA	NA	NA	NA	NA	NA	NA	NA	NA	NA	NP_001248335-A-20-22_1211_1208_1221	NP_001248335-A-20-22-chr9-13140148-13150509-111-variant-whim6	1	1	MPDZ	11.45	11.45		0	1211	ISED	inframe-splice-exon-deletion	-			1208		(R)	IVEAPSQSESEPEK	(A)
0.326	0.267	0.367	0.275	0.424	NA	NA	NA	NA	NA	NA	NA	NA	NA	NA	NA	NA	NA	NA	NA	NA	NA	NA	NA	NA	NA	NA	NA	NA	NA	NP_004930-AN1-16-chr2_403_408_418	NP_004930-AN1-16-chr2-15758394-15760373-stop453-whim4	1	2	DDX1	11.42	4.22	1	1	403	AN1	frameshift-truncation	+	403	452	408		(K)	IMHFPTWVDLK	(G)
NA	NA	NA	NA	NA	NA	NA	NA	NA	NA	NA	NA	NA	NA	NA	-0.114	0.1105	0.069	-0.032	0.161	NA	NA	NA	NA	NA	NA	NA	NA	NA	NA	NP_001129176-AN1-6-chr17_204_259_270	NP_001129176-AN1-6-chr17-43215197-43215258-stop326-whim2	1	1	ACBD4	11.39	11.39	2	5	204	AN1	frameshift-truncation	+	204	325	259		(R)	ALQESMQEVQAR	(V)
0.017	-0.119	-0.168	-0.125	-0.016	NA	NA	NA	NA	NA	NA	NA	NA	NA	NA	NA	NA	NA	NA	NA	NA	NA	NA	NA	NA	NA	NA	NA	NA	NA	NP_002511-AN1-9-chr5_258_258_266	NP_002511-AN1-9-chr5-170832407-170834132-stop276-whim12	1	1	NPM1	11.32	11.32	5	60	258	AN1	frameshift-truncation	+	258	275	258		(K)	FLACIHNLK	(E)
NA	NA	NA	NA	NA	NA	NA	NA	NA	NA	NA	NA	NA	NA	NA	NA	NA	NA	NA	NA	0.226	-0.265	-0.168	-0.249	0.135	NA	NA	NA	NA	NA	NP_001092755-AN1-4-chr2_98_90_98	NP_001092755-AN1-4-chr2-232577226-232577552-stop99-whim12	1	1	PTMA	11.31	11.31	3	226	98	AN1	frameshift-truncation	+	98	98	90		(K)	RAAEDDEDD	(-)
NA	NA	NA	NA	NA	0.286	0.543	0.578	0.632	0.381	NA	NA	NA	NA	NA	NA	NA	NA	NA	NA	NA	NA	NA	NA	NA	NA	NA	NA	NA	NA	NP_005920-AN2-3-chr3_647_668_679	NP_005920-AN2-3-chr3-196731042-196733419-stop763-whim30	1	1	MFI2	11.29	11.29	1	8	647	AN2	insertion	-	647	669	668		(R)	CFQDLFGDDHNK	(N)
NA	NA	NA	NA	NA	NA	NA	NA	NA	NA	NA	NA	NA	NA	NA	NA	NA	NA	NA	NA	NA	NA	NA	NA	NA	-0.834	-0.749	-0.771	-0.769	-0.792	NP_001124479-AN1-24-chr4_930_989_1004	NP_001124479-AN1-24-chr4-154524604-154524956-stop1141-whim12	1	1	KIAA0922	11.28	11.28	3	2	930	AN1	frameshift-truncation	+	930	1140	989		(K)	TSTAAASSTSTTTEEK	(Q)
NA	NA	NA	NA	NA	NA	NA	NA	NA	NA	NA	NA	NA	NA	NA	NA	NA	NA	NA	NA	NA	NA	NA	NA	NA	-0.348	-0.348	-0.233	-0.287	-0.098	NP_002618-AN1-3-chr10_89_90_110	NP_002618-AN1-3-chr10-3141544-3143640-stop128-whim12	1	1	PFKP	11.28	11.28	1	5	89	AN1	frameshift-truncation	+	89	127	90		(R)	GITNLCVIGGDGSLTGANLFR	(K)
NA	NA	NA	NA	NA	0.229	0.337	0.33	0.487	0.422	NA	NA	NA	NA	NA	NA	NA	NA	NA	NA	NA	NA	NA	NA	NA	NA	NA	NA	NA	NA	NP_620614-AN1-3-chr9_264_274_288	NP_620614-AN1-3-chr9-2039900-2041330-stop289-whim12	1	1	SMARCA2	11.28	11.28	4	35	264	AN1	frameshift-truncation	+	264	288	274		(K)	TPADSVSGEGLLPDS	(-)
-0.249	-0.314	-0.014	-0.011	0.127	NA	NA	NA	NA	NA	NA	NA	NA	NA	NA	NA	NA	NA	NA	NA	NA	NA	NA	NA	NA	NA	NA	NA	NA	NA	NP_001547-AN1-16-chr8_580_602_612	NP_001547-AN1-16-chr8-42179463-42179544-stop623-whim12	1	1	IKBKB	11.16	11.16	3	4	580	AN1	frameshift-truncation	+	580	622	602		(R)	LLLQAIQSFEK	(K)
NA	NA	NA	NA	NA	NA	NA	NA	NA	NA	NA	NA	NA	NA	NA	NA	NA	NA	NA	NA	NA	NA	NA	NA	NA	0.608	1.08	0.613	0.717	0.588	NP_001034679-AN1-20-chrX_1051_1056_1063	NP_001034679-AN1-20-chrX-41031211-41043788-stop1103-whim6	1	1	USP9X	11.15	7.32	1	5	1051	AN1	frameshift-truncation	+	1051	1102	1056		(R)	GAYLNALK	(I)
NA	NA	NA	NA	NA	NA	NA	NA	NA	NA	NA	NA	NA	NA	NA	-0.139	-0.2505	0.053	-0.309	-0.054	NA	NA	NA	NA	NA	NA	NA	NA	NA	NA	NP_056273-AN1-3-chr8_140_156_164	NP_056273-AN1-3-chr8-11157657-11162382-stop224-whim6	1	1	MTMR9	11.14	7.47	1	1	140	AN1	frameshift-truncation	+	140	223	156		(K)	SIDDEALRK	(V)
NA	NA	NA	NA	NA	NA	NA	NA	NA	NA	NA	NA	NA	NA	NA	NA	NA	NA	NA	NA	NA	NA	NA	NA	NA	NA	NA	NA	NA	NA	NP_570850-AN1-8-chr3_282_270_283	NP_570850-AN1-8-chr3-193349454-193350253-stop310-whim30	1	1	OPA1	11.14	-0.09	1	2	282	AN1	frameshift-truncation	+	282	309	270		(K)	IDQLQEELLHTQSK	(T)
NA	NA	NA	NA	NA	NA	NA	NA	NA	NA	NA	NA	NA	NA	NA	NA	NA	NA	NA	NA	0.469	0.744	0.999	0.479	0.687	NA	NA	NA	NA	NA	NP_001005367-AN1-3-chr19_140_163_170	NP_001005367-AN1-3-chr19-54932562-54933372-stop270-whim2	1	1	TTYH1	11.12	4.51	2	26	140	AN1	frameshift-truncation	+	140	269	163		(R)	TELVAAAR	(G)
NA	NA	NA	NA	NA	NA	NA	NA	NA	NA	NA	NA	NA	NA	NA	NA	NA	NA	NA	NA	NA	NA	NA	NA	NA	NA	NA	NA	NA	NA	NP_003942-AN1-7-chrX_241_266_275	NP_003942-AN1-7-chrX-129498726-129499520-stop288-whim12	1	1	SLC25A14	11.09	11.09	1	1	241	AN1	frameshift-truncation	+	241	287	266		(R)	AIVGHVDLYK	(G)
NA	NA	NA	NA	NA	NA	NA	NA	NA	NA	0.304	0.393	0.394	0.329	0.336	NA	NA	NA	NA	NA	NA	NA	NA	NA	NA	NA	NA	NA	NA	NA	NP_001136060-AN1-9-chr1_316_324_334	NP_001136060-AN1-9-chr1-41235087-41236068-stop459-whim12	1	2	NFYC	11.07	7.13	6	207	316	AN1	insertion	+	316	418	324		(R)	VSELTGEAEPR	(E)
1.792	1.644	1.26	0.883	2.045	NA	NA	NA	NA	NA	NA	NA	NA	NA	NA	NA	NA	NA	NA	NA	NA	NA	NA	NA	NA	NA	NA	NA	NA	NA	NP_002810-AN1-7-chr19_240_239_246	NP_002810-AN1-7-chr19-804939-805072-stop369-whim2	1	1	PTBP1	11.06	9.41	1	1	240	AN1	frameshift-truncation	+	240	368	239		(K)	LLTSLNVK	(Y)
NA	NA	NA	NA	NA	NA	NA	NA	NA	NA	NA	NA	NA	NA	NA	NA	NA	NA	NA	NA	0.542	0.613	0.668	0.861	0.579	NA	NA	NA	NA	NA	NP_001139-AN1-45-chr4_3954_3984_3991	NP_001139-AN1-45-chr4-114294605-114295919-stop4016-whim12	1	1	ANK2	11.05	6.44	3	20	3954	AN1	frameshift-extension	+	3954	4015	3984		(K)	TTVVLGER	(M)
NA	NA	NA	NA	NA	NA	NA	NA	NA	NA	NA	NA	NA	NA	NA	NA	NA	NA	NA	NA	0.264	-0.047	-0.152	-0.047	0.061	NA	NA	NA	NA	NA	NP_665893-AN2-15-chr11_100_170_181	NP_665893-AN2-15-chr11-803648-804093-stop182-whim12	1	1	PIDD	11.02	11.02	6	84	100	AN2	frameshift-truncation	-	100	181	170		(R)	SGCALAVSQLPL	(-)
NA	NA	NA	NA	NA	NA	NA	NA	NA	NA	0.108	0.121	-0.135	0.129	-0.147	NA	NA	NA	NA	NA	NA	NA	NA	NA	NA	NA	NA	NA	NA	NA	NP_690856-AN1-10-chr9_536_521_536	NP_690856-AN1-10-chr9-6493932-6496959-stop542-whim2	1	1	UHRF2	10.92	8.15	3	23	536	AN1	frameshift-truncation	+	536	541	521		(R)	IGAPSADQTLTNMNRR	(T)
NA	NA	NA	NA	NA	NA	NA	NA	NA	NA	NA	NA	NA	NA	NA	NA	NA	NA	NA	NA	0.048	-0.013	-0.088	0.115	0.081	NA	NA	NA	NA	NA	NP_036479-AN1-3-chr6_114_126_136	NP_036479-AN1-3-chr6-52941341-52943578-stop152-whim30	1	1	FBXO9	10.87	11.5	1	1	114	AN1	frameshift-truncation	+	114	151	126		(R)	AMQLVPDIEFK	(I)
NA	NA	NA	NA	NA	NA	NA	NA	NA	NA	NA	NA	NA	NA	NA	NA	NA	NA	NA	NA	NA	NA	NA	NA	NA	-0.067	-0.206	-0.247	-0.234	-0.087	NP_066926-AN1-1-chr2_35_54_68	NP_066926-AN1-1-chr2-85133241-85133489-stop69-whim12	1	1	TMSB10	10.85	10.85	5	181	35	AN1	frameshift-extension	+	35	67	54		(K)	ILEDFLPPSSSRPQS	(-)
NA	NA	NA	NA	NA	NA	NA	NA	NA	NA	NA	NA	NA	NA	NA	NA	NA	NA	NA	NA	NA	NA	NA	NA	NA	0.347	0.563	0.52	0.544	0.653	NP_114098-A-3-5_499_490_503	NP_114098-A-3-5-chrX-19560311-19568091-129-whim12	1	1	SH3KBP1	10.79	10.79		0	499	ISED	inframe-splice-exon-deletion	-			490		(R)	RPPSQSLTSVSDNK	(A)
NA	NA	NA	NA	NA	NA	NA	NA	NA	NA	NA	NA	NA	NA	NA	0.19	0.3525	0.395	0.351	0.403	NA	NA	NA	NA	NA	NA	NA	NA	NA	NA	NP_001027454-A-4-6_222_217_229	NP_001027454-A-4-6-chr12-98931350-98938219-120-whim2	1	1	TMPO	10.64	10.64		0	222	ISED	inframe-splice-exon-deletion	+			217		(R)	VEHNQVETSEHFR	(I)
NA	NA	NA	NA	NA	NA	NA	NA	NA	NA	NA	NA	NA	NA	NA	NA	NA	NA	NA	NA	NA	NA	NA	NA	NA	NA	NA	NA	NA	NA	NP_061041-AN1-8-chr2_276_279_296	NP_061041-AN1-8-chr2-202342914-202343091-stop385-whim2	1	1	STRADB	10.56	10.56	1	1	276	AN1	frameshift-truncation	+	276	384	279		(K)	GPPYSPLDISIFPQSESR	(M)
NA	NA	NA	NA	NA	NA	NA	NA	NA	NA	NA	NA	NA	NA	NA	NA	NA	NA	NA	NA	-0.004	0.303	0.124	0.405	0.081	NA	NA	NA	NA	NA	NP_006253-AN1-3-chr12_238_258_268	NP_006253-AN1-3-chr12-49690310-49691232-stop296-whim6	1	1	PRPH	10.55	10.55	1	1	238	AN1	frameshift-truncation	+	238	295	258	M258m	(K)	mALDIEIATYR	(K)
NA	NA	NA	NA	NA	NA	NA	NA	NA	NA	NA	NA	NA	NA	NA	NA	NA	NA	NA	NA	0.499	0.668	0.404	0.181	0.397	NA	NA	NA	NA	NA	NP_001239264-AN1-7-chr15_802_794_807	NP_001239264-AN1-7-chr15-57754090-57770562-stop855-whim12	1	1	CGNL1	10.48	4.27	1	1	802	AN1	frameshift-truncation	+	802	854	794		(R)	ESVEEATKLLFLEK	(F)
NA	NA	NA	NA	NA	NA	NA	NA	NA	NA	NA	NA	NA	NA	NA	NA	NA	NA	NA	NA	NA	NA	NA	NA	NA	-0.186	0.145	-0.164	0.11	0.249	NP_001530-AN1-1-chr9_45_45_56	NP_001530-AN1-1-chr9-33026614-33026819-stop102-whim2	1	1	DNAJA1	10.46	10.46	2	1	45	AN1	frameshift-truncation	+	45	101	45		(K)	ISQAYEVLSDAK	(K)
NA	NA	NA	NA	NA	-1.393	-0.952	-1.176	-0.81	-1.217	NA	NA	NA	NA	NA	NA	NA	NA	NA	NA	NA	NA	NA	NA	NA	NA	NA	NA	NA	NA	NP_001612-AN1-9-chr7_388_507_524	NP_001612-AN1-9-chr7-17375410-17378810-stop742-whim30	1	1	AHR	10.44	10.44	1	2	388	AN1	frameshift-truncation	+	388	741	507		(R)	DIDLTDEILTYVQDSLSK	(S)
NA	NA	NA	NA	NA	NA	NA	NA	NA	NA	NA	NA	NA	NA	NA	NA	NA	NA	NA	NA	NA	NA	NA	NA	NA	-0.253	-0.164	-0.26	-0.112	-0.473	NP_055181-AN1-8-chr3_261_274_282	NP_055181-AN1-8-chr3-52725087-52726850-stop367-whim30	1	1	GNL3	10.37	9.38	1	1	261	AN1	frameshift-truncation	+	261	366	274		(R)	SMQVVPLDK	(Q)
NA	NA	NA	NA	NA	NA	NA	NA	NA	NA	NA	NA	NA	NA	NA	NA	NA	NA	NA	NA	NA	NA	NA	NA	NA	NA	NA	NA	NA	NA	NP_001154879-AN1-2-chr13_163_192_205	NP_001154879-AN1-2-chr13-80095110-80107463-stop216-whim12	1	1	NDFIP2	10.34	10.34	2	4	163	AN1	frameshift-truncation	+	163	215	192		(K)	AAAMAAAAAETSQR	(D)
NA	NA	NA	NA	NA	NA	NA	NA	NA	NA	0.381	0.124	0.343	0.09	0.353	NA	NA	NA	NA	NA	NA	NA	NA	NA	NA	NA	NA	NA	NA	NA	NP_001158275-AN2-3-chrX_153_173_180	NP_001158275-AN2-3-chrX-135957322-135957416-stop181-whim2	1	1	RBMX	10.32	10.32	2	5	153	AN2	frameshift-truncation	-	153	180	173		(R)	DSYESYGW	(-)
NA	NA	NA	NA	NA	NA	NA	NA	NA	NA	NA	NA	NA	NA	NA	0.395	0.3085	0.041	0.315	0.09	NA	NA	NA	NA	NA	NA	NA	NA	NA	NA	NP_060255-AN1-6-chr5_298_311_318	NP_060255-AN1-6-chr5-169021685-169023588-stop340-whim12	1	1	SPDL1	10.29	7.59	5	37	298	AN1	frameshift-truncation	+	298	339	311		(R)	LLAMLEQK	(N)
NA	NA	NA	NA	NA	0.572	0.194	0.201	0.533	0.351	NA	NA	NA	NA	NA	NA	NA	NA	NA	NA	NA	NA	NA	NA	NA	NA	NA	NA	NA	NA	NP_001127854-A-2-4_920_914_922	NP_001127854-A-2-4-chr3-12943022-12949848-50-stop923-whim12	1	1	IQSEC1	10.25	10.25	5	235	920	A	frameshift-truncation	-	920	922	914		(R)	DLSEAGVHH	(-)
0.938	0.627	0.978	0.544	0.693	NA	NA	NA	NA	NA	NA	NA	NA	NA	NA	NA	NA	NA	NA	NA	NA	NA	NA	NA	NA	NA	NA	NA	NA	NA	NP_071447-AN1-2-chr1_125_184_210	NP_071447-AN1-2-chr1-32044868-32045888-stop275-whim2	1	1	TINAGL1	10.21	4.19	5	15	125	AN1	frameshift-truncation	+	125	274	184		(R)	MLPESSRVLLPRCAEGEQPGVQRGKGR	(M)
NA	NA	NA	NA	NA	NA	NA	NA	NA	NA	NA	NA	NA	NA	NA	NA	NA	NA	NA	NA	0.554	1.013	1.212	1.019	0.683	NA	NA	NA	NA	NA	NP_543151-AN1-16-chr1_850_951_959	NP_543151-AN1-16-chr1-1564102-1564413-stop979-whim2	1	1	MIB2	10.14	6.19	3	2	850	AN1	frameshift-truncation	+	850	978	951		(R)	GPGPQANAR	(D)
NA	NA	NA	NA	NA	NA	NA	NA	NA	NA	-0.169	-0.071	-0.107	-0.04	-0.149	NA	NA	NA	NA	NA	NA	NA	NA	NA	NA	NA	NA	NA	NA	NA	NP_060972-AN1-3-chr5_105_93_105	NP_060972-AN1-3-chr5-140021365-140022075-stop106-whim12	1	1	TMCO6	10.12	10.12	3	4	105	AN1	frameshift-truncation	+	105	105	93		(R)	GLQHPETQQTFIR	(-)
NA	NA	NA	NA	NA	NA	NA	NA	NA	NA	NA	NA	NA	NA	NA	NA	NA	NA	NA	NA	NA	NA	NA	NA	NA	0.768	0.733	0.844	0.973	1.191	NP_599022-AN2-3-chr15_465_507_520	NP_599022-AN2-3-chr15-60792351-60793157-stop525-whim2	1	1	RORA	10.08	7.22	1	1	465	AN2	frameshift-truncation	-	465	524	507		(K)	EYHFFMLRSLMAAR	(K)
NA	NA	NA	NA	NA	NA	NA	NA	NA	NA	NA	NA	NA	NA	NA	NA	NA	NA	NA	NA	NA	NA	NA	NA	NA	-0.24	-0.249	-0.455	-0.209	-0.326	NP_004023-AN2-2-chr6_124_167_178	NP_004023-AN2-2-chr6-110726147-110729536-stop232-whim30	1	1	DDO	10.02	10.02	2	4	124	AN2	frameshift-truncation	-	124	231	167		(K)	CECPAYLPWLEK	(R)
NA	NA	NA	NA	NA	0.347	0.068	0.262	0.305	0.222	NA	NA	NA	NA	NA	NA	NA	NA	NA	NA	NA	NA	NA	NA	NA	NA	NA	NA	NA	NA	NP_002037-AN1-6-chr12_176_146_182	NP_002037-AN1-6-chr12-6646556-6647087-stop183-whim12	1	1	GAPDH	10.01	4.95	5	9	176	AN1	frameshift-truncation	+	176	182	146		(K)	IISNASCTTNCLAPLAKVIHDNFGIVEGLMRHPLLHL	(-)
NA	NA	NA	NA	NA	NA	NA	NA	NA	NA	0.139	-0.039	0.243	0.253	0.287	NA	NA	NA	NA	NA	NA	NA	NA	NA	NA	NA	NA	NA	NA	NA	NP_001034976-AN1-8-chr19_320_549_557	NP_001034976-AN1-8-chr19-36257856-36257951-stop677-whim30	1	1	C19orf55	9.98	9.98	1	2	320	AN1	frameshift-extension	+	320	676	549		(K)	VQATQPQTK	(V)
NA	NA	NA	NA	NA	NA	NA	NA	NA	NA	NA	NA	NA	NA	NA	NA	NA	NA	NA	NA	NA	NA	NA	NA	NA	NA	NA	NA	NA	NA	NP_001185722-AN1-4-chr3_111_116_129	NP_001185722-AN1-4-chr3-9843440-9845571-stop158-whim2	1	1	ARPC4-TTLL3	9.96	7.94	1	2	111	AN1	frameshift-truncation	+	111	157	116	M124m	(K)	LVDFVIHFmEEIDK	(E)
NA	NA	NA	NA	NA	NA	NA	NA	NA	NA	NA	NA	NA	NA	NA	NA	NA	NA	NA	NA	0.092	0.4	0.162	0.111	0.178	NA	NA	NA	NA	NA	NP_689799-A-2-4_1391_1388_1396	NP_689799-A-2-4-chr10-75260596-75265065-141-variant-whim21	1	1	USP54	9.85	9.85		0	1391	ISED	inframe-splice-exon-deletion	-			1388		(R)	TSQDSSNVR	(K)
NA	NA	NA	NA	NA	NA	NA	NA	NA	NA	NA	NA	NA	NA	NA	NA	NA	NA	NA	NA	0.042	0.342	0.529	0.25	0.015	NA	NA	NA	NA	NA	NP_079333-A-6-8_217_210_217	NP_079333-A-6-8-chr14-74512833-74516404-145-stop244-whim12	1	1	CCDC176	9.84	5.55	2	2	217	A	frameshift-truncation	+	217	243	210		(R)	AHHEAIVR	(S)
NA	NA	NA	NA	NA	NA	NA	NA	NA	NA	NA	NA	NA	NA	NA	-0.106	0.0125	0.063	-0.037	-0.07	NA	NA	NA	NA	NA	NA	NA	NA	NA	NA	NP_005023-AN1-1-chrX_26_24_31	NP_005023-AN1-1-chrX-114844635-114845114-stop32-whim12	1	1	PLS3	9.8	5.44	5	11	26	AN1	frameshift-truncation	+	26	31	24		(K)	VDRSTSPR	(-)
NA	NA	NA	NA	NA	NA	NA	NA	NA	NA	NA	NA	NA	NA	NA	0.312	0.3825	0.158	0.068	0.059	NA	NA	NA	NA	NA	NA	NA	NA	NA	NA	NP_848927-AN1-6-chr8_350_344_357	NP_848927-AN1-6-chr8-98703416-98708431-stop382-whim12	1	1	MTDH	9.8	9.8	5	43	350	AN1	frameshift-truncation	+	350	381	344		(R)	SIFSGIAAWSSVDR	(G)
0.346	0.539	0.317	0.63	0.552	NA	NA	NA	NA	NA	NA	NA	NA	NA	NA	NA	NA	NA	NA	NA	NA	NA	NA	NA	NA	NA	NA	NA	NA	NA	NP_002296-AN1-2-chr22_30_22_30	NP_002296-AN1-2-chr22-38073072-38074512-stop90-whim12	1	1	LGALS1	9.77	5.86	2	1	30	AN1	frameshift-truncation	+	30	89	22		(R)	GEVAPDAKR	(Q)
NA	NA	NA	NA	NA	NA	NA	NA	NA	NA	NA	NA	NA	NA	NA	-0.807	-0.7485	-0.093	-0.889	0.213	NA	NA	NA	NA	NA	NA	NA	NA	NA	NA	NP_001958-AN1-4-chr3_117_160_167	NP_001958-AN1-4-chr3-186502890-186503680-stop181-whim2	1	2	EIF4A2	9.71	2.78	2	1	117	AN1	frameshift-truncation	+	117	180	160		(R)	VFDMLNRR	(Y)
NA	NA	NA	NA	NA	NA	NA	NA	NA	NA	NA	NA	NA	NA	NA	NA	NA	NA	NA	NA	0.494	-0.718	-0.573	-1.051	0.295	NA	NA	NA	NA	NA	NP_001171669-A-7-9_227_222_230	NP_001171669-A-7-9-chr11-70265962-70269045-111-variant-whim4	1	1	CTTN	9.7	7.67		0	227	ISED	inframe-splice-exon-deletion	+			222		(K)	HESQKDYSK	(G)
NA	NA	NA	NA	NA	NA	NA	NA	NA	NA	NA	NA	NA	NA	NA	NA	NA	NA	NA	NA	0.057	-0.072	0.082	-0.062	-0.065	NA	NA	NA	NA	NA	NP_055877-AN1-7-chr10_1204_1220_1227	NP_055877-AN1-7-chr10-103904064-103906870-stop1300-whim6	1	1	PPRC1	9.7	2.76	1	3	1204	AN1	frameshift-truncation	+	1204	1299	1220		(R)	TPPEPSAK	(Q)
NA	NA	NA	NA	NA	NA	NA	NA	NA	NA	NA	NA	NA	NA	NA	NA	NA	NA	NA	NA	-0.114	0.266	-0.418	-0.517	-0.461	NA	NA	NA	NA	NA	NP_055111-AN1-12-chr3_470_471_479	NP_055111-AN1-12-chr3-15276652-15277772-stop504-whim2	1	1	CAPN7	9.64	9.64	2	2	470	AN1	frameshift-truncation	+	470	503	471		(K)	PLHAVRPFR	(Q)
NA	NA	NA	NA	NA	NA	NA	NA	NA	NA	0.043	-0.093	-0.178	-0.134	0.16	NA	NA	NA	NA	NA	NA	NA	NA	NA	NA	NA	NA	NA	NA	NA	NP_110379-A-2-4_366_356_366	NP_110379-A-2-4-chr6-160200822-160201474-193-stop388-whim2	1	1	TCP1	9.62	9.62	2	3	366	A	frameshift-truncation	-	366	387	356		(R)	ICDDELILIKK	(G)
-0.215	-0.814	-0.546	-0.578	-0.132	NA	NA	NA	NA	NA	NA	NA	NA	NA	NA	NA	NA	NA	NA	NA	NA	NA	NA	NA	NA	NA	NA	NA	NA	NA	NP_003925-A-15-18_478_514_528	NP_003925-A-15-18-chr9-133507409-133511385-149-stop567-whim2	1	1	FUBP3	9.62	9.62	3	4	478	A	frameshift-truncation	+	478	566	514		(R)	AGAGPQPGAVGQRPR	(G)
NA	NA	NA	NA	NA	NA	NA	NA	NA	NA	NA	NA	NA	NA	NA	NA	NA	NA	NA	NA	-0.474	0.108	-0.244	-0.026	-0.933	NA	NA	NA	NA	NA	NP_001243385-AN2-11-chr1_241_241_248	NP_001243385-AN2-11-chr1-1250000-1250203-stop286-whim2	1	1	CPSF3L	9.54	3.86	2	5	241	AN2	frameshift-truncation	-	241	285	241		(K)	GADEALAR	(L)
NA	NA	NA	NA	NA	NA	NA	NA	NA	NA	-0.066	-0.252	-0.082	0.04	-0.156	NA	NA	NA	NA	NA	NA	NA	NA	NA	NA	NA	NA	NA	NA	NA	NP_078801-A-17-19_194_191_200	NP_078801-A-17-19-chr1-231076302-231081134-93-variant-whim21	1	1	TTC13	9.52	4.79		0	194	ISED	inframe-splice-exon-deletion	-			191		(K)	GLHILSPLGR	(I)
-1.392	-0.795	-0.349	-0.566	-1.328	NA	NA	NA	NA	NA	NA	NA	NA	NA	NA	NA	NA	NA	NA	NA	NA	NA	NA	NA	NA	NA	NA	NA	NA	NA	NP_619580-AN1-5-chr19_229_247_254	NP_619580-AN1-5-chr19-50172372-50173502-stop335-whim30	1	1	BCL2L12	9.5	6.29	1	1	229	AN1	frameshift-substitution	+	229	334	247		(R)	DDSSRPSR	(A)
NA	NA	NA	NA	NA	NA	NA	NA	NA	NA	0.619	0.577	0.512	0.592	0.654	NA	NA	NA	NA	NA	NA	NA	NA	NA	NA	NA	NA	NA	NA	NA	NP_742066-AN1-2-chr2_63_77_89	NP_742066-AN1-2-chr2-43906064-43906655-stop90-whim2	1	1	PLEKHH2	9.42	9.42	2	3	63	AN1	frameshift-truncation	+	63	89	77		(R)	DLGLLQPPPPGFK	(-)
NA	NA	NA	NA	NA	NA	NA	NA	NA	NA	-0.274	-0.208	-0.357	-0.388	-0.16	NA	NA	NA	NA	NA	NA	NA	NA	NA	NA	NA	NA	NA	NA	NA	NP_005471-AN1-11-chr12_434_533_546	NP_005471-AN1-11-chr12-49723774-49724245-stop627-whim4	1	1	TROAP	9.37	9.37	2	4	434	AN1	frameshift-truncation	+	434	626	533		(R)	VELGASEPCTLEHR	(S)
NA	NA	NA	NA	NA	NA	NA	NA	NA	NA	0.965	1.12	1.099	0.647	1.223	NA	NA	NA	NA	NA	NA	NA	NA	NA	NA	NA	NA	NA	NA	NA	NP_078852-AN1-2-chr6_108_104_111	NP_078852-AN1-2-chr6-72003082-72003232-stop139-whim12	1	1	OGFRL1	9.36	9.36	6	557	108	AN1	frameshift-truncation	+	108	138	104		(R)	HQYPQNFK	(D)
0.296	0.403	0.322	0.281	0.272	NA	NA	NA	NA	NA	NA	NA	NA	NA	NA	NA	NA	NA	NA	NA	NA	NA	NA	NA	NA	NA	NA	NA	NA	NA	NP_001092902-AN1-23-chr17_880_873_888	NP_001092902-AN1-23-chr17-59445855-59457866-stop904-whim12	1	1	BCAS3	9.35	9.35	6	42	880	AN1	frameshift-truncation	+	880	903	873		(R)	DVVGSGTDTALDVAVK	(T)
NA	NA	NA	NA	NA	NA	NA	NA	NA	NA	1.318	1.689	1.536	1.345	1.311	NA	NA	NA	NA	NA	NA	NA	NA	NA	NA	NA	NA	NA	NA	NA	NP_066553-AN1-3-chr21_422_430_437	NP_066553-AN1-3-chr21-44324386-44326949-stop453-whim21	1	1	NDUFV3	9.35	6.12	1	12	422	AN1	frameshift-truncation	+	422	452	430		(R)	YSPCGDWK	(D)
NA	NA	NA	NA	NA	NA	NA	NA	NA	NA	NA	NA	NA	NA	NA	0.318	0.2455	-0.017	0.167	0.01	NA	NA	NA	NA	NA	NA	NA	NA	NA	NA	NP_056305-A-16-21_214_207_217	NP_056305-A-16-21-chr10-102262241-102267664-540-variant-whim4	1	1	SEC31B	9.2	9.2		0	214	ISED	inframe-splice-exon-deletion	-			207		(K)	VSDHSNRFGGK	(L)
NA	NA	NA	NA	NA	NA	NA	NA	NA	NA	NA	NA	NA	NA	NA	NA	NA	NA	NA	NA	NA	NA	NA	NA	NA	0.94	1.01	0.831	1.09	0.683	NP_001074008-A-5-10_216_213_223	NP_001074008-A-5-10-chr2-197523584-197538964-384-variant-whim2	1	1	CCDC150	9.16	0.99		0	216	ISED	inframe-splice-exon-deletion	+			213		(K)	IQEVLNDQLTK	(K)
-0.161	0.084	0.154	-0.356	-0.172	NA	NA	NA	NA	NA	NA	NA	NA	NA	NA	NA	NA	NA	NA	NA	NA	NA	NA	NA	NA	NA	NA	NA	NA	NA	NP_000469-AN1-2-chr1_61_69_80	NP_000469-AN1-2-chr1-21887238-21887607-stop103-whim2	1	2	ALPL	9.14	9.14	1	1	61	AN1	frameshift-truncation	+	61	102	69		(K)	GQLHHNPGEETR	(L)
NA	NA	NA	NA	NA	NA	NA	NA	NA	NA	NA	NA	NA	NA	NA	NA	NA	NA	NA	NA	0.506	0.699	0.636	0.181	0.402	NA	NA	NA	NA	NA	NP_001242997-AN1-4-chr9_169_217_226	NP_001242997-AN1-4-chr9-140323468-140323655-stop289-whim2	1	1	NOXA1	9.11	9.11	1	2	169	AN1	frameshift-truncation	+	169	288	217		(K)	HLEPVDFLGK	(A)
NA	NA	NA	NA	NA	NA	NA	NA	NA	NA	NA	NA	NA	NA	NA	NA	NA	NA	NA	NA	-0.637	-0.418	-0.433	-0.329	-0.681	NA	NA	NA	NA	NA	NP_115612-AN2-9-chr1_796_795_804	NP_115612-AN2-9-chr1-22030881-22032219-stop805-whim12	1	1	USP48	9.1	4.37	6	76	796	AN2	frameshift-truncation	-	796	804	795		(K)	LLSYGPVSGK	(-)
NA	NA	NA	NA	NA	NA	NA	NA	NA	NA	NA	NA	NA	NA	NA	NA	NA	NA	NA	NA	-0.209	0.003	-0.163	0.243	-0.374	NA	NA	NA	NA	NA	NP_001107656-AN2-5-chr6_114_106_116	NP_001107656-AN2-5-chr6-153319286-153319684-stop117-whim12	1	1	MTRF1L	9.02	1.71	3	2	114	AN2	frameshift-truncation	-	114	116	106		(K)	EITQLKHQDWR	(-)
NA	NA	NA	NA	NA	NA	NA	NA	NA	NA	NA	NA	NA	NA	NA	NA	NA	NA	NA	NA	NA	NA	NA	NA	NA	2.139	2.583	1.623	1.558	2.655	NP_071762-A-9-11_379_364_382	NP_071762-A-9-11-chr1-156132885-156144612-181-stop388-whim30	1	1	SEMA4A	9.02	1.75	1	1	379	A	frameshift-truncation	+	379	387	364		(R)	WTTYRGPETNPRPGSPQGR	(S)
NA	NA	NA	NA	NA	NA	NA	NA	NA	NA	-0.196	0.133	-0.43	-1.588	0.193	NA	NA	NA	NA	NA	NA	NA	NA	NA	NA	NA	NA	NA	NA	NA	NP_056991-A-8-10_330_322_330	NP_056991-A-8-10-chr4-17597157-17600078-89-stop331-whim2	1	1	LAP3	9.01	9.01	2	6	330	A	frameshift-truncation	+	330	330	322		(K)	LNLPINIIG	(-)
NA	NA	NA	NA	NA	NA	NA	NA	NA	NA	NA	NA	NA	NA	NA	NA	NA	NA	NA	NA	NA	NA	NA	NA	NA	0.096	0.126	0.015	0.132	-0.015	NP_001484-AN1-7-chrX_274_288_299	NP_001484-AN1-7-chrX-153669542-153669942-stop372-whim30	1	1	GDI1	9	3.73	1	1	274	AN1	frameshift-truncation	+	274	371	288		(K)	QLICDPSYIPDR	(V)
NA	NA	NA	NA	NA	NA	NA	NA	NA	NA	NA	NA	NA	NA	NA	-1.28	-0.6895	0.859	-1.281	0.733	NA	NA	NA	NA	NA	NA	NA	NA	NA	NA	NP_055515-AN1-6-chr16_435_455_463	NP_055515-AN1-6-chr16-546859-555540-stop503-whim12	1	1	RAB11FIP3	8.99	4.42	1	1	435	AN1	frameshift-truncation	+	435	502	455	Q455q	(R)	qENLQLVHR	(S)
0.57	0.414	0.381	0.114	0.566	NA	NA	NA	NA	NA	NA	NA	NA	NA	NA	NA	NA	NA	NA	NA	NA	NA	NA	NA	NA	NA	NA	NA	NA	NA	NP_057094-AN1-7-chr8_236_266_274	NP_057094-AN1-7-chr8-79610748-79624224-stop275-whim12	1	1	ZC2HC1A	8.97	1.94	3	11	236	AN1	frameshift-truncation	+	236	274	266		(K)	RHELLPIYK	(-)
NA	NA	NA	NA	NA	NA	NA	NA	NA	NA	0.545	0.614	0.381	0.459	0.599	NA	NA	NA	NA	NA	NA	NA	NA	NA	NA	NA	NA	NA	NA	NA	NP_003743-AN1-7-chr16_260_264_271	NP_003743-AN1-7-chr16-28726755-28734472-stop327-whim30	1	1	EIF3C	8.96	2.21	1	5	260	AN1	frameshift-truncation	+	260	326	264		(R)	APTTDEDK	(K)
NA	NA	NA	NA	NA	NA	NA	NA	NA	NA	-0.324	-0.209	-0.177	-0.005	-0.385	NA	NA	NA	NA	NA	NA	NA	NA	NA	NA	NA	NA	NA	NA	NA	NP_056014-AN2-24-chr3_155_173_187	NP_056014-AN2-24-chr3-15777003-15778539-stop188-whim2	1	1	ANKRD28	8.96	6.29	1	1	155	AN2	frameshift-truncation	-	155	187	173		(K)	IGVLSIGQHIWVTLK	(-)
NA	NA	NA	NA	NA	NA	NA	NA	NA	NA	NA	NA	NA	NA	NA	NA	NA	NA	NA	NA	0.415	-0.124	-0.137	0.416	0.231	NA	NA	NA	NA	NA	NP_000170-AN1-3-chr2_210_522_536	NP_000170-AN1-3-chr2-48023202-48026976-stop656-whim2	1	1	MSH6	8.92	8.92	1	1	210	AN1	frameshift-truncation	+	210	655	522		(K)	AGFDSDYDQALADIR	(E)
NA	NA	NA	NA	NA	NA	NA	NA	NA	NA	NA	NA	NA	NA	NA	NA	NA	NA	NA	NA	NA	NA	NA	NA	NA	0.25	0.064	0.474	0.095	0.216	NP_002815-AN1-2-chr12_40_51_65	NP_002815-AN1-2-chr12-6878840-6879009-stop129-whim12	1	1	PTMS	8.92	8.92	6	300	40	AN1	insertion	+	40	91	51		(K)	ACSQPEATPSPGPHR	(R)
NA	NA	NA	NA	NA	NA	NA	NA	NA	NA	NA	NA	NA	NA	NA	NA	NA	NA	NA	NA	0.058	0.139	0.147	0.108	-0.306	NA	NA	NA	NA	NA	NP_001152794-AN2-5-chr19_379_382_392	NP_001152794-AN2-5-chr19-48565452-48571047-stop450-whim30	1	1	PLA2G4C	8.9	4.82	1	6	379	AN2	frameshift-truncation	-	379	449	382		(K)	QLILFLPGHHR	(W)
NA	NA	NA	NA	NA	0.533	0.148	0.18	-0.046	0.035	NA	NA	NA	NA	NA	NA	NA	NA	NA	NA	NA	NA	NA	NA	NA	NA	NA	NA	NA	NA	NP_001278-AN2-21-chr16_162_181_196	NP_001278-AN2-21-chr16-1510556-1510816-stop373-whim4	1	1	CLCN7	8.87	3.84	1	3	162	AN2	frameshift-truncation	-	162	372	181		(R)	TVLLPVAVGHAERRLR	(A)
-0.422	0.199	0.057	0.026	0.081	NA	NA	NA	NA	NA	NA	NA	NA	NA	NA	NA	NA	NA	NA	NA	NA	NA	NA	NA	NA	NA	NA	NA	NA	NA	NP_112533-A-4-6_205_201_211	NP_112533-A-4-6-chr7-26235529-26236176-81-whim12	1	1	HNRNPA2B1	8.87	8.87		0	205	ISED	inframe-splice-exon-deletion	-			201		(R)	SGRGDGYGSGR	(G)
NA	NA	NA	NA	NA	NA	NA	NA	NA	NA	NA	NA	NA	NA	NA	NA	NA	NA	NA	NA	NA	NA	NA	NA	NA	-0.158	-0.218	-0.365	-0.395	-0.379	NP_060634-A-5-7_417_415_426	NP_060634-A-5-7-chr12-27067061-27068934-171-whim12	1	1	ASUN	8.84	6.7		0	417	ISED	inframe-splice-exon-deletion	-			415		(R)	ITVVPLASVIVK	(E)
NA	NA	NA	NA	NA	NA	NA	NA	NA	NA	NA	NA	NA	NA	NA	0.466	0.3535	-0.113	0.636	0.01	NA	NA	NA	NA	NA	NA	NA	NA	NA	NA	NP_060513-AN1-6-chr11_268_264_272	NP_060513-AN1-6-chr11-69954510-69957231-stop329-whim2	1	1	ANO1	8.83	8.21	4	65	268	AN1	frameshift-truncation	+	268	327	264		(K)	YSMGQGEGR	(K)
NA	NA	NA	NA	NA	NA	NA	NA	NA	NA	NA	NA	NA	NA	NA	-0.166	0.1265	-0.156	-0.278	-0.25	NA	NA	NA	NA	NA	NA	NA	NA	NA	NA	NP_055368-A-9-11_169_163_170	NP_055368-A-9-11-chr2-122000045-122005739-153-whim2	1	1	TFCP2L1	8.8	6.53		0	169	ISED	inframe-splice-exon-deletion	-			163		(R)	ASAFIQPK	(G)
NA	NA	NA	NA	NA	NA	NA	NA	NA	NA	-0.611	-0.759	-0.603	-0.552	-0.636	NA	NA	NA	NA	NA	NA	NA	NA	NA	NA	NA	NA	NA	NA	NA	NP_114129-AN1-2-chr10_141_823_833	NP_114129-AN1-2-chr10-7866523-8005885-stop849-whim2	1	1	TAF3	8.8	8.8	3	12	141	AN1	frameshift-truncation	+	141	848	823		(R)	GPCPAALPGSR	(R)
1.253	1.015	0.722	0.287	1.591	NA	NA	NA	NA	NA	NA	NA	NA	NA	NA	NA	NA	NA	NA	NA	NA	NA	NA	NA	NA	NA	NA	NA	NA	NA	NP_963293-AN2-8-chr14_206_186_215	NP_963293-AN2-8-chr14-21487898-21488078-stop371-whim2	1	1	NDRG2	8.76	8.76	1	10	206	AN2	deletion-short3	-	206	206	186	M196m	(K)	LTGLTSSIPEmILGHLFSQELSGNSELIQK	(Y)
NA	NA	NA	NA	NA	0.025	0.869	-0.228	1.102	0.911	NA	NA	NA	NA	NA	NA	NA	NA	NA	NA	NA	NA	NA	NA	NA	NA	NA	NA	NA	NA	NP_001123917-AN1-7-chr2_238_415_423	NP_001123917-AN1-7-chr2-182765631-182766558-stop486-whim12	1	1	SSFA2	8.71	8.71	3	3	238	AN1	frameshift-truncation	+	238	485	415		(K)	SVHISTPEK	(E)
NA	NA	NA	NA	NA	NA	NA	NA	NA	NA	NA	NA	NA	NA	NA	NA	NA	NA	NA	NA	NA	NA	NA	NA	NA	-0.194	-0.196	-0.335	-0.225	-0.284	NP_003065-A-8-10_634_616_634	NP_003065-A-8-10-chr3-47702945-47712147-259-stop738-whim2	1	1	SMARCC1	8.7	1.49	3	6	634	A	frameshift-truncation	-	634	737	616		(K)	GASAGREWTEQETLLLLER	(S)
-1.305	-0.46	-0.578	-0.07	-0.938	NA	NA	NA	NA	NA	NA	NA	NA	NA	NA	NA	NA	NA	NA	NA	NA	NA	NA	NA	NA	NA	NA	NA	NA	NA	NP_001070675-AN2-4-chr4_1098_1104_1111	NP_001070675-AN2-4-chr4-83745819-83748521-stop1112-whim2	1	1	SEC31A	8.67	8.67	2	3	1098	AN2	frameshift-truncation	-	1098	1111	1104		(K)	NYQETYSR	(-)
NA	NA	NA	NA	NA	NA	NA	NA	NA	NA	NA	NA	NA	NA	NA	NA	NA	NA	NA	NA	-0.469	-0.379	-0.315	-0.291	-0.496	NA	NA	NA	NA	NA	NP_005712-AN1-2-chr2_33_19_33	NP_005712-AN1-2-chr2-114670804-114674474-stop34-whim2	1	1	ACTR3	8.67	8.67	1	7	33	AN1	frameshift-truncation	+	33	33	19		(K)	LGYAGNTEPQFIIPS	(-)
-0.38	-0.302	-0.233	-0.353	-0.661	NA	NA	NA	NA	NA	NA	NA	NA	NA	NA	NA	NA	NA	NA	NA	NA	NA	NA	NA	NA	NA	NA	NA	NA	NA	NP_001265460-AN1-16-chr6_533_544_563	NP_001265460-AN1-16-chr6-170176507-170176610-stop617-whim2	1	1	C6orf70	8.66	6.34	3	4	533	AN1	frameshift-truncation	+	533	616	544		(R)	SISEQCRRVSSQVTVASELR	(H)
NA	NA	NA	NA	NA	NA	NA	NA	NA	NA	NA	NA	NA	NA	NA	NA	NA	NA	NA	NA	0.644	0.348	0.364	0.245	0.597	NA	NA	NA	NA	NA	NP_002151-A-17-19_1072_1069_1091	NP_002151-A-17-19-chr9-117826347-117835881-273-variant-whim30	1	1	TNC	8.66	8.66		0	1072	ISED	inframe-splice-exon-deletion	-			1069		(K)	ASTGETPNLGEVVVAEVGWDALK	(L)
NA	NA	NA	NA	NA	NA	NA	NA	NA	NA	NA	NA	NA	NA	NA	NA	NA	NA	NA	NA	0.106	0.07	0.094	0.208	0.38	NA	NA	NA	NA	NA	NP_005002-AN1-9-chr7_450_473_481	NP_005002-AN1-9-chr7-129367205-129374882-stop482-whim2	1	1	NRF1	8.64	8.64	1	5	450	AN1	frameshift-truncation	+	450	481	473		(K)	STSVSAGQH	(-)
NA	NA	NA	NA	NA	NA	NA	NA	NA	NA	NA	NA	NA	NA	NA	NA	NA	NA	NA	NA	-0.782	-0.601	-0.409	-1.013	-0.976	NA	NA	NA	NA	NA	NP_065715-AN1-4-chr16_114_141_148	NP_065715-AN1-4-chr16-457560-460208-stop161-whim2	1	1	DECR2	8.61	5.74	4	18	114	AN1	frameshift-truncation	+	114	159	141		(R)	LQDRDGHR	(Y)
NA	NA	NA	NA	NA	NA	NA	NA	NA	NA	0.192	0.143	0.112	0.018	0.21	NA	NA	NA	NA	NA	NA	NA	NA	NA	NA	NA	NA	NA	NA	NA	NP_689799-A-6-8_788_778_789	NP_689799-A-6-8-chr10-75279750-75283340-120-variant-whim21	1	1	USP54	8.61	8.61		0	788	ISED	inframe-splice-exon-deletion	-			778		(R)	FMDLDELQNQAK	(L)
-1.987	-1.722	-1.958	-1.836	-1.58	NA	NA	NA	NA	NA	NA	NA	NA	NA	NA	NA	NA	NA	NA	NA	NA	NA	NA	NA	NA	NA	NA	NA	NA	NA	NP_001229785-AN2-5-chr11_21_31_38	NP_001229785-AN2-5-chr11-6500464-6501201-stop53-whim2	1	1	ARFIP2	8.59	3.83	2	12	21	AN2	frameshift-truncation	-	21	52	31		(R)	WLGALLEK	(S)
-0.164	-0.152	-0.062	-0.214	-0.095	NA	NA	NA	NA	NA	NA	NA	NA	NA	NA	NA	NA	NA	NA	NA	NA	NA	NA	NA	NA	NA	NA	NA	NA	NA	NP_001185986-AN2-3-chr15_88_82_101	NP_001185986-AN2-3-chr15-83207116-83207630-stop134-whim2	1	1	RPS17L	8.58	8.58	1	8	88	AN2	deletion-short3	-	88	88	82		(R)	DNYVPEALDQEIIEVDPDTK	(E)
0.528	0.17	0.418	-0.091	0.683	NA	NA	NA	NA	NA	NA	NA	NA	NA	NA	NA	NA	NA	NA	NA	NA	NA	NA	NA	NA	NA	NA	NA	NA	NA	NP_071358-A-3-6_175_166_184	NP_071358-A-3-6-chr1-150939338-150940139-222-whim30	1	1	CERS2	8.58	8.58		0	175	ISED	inframe-splice-exon-deletion	-			166		(K)	VWEGYPIQSAKMFNYAGWK	(N)
NA	NA	NA	NA	NA	NA	NA	NA	NA	NA	NA	NA	NA	NA	NA	-0.11	-0.0675	-0.007	-0.02	-0.018	NA	NA	NA	NA	NA	NA	NA	NA	NA	NA	NP_038479-A-41-46_282_273_289	NP_038479-A-41-46-chr10-95157213-95163779-378-whim12	1	1	MYOF	8.56	5.16		0	282	ISED	inframe-splice-exon-deletion	-			273	M277m	(R)	ADCLmGEFKVCTNIIEK	(N)
1.237	1.074	0.973	0.803	1.236	NA	NA	NA	NA	NA	NA	NA	NA	NA	NA	NA	NA	NA	NA	NA	NA	NA	NA	NA	NA	NA	NA	NA	NA	NA	NP_001356-A-13-15_213_209_222	NP_001356-A-13-15-chr17-7106366-7106742-137-stop223-whim30	1	1	DLG4	8.54	2.43	1	1	213	A	frameshift-truncation	-	213	222	209		(K)	GPKGQQCGARGRHA	(-)
NA	NA	NA	NA	NA	NA	NA	NA	NA	NA	-0.354	0.311	-0.004	-0.496	-0.823	NA	NA	NA	NA	NA	NA	NA	NA	NA	NA	NA	NA	NA	NA	NA	NP_076915-AN1-11-chr5_548_576_583	NP_076915-AN1-11-chr5-7893026-7893619-stop586-whim12	1	1	MTRR	8.54	8.54	5	12	548	AN1	frameshift-truncation	+	548	585	576	Q576q	(R)	qQFKVVHK	(N)
NA	NA	NA	NA	NA	NA	NA	NA	NA	NA	NA	NA	NA	NA	NA	NA	NA	NA	NA	NA	NA	NA	NA	NA	NA	0.301	0.231	0.147	0.383	0.557	NP_003176-AN2-11-chr20_629_622_639	NP_003176-AN2-11-chr20-60582680-60584107-stop1082-whim2	1	1	TAF4	8.54	3.59	2	3	629	AN2	deletion	-	629	629	622		(K)	ELVQNLLEAEDFTSRLYR	(E)
NA	NA	NA	NA	NA	NA	NA	NA	NA	NA	NA	NA	NA	NA	NA	0.077	-0.0665	-0.051	-0.033	0.334	NA	NA	NA	NA	NA	NA	NA	NA	NA	NA	NP_006303-A-29-31_674_865_879	NP_006303-A-29-31-chr12-124859009-124870290-148-stop914-whim2	1	1	NCOR2	8.54	2.82	1	1	674	A	frameshift-truncation	-	674	913	865	M878m	(R)	TATPVLPAVQTRWmR	(P)
NA	NA	NA	NA	NA	NA	NA	NA	NA	NA	NA	NA	NA	NA	NA	NA	NA	NA	NA	NA	-0.068	0.041	0.047	-0.098	-0.019	NA	NA	NA	NA	NA	NP_001035957-AN1-36-chr17_1613_1601_1618	NP_001035957-AN1-36-chr17-29592357-29624008-stop1636-whim30	1	1	NF1	8.49	5.26	1	2	1613	AN1	frameshift-truncation	+	1613	1635	1601		(K)	AGNPIFYYVARRVTECIK	(N)
NA	NA	NA	NA	NA	NA	NA	NA	NA	NA	NA	NA	NA	NA	NA	NA	NA	NA	NA	NA	NA	NA	NA	NA	NA	0.228	0.551	0.155	0.526	1.324	NP_001014763-AN2-4-chr19_217_216_232	NP_001014763-AN2-4-chr19-51853668-51856385-stop236-whim12	1	1	ETFB	8.49	1.78	1	1	217	AN2	frameshift-truncation	-	217	235	216	M228m	(K)	QVFCLSPFRPSMmTVTR	(Q)
NA	NA	NA	NA	NA	NA	NA	NA	NA	NA	NA	NA	NA	NA	NA	0.711	0.6295	0.108	0.622	0.247	NA	NA	NA	NA	NA	NA	NA	NA	NA	NA	NP_005796-AN1-5-chr2_155_169_184	NP_005796-AN1-5-chr2-162227833-162228506-stop212-whim12	1	1	PSMD14	8.48	8.48	4	8	155	AN1	frameshift-truncation	+	155	211	169		(R)	EQLYYHLHRAVCKCER	(Q)
NA	NA	NA	NA	NA	NA	NA	NA	NA	NA	NA	NA	NA	NA	NA	-4.431	-1.4955	1.423	-2.204	1.436	NA	NA	NA	NA	NA	NA	NA	NA	NA	NA	NP_005135-AN2-12-chr8_708_725_733	NP_005135-AN2-12-chr8-21979205-21980005-stop740-whim2	1	1	HR	8.44	8.44	3	8	708	AN2	frameshift-truncation	-	708	739	725		(R)	HPQDQEHQR	(G)
NA	NA	NA	NA	NA	NA	NA	NA	NA	NA	0.294	0.113	-0.161	-0.474	-0.067	NA	NA	NA	NA	NA	NA	NA	NA	NA	NA	NA	NA	NA	NA	NA	NP_079422-AN2-3-chr3_90_95_108	NP_079422-AN2-3-chr3-113440775-113442268-stop117-whim2	1	1	NAA50	8.44	2.16	1	1	90	AN2	frameshift-truncation	-	90	116	95		(R)	QLTSTGSLALRLLR	(Q)
NA	NA	NA	NA	NA	NA	NA	NA	NA	NA	NA	NA	NA	NA	NA	NA	NA	NA	NA	NA	-0.067	0.031	-0.345	-0.11	-0.041	NA	NA	NA	NA	NA	NP_055929-AN2-4-chr12_632_1024_1032	NP_055929-AN2-4-chr12-133310386-133310970-stop1239-whim2	1	1	ANKLE2	8.43	6.36	3	2	632	AN2	frameshift-extension	-	632	1238	1024		(R)	HQDAESFTR	(C)
NA	NA	NA	NA	NA	NA	NA	NA	NA	NA	-0.507	-0.292	-0.32	-0.413	-0.742	NA	NA	NA	NA	NA	NA	NA	NA	NA	NA	NA	NA	NA	NA	NA	NP_009173-AN1-8-chr16_263_304_313	NP_009173-AN1-8-chr16-70363372-70363718-stop352-whim2	1	1	DDX19B	8.41	4.64	2	2	263	AN1	frameshift-truncation	+	263	351	304		(K)	REEETLDTIK	(Q)
NA	NA	NA	NA	NA	NA	NA	NA	NA	NA	NA	NA	NA	NA	NA	NA	NA	NA	NA	NA	-2.487	-2.323	-2.001	-2.56	-2.297	NA	NA	NA	NA	NA	NP_006524-AN1-2-chr19_88_108_116	NP_006524-AN1-2-chr19-41281790-41282879-stop173-whim30	1	1	MIA	8.38	8.38	1	1	88	AN1	frameshift-extension	+	88	172	108		(R)	EDQTLKPGK	(V)
NA	NA	NA	NA	NA	NA	NA	NA	NA	NA	NA	NA	NA	NA	NA	NA	NA	NA	NA	NA	NA	NA	NA	NA	NA	-0.025	-0.045	-0.193	-0.115	-0.185	NP_036205-AN1-7-chr5_332_342_349	NP_036205-AN1-7-chr5-10261023-10261758-stop367-whim2	1	1	CCT5	8.37	8.37	1	2	332	AN1	frameshift-truncation	+	332	366	342	M342m	(K)	mLVIEQCK	(N)
NA	NA	NA	NA	NA	NA	NA	NA	NA	NA	-0.006	-0.488	0.313	-0.393	-0.128	NA	NA	NA	NA	NA	NA	NA	NA	NA	NA	NA	NA	NA	NA	NA	NP_775864-AN1-13-chr12_424_560_574	NP_775864-AN1-13-chr12-661694-662356-stop715-whim2	1	1	B4GALNT3	8.34	8.34	5	171	424	AN1	frameshift-truncation	+	424	714	560		(K)	TQWLNQVESYIAEQR	(R)
NA	NA	NA	NA	NA	NA	NA	NA	NA	NA	NA	NA	NA	NA	NA	0.165	0.2445	0.077	0.202	-0.049	NA	NA	NA	NA	NA	NA	NA	NA	NA	NA	NP_001005476-AN1-7-chr2_448_445_454	NP_001005476-AN1-7-chr2-159488453-159490584-stop526-whim12	1	1	PKP4	8.33	5.43	6	124	448	AN1	frameshift-truncation	+	448	525	445		(R)	TGSGIGNLQR	(T)
NA	NA	NA	NA	NA	NA	NA	NA	NA	NA	NA	NA	NA	NA	NA	0.726	0.7575	0.51	0.607	0.579	NA	NA	NA	NA	NA	NA	NA	NA	NA	NA	NP_031396-A-5-10_142_141_148	NP_031396-A-5-10-chr12-118460164-118467575-450-whim2	1	1	RFC5	8.33	4.21		0	142	ISED	inframe-splice-exon-deletion	+			141		(R)	VDFPSSVR	(I)
NA	NA	NA	NA	NA	NA	NA	NA	NA	NA	NA	NA	NA	NA	NA	NA	NA	NA	NA	NA	NA	NA	NA	NA	NA	0.982	1.016	0.886	0.769	1.138	NP_036442-AN1-22-chrX_874_924_942	NP_036442-AN1-22-chrX-69622545-69623734-stop947-whim2	1	1	KIF4A	8.32	1.33	1	2	874	AN1	frameshift-truncation	+	874	946	924		(K)	GAVPSQPAAAKPNGREAVR	(G)
NA	NA	NA	NA	NA	NA	NA	NA	NA	NA	NA	NA	NA	NA	NA	1.811	1.6265	2.089	1.938	2.029	NA	NA	NA	NA	NA	NA	NA	NA	NA	NA	NP_001099010-A-11-14_526_524_540	NP_001099010-A-11-14-chr11-46394060-46394510-175-stop624-whim2	1	1	DGKZ	8.29	6.97	1	1	526	A	frameshift-truncation	+	526	623	524		(K)	EAATQMSLCPRSSPTWR	(R)
1.233	1.21	1.147	0.721	1.52	NA	NA	NA	NA	NA	NA	NA	NA	NA	NA	NA	NA	NA	NA	NA	NA	NA	NA	NA	NA	NA	NA	NA	NA	NA	NP_001137498-AN1-6-chr9_241_256_272	NP_001137498-AN1-6-chr9-140108865-140109207-stop297-whim30	1	1	NDOR1	8.28	8.28	1	4	241	AN1	frameshift-truncation	+	241	296	256		(R)	CLLPHEAAPALLHAAPR	(V)
NA	NA	NA	NA	NA	NA	NA	NA	NA	NA	NA	NA	NA	NA	NA	NA	NA	NA	NA	NA	0.046	-0.222	-0.048	-0.269	-0.084	NA	NA	NA	NA	NA	NP_060016-AN1-3-chr2_278_315_322	NP_060016-AN1-3-chr2-101879153-101881321-stop344-whim2	1	1	CNOT11	8.28	4.72	2	3	278	AN1	frameshift-truncation	+	278	343	315		(K)	NSTGVEIK	(R)
NA	NA	NA	NA	NA	NA	NA	NA	NA	NA	NA	NA	NA	NA	NA	NA	NA	NA	NA	NA	-0.058	-0.012	-0.137	0.096	0.025	NA	NA	NA	NA	NA	NP_001107604-AN1-7-chr2_229_298_310	NP_001107604-AN1-7-chr2-203942560-203947911-stop352-whim2	1	1	NBEAL1	8.25	7.93	1	2	229	AN1	frameshift-truncation	+	229	351	298		(R)	QVETSTILENYFK	(L)
NA	NA	NA	NA	NA	NA	NA	NA	NA	NA	NA	NA	NA	NA	NA	0.3	0.3755	0.371	0.205	0.341	NA	NA	NA	NA	NA	NA	NA	NA	NA	NA	NP_003336-AN1-3-chr16_74_62_74	NP_003336-AN1-3-chr16-1365727-1369702-stop75-whim12	1	1	UBE2I	8.25	8.25	5	19	74	AN1	frameshift-truncation	+	74	74	62	M62m	(R)	mLFKDDYPSSPPK	(-)
0.098	0.49	0.265	0.255	0.319	NA	NA	NA	NA	NA	NA	NA	NA	NA	NA	NA	NA	NA	NA	NA	NA	NA	NA	NA	NA	NA	NA	NA	NA	NA	NP_055428-AN1-8-chr5_281_317_326	NP_055428-AN1-8-chr5-175923664-175925923-stop350-whim2	1	1	FAF2	8.25	5.07	1	1	281	AN1	frameshift-truncation	+	281	349	317		(R)	RKEEEVQQQK	(L)
NA	NA	NA	NA	NA	NA	NA	NA	NA	NA	-0.215	-0.307	-0.437	-0.219	0.035	NA	NA	NA	NA	NA	NA	NA	NA	NA	NA	NA	NA	NA	NA	NA	NP_000370-AN2-27-chr2_297_327_334	NP_000370-AN2-27-chr2-31606179-31606620-stop335-whim2	1	1	XDH	8.24	8.24	1	8	297	AN2	frameshift-truncation	-	297	334	327		(R)	GAVHESLF	(-)
NA	NA	NA	NA	NA	NA	NA	NA	NA	NA	NA	NA	NA	NA	NA	NA	NA	NA	NA	NA	0.175	-0.107	-0.172	-0.383	-0.019	NA	NA	NA	NA	NA	NP_510880-A-21-41_334_329_337	NP_510880-A-21-41-chr17-27426780-27492959-2508-whim2	1	1	MYO18A	8.24	8.24		0	334	ISED	inframe-splice-exon-deletion	-			329		(R)	REPSDVFFR	(A)
NA	NA	NA	NA	NA	NA	NA	NA	NA	NA	NA	NA	NA	NA	NA	NA	NA	NA	NA	NA	NA	NA	NA	NA	NA	-0.17	-0.29	-0.251	-0.115	-0.236	NP_000072-A-29-32_2085_2064_2087	NP_000072-A-29-32-chr1-235918947-235926019-806-stop2092-whim2	1	1	LYST	8.22	1.8	1	2	2085	A	frameshift-truncation	-	2085	2091	2064		(R)	SLMSPGFMVISPSGFTASPYEAIR	(C)
NA	NA	NA	NA	NA	0.579	0.03	0.229	-0.185	-0.211	NA	NA	NA	NA	NA	NA	NA	NA	NA	NA	NA	NA	NA	NA	NA	NA	NA	NA	NA	NA	NP_001262-AN1-2-chr15_99_98_107	NP_001262-AN1-2-chr15-93467782-93470531-stop1810-whim2	1	1	CHD2	8.2	0.51	1	3	99	AN1	deletion	+	99	108	98		(K)	KNHRDLILRK	(R)
NA	NA	NA	NA	NA	1.078	1.201	1.031	1.096	0.817	NA	NA	NA	NA	NA	NA	NA	NA	NA	NA	NA	NA	NA	NA	NA	NA	NA	NA	NA	NA	NP_002030-A-2-4_123_136_146	NP_002030-A-2-4-chr4-144336924-144359151-226-stop157-whim30	1	1	GAB1	8.2	5.65	1	1	123	A	frameshift-truncation	+	123	156	136		(K)	QTAMITSLLIK	(I)
1.388	1.582	1.436	0.286	1.372	NA	NA	NA	NA	NA	NA	NA	NA	NA	NA	NA	NA	NA	NA	NA	NA	NA	NA	NA	NA	NA	NA	NA	NA	NA	NP_003790-AN1-9-chr18_465_482_489	NP_003790-AN1-9-chr18-13754146-13757212-stop513-whim2	1	1	RNMT	8.2	3.47	1	5	465	AN1	frameshift-extension	+	465	512	482		(K)	IGVAVAVK	(T)
NA	NA	NA	NA	NA	NA	NA	NA	NA	NA	NA	NA	NA	NA	NA	NA	NA	NA	NA	NA	0.534	0.946	0.767	0.695	0.606	NA	NA	NA	NA	NA	NP_079225-AN1-15-chr4_801_797_805	NP_079225-AN1-15-chr4-184190316-184190914-stop816-whim30	1	1	WWC2	8.2	3.43	1	5	801	AN1	frameshift-truncation	+	801	815	797		(R)	EECLYWSFR	(E)
NA	NA	NA	NA	NA	NA	NA	NA	NA	NA	NA	NA	NA	NA	NA	0.034	0.0435	-0.588	-0.102	-0.305	NA	NA	NA	NA	NA	NA	NA	NA	NA	NA	NP_055855-AN1-34-chr2_1793_1801_1809	NP_055855-AN1-34-chr2-209212747-209215503-stop1849-whim2	1	1	PIKFYVE	8.17	4.78	1	1	1793	AN1	frameshift-truncation	+	1793	1848	1801		(R)	LYYAGEFHK	(M)
NA	NA	NA	NA	NA	NA	NA	NA	NA	NA	NA	NA	NA	NA	NA	NA	NA	NA	NA	NA	NA	NA	NA	NA	NA	NA	NA	NA	NA	NA	NP_057192-AN1-5-chr6_227_232_239	NP_057192-AN1-5-chr6-143654582-143656187-stop240-whim12	1	1	AIG1	8.17	8.17	4	27	227	AN1	frameshift-extension	+	227	239	232		(K)	FMYLGPSS	(-)
NA	NA	NA	NA	NA	NA	NA	NA	NA	NA	-0.058	0.055	0.189	0.432	0.297	NA	NA	NA	NA	NA	NA	NA	NA	NA	NA	NA	NA	NA	NA	NA	NP_006544-AN1-4-chr18_122_134_145	NP_006544-AN1-4-chr18-12427110-12427183-stop177-whim2	1	1	SLMO1	8.14	8.14	2	2	122	AN1	frameshift-extension	+	122	176	134		(R)	TVLTQEAIITVK	(G)
NA	NA	NA	NA	NA	1.05	-0.34	0.753	-0.608	-1.212	NA	NA	NA	NA	NA	NA	NA	NA	NA	NA	NA	NA	NA	NA	NA	NA	NA	NA	NA	NA	NP_689957-AN1-38-chr7_1847_1856_1865	NP_689957-AN1-38-chr7-4249794-4250126-stop1887-whim30	1	1	SDK1	8.11	0.83	1	1	1847	AN1	frameshift-truncation	+	1847	1886	1856		(R)	DHPGFHLKPR	(L)
0.914	1.067	1.002	0.176	1.167	NA	NA	NA	NA	NA	NA	NA	NA	NA	NA	NA	NA	NA	NA	NA	NA	NA	NA	NA	NA	NA	NA	NA	NA	NA	NP_001074008-A-22-26_853_849_862	NP_001074008-A-22-26-chr2-197590823-197595582-426-variant-whim2	1	1	CCDC150	8.08	3.02		0	853	ISED	inframe-splice-exon-deletion	+			849		(R)	EVAEELEETVRHLK	(K)
NA	NA	NA	NA	NA	NA	NA	NA	NA	NA	NA	NA	NA	NA	NA	NA	NA	NA	NA	NA	0.567	0.658	0.593	0.784	0.329	NA	NA	NA	NA	NA	NP_055690-A-9-11_1113_1113_1120	NP_055690-A-9-11-chr1-200544819-200550328-130-stop1150-whim30	1	1	KIF14	8.08	2.56	1	1	1113	A	frameshift-truncation	-	1113	1149	1113		(R)	VMVVTGVK	(M)
NA	NA	NA	NA	NA	NA	NA	NA	NA	NA	NA	NA	NA	NA	NA	-0.108	-0.0095	0.096	-0.296	0.025	NA	NA	NA	NA	NA	NA	NA	NA	NA	NA	NP_079540-AN2-3-chr2_360_373_385	NP_079540-AN2-3-chr2-39978331-39982434-stop391-whim2	1	1	THUMPD2	8.06	8.06	1	2	360	AN2	frameshift-truncation	-	360	390	373		(K)	IHEAARLPIWEIR	(G)
0.218	0.257	0.218	0.693	0.034	NA	NA	NA	NA	NA	NA	NA	NA	NA	NA	NA	NA	NA	NA	NA	NA	NA	NA	NA	NA	NA	NA	NA	NA	NA	NP_689525-AN1-12-chr11_651_641_654	NP_689525-AN1-12-chr11-45949923-45950266-stop655-whim2	1	1	GYLTL1B	8.06	5.28	1	2	651	AN1	frameshift-truncation	+	651	654	641		(K)	VAHIVELDAQPHLS	(-)
NA	NA	NA	NA	NA	NA	NA	NA	NA	NA	-0.315	-0.106	-0.162	-0.175	-0.309	NA	NA	NA	NA	NA	NA	NA	NA	NA	NA	NA	NA	NA	NA	NA	NP_073590-AN1-1-chr1_278_297_304	NP_073590-AN1-1-chr1-33292531-33293596-stop308-whim12	1	1	S100PBP	8.04	3.6	6	67	278	AN1	frameshift-truncation	+	278	307	297		(K)	VIPVLQTK	(T)
NA	NA	NA	NA	NA	0.033	0.399	0.006	1.06	1.031	NA	NA	NA	NA	NA	NA	NA	NA	NA	NA	NA	NA	NA	NA	NA	NA	NA	NA	NA	NA	NP_001139540-A-9-11_301_346_355	NP_001139540-A-9-11-chr1-223940658-223945070-170-stop369-whim2	1	1	CAPN2	8.02	1.03	1	14	301	A	frameshift-truncation	+	301	368	346		(R)	RVHSRAFHLR	(T)
NA	NA	NA	NA	NA	NA	NA	NA	NA	NA	NA	NA	NA	NA	NA	NA	NA	NA	NA	NA	0.825	1.235	1.23	0.811	0.233	NA	NA	NA	NA	NA	NP_002309-AN2-10-chr8_323_374_381	NP_002309-AN2-10-chr8-23186100-23190913-stop406-whim12	1	1	LOXL2	8.01	2.66	4	70	323	AN2	frameshift-truncation	-	323	404	374		(R)	AGLWECQR	(G)
NA	NA	NA	NA	NA	NA	NA	NA	NA	NA	NA	NA	NA	NA	NA	NA	NA	NA	NA	NA	-0.839	-0.571	-0.708	-0.287	-0.791	NA	NA	NA	NA	NA	NP_005541-A-16-18_60_55_66	NP_005541-A-16-18-chr16-57806200-57831983-143-stop67-whim30	1	1	KIFC3	8.01	8.01	1	3	60	A	frameshift-truncation	-	60	66	55		(R)	LRTGRTPEGEAH	(-)
NA	NA	NA	NA	NA	NA	NA	NA	NA	NA	NA	NA	NA	NA	NA	NA	NA	NA	NA	NA	0.293	0.153	0.303	0.469	0.86	NA	NA	NA	NA	NA	NP_079524-AN2-2-chr17_1140_1230_1254	NP_079524-AN2-2-chr17-36699942-36700057-stop1268-whim2	1	1	SRCIN1	8.01	8.01	1	1	1140	AN2	frameshift-extension	-	1140	1267	1230		(R)	GILWPSASCHSVSLSASLSLFPGLR	(L)
NA	NA	NA	NA	NA	0.519	1.157	0.514	1.438	0.951	NA	NA	NA	NA	NA	NA	NA	NA	NA	NA	NA	NA	NA	NA	NA	NA	NA	NA	NA	NA	NP_001257411-A-8-11_284_283_292	NP_001257411-A-8-11-chr17-30801842-30806868-189-whim12	1	1	PSMD11	8	8		0	284	ISED	inframe-splice-exon-deletion	+			283		(R)	QIEHISSLIK	(L)
NA	NA	NA	NA	NA	NA	NA	NA	NA	NA	NA	NA	NA	NA	NA	0.147	0.3155	0.119	0.203	0.203	NA	NA	NA	NA	NA	NA	NA	NA	NA	NA	NP_055889-A-43-45_1653_1635_1653	NP_055889-A-43-45-chr1-10434523-10435312-193-stop1677-whim2	1	1	KIF1B	8	8	4	15	1653	A	frameshift-truncation	+	1653	1676	1635		(R)	AGKNEFLNLVPDIEEIRPR	(H)
NA	NA	NA	NA	NA	NA	NA	NA	NA	NA	NA	NA	NA	NA	NA	NA	NA	NA	NA	NA	NA	NA	NA	NA	NA	0.552	-1.111	0.586	-1.349	-0.985	NP_149111-AN1-8-chr5_223_451_458	NP_149111-AN1-8-chr5-1035588-1036224-stop579-whim2	1	1	NKD2	8	3.91	2	5	223	AN1	frameshift-extension	+	223	578	451		(R)	SACHSGAR	(G)
-0.223	-0.344	-0.188	-0.411	0.032	NA	NA	NA	NA	NA	NA	NA	NA	NA	NA	NA	NA	NA	NA	NA	NA	NA	NA	NA	NA	NA	NA	NA	NA	NA	NP_150279-AN1-9-chr3_605_662_671	NP_150279-AN1-9-chr3-112997630-112998101-stop724-whim2	1	1	BOC	8	5.06	2	8	605	AN1	frameshift-truncation	+	605	723	662		(R)	LSVEITGLEK	(G)
NA	NA	NA	NA	NA	NA	NA	NA	NA	NA	NA	NA	NA	NA	NA	NA	NA	NA	NA	NA	-0.003	0.108	0.105	0.028	-0.069	NA	NA	NA	NA	NA	NP_001839-AN1-19-chr21_446_443_452	NP_001839-AN1-19-chr21-47412724-47413674-stop454-whim30	1	1	COL6A1	7.99	0.43	1	13	446	AN1	frameshift-truncation	+	446	453	443		(R)	GDPAHSSEIR	(I)
NA	NA	NA	NA	NA	0.248	0.489	0.427	0.166	0.323	NA	NA	NA	NA	NA	NA	NA	NA	NA	NA	NA	NA	NA	NA	NA	NA	NA	NA	NA	NA	NP_001028198-AN2-10-chr19_170_188_197	NP_001028198-AN2-10-chr19-1013399-1014190-stop641-whim12	1	1	TMEM259	7.95	5.61	6	33	170	AN2	insertion	-	170	189	188		(R)	PQFELDIEPK	(V)
NA	NA	NA	NA	NA	NA	NA	NA	NA	NA	NA	NA	NA	NA	NA	NA	NA	NA	NA	NA	0.193	0.023	-0.163	-0.056	0.135	NA	NA	NA	NA	NA	NP_060058-AN1-12-chr9_302_297_314	NP_060058-AN1-12-chr9-137021715-137021952-stop315-whim2	1	1	WDR5	7.93	7.51	3	4	302	AN1	frameshift-truncation	+	302	314	297		(K)	LQGHTGMLVRKVCVAVGL	(-)
NA	NA	NA	NA	NA	0.03	0.374	0.363	0.297	0.281	NA	NA	NA	NA	NA	NA	NA	NA	NA	NA	NA	NA	NA	NA	NA	NA	NA	NA	NA	NA	NP_001193987-AN2-7-chr15_233_229_243	NP_001193987-AN2-7-chr15-65889933-65890658-stop244-whim12	1	1	VWA9	7.89	3.51	2	2	233	AN2	frameshift-truncation	-	233	243	229		(K)	VINTGTAAYIMTERK	(-)
NA	NA	NA	NA	NA	NA	NA	NA	NA	NA	NA	NA	NA	NA	NA	NA	NA	NA	NA	NA	0.358	0.603	0.679	0.49	0.65	NA	NA	NA	NA	NA	NP_001244965-AN1-2-chr16_30_25_32	NP_001244965-AN1-2-chr16-22316527-22316699-stop63-whim2	1	1	POLR3E	7.89	2.58	1	1	30	AN1	frameshift-truncation	+	30	62	25	M30m	(K)	LYLFQmGK	(L)
NA	NA	NA	NA	NA	NA	NA	NA	NA	NA	NA	NA	NA	NA	NA	NA	NA	NA	NA	NA	0.051	0.182	-0.127	-0.004	0.164	NA	NA	NA	NA	NA	NP_060352-AN2-3-chr15_182_240_254	NP_060352-AN2-3-chr15-68502957-68503600-stop307-whim4	1	1	CLN6	7.88	6.15	1	1	182	AN2	frameshift-truncation	-	182	306	240		(R)	VPGQASCHLSLAFAR	(A)
0.1	-0.113	-0.493	-0.64	-0.027	NA	NA	NA	NA	NA	NA	NA	NA	NA	NA	NA	NA	NA	NA	NA	NA	NA	NA	NA	NA	NA	NA	NA	NA	NA	NP_078932-AN1-10-chr19_466_479_486	NP_078932-AN1-10-chr19-17690418-17691277-stop534-whim2	1	1	COLGALT1	7.88	6.6	1	2	466	AN1	frameshift-truncation	+	466	533	479		(K)	LTLLPHDR	(Q)
NA	NA	NA	NA	NA	NA	NA	NA	NA	NA	NA	NA	NA	NA	NA	NA	NA	NA	NA	NA	NA	NA	NA	NA	NA	-0.118	0.476	0.631	0.481	0.841	NP_997279-AN1-13-chr1_495_490_499	NP_997279-AN1-13-chr1-6272476-6272727-stop640-whim2	1	1	RNF207	7.88	7.88	5	94	495	AN1	insertion	+	495	516	490		(R)	VVFQELFSFR	(F)
NA	NA	NA	NA	NA	NA	NA	NA	NA	NA	NA	NA	NA	NA	NA	NA	NA	NA	NA	NA	NA	NA	NA	NA	NA	0.054	0.347	0.163	0.081	0.548	NP_071348-AN2-9-chr2_1449_1449_1456	NP_071348-AN2-9-chr2-43565075-43571260-stop1486-whim30	1	1	THADA	7.87	5.47	1	1	1449	AN2	frameshift-truncation	-	1449	1485	1449		(R)	FYHLCISK	(N)
0.498	0.148	-0.12	0.211	0.906	NA	NA	NA	NA	NA	NA	NA	NA	NA	NA	NA	NA	NA	NA	NA	NA	NA	NA	NA	NA	NA	NA	NA	NA	NA	NP_001230-AN2-7-chr5_106_89_111	NP_001230-AN2-7-chr5-86703953-86705106-stop124-whim12	1	1	CCNH	7.85	4.35	2	1	106	AN2	frameshift-truncation	-	106	123	89	M97m M105m	(K)	RFYLNNSVmEYHPRIImSSVCWK	(P)
NA	NA	NA	NA	NA	NA	NA	NA	NA	NA	1.207	0.902	0.937	0.858	0.981	NA	NA	NA	NA	NA	NA	NA	NA	NA	NA	NA	NA	NA	NA	NA	NP_004759-AN1-11-chr1_420_417_428	NP_004759-AN1-11-chr1-70716186-70716262-stop435-whim2	1	1	SRSF11	7.82	3.23	1	1	420	AN1	frameshift-truncation	+	420	434	417		(K)	DVKFTFIILLGK	(A)
NA	NA	NA	NA	NA	NA	NA	NA	NA	NA	NA	NA	NA	NA	NA	NA	NA	NA	NA	NA	NA	NA	NA	NA	NA	NA	NA	NA	NA	NA	NP_001246-AN1-3-chr1_143_162_179	NP_001246-AN1-3-chr1-43825492-43825620-stop186-whim6	1	1	CDC20	7.8	0.39	1	2	143	AN1	frameshift-truncation	+	143	185	162		(K)	GHSWLQPEDLPLHSFPAR	(P)
NA	NA	NA	NA	NA	NA	NA	NA	NA	NA	NA	NA	NA	NA	NA	1.334	1.3425	1.144	1.18	1.281	NA	NA	NA	NA	NA	NA	NA	NA	NA	NA	NP_006258-AN1-19-chr2_901_1066_1079	NP_006258-AN1-19-chr2-109378651-109382620-stop1648-whim12	1	1	RANBP2	7.8	5.35	6	16	901	AN1	frameshift-truncation	+	901	1647	1066		(K)	LFRFDAEVSQWKER	(G)
NA	NA	NA	NA	NA	NA	NA	NA	NA	NA	NA	NA	NA	NA	NA	NA	NA	-1.516	NA	-1.276	NA	NA	NA	NA	NA	NA	NA	NA	NA	NA	NP_758862-AN1-4-chr1_159_154_166	NP_758862-AN1-4-chr1-207933069-207934595-stop175-whim2	1	1	CD46	7.8	1.97	2	12	159	AN1	frameshift-truncation	+	159	173	154		(K)	PPICESFVYTTSK	(N)
NA	NA	NA	NA	NA	0.987	-0.108	0.459	-0.297	-0.674	NA	NA	NA	NA	NA	NA	NA	NA	NA	NA	NA	NA	NA	NA	NA	NA	NA	NA	NA	NA	NP_060244-A-1-3_58_65_74	NP_060244-A-1-3-chr6-20546754-20649523-113-stop78-whim12	1	1	CDKAL1	7.78	1.13	4	18	58	A	frameshift-truncation	+	58	77	65		(R)	FMAPEQLHCK	(K)
NA	NA	NA	NA	NA	NA	NA	NA	NA	NA	NA	NA	NA	NA	NA	0.318	0.2135	0.107	0.533	0.097	NA	NA	NA	NA	NA	NA	NA	NA	NA	NA	NP_004915-AN1-11-chr19_432_448_458	NP_004915-AN1-11-chr19-39208714-39209389-stop510-whim21	1	1	ACTN4	7.77	2.86	1	2	432	AN1	frameshift-truncation	+	432	508	448		(R)	VGFPLPHLCER	(G)
NA	NA	NA	NA	NA	-0.099	0.356	-0.068	0.75	0.43	NA	NA	NA	NA	NA	NA	NA	NA	NA	NA	NA	NA	NA	NA	NA	NA	NA	NA	NA	NA	NP_631947-A-2-4_79_190_205	NP_631947-A-2-4-chr1-11105596-11106947-178-stop224-whim21	1	2	MASP2	7.77	2.26	1	1	79	A	frameshift-extension	-	79	223	190		(R)	GALLSAYPPHSLMNPR	(S)
NA	NA	NA	NA	NA	-0.324	-0.006	-0.224	0.247	0.233	NA	NA	NA	NA	NA	NA	NA	NA	NA	NA	NA	NA	NA	NA	NA	NA	NA	NA	NA	NA	NP_057951-A-5-7_220_217_226	NP_057951-A-5-7-chr20-32664621-32666310-218-stop229-whim12	1	1	RALY	7.7	7.7	6	45	220	A	frameshift-truncation	+	220	228	217		(K)	ANPGTQPGHR	(R)
NA	NA	NA	NA	NA	NA	NA	NA	NA	NA	NA	NA	NA	NA	NA	NA	NA	NA	NA	NA	1.34	0.973	0.71	1.248	1.286	NA	NA	NA	NA	NA	NP_004663-AN2-12-chr1_810_947_972	NP_004663-AN2-12-chr1-27685347-27685907-stop988-whim2	1	1	MAP3K6	7.69	0.96	1	1	810	AN2	frameshift-truncation	-	810	987	947		(R)	HPLSTHPAPRSAASVMGAPASSGCPR	(S)
NA	NA	NA	NA	NA	0.055	-0.278	-0.008	-0.471	-0.312	NA	NA	NA	NA	NA	NA	NA	NA	NA	NA	NA	NA	NA	NA	NA	NA	NA	NA	NA	NA	NP_009133-AN2-5-chr17_585_581_589	NP_009133-AN2-5-chr17-19823428-19827720-stop662-whim2	1	1	AKAP10	7.69	7.69	1	1	585	AN2	deletion-short3	-	585	585	581	M585m	(R)	TYAGmTFGR	(V)
NA	NA	NA	NA	NA	NA	NA	NA	NA	NA	NA	NA	NA	NA	NA	NA	NA	NA	NA	NA	-0.487	-2.625	-2.429	-2.325	-0.706	NA	NA	NA	NA	NA	NP_872353-AN2-4-chr7_88_99_111	NP_872353-AN2-4-chr7-44621183-44621321-stop112-whim12	1	1	TMED4	7.68	9.19	4	6	88	AN2	frameshift-truncation	-	88	111	99		(R)	LGGPLHVHLPHAR	(-)
NA	NA	NA	NA	NA	NA	NA	NA	NA	NA	0.368	0.466	0.585	0.472	0.805	NA	NA	NA	NA	NA	NA	NA	NA	NA	NA	NA	NA	NA	NA	NA	NP_001185982-AN1-16-chr16_646_636_647	NP_001185982-AN1-16-chr16-20856167-20856423-stop774-whim2	1	1	LOC81691	7.66	3.05	1	2	646	AN1	frameshift-truncation	+	646	773	636		(K)	SGKQKKYCFLSK	(D)
1.298	1.217	1.138	0.647	1.27	NA	NA	NA	NA	NA	NA	NA	NA	NA	NA	NA	NA	NA	NA	NA	NA	NA	NA	NA	NA	NA	NA	NA	NA	NA	NP_071504-AN2-14-chr11_341_414_427	NP_071504-AN2-14-chr11-66633816-66636316-stop442-whim2	1	1	PC	7.62	7.62	1	1	341	AN2	frameshift-truncation	-	341	441	414		(K)	EPSSRPTTTPCWSK	(S)
NA	NA	NA	NA	NA	NA	NA	NA	NA	NA	NA	NA	NA	NA	NA	-0.486	-0.0895	1.546	-1.01	1.023	NA	NA	NA	NA	NA	NA	NA	NA	NA	NA	NP_940982-AN1-2-chr19_188_215_222	NP_940982-AN1-2-chr19-17597766-17597912-stop333-whim2	1	1	SLC27A1	7.62	8.36	1	1	188	AN1	frameshift-truncation	+	188	332	215		(R)	SERASGEK	(F)
0.22	0.372	0.127	-0.065	0.206	NA	NA	NA	NA	NA	NA	NA	NA	NA	NA	NA	NA	NA	NA	NA	NA	NA	NA	NA	NA	NA	NA	NA	NA	NA	NP_055156-A-4-9_198_197_209	NP_055156-A-4-9-chr6-36938470-36945853-264-whim2	1	1	MTCH1	7.6	7.6		0	198	ISED	inframe-splice-exon-deletion	-			197		(K)	EFSQALAIRSYTK	(F)
NA	NA	NA	NA	NA	NA	NA	NA	NA	NA	NA	NA	NA	NA	NA	NA	NA	NA	NA	NA	0.03	0.312	-0.043	0.329	0.023	NA	NA	NA	NA	NA	NP_001243625-AN1-4-chr11_186_186_193	NP_001243625-AN1-4-chr11-45226329-45230424-stop421-whim12	1	1	PRDM11	7.59	7.59	4	35	186	AN1	frameshift-truncation	+	186	420	186		(R)	NVAHLAER	(K)
NA	NA	NA	NA	NA	0.029	-0.847	-0.045	-1.312	-0.949	NA	NA	NA	NA	NA	NA	NA	NA	NA	NA	NA	NA	NA	NA	NA	NA	NA	NA	NA	NA	NP_954592-AN1-3-chr19_152_272_286	NP_954592-AN1-3-chr19-11018821-11019465-stop331-whim30	1	1	CARM1	7.58	2.96	1	1	152	AN1	frameshift-truncation	+	152	330	272		(R)	ADRHLPARHPAKPHR	(L)
NA	NA	NA	NA	NA	NA	NA	NA	NA	NA	NA	NA	NA	NA	NA	NA	NA	NA	NA	NA	2.309	2.39	2.505	2.106	2.072	NA	NA	NA	NA	NA	NP_065945-AN1-5-chr4_350_360_373	NP_065945-AN1-5-chr4-1348635-1348774-stop409-whim30	1	2	UVSSA	7.57	1.08	1	2	350	AN1	frameshift-truncation	+	350	408	360		(R)	DPPGQWTWHVPPSR	(T)
NA	NA	NA	NA	NA	NA	NA	NA	NA	NA	NA	NA	NA	NA	NA	-1.167	-0.9325	-1.187	-0.804	-1.121	NA	NA	NA	NA	NA	NA	NA	NA	NA	NA	NP_004229-AN2-17-chr2_1248_1236_1248	NP_004229-AN2-17-chr2-230657847-230659894-stop1285-whim12	1	1	TRIP12	7.56	7.56	6	87	1248	AN2	frameshift-truncation	-	1248	1284	1236		(K)	VHDFPSGNGTGGR	(R)
NA	NA	NA	NA	NA	NA	NA	NA	NA	NA	0.268	0.567	0.287	0.274	0.245	NA	NA	NA	NA	NA	NA	NA	NA	NA	NA	NA	NA	NA	NA	NA	NP_001786-AN1-10-chr16_613_648_657	NP_001786-AN1-10-chr16-66434919-66436778-stop679-whim2	1	1	CDH5	7.54	7.54	1	2	613	AN1	frameshift-truncation	+	613	678	648		(R)	PPLRHAAHLR	(L)
NA	NA	NA	NA	NA	NA	NA	NA	NA	NA	NA	NA	NA	NA	NA	NA	NA	NA	NA	NA	-0.759	-0.912	-0.721	-1.198	-1.289	NA	NA	NA	NA	NA	NP_001257376-AN1-12-chr17_418_406_418	NP_001257376-AN1-12-chr17-7126556-7126801-stop428-whim12	1	1	ACADVL	7.53	7.53	2	5	418	AN1	frameshift-truncation	+	418	427	406		(K)	LARMVMLQYVTEK	(T)
NA	NA	NA	NA	NA	NA	NA	NA	NA	NA	0.009	-0.205	-0.089	-0.033	-0.161	NA	NA	NA	NA	NA	NA	NA	NA	NA	NA	NA	NA	NA	NA	NA	NP_003609-A-12-14_530_527_536	NP_003609-A-12-14-chr2-39507497-39513992-42-whim2	1	1	MAP4K3	7.52	7.16		0	530	ISED	inframe-splice-exon-deletion	-			527	M530m	(K)	DVPmGACFSK	(V)
NA	NA	NA	NA	NA	NA	NA	NA	NA	NA	NA	NA	NA	NA	NA	NA	NA	NA	NA	NA	-0.016	0.114	-0.055	-0.03	-0.077	NA	NA	NA	NA	NA	NP_056170-AN1-8-chr17_307_307_324	NP_056170-AN1-8-chr17-30303633-30315340-stop367-whim2	1	1	SUZ12	7.52	7.52	1	2	307	AN1	frameshift-truncation	+	307	366	307		(R)	LPPFETFSQGPTLQFTLR	(W)
NA	NA	NA	NA	NA	NA	NA	NA	NA	NA	-0.08	0.044	0.02	-0.102	-0.153	NA	NA	NA	NA	NA	NA	NA	NA	NA	NA	NA	NA	NA	NA	NA	NP_667344-AN1-11-chr9_679_677_687	NP_667344-AN1-11-chr9-33332500-33338504-stop708-whim12	1	1	NFX1	7.52	7.52	6	93	679	AN1	frameshift-truncation	+	679	707	677		(K)	SEADATFMCDK	(R)
NA	NA	NA	NA	NA	NA	NA	NA	NA	NA	NA	NA	NA	NA	NA	0.795	0.8945	1	0.845	0.618	NA	NA	NA	NA	NA	NA	NA	NA	NA	NA	NP_001186621-AN1-15-chr7_846_879_898	NP_001186621-AN1-15-chr7-150769223-150770418-stop904-whim30	1	1	SLC4A2	7.51	7.51	1	2	846	AN1	frameshift-truncation	+	846	903	879	C879c	(R)	cPPRPASFYIFSRDREGWFR	(T)
1.018	0.538	0.697	0.57	0.39	NA	NA	NA	NA	NA	NA	NA	NA	NA	NA	NA	NA	NA	NA	NA	NA	NA	NA	NA	NA	NA	NA	NA	NA	NA	NP_000299-A-7-9_249_271_289	NP_000299-A-7-9-chr20-44521950-44523288-85-stop356-whim2	1	1	CTSA	7.5	4.84	1	1	249	A	frameshift-truncation	+	249	355	271	M281m	(R)	VLEGCPAILGmRRTLLWSR	(I)
0.044	-0.678	0.044	0.487	-0.386	NA	NA	NA	NA	NA	NA	NA	NA	NA	NA	NA	NA	NA	NA	NA	NA	NA	NA	NA	NA	NA	NA	NA	NA	NA	NP_057085-AN1-10-chr17_444_449_471	NP_057085-AN1-10-chr17-49362729-49363843-stop535-whim12	1	1	UTP18	7.5	7.5	5	10	444	AN1	frameshift-truncation	+	444	534	449		(K)	LLVYISLPPFANWSLGGKASRTR	(L)
0.509	0.574	0.289	-0.012	0.809	NA	NA	NA	NA	NA	NA	NA	NA	NA	NA	NA	NA	NA	NA	NA	NA	NA	NA	NA	NA	NA	NA	NA	NA	NA	NP_066955-A-10-12_138_153_162	NP_066955-A-10-12-chr10-75231371-75238256-112-stop163-whim30	1	1	PPP3CB	7.5	7.5	2	2	138	A	frameshift-truncation	-	138	162	153		(K)	LLIVCLLLHF	(-)
NA	NA	NA	NA	NA	NA	NA	NA	NA	NA	NA	NA	NA	NA	NA	NA	NA	NA	NA	NA	1.272	2.381	2.397	2.796	1.572	NA	NA	NA	NA	NA	NP_004747-A-3-5_181_241_251	NP_004747-A-3-5-chr19-41179554-41186821-190-stop260-whim30	1	1	NUMBL	7.48	4.65	1	3	181	A	frameshift-truncation	-	181	259	241		(R)	APSVGSQHSAR	(R)
0.443	0.159	0.201	0.042	0.361	NA	NA	NA	NA	NA	NA	NA	NA	NA	NA	NA	NA	NA	NA	NA	NA	NA	NA	NA	NA	NA	NA	NA	NA	NA	NP_001136068-AN2-5-chr10_417_438_455	NP_001136068-AN2-5-chr10-74776654-74790028-stop470-whim30	1	1	P4HA1	7.47	0.57	1	1	417	AN2	frameshift-truncation	-	417	469	438	M439m	(K)	EmEKFTEAYALHCLSQNK	(T)
NA	NA	NA	NA	NA	NA	NA	NA	NA	NA	NA	NA	NA	NA	NA	NA	NA	NA	NA	NA	1.632	2.078	1.753	1.816	1.366	NA	NA	NA	NA	NA	NP_079170-AN2-9-chr2_343_336_349	NP_079170-AN2-9-chr2-10774685-10784445-stop370-whim2	1	1	NOL10	7.47	0.25	2	12	343	AN2	frameshift-truncation	-	343	369	336		(K)	MGIYYIPAFPLSYR	(G)
NA	NA	NA	NA	NA	NA	NA	NA	NA	NA	NA	NA	NA	NA	NA	NA	NA	NA	NA	NA	0.153	0.141	0.167	0.218	0.054	NA	NA	NA	NA	NA	NP_067047-AN1-3-chr9_2005_2005_2015	NP_067047-AN1-3-chr9-109692970-109693125-stop2051-whim2	1	1	ZNF462	7.47	7.47	3	7	2005	AN1	frameshift-truncation	+	2005	2050	2005		(K)	VGPSSSFCSGK	(G)
1.185	0.769	0.786	0.549	1.339	NA	NA	NA	NA	NA	NA	NA	NA	NA	NA	NA	NA	NA	NA	NA	NA	NA	NA	NA	NA	NA	NA	NA	NA	NA	NP_613075-AN2-8-chr5_58_66_87	NP_613075-AN2-8-chr5-134696295-134724611-stop124-whim2	1	1	H2AFY	7.47	2.94	2	3	58	AN2	frameshift-truncation	-	58	123	66		(R)	QPAPTAQPRAHLPTASQSSPPR	(A)
NA	NA	NA	NA	NA	NA	NA	NA	NA	NA	0.072	0.006	0.364	0.259	-0.2	NA	NA	NA	NA	NA	NA	NA	NA	NA	NA	NA	NA	NA	NA	NA	NP_059345-AN1-9-chr17_357_351_364	NP_059345-AN1-9-chr17-79077908-79078310-stop442-whim12	1	1	BAIAP2	7.46	7.46	4	22	357	AN1	frameshift-truncation	+	357	441	351		(K)	NSYATTAENKTLPR	(S)
0.111	0.084	-0.055	-0.136	0.151	NA	NA	NA	NA	NA	NA	NA	NA	NA	NA	NA	NA	NA	NA	NA	NA	NA	NA	NA	NA	NA	NA	NA	NA	NA	NP_073609-AN1-4-chr11_110_103_118	NP_073609-AN1-4-chr11-720223-720548-stop327-whim12	1	1	EPS8L2	7.46	7.46	6	76	110	AN1	frameshift-truncation	+	110	326	103		(R)	LLDIESQSAQTPGASR	(V)
NA	NA	NA	NA	NA	NA	NA	NA	NA	NA	NA	NA	NA	NA	NA	NA	NA	NA	NA	NA	-0.423	-0.353	0.087	-0.321	-1.037	NA	NA	NA	NA	NA	NP_001007468-A-16-21_603_743_753	NP_001007468-A-16-21-chr22-31998771-32003922-352-stop783-whim2	1	1	SFI1	7.45	7.45	3	2	603	A	frameshift-truncation	+	603	782	743		(R)	GWPLYWKGGER	(R)
NA	NA	NA	NA	NA	NA	NA	NA	NA	NA	NA	NA	NA	NA	NA	0.835	0.8215	0.147	0.67	0.496	NA	NA	NA	NA	NA	NA	NA	NA	NA	NA	NP_001180463-AN2-8-chr4_195_192_202	NP_001180463-AN2-8-chr4-15638294-15640130-stop209-whim12	1	1	FBXL5	7.42	1.1	4	16	195	AN2	frameshift-truncation	-	195	208	192		(K)	SDKGSVRTLHR	(Y)
NA	NA	NA	NA	NA	NA	NA	NA	NA	NA	NA	NA	NA	NA	NA	NA	NA	NA	NA	NA	0.53	-0.151	-1.044	-0.716	0.33	NA	NA	NA	NA	NA	NP_004136-AN1-23-chr19_1414_1417_1428	NP_004136-AN1-23-chr19-17309117-17311069-stop1463-whim12	1	1	MYO9B	7.4	1.81	6	8	1414	AN1	frameshift-truncation	+	1414	1462	1417		(R)	SHVLSPADPRLR	(G)
NA	NA	NA	NA	NA	NA	NA	NA	NA	NA	0.329	0.604	0.531	0.454	0.178	NA	NA	NA	NA	NA	NA	NA	NA	NA	NA	NA	NA	NA	NA	NA	NP_001028895-AN2-8-chr8_75_98_106	NP_001028895-AN2-8-chr8-81700895-81733608-stop110-whim30	1	1	ZNF704	7.38	1.43	2	5	75	AN2	frameshift-truncation	-	75	109	98		(R)	HKMKFREQK	(V)
NA	NA	NA	NA	NA	NA	NA	NA	NA	NA	NA	NA	NA	NA	NA	NA	NA	NA	NA	NA	0.636	1.077	1.224	1.555	0.712	NA	NA	NA	NA	NA	NP_006303-A-26-28_937_987_998	NP_006303-A-26-28-chr12-124846843-124856567-121-stop1022-whim2	1	1	NCOR2	7.38	6.56	4	5	937	A	frameshift-truncation	-	937	1021	987		(R)	HPPPTRRPSQPR	(P)
NA	NA	NA	NA	NA	NA	NA	NA	NA	NA	NA	NA	NA	NA	NA	NA	NA	NA	NA	NA	-0.627	-0.682	-0.481	-1.344	-1.303	NA	NA	NA	NA	NA	NP_001120977-AN2-13-chr8_59_50_59	NP_001120977-AN2-13-chr8-17928894-17933049-stop69-whim2	1	1	ASAH1	7.32	4.04	1	1	59	AN2	frameshift-truncation	-	59	68	50		(K)	STYPPSGPTR	(C)
NA	NA	NA	NA	NA	NA	NA	NA	NA	NA	NA	NA	NA	NA	NA	NA	NA	NA	NA	NA	-0.345	-0.052	-0.243	0.167	-0.256	NA	NA	NA	NA	NA	NP_005487-AN1-4-chr3_230_225_233	NP_005487-AN1-4-chr3-160122292-160124201-stop238-whim12	1	1	SMC4	7.3	3.43	4	3	230	AN1	frameshift-truncation	+	230	237	225		(R)	FLILQSLMK	(I)
0.069	-0.152	-0.114	-0.2	0.141	NA	NA	NA	NA	NA	NA	NA	NA	NA	NA	NA	NA	NA	NA	NA	NA	NA	NA	NA	NA	NA	NA	NA	NA	NA	NP_598001-AN1-5-chr1_161_165_172	NP_598001-AN1-5-chr1-198247199-198247811-stop173-whim2	1	1	NEK7	7.3	1.08	1	1	161	AN1	frameshift-truncation	+	161	172	165	M169m	(K)	MENKmHLK	(-)
NA	NA	NA	NA	NA	NA	NA	NA	NA	NA	NA	NA	NA	NA	NA	NA	NA	NA	NA	NA	0.301	1.227	1.227	1.511	0.419	NA	NA	NA	NA	NA	NP_001240810-AN2-6-chr9_117_117_125	NP_001240810-AN2-6-chr9-134935761-134952828-stop135-whim6	1	1	MED27	7.29	7.29	1	3	117	AN2	frameshift-truncation	-	117	134	117		(K)	GVHGAGSQR	(G)
NA	NA	NA	NA	NA	NA	NA	NA	NA	NA	NA	NA	NA	NA	NA	1.513	1.9195	1.928	1.573	1.494	NA	NA	NA	NA	NA	NA	NA	NA	NA	NA	NP_061895-AN2-15-chr18_35_12_36	NP_061895-AN2-15-chr18-66379733-66381082-stop136-whim12	1	1	TMX3	7.28	5.39	2	3	35	AN2	frameshift-truncation	-	35	135	12	M21m	(R)	LCATVVVLDmVVCKGFVEDLDESSK	(Q)
0.947	1.033	0.952	0.282	1.167	NA	NA	NA	NA	NA	NA	NA	NA	NA	NA	NA	NA	NA	NA	NA	NA	NA	NA	NA	NA	NA	NA	NA	NA	NA	NP_004738-AN2-17-chr10_1177_1209_1217	NP_004738-AN2-17-chr10-79579446-79579652-stop1340-whim12	1	1	DLG5	7.27	6.62	6	66	1177	AN2	frameshift-truncation	-	1177	1339	1209		(K)	LISQVLFPK	(D)
NA	NA	NA	NA	NA	NA	NA	NA	NA	NA	NA	NA	NA	NA	NA	NA	NA	NA	NA	NA	NA	NA	NA	NA	NA	-0.381	0.371	0.472	0.036	1.553	NP_872346-A-13-15_592_606_623	NP_872346-A-13-15-chrX-134709151-134713712-235-stop624-whim2	1	1	DDX26B	7.27	7.27	2	2	592	A	frameshift-truncation	+	592	623	606	M612m	(K)	MVRSHLmASCQNLLHQSL	(-)
NA	NA	NA	NA	NA	NA	NA	NA	NA	NA	NA	NA	NA	NA	NA	-0.446	-0.3075	-0.37	-0.219	-0.272	NA	NA	NA	NA	NA	NA	NA	NA	NA	NA	NP_001184033-AN1-33-chr11_3811_3808_3826	NP_001184033-AN1-33-chr11-118390779-118391519-stop3848-whim2	1	1	KMT2A	7.24	1.48	1	1	3811	AN1	frameshift-truncation	+	3811	3847	3808	M3818m M3820m	(K)	SARATSMDLPmPmRFRHLK	(K)
-0.249	-0.074	0.051	-0.306	-0.139	NA	NA	NA	NA	NA	NA	NA	NA	NA	NA	NA	NA	NA	NA	NA	NA	NA	NA	NA	NA	NA	NA	NA	NA	NA	NP_631918-A-12-14_83_197_210	NP_631918-A-12-14-chr7-6474651-6485583-172-stop218-whim2	1	1	DAGLB	7.22	3.86	2	3	83	A	frameshift-truncation	-	83	217	197	M204m	(K)	SLPRWSAmPQGAPR	(K)
NA	NA	NA	NA	NA	-1.9	-1.858	-1.383	-1.6	-1.853	NA	NA	NA	NA	NA	NA	NA	NA	NA	NA	NA	NA	NA	NA	NA	NA	NA	NA	NA	NA	NP_004564-AN2-26-chr15_195_207_222	NP_004564-AN2-26-chr15-40593375-40594157-stop273-whim30	1	1	PLCB2	7.2	7.2	1	1	195	AN2	frameshift-truncation	-	195	272	207	M220m	(R)	VGDSLMQSVTGIQmWR	(W)
NA	NA	NA	NA	NA	NA	NA	NA	NA	NA	0.102	0.166	0.397	-0.227	-0.09	NA	NA	NA	NA	NA	NA	NA	NA	NA	NA	NA	NA	NA	NA	NA	NP_001129071-AN1-5-chr1_280_271_290	NP_001129071-AN1-5-chr1-218607790-218609426-stop405-whim2	1	1	TGFB2	7.19	7.19	1	4	280	AN1	deletion	+	280	301	271		(K)	SEELEARFADLSHNRPTGGR	(S)
NA	NA	NA	NA	NA	NA	NA	NA	NA	NA	-0.139	-0.003	0.236	-0.198	0.029	NA	NA	NA	NA	NA	NA	NA	NA	NA	NA	NA	NA	NA	NA	NA	NP_001123885-AN1-10-chr1_468_462_491	NP_001123885-AN1-10-chr1-1222976-1223122-stop780-whim2	1	1	SCNN1D	7.18	7.18	2	2	468	AN1	deletion	+	468	498	462		(R)	PGITHGSWFTAVTTRPSWGTTASASGQGRR	(P)
NA	NA	NA	NA	NA	NA	NA	NA	NA	NA	NA	NA	NA	NA	NA	NA	NA	NA	NA	NA	NA	NA	NA	NA	NA	0.187	0.841	0.652	0.586	1.152	NP_055470-AN1-2-chr1_252_248_255	NP_055470-AN1-2-chr1-156177804-156177956-stop293-whim30	1	2	SLC25A44	7.17	4.77	1	1	252	AN1	frameshift-truncation	+	252	291	248		(R)	TRVQHLQK	(P)
0.327	0.164	0.19	-0.105	0.215	NA	NA	NA	NA	NA	NA	NA	NA	NA	NA	NA	NA	NA	NA	NA	NA	NA	NA	NA	NA	NA	NA	NA	NA	NA	NP_955387-AN2-21-chr16_166_202_212	NP_955387-AN2-21-chr16-77401567-77465191-stop256-whim6	1	1	ADAMTS18	7.15	4.8	1	2	166	AN2	frameshift-truncation	-	166	255	202		(R)	LWPELSWLLPK	(S)
0.153	0.049	0.027	-0.028	0.163	NA	NA	NA	NA	NA	NA	NA	NA	NA	NA	NA	NA	NA	NA	NA	NA	NA	NA	NA	NA	NA	NA	NA	NA	NA	NP_037514-AN2-13-chr14_373_377_394	NP_037514-AN2-13-chr14-77759634-77762506-stop395-whim30	1	1	POMT2	7.12	2.89	2	2	373	AN2	frameshift-truncation	-	373	394	377		(R)	LLSYHTSTQSTHTSIIEP	(-)
NA	NA	NA	NA	NA	NA	NA	NA	NA	NA	NA	NA	NA	NA	NA	NA	NA	NA	NA	NA	0.689	1.005	0.645	0.814	0.646	NA	NA	NA	NA	NA	NP_001157903-AN1-3-chr20_186_177_192	NP_001157903-AN1-3-chr20-37255858-37258147-stop649-whim30	1	1	ARHGAP40	7.11	7.11	1	1	186	AN1	deletion	+	186	234	177		(R)	DVFGVFNSGQSLGGCR	(S)
NA	NA	NA	NA	NA	NA	NA	NA	NA	NA	NA	NA	NA	NA	NA	0.095	0.0365	-0.39	0.115	-0.199	NA	NA	NA	NA	NA	NA	NA	NA	NA	NA	NP_002159-AN2-7-chr15_227_206_235	NP_002159-AN2-7-chr15-90630785-90631590-stop241-whim2	1	1	IDH2	7.1	7.1	4	5	227	AN2	frameshift-truncation	-	227	240	206		(K)	EWEVYNFPAGGVGMGMYNTDEAASSMPSRR	(N)
NA	NA	NA	NA	NA	NA	NA	NA	NA	NA	NA	NA	NA	NA	NA	0.446	0.1085	-0.239	0.521	0.128	NA	NA	NA	NA	NA	NA	NA	NA	NA	NA	NP_006608-AN2-3-chr1_306_293_318	NP_006608-AN2-3-chr1-156643723-156645007-stop326-whim2	1	1	NES	7.1	0.89	1	1	306	AN2	frameshift-truncation	-	306	325	293	M293m M307m M312m M317m	(K)	mSLSLEVATYRTLQmVAWTmAAISmR	(I)
NA	NA	NA	NA	NA	0.771	0.709	0.865	0.963	0.947	NA	NA	NA	NA	NA	NA	NA	NA	NA	NA	NA	NA	NA	NA	NA	NA	NA	NA	NA	NA	NP_005712-AN1-7-chr2_229_238_251	NP_005712-AN1-7-chr2-114697679-114698416-stop264-whim2	1	1	ACTR3	7.09	4.48	1	1	229	AN1	frameshift-truncation	+	229	262	238		(K)	LERSGTLVAHCSLK	(L)
NA	NA	NA	NA	NA	NA	NA	NA	NA	NA	NA	NA	NA	NA	NA	NA	NA	NA	NA	NA	0.026	-0.179	0.158	-0.021	-0.282	NA	NA	NA	NA	NA	NP_001269-AN2-5-chr10_609_603_611	NP_001269-AN2-5-chr10-101953786-101954181-stop712-whim2	1	1	CHUK	7.09	3.83	1	2	609	AN2	deletion	-	609	609	603		(K)	ELFGHLRGK	(R)
NA	NA	NA	NA	NA	NA	NA	NA	NA	NA	NA	NA	NA	NA	NA	-0.996	-1.1465	-0.765	-0.909	-0.796	NA	NA	NA	NA	NA	NA	NA	NA	NA	NA	NP_001127703-AN2-12-chr3_165_182_195	NP_001127703-AN2-12-chr3-52562800-52562876-stop198-whim12	1	1	NT5DC2	7.08	6.46	5	7	165	AN2	frameshift-truncation	-	165	197	182		(K)	LPPHHPSCLPGAPR	(A)
NA	NA	NA	NA	NA	NA	NA	NA	NA	NA	NA	NA	NA	NA	NA	NA	NA	NA	NA	NA	-1.169	-1.114	-0.94	-1.007	-0.976	NA	NA	NA	NA	NA	NP_001015880-AN1-2-chr10_49_38_51	NP_001015880-AN1-2-chr10-89469070-89472973-stop573-whim12	1	1	PAPSS2	7.04	7.04	1	1	49	AN1	deletion	+	49	80	38		(R)	GGFRGCTVWLTERK	(I)
NA	NA	NA	NA	NA	NA	NA	NA	NA	NA	NA	NA	NA	NA	NA	NA	NA	NA	NA	NA	0.071	-0.882	-0.808	-1.213	0.114	NA	NA	NA	NA	NA	NP_073738-AN1-8-chr17_332_343_355	NP_073738-AN1-8-chr17-48627476-48627590-stop796-whim30	1	1	SPATA20	7.01	0.25	1	9	332	AN1	deletion	+	332	359	343	M345m	(R)	CSmTRHSSLWPIR	(R)
0.482	0.997	0.932	0.921	0.655	NA	NA	NA	NA	NA	NA	NA	NA	NA	NA	NA	NA	NA	NA	NA	NA	NA	NA	NA	NA	NA	NA	NA	NA	NA	NP_001152759-AN1-5-chr12_219_213_223	NP_001152759-AN1-5-chr12-6978937-6979218-stop261-whim12	1	1	TPI1	7	7	5	13	219	AN1	frameshift-truncation	+	219	260	213		(K)	TATPQQEVHEK	(L)
-2.641	-2.682	-3.065	-2.803	-2.613	NA	NA	NA	NA	NA	NA	NA	NA	NA	NA	NA	NA	NA	NA	NA	NA	NA	NA	NA	NA	NA	NA	NA	NA	NA	NP_002742-A-9-11_84_118_125	NP_002742-A-9-11-chr22-50705911-50706248-59-stop143-whim12	1	1	MAPK11	6.99	6.99	6	10	84	A	frameshift-truncation	-	84	142	118		(R)	AEVHPLGR	(D)
NA	NA	NA	NA	NA	NA	NA	NA	NA	NA	NA	NA	NA	NA	NA	NA	NA	NA	NA	NA	NA	NA	NA	NA	NA	NA	NA	NA	NA	NA	NP_057173-AN1-2-chr3_33_29_37	NP_057173-AN1-2-chr3-48289167-48309407-stop121-whim2	1	1	ZNF589	6.98	-1.31	1	1	33	AN1	frameshift-truncation	+	33	120	29		(K)	PRYLNQSQK	(S)
0.261	-0.149	-0.007	-0.312	0.019	NA	NA	NA	NA	NA	NA	NA	NA	NA	NA	NA	NA	NA	NA	NA	NA	NA	NA	NA	NA	NA	NA	NA	NA	NA	NP_057297-AN1-6-chr15_276_269_277	NP_057297-AN1-6-chr15-64698658-64701978-stop291-whim30	1	1	TRIP4	6.96	1.15	1	1	276	AN1	frameshift-truncation	+	276	290	269		(K)	LLEFDRTRK	(E)
NA	NA	NA	NA	NA	NA	NA	NA	NA	NA	NA	NA	NA	NA	NA	0.097	0.2635	0.159	0.009	0.301	NA	NA	NA	NA	NA	NA	NA	NA	NA	NA	NP_065970-AN2-10-chr2_1335_1317_1335	NP_065970-AN2-10-chr2-202579902-202580394-stop1399-whim2	1	1	ALS2	6.94	4.1	3	7	1335	AN2	frameshift-truncation	-	1335	1398	1317		(K)	AWDNIAVALTTSRRQHRDR	(P)
NA	NA	NA	NA	NA	NA	NA	NA	NA	NA	0.186	0.064	-0.138	-0.058	-0.497	NA	NA	NA	NA	NA	NA	NA	NA	NA	NA	NA	NA	NA	NA	NA	NP_001025189-AN2-4-chr16_64_52_68	NP_001025189-AN2-4-chr16-88877770-88877957-stop78-whim6	1	1	APRT	6.89	6.89	1	2	64	AN2	frameshift-truncation	-	64	77	52		(K)	ATHGGRIDYIAGRPSRR	(F)
-0.416	-0.403	-0.211	-0.241	-0.571	NA	NA	NA	NA	NA	NA	NA	NA	NA	NA	NA	NA	NA	NA	NA	NA	NA	NA	NA	NA	NA	NA	NA	NA	NA	NP_061854-AN1-19-chr2_716_717_728	NP_061854-AN1-19-chr2-183624034-183627378-stop787-whim2	1	1	DNAJC10	6.82	2.16	1	1	716	AN1	frameshift-truncation	+	716	786	717		(K)	MANCIFLFQMIK	(G)
0.202	0.462	0.432	0.848	0.216	NA	NA	NA	NA	NA	NA	NA	NA	NA	NA	NA	NA	NA	NA	NA	NA	NA	NA	NA	NA	NA	NA	NA	NA	NA	NP_114032-AN2-3-chr1_785_847_857	NP_114032-AN2-3-chr1-245018389-245018725-stop866-whim12	1	1	HNRNPU	6.82	6.82	1	2	785	AN2	frameshift-extension	-	785	865	847		(R)	TDTYFSKTFTR	(S)
NA	NA	NA	NA	NA	NA	NA	NA	NA	NA	NA	NA	NA	NA	NA	NA	NA	NA	NA	NA	0.2	1.063	0.403	0.78	0.61	NA	NA	NA	NA	NA	NP_079390-A-7-9_2120_2114_2124	NP_079390-A-7-9-chr12-88453797-88456468-165-whim30	1	1	CEP290	6.78	3.25		0	2120	ISED	inframe-splice-exon-deletion	-			2114		(K)	LGHVRGAELEK	(L)
NA	NA	NA	NA	NA	NA	NA	NA	NA	NA	NA	NA	NA	NA	NA	NA	NA	NA	NA	NA	NA	NA	NA	NA	NA	0.248	0.302	0.525	0.26	0.5	NP_006280-A-25-27_1372_1369_1385	NP_006280-A-25-27-chr9-35710680-35710985-90-variant-whim12	1	1	TLN1	6.77	3.75		0	1372	ISED	inframe-splice-exon-deletion	-			1369	M1377m	(R)	ELEVLGEAmTGISQNAK	(N)
NA	NA	NA	NA	NA	NA	NA	NA	NA	NA	NA	NA	NA	NA	NA	-0.275	0.0815	-0.917	-0.033	-0.696	NA	NA	NA	NA	NA	NA	NA	NA	NA	NA	NP_001091089-AN2-5-chr7_185_253_271	NP_001091089-AN2-5-chr7-1589522-1589758-stop403-whim2	1	1	TMEM184A	6.71	6.71	1	4	185	AN2	frameshift-truncation	-	185	401	253		(R)	AAAGHPGAVRGHPGGGDQR	(R)
NA	NA	NA	NA	NA	NA	NA	NA	NA	NA	NA	NA	NA	NA	NA	-0.042	-0.1225	-0.111	-0.045	0.005	NA	NA	NA	NA	NA	NA	NA	NA	NA	NA	NP_006408-AN1-5-chr1_338_377_398	NP_006408-AN1-5-chr1-79125168-79128392-stop413-whim30	1	1	IFI44	6.71	4.95	1	3	338	AN1	frameshift-truncation	+	338	412	377	M378m	(R)	RmLWAADDFLEDLPFEQIGESK	(G)
NA	NA	NA	NA	NA	NA	NA	NA	NA	NA	0.002	-0.136	0.046	0.041	0.052	NA	NA	NA	NA	NA	NA	NA	NA	NA	NA	NA	NA	NA	NA	NA	NP_612402-AN1-3-chr19_117_142_162	NP_612402-AN1-3-chr19-1495606-1496315-stop179-whim30	1	1	REEP6	6.66	7.96	3	2	117	AN1	frameshift-truncation	+	117	178	142	Q142q	(R)	qNHERPQRASPGRGGRNNQER	(S)
NA	NA	NA	NA	NA	NA	NA	NA	NA	NA	NA	NA	NA	NA	NA	0.586	0.5715	0.269	0.682	0.272	NA	NA	NA	NA	NA	NA	NA	NA	NA	NA	NP_060418-A-9-14_95_89_99	NP_060418-A-9-14-chr9-95072957-95083949-2191-stop156-whim2	1	1	NOL8	6.62	6.32	2	1	95	A	frameshift-truncation	-	95	155	89		(K)	ESFLHRSLWVK	(H)
NA	NA	NA	NA	NA	NA	NA	NA	NA	NA	NA	NA	NA	NA	NA	NA	NA	NA	NA	NA	NA	NA	NA	NA	NA	-0.204	0.18	0.044	0.048	-0.636	NP_065713-AN1-5-chr6_197_226_235	NP_065713-AN1-5-chr6-24412623-24415275-stop244-whim2	1	1	MRS2	6.61	6.61	1	3	197	AN1	frameshift-truncation	+	197	243	226		(K)	LHILLQNGKR	(S)
NA	NA	NA	NA	NA	NA	NA	NA	NA	NA	NA	NA	NA	NA	NA	NA	NA	NA	NA	NA	NA	NA	NA	NA	NA	0.213	0.434	0.235	0.199	0.187	NP_000126-AN2-24-chr16_610_610_629	NP_000126-AN2-24-chr16-89842219-89845208-stop638-whim2	1	1	FANCA	6.55	2.6	2	1	610	AN2	frameshift-truncation	-	610	637	610		(R)	IKSPHLCTPPTARPALLLKR	(S)
NA	NA	NA	NA	NA	NA	NA	NA	NA	NA	0.572	0.571	0.184	0.578	0.676	NA	NA	NA	NA	NA	NA	NA	NA	NA	NA	NA	NA	NA	NA	NA	NP_006363-A-5-8_126_124_132	NP_006363-A-5-8-chr6-86333830-86349938-291-variant-whim4	1	1	SYNCRIP	6.51	6.51		0	126	ISED	inframe-splice-exon-deletion	-			124		(K)	IKYNNHEIR	(S)
[truncated: 3 more columns]

## Sheet: Baseline_two-sample-t-test
id	adj.P.Val.Resistant.vs.Sensitive	AveExpr.Resistant.vs.Sensitive	Log.P.Value.Resistant.vs.Sensitive	logFC.Resistant.vs.Sensitive	P.Value.Resistant.vs.Sensitive	t.Resistant.vs.Sensitive	W2_D1.V.2h	W2_D3.V.50h	W12_D1.V.2h	W12_D3.V.50h	W4_D1.V.2h	W4_D3.V.50h	W30_D1.V.2h	W30_D3.V.50h	id.1.x	id.query	id.mapped	id.concat	id.1.y	accession_number
RAB11FIP5	0.900202	0.09925	1.05363	-0.043	0.78458	-0.280419	-0.087	0.023	0.282	0.265	0.173	0.289	-0.065	-0.086	RAB11FIP5	RAB11FIP5	RAB11FIP5	RAB11FIP5	NP_056285-AN2-3-chr2_523_585_611	NP_056285-AN2-3-chr2-73308548-73315177-stop1114-whim2
LIME1	0.421974	-4.5225	5.99227	-0.7855	0.251636	-1.2129	-4.929	-5.151	-3.497	-2.942	-6.504	-5.437	-3.727	-3.993	LIME1	LIME1	LIME1	LIME1	NP_060276-AN1-1-chr20_34_73_104	NP_060276-AN1-1-chr20-62369000-62369197-stop181-whim6
SF1	0.878627	-0.084375	1.29834	-0.05575	0.741593	-0.338548	0.025	-0.083	-0.07	-0.098	0.085	0.199	-0.399	-0.334	SF1	SF1	SF1	SF1	NP_004621-AN2-4-chr11_448_548_560	NP_004621-AN2-4-chr11-64534748-64535042-stop619-whim30
MATR3	0.68518	-0.102125	2.82544	0.09525	0.521742	0.662698	-0.065	-0.016	-0.268	-0.25	-0.084	-0.105	0.191	-0.22	MATR3	MATR3	MATR3	MATR3	NP_061322-AN1-11-chr5_717_719_742	NP_061322-AN1-11-chr5-138658656-138660984-stop846-whim12
ARFGAP3	0.282432	0.707375	9.3712	-0.35725	0.115579	-1.71475	0.833	0.626	1.051	1.034	0.223	0.133	0.926	0.833	ARFGAP3	ARFGAP3	ARFGAP3	ARFGAP3	NP_055385-A-4-6_355_341_355	NP_055385-A-4-6-chr22-43204896-43213147-132-variant-whim21
FUBP1	0.346672	-0.126375	7.57145	0.21075	0.174926	1.45445	-0.244	-0.383	-0.188	-0.112	-0.129	0.228	0.019	-0.202	FUBP1	FUBP1	FUBP1	FUBP1	NP_003893-AN2-17-chr1_97_78_97	NP_003893-AN2-17-chr1-78432783-78433310-stop120-whim12
PALLD	0.0416597	-0.01225	23.0377	0.86	0.00496859	3.53628	0.064	-0.154	-0.807	-0.872	0.365	0.851	0.354	0.101	PALLD	PALLD	PALLD	PALLD	NP_057165-AN1-9-chr4_656_684_718	NP_057165-AN1-9-chr4-169633074-169798873-stop880-whim12
ANXA6	0.521875	-0.1095	4.50628	-0.773	0.354301	-0.968875	-0.332	-0.624	1.072	0.992	0.974	1.307	-1.995	-2.27	ANXA6	ANXA6	ANXA6	ANXA6	NP_001146-A-5-7_525_510_534	NP_001146-A-5-7-chr5-150489407-150496687-18-whim12
PCBP2	0.409449	0.06775	6.32835	-0.156	0.232897	-1.2656	0.191	0.167	0.144	0.081	-0.016	0.031	0.061	-0.117	PCBP2	PCBP2	PCBP2	PCBP2	NP_005007-A-7-10_198_177_200	NP_005007-A-7-10-chr12-53856351-53861004-135-whim12
EWSR1	0.268349	-0.145875	10.0667	0.31575	0.0984768	1.81225	0.034	-0.287	-0.606	-0.356	0.168	0.201	-0.069	-0.252	EWSR1	EWSR1	EWSR1	EWSR1	NP_053733-AN1-15-chr22_533_524_545	NP_053733-AN1-15-chr22-29694885-29695184-stop580-whim12
HNRNPK	0.291816	-0.18175	8.68314	0.228	0.135421	1.61674	-0.095	-0.364	-0.415	-0.309	0.027	0.079	-0.139	-0.238	HNRNPK	HNRNPK	HNRNPK	HNRNPK	NP_112552-A-9-11_111_104_115	NP_112552-A-9-11-chr9-86588314-86589431-72-whim12
VASP	0.0206377	-0.10625	28.1968	0.8545	0.00151469	4.2439	-0.933	-0.681	-0.21	-0.31	0.01	0.179	0.593	0.502	VASP	VASP	VASP	VASP	NP_003361-AN1-8-chr19_292_284_297	NP_003361-AN1-8-chr19-46026953-46027101-stop339-whim12
C11orf54	0.486364	-0.223875	5.17956	0.43075	0.30342	1.08188	0.408	0.433	-1.284	-1.314	0.088	0.101	0.044	-0.267	C11orf54	C11orf54	C11orf54	C11orf54	NP_054758-AN1-5-chr11_170_195_211	NP_054758-AN1-5-chr11-93488552-93490481-stop229-whim12
TMPO	0.409449	-1.16138	6.36615	0.68325	0.23088	1.27148	-0.442	-0.53	-2.635	-2.405	-1.425	-1.432	0.059	-0.481	TMPO	TMPO	TMPO	TMPO	NP_001027454-A-4-7_222_217_225	NP_001027454-A-4-7-chr12-98931350-98938728-216-whim12
RPLP2	0.600601	0.1675	3.74001	-0.1145	0.422667	-0.834186	0.342	0.193	0.029	0.335	0.224	0.143	-0.04	0.114	RPLP2	RPLP2	RPLP2	RPLP2	NP_000995-AN1-3-chr11_91_62_93	NP_000995-AN1-3-chr11-812633-812762-stop115-whim12
SEC31A	0.515935	0.203375	4.64863	0.35525	0.342876	0.993148	0.07	0.494	-0.355	-0.106	-0.522	-0.105	1.033	1.118	SEC31A	SEC31A	SEC31A	SEC31A	NP_001070675-A-13-15_517_511_519	NP_001070675-A-13-15-chr4-83778917-83783686-78-variant-whim2
UGGT1	0.709785	0.210333	2.47575	0.1	0.56549	0.597774	0.085	0.125	0.276	0.222			0.29	0.264	UGGT1	UGGT1	UGGT1	UGGT1	NP_064505-A-20-22_746_745_767	NP_064505-A-20-22-chr2-128913161-128914825-24-whim12
PTBP2	0.107511	-0.5936	15.7461	-1.23075	0.026631	-2.74645	0.391				-1.285	-1.325	-0.216	-0.533	PTBP2	PTBP2	PTBP2	PTBP2	NP_067013-AN1-8-chr1_302_297_331	NP_067013-AN1-8-chr1-97250810-97270340-stop379-whim12
TNC	0.371466	-0.184375	7.0408	-0.46425	0.197661	-1.37491	-0.108	-0.331	0.266	0.364	0.04	0.436	-1.104	-1.038	TNC	TNC	TNC	TNC	NP_002151-A-12-14_1527_1519_1546	NP_002151-A-12-14-chr9-117808961-117819431-273-variant-whim6
GSTP1	0.467154	-0.597375	5.48423	0.71125	0.282864	1.13163	-0.929	-1.556	-1.169	-0.158	0.528	1.508	-1.213	-1.79	GSTP1	GSTP1	GSTP1	GSTP1	NP_000843-AN1-2-chr11_13_13_34	NP_000843-AN1-2-chr11-67351640-67351967-stop84-whim12
MYO6	0.73843	-0.38225	2.24635	0.2	0.596163	0.546395	-0.797	-0.729	-0.239	-0.164	0.511	0.356	-0.725	-1.271	MYO6	MYO6	MYO6	MYO6	NP_004990-A-31-33_1138_1133_1149	NP_004990-A-31-33-chr6-76618344-76623779-27-whim12
FMR1	0.0206377	-0.154625	28.5523	0.72725	0.00139562	4.29405	-0.601	-0.485	-0.45	-0.537	0.265	0.624	0.045	-0.098	FMR1	FMR1	FMR1	FMR1	NP_002015-AN1-16-chrX_580_573_587	NP_002015-AN1-16-chrX-147027136-147030253-stop616-whim12
PRKCSH	0.0537883	-0.24475	20.2799	-0.7465	0.00937594	-3.1697	0.621	0.521	-0.189	-0.439	-0.563	-0.798	-0.479	-0.632	PRKCSH	PRKCSH	PRKCSH	PRKCSH	NP_001001329-AN1-10-chr19_344_344_362	NP_001001329-AN1-10-chr19-11558433-11558507-stop408-whim12
MEMO1	0.356683	0.20175	7.30554	-0.24	0.185971	-1.41478	0.219	0.34	0.268	0.46	0.243	0.426	-0.227	-0.115	MEMO1	MEMO1	MEMO1	MEMO1	NP_057039-AN2-4-chr2_195_176_196	NP_057039-AN2-4-chr2-32112157-32117060-stop204-whim2
ACTN4	0.515935	-1.75687	4.71592	0.60825	0.337604	1.00455	-2.403	-2.25	-1.701	-1.89	-0.405	0.141	-2.772	-2.775	ACTN4	ACTN4	ACTN4	ACTN4	NP_004915-AN1-7-chr19_248_240_255	NP_004915-AN1-7-chr19-39200116-39201915-stop316-whim12
NAA15	0.927328	0.140375	0.697203	-0.03275	0.851686	-0.19161	0.341	0.502	-0.063	-0.153	0.076	0.227	0.163	0.03	NAA15	NAA15	NAA15	NAA15	NP_476516-AN1-17-chr4_719_715_723	NP_476516-AN1-17-chr4-140300008-140305988-stop778-whim12
MAP4	0.960529	0.22325	0.296102	-0.017	0.934092	-0.0846921	0.261	-0.051	0.305	0.412	0.097	-0.255	0.628	0.389	MAP4	MAP4	MAP4	MAP4	NP_002366-A-13-15_177_174_183	NP_002366-A-13-15-chr3-47958664-47963254-123-variant-whim30
GPS1	0.927328	0.155	0.658719	0.0315	0.859267	0.181695	-0.081	-0.1	0.513	0.225	-0.052	0.15	0.238	0.347	GPS1	GPS1	GPS1	GPS1	NP_997657-AN1-5-chr17_270_261_270	NP_997657-AN1-5-chr17-80012851-80013040-stop311-whim12
CASK	0.0332286	-1.18475	24.7452	2.038	0.00335335	3.76677	-1.146	-1.02	-3.261	-3.388	-0.62	-0.621	0.366	0.212	CASK	CASK	CASK	CASK	NP_001119526-A-7-9_580_573_583	NP_001119526-A-7-9-chrX-41413168-41419031-36-whim12
PRPF40A	0.421974	-0.050375	6.03097	0.23725	0.249404	1.21901	0.179	-0.092	-0.359	-0.404	0.117	0.485	-0.146	-0.183	PRPF40A	PRPF40A	PRPF40A	PRPF40A	NP_060362-A-18-20_193_187_196	NP_060362-A-18-20-chr2-153533989-153535865-54-whim12
HNRNPM	0.97288	-0.075875	0.199833	-0.00925	0.955029	-0.0577475	-0.235	-0.196	0.048	0.098	-0.204	0.142	0.083	-0.343	HNRNPM	HNRNPM	HNRNPM	HNRNPM	NP_005959-A-12-14_374_372_385	NP_005959-A-12-14-chr19-8539128-8550486-54-whim12
SUN1	0.0629543	-0.123	18.9747	-0.775	0.0126627	-2.9979	0.642	0.61	-0.13	-0.064	-0.066	-0.215	-0.758	-1.003	SUN1	SUN1	SUN1	SUN1	NP_001124437-AN1-5-chr7_221_271_278	NP_001124437-AN1-5-chr7-883157-888054-stop288-whim12
MYO6_1	0.282432	-0.425	9.52247	0.8105	0.111623	1.73608	-1.128	-0.611	-0.838	-0.744	0.745	1.218	-0.887	-1.155	MYO6_1	MYO6	MYO6_1	MYO6_1	NP_004990-A-27-30_1037_1036_1044	NP_004990-A-27-30-chr6-76602407-76617321-69-whim12
MACF1	0.291816	0.214	8.81829	-0.6105	0.131272	-1.66888	-0.034	-0.22	0.951	0.973	-0.079	-0.307			MACF1	MACF1	MACF1	MACF1	NP_036222-AN1-35-chr1_1544_2578_2597	NP_036222-AN1-35-chr1-39793025-39796874-stop3371-whim12
MPRIP	0.291816	-0.0675	8.64747	0.38625	0.136538	1.64322	-0.381	-0.486	-0.033	0.115	-0.025	0.405			MPRIP	MPRIP	MPRIP	MPRIP	NP_055949-AN1-15-chr17_722_1672_1692	NP_055949-AN1-15-chr17-17064670-17067422-stop2004-whim12
EPB41	0.0537883	-0.207667	20.4281	0.659	0.00906128	3.35765	-0.726	-0.568			-0.29	0.066	0.191	0.081	EPB41	EPB41	EPB41	EPB41	NP_001159477-AN1-15-chr1_729_744_757	NP_001159477-AN1-15-chr1-29391670-29422666-stop888-whim2
DCBLD1		0.0135					-0.025	-0.044	-0.052	0.175					DCBLD1	DCBLD1	DCBLD1	DCBLD1	NP_775945-AN1-14-chr6_539_530_553	NP_775945-AN1-14-chr6-117866760-117869069-stop716-whim12
LMO7	0.955503	-0.01	0.360054	-0.031	0.920438	-0.102299	0.63	0.348	-0.524	-0.432	0.136	-0.716	0.338	0.14	LMO7	LMO7	LMO7	LMO7	NP_056667-AN1-10-chr13_843_858_867	NP_056667-AN1-10-chr13-76408523-76409287-stop908-whim12
CAST	0.335756	-0.114667	7.79009	-0.49525	0.166338	-1.51301	0.234	0.197			0.399	-0.111	-0.508	-0.899	CAST	CAST	CAST	CAST	NP_001035905-AN1-23-chr5_604_577_606	NP_001035905-AN1-23-chr5-96098076-96100927-stop641-whim12
VASP_1	0.883395	0.3375	1.18144	-0.063	0.761827	-0.31294			0.413	0.346	0.107	0.184	0.636	0.339	VASP_1	VASP	VASP_1	VASP_1	NP_003361-AN1-6-chr19_241_241_251	NP_003361-AN1-6-chr19-46025839-46025978-stop287-whim12
KRT7	0.49505	0.0401667	5.03929	0.193	0.31338	1.07123	-0.087	-0.09			-0.055	0.214	-0.004	0.263	KRT7	KRT7	KRT7	KRT7	NP_005547-AN1-6-chr12_329_327_335	NP_005547-AN1-6-chr12-52636921-52639177-stop429-whim2
SUN1_1	0.760408	-0.10275	2.0699	-0.2675	0.620884	-0.509512	1.502	0.579	-0.531	-1.426	-0.081	-0.912	0.035	0.012	SUN1_1	SUN1	SUN1_1	SUN1_1	NP_001124437-AN1-5-chr7_221_228_241	NP_001124437-AN1-5-chr7-883157-889559-stop291-whim2
HSP90AB1	0.486364	0.21575	5.21302	0.2465	0.301091	1.12258			0.026	0.159			0.414	0.264	HSP90AB1	HSP90AB1	HSP90AB1	HSP90AB1	NP_001258898-AN1-4-chr6_216_205_216	NP_001258898-AN1-4-chr6-44217891-44218056-stop217-whim2
HNRNPA1	0.283369	0.093	9.12976	1.455	0.122187	1.71544	-0.963	-0.791			-1.272	-0.293	1.989	1.888	HNRNPA1	HNRNPA1	HNRNPA1	HNRNPA1	NP_002127-A-6-8_227_226_252	NP_002127-A-6-8-chr12-54676449-54677595-75-whim2
USP9X	0.709785	0.0373333	2.46781	-0.14375	0.566525	-0.59615	-0.016	-0.063	0.169	0.251			0.329	-0.446	USP9X	USP9X	USP9X	USP9X	NP_001034679-AN1-12-chrX_589_575_591	NP_001034679-AN1-12-chrX-41010310-41012185-stop640-whim12
TACC2	0.0504197	-0.053875	21.5874	-0.70325	0.00693848	-3.34277	0.418	0.384	0.085	0.304	0.048	-0.305	-0.365	-1	TACC2	TACC2	TACC2	TACC2	NP_996744-A-13-16_2633_2617_2633	NP_996744-A-13-16-chr10-123987523-123996909-231-variant-whim21
TNC_1	0.636548	-0.025375	3.31513	-0.12775	0.466108	-0.756158	-0.061	-0.176	0.188	0.203	0.068	0.166	-0.41	-0.181	TNC_1	TNC	TNC_1	TNC_1	NP_002151-A-12-19_1072_1069_1091	NP_002151-A-12-19-chr9-117808961-117835881-1638-variant-whim6
PPIP5K2	0.282432	0.203833	9.54611	-0.3415	0.111017	-1.77728			0.39	0.473	-0.175	0.059	0.296	0.18	PPIP5K2	PPIP5K2	PPIP5K2	PPIP5K2	NP_001263206-A-23-25_975_970_984	NP_001263206-A-23-25-chr5-102515889-102520372-174-variant-whim6
ANKS1A	0.908125	-0.4755	0.925091	0.05325	0.808148	0.25046	-0.191	-0.357	-0.726	-0.699	-0.521	-0.359			ANKS1A	ANKS1A	ANKS1A	ANKS1A	NP_056060-AN1-3-chr6_147_142_151	NP_056060-AN1-3-chr6-34937943-34940357-stop203-whim12
ATXN2L	0.255287	-0.100833	10.622	0.376	0.086657	1.93533			-0.432	-0.271	-0.15	0.299	0.048	-0.099	ATXN2L	ATXN2L	ATXN2L	ATXN2L	NP_680781-AN1-10-chr16_441_421_449	NP_680781-AN1-10-chr16-28842393-28843507-stop542-whim12
PSMA5	0.168827	-0.072	13.1423	0.648	0.0485029	2.23019	-0.538	-0.525	-0.411	-0.11	0.422	1.125	-0.144	-0.395	PSMA5	PSMA5	PSMA5	PSMA5	NP_002781-AN2-2-chr1_217_210_230	NP_002781-AN2-2-chr1-109944709-109952549-stop241-whim12
TOP1MT	0.0197914	0.117667	31.3889	0.955	0.000726291	5.13256	-0.532	-0.506			0.241	0.664	0.483	0.356	TOP1MT	TOP1MT	TOP1MT	TOP1MT	NP_443195-AN2-3-chr8_518_532_541	NP_443195-AN2-3-chr8-144396756-144397896-stop553-whim21
EIF3I	0.0672279	-1.03117	18.4815	-1.937	0.0141857	-3.07	-1.053	-1.559	0.006	1.064	-2.609	-2.036			EIF3I	EIF3I	EIF3I	EIF3I	NP_003748-AN1-10-chr1_300_299_308	NP_003748-AN1-10-chr1-32696620-32696721-stop324-whim2
SRRM1	0.974538	-0.21225	0.152039	0.007	0.965597	0.0441656	-0.037	-0.233	-0.251	-0.342	-0.273	0.13	-0.465	-0.227	SRRM1	SRRM1	SRRM1	SRRM1	NP_005830-AN1-10-chr1_467_459_468	NP_005830-AN1-10-chr1-24987290-24987803-stop504-whim12
COL6A2	0.0349815	0.0146667	24.1441	-0.67675	0.00385117	-3.9254	0.229	0.171	0.393	0.168	-0.367	-0.506			COL6A2	COL6A2	COL6A2	COL6A2	NP_001840-A-7-9_311_307_317	NP_001840-A-7-9-chr21-47536317-47536683-27-variant-whim30
MSN	0.941102	-0.13275	0.551898	0.0925	0.880664	0.153809	-1.034	-1.547	0.645	1.22	-0.591	-1	0.603	0.642	MSN	MSN	MSN	MSN	NP_002435-AN1-11-chrX_449_449_456	NP_002435-AN1-11-chrX-64958479-64958837-stop533-whim2
GAPDH	0.600601	0.054	3.7235	-0.198	0.424278	-0.852002			0.011	0.295			0.049	-0.139	GAPDH	GAPDH	GAPDH	GAPDH	NP_002037-AN1-2-chr12_44_119_139	NP_002037-AN1-2-chr12-6645759-6645850-stop336-whim12
MGA	0.908125	-0.02175	0.96825	-0.0565	0.800157	-0.263646	-0.041	0.054			-0.067	-0.033			MGA	MGA	MGA	MGA	NP_001157745-AN1-12-chr15_1480_1489_1502	NP_001157745-AN1-12-chr15-42028896-42032103-stop1594-whim12
GSTP1_1	0.955503	0.36225	0.442536	0.0305	0.903122	0.126514			0.546	0.148			0.431	0.324	GSTP1_1	GSTP1	GSTP1_1	GSTP1_1	NP_000843-AN1-5-chr11_113_104_115	NP_000843-AN1-5-chr11-67352712-67353577-stop152-whim12
C1orf35	0.667137	-0.0496667	3.04727	0.13325	0.495762	0.71145	-0.192	-0.085			0.096	0.14	0.007	-0.264	C1orf35	C1orf35	C1orf35	C1orf35	NP_077295-A-4-6_98_132_149	NP_077295-A-4-6-chr1-228290083-228290343-83-stop152-whim2
SF3B2	0.409449	-0.0226667	6.37608	-0.2315	0.230352	-1.29152	0.274	-0.039	0.043	-0.06			-0.191	-0.163	SF3B2	SF3B2	SF3B2	SF3B2	NP_006833-AN1-6-chr11_223_223_246	NP_006833-AN1-6-chr11-65824426-65824739-stop261-whim12
EFCAB4A	0.356683	0.16875	7.29269	0.3315	0.186522	1.47533	-0.12	0.126					0.383	0.286	EFCAB4A	EFCAB4A	EFCAB4A	EFCAB4A	NP_775855-AN1-6-chr11_263_311_321	NP_775855-AN1-6-chr11-830713-830811-stop482-whim2
TTC17	0.276879	0.126167	9.82352	0.51475	0.104147	1.81825			-0.346	-0.088	-0.162	0.002	0.664	0.687	TTC17	TTC17	TTC17	TTC17	NP_060729-AN1-16-chr11_752_767_784	NP_060729-AN1-16-chr11-43436326-43457713-stop812-whim12
FBLN2	0.168827	-0.116833	13.0483	0.5185	0.0495639	2.28602	-0.455	-0.47			-0.291	-0.109	0.389	0.235	FBLN2	FBLN2	FBLN2	FBLN2	NP_001004019-A-13-15_991_988_1005	NP_001004019-A-13-15-chr3-13671445-13672828-117-variant-whim12
PSIP1	0.324448	-0.494333	8.02006	1.01675	0.157759	1.5482	0.145	0.295	-1.995	-1.778			0.455	-0.088	PSIP1	PSIP1	PSIP1	PSIP1	NP_150091-AN2-7-chr9_326_316_326	NP_150091-AN2-7-chr9-15471208-15472629-stop327-whim2
ZC3H18	0.636548	-0.161	3.30505	0.165	0.467191	0.771761			-0.201	-0.286			-0.084	-0.073	ZC3H18	ZC3H18	ZC3H18	ZC3H18	NP_653205-AN1-2-chr16_230_230_249	NP_653205-AN1-2-chr16-88653092-88653949-stop308-whim12
TMEM68	0.421974	0.0295	6.01126	0.291	0.250538	1.26054			-0.185	-0.047	0.027	0.323			TMEM68	TMEM68	TMEM68	TMEM68	NP_689630-AN2-2-chr8_230_256_276	NP_689630-AN2-2-chr8-56656180-56663522-stop300-whim2
MPRIP_1	0.979027	-0.2265	0.0920528	-0.006	0.979027	-0.0273087	-0.141	-0.306					-0.171	-0.288	MPRIP_1	MPRIP	MPRIP_1	MPRIP_1	NP_055949-A-18-20_864_854_867	NP_055949-A-18-20-chr17-17077389-17079739-120-variant-whim21
CDV3	0.264417	-0.0395	10.2407	-0.8175	0.0946081	-1.87957			0.227	0.784	-1.144	-0.756	0.355	0.297	CDV3	CDV3	CDV3	CDV3	NP_001127894-AN1-2-chr3_107_100_115	NP_001127894-AN1-2-chr3-133293959-133302848-stop165-whim12
POSTN	0.251255	0.22	10.8101	-0.6735	0.0829834	-1.91502	1.303	0.927	-0.021	0.018	0.703	-0.135	-0.486	-0.549	POSTN	POSTN	POSTN	POSTN	NP_006466-A-4-8_670_663_674	NP_006466-A-4-8-chr13-38143958-38151889-261-whim30
CPSF6		-0.53925									-0.674	-0.8	-0.417	-0.266	CPSF6	CPSF6	CPSF6	CPSF6	NP_008938-AN1-5-chr12_232_251_268	NP_008938-AN1-5-chr12-69651685-69651814-stop293-whim12
NUDT5	0.211127	0.063	11.6881	-1.101	0.0677932	-2.09012	0.828	0.766			0.194	0.811	-0.92	-1.301	NUDT5	NUDT5	NUDT5	NUDT5	NP_054861-A-2-4_163_160_172	NP_054861-A-2-4-chr10-12212769-12214763-9-whim2
SSFA2	0.955503	0.0155	0.364736	-0.02325	0.919446	-0.104159	0.353	0.161	-0.128	-0.293	0.104	-0.104			SSFA2	SSFA2	SSFA2	SSFA2	NP_001123917-A-14-16_1049_1044_1060	NP_001123917-A-14-16-chr2-182784173-182786674-66-variant-whim6
HNRNPM_1		-0.1005									-0.173	-0.024	-0.051	-0.154	HNRNPM_1	HNRNPM	HNRNPM_1	HNRNPM_1	NP_005959-A-10-13_333_323_340	NP_005959-A-10-13-chr19-8536311-8548041-123-whim2
FLNA	0.264417	-0.046	10.3112	-0.32475	0.0930856	-1.88989			0.168	0.173	-0.319	-0.051	-0.099	-0.148	FLNA	FLNA	FLNA	FLNA	NP_001104026-A-39-41_410_401_417	NP_001104026-A-39-41-chrX-153593854-153594675-201-variant-whim30
KRT7_1	0.698972	0.21225	2.67699	-0.222	0.539885	-0.633525	-0.163	0.023	0.612	0.821	0.858	0.61	-0.483	-0.58	KRT7_1	KRT7	KRT7_1	KRT7_1	NP_005547-AN1-7-chr12_403_395_403	NP_005547-AN1-7-chr12-52639416-52641923-stop428-whim2
EIF4B	0.0261582	-0.0825	26.6558	1.111	0.00215985	4.88306	-0.538	-0.738			0.581	0.365			EIF4B	EIF4B	EIF4B	EIF4B	NP_001408-A-6-8_223_215_227	NP_001408-A-6-8-chr12-53416411-53421798-138-whim12
RAPGEF6	0.698972	0.217833	2.63548	-0.33575	0.54507	-0.630153	-0.432	-0.497	0.698	1.55	-0.166	0.154			RAPGEF6	RAPGEF6	RAPGEF6	RAPGEF6	NP_001157860-AN2-13-chr5_694_712_719	NP_001157860-AN2-13-chr5-130808513-130815205-stop720-whim30
RPTOR	0.574529	0.22775	4.03053	0.3025	0.395318	0.909531	0.248	-0.095			0.809	-0.051			RPTOR	RPTOR	RPTOR	RPTOR	NP_065812-AN1-18-chr17_701_776_786	NP_065812-AN1-18-chr17-78865637-78866530-stop831-whim2
KIAA0556	0.515935	-0.269833	4.61508	0.4895	0.345535	0.998344	-1.619	-0.388	-0.115	0.39	-0.302	0.415			KIAA0556	KIAA0556	KIAA0556	KIAA0556	NP_056017-A-5-7_137_133_150	NP_056017-A-5-7-chr16-27642483-27689049-132-variant-whim12
ZNF618		0.6385									0.022	0.238	1.262	1.032	ZNF618	ZNF618	ZNF618	ZNF618	NP_588615-AN1-10-chr9_270_326_336	NP_588615-AN1-10-chr9-116779064-116791012-stop388-whim12
HNRNPR		-0.355									-0.476	-0.234			HNRNPR	HNRNPR	HNRNPR	HNRNPR	NP_001095868-A-5-7_167_147_176	NP_001095868-A-5-7-chr1-23648156-23660010-177-variant-whim30
METAP1		0.778									0.499	1.057			METAP1	METAP1	METAP1	METAP1	NP_055958-AN1-6-chr4_172_148_172	NP_055958-AN1-6-chr4-99962277-99964472-stop173-whim30
MAP4_1	0.0537883	-0.272	20.9695	-0.824	0.00799934	-3.76015	0.212	0.068					-0.619	-0.749	MAP4_1	MAP4	MAP4_1	MAP4_1	NP_002366-A-16-18_75_64_84	NP_002366-A-16-18-chr3-47969840-48040127-69-variant-whim30
ZNF816-ZNF321P		0.53125									0.385	1.081	0.352	0.307	ZNF816-ZNF321P	ZNF816	ZNF816-ZNF321P	ZNF816-ZNF321P	NP_001189402-AN2-2-chr19_64_305_313	NP_001189402-AN2-2-chr19-53454834-53456003-stop651-whim2
RBM33	0.926762	0.02775	0.748229	0.0635	0.841738	0.207749	0.357	-0.365					0.226	-0.107	RBM33	RBM33	RBM33	RBM33	NP_444271-AN1-14-chr7_994_990_1010	NP_444271-AN1-14-chr7-155538296-155556502-stop1140-whim12
KDM1B	0.149437	0.34625	14.0057	0.5895	0.0397586	2.55994	-0.04	0.143			0.509	0.773			KDM1B	KDM1B	KDM1B	KDM1B	NP_694587-AN1-9-chr6_322_342_349	NP_694587-AN1-9-chr6-18200807-18201716-stop386-whim12
PXDN	0.282432	0.06825	9.30986	-0.3975	0.117223	-1.80357	0.351	0.183					-0.066	-0.195	PXDN	PXDN	PXDN	PXDN	NP_036425-A-19-21_118_114_135	NP_036425-A-19-21-chr2-1687923-1695699-72-variant-whim6
CAST_1		0.64575					0.203	0.042	0.987	1.351					CAST_1	CAST	CAST_1	CAST_1	NP_001035905-A-2-4_47_42_56	NP_001035905-A-2-4-chr5-96011305-96058342-72-whim12
AKAP9		0.4705											0.552	0.389	AKAP9	AKAP9	AKAP9	AKAP9	NP_005742-A-18-20_1640_1636_1654	NP_005742-A-18-20-chr7-91670212-91671981-141-variant-whim30
TTLL4		-0.315											-0.347	-0.283	TTLL4	TTLL4	TTLL4	TTLL4	NP_055455-AN1-6-chr2_659_736_751	NP_055455-AN1-6-chr2-219610954-219611752-stop755-whim2
DAB2IP	0.168827	-0.02875	13.2432	0.5385	0.0473893	2.4359	-0.257	-0.339			0.138	0.343			DAB2IP	DAB2IP	DAB2IP	DAB2IP	NP_115941-AN1-11-chr9_666_657_675	NP_115941-AN1-11-chr9-124533003-124534951-stop978-whim12
ZNF638		0.1045									-0.199	0.021	0.476	0.12	ZNF638	ZNF638	ZNF638	ZNF638	NP_001239542-AN1-9-chr2_793_783_806	NP_001239542-AN1-9-chr2-71607695-71615752-stop868-whim12
KANK1		0.0505											0.094	0.007	KANK1	KANK1	KANK1	KANK1	NP_001243806-A-4-6_1002_993_1008	NP_001243806-A-4-6-chr9-731266-734747-240-whim2
NUDC		-0.1645					-0.037	-0.292							NUDC	NUDC	NUDC	NUDC	NP_006591-AN1-4-chr1_144_143_155	NP_006591-AN1-4-chr1-27268309-27269147-stop220-whim12
FLNA_1	0.00145826	-0.536	43.9647	2.103	4.01356e-05	9.70079	-1.533	-1.642					0.571	0.46	FLNA_1	FLNA	FLNA_1	FLNA_1	NP_001104026-A-12-14_1896_1892_1901	NP_001104026-A-12-14-chrX-153581825-153582282-174-variant-whim30
ABLIM3	0.211127	0.212833	11.6885	-0.506	0.0677882	-2.09017	0.419	0.019	0.837	0.251	-0.038	-0.211			ABLIM3	ABLIM3	ABLIM3	ABLIM3	NP_055760-A-9-12_297_294_305	NP_055760-A-9-12-chr5-148612863-148619321-186-whim12
PAICS		NaN													PAICS	PAICS	PAICS	PAICS	NP_001072993-A-2-5_72_60_72	NP_001072993-A-2-5-chr4-57308026-57314583-200-stop73-whim2
NOLC1	0.0504197	0.211667	21.8784	-1.0295	0.0064887	-3.57597	1.315	0.481			0.094	0.146	-0.536	-0.23	NOLC1	NOLC1	NOLC1	NOLC1	NP_004732-AN1-10-chr10_581_580_589	NP_004732-AN1-10-chr10-103920850-103921013-stop614-whim12
CD82		0.48075									0.099	0.327	0.794	0.703	CD82	CD82	CD82	CD82	NP_002222-AN1-5-chr11_147_178_187	NP_002222-AN1-5-chr11-44636923-44639717-stop308-whim2
HNRNPA2B1	0.0629543	-0.134	18.9598	-1.027	0.0127064	-3.39796			0.211	0.548	-0.297	-0.998			HNRNPA2B1	HNRNPA2B1	HNRNPA2B1	HNRNPA2B1	NP_112533-A-3-6_206_204_218	NP_112533-A-3-6-chr7-26233314-26236176-144-whim2
MACF1_1		0.692									0.335	1.049			MACF1_1	MACF1	MACF1_1	MACF1_1	NP_036222-AN1-91-chr1_5303_5310_5320	NP_036222-AN1-91-chr1-39945681-39946591-stop5347-whim12
ABLIM3_1	0.0537883	0.322833	20.5728	-1.1825	0.00876431	-3.37927	0.541	0.196	1.099	1.032	0.06	-0.991			ABLIM3_1	ABLIM3	ABLIM3_1	ABLIM3_1	NP_055760-A-12-14_402_401_409	NP_055760-A-12-14-chr5-148619451-148622053-99-whim12
PCBP2_1		0.125							0.128	0.122					PCBP2_1	PCBP2	PCBP2_1	PCBP2_1	NP_005007-AN1-13-chr12_355_440_459	NP_005007-AN1-13-chr12-53865591-53868652-stop471-whim12
CCDC14		-0.5275					-0.718	-0.337							CCDC14	CCDC14	CCDC14	CCDC14	NP_073594-AN2-10-chr3_102_132_140	NP_073594-AN2-10-chr3-123674813-123675201-stop149-whim2
ETFA	0.409449	0.425167	6.51378	0.46925	0.223163	1.31354	-0.039	-0.422	0.577	0.959			0.826	0.65	ETFA	ETFA	ETFA	ETFA	NP_000117-AN2-2-chr15_323_322_330	NP_000117-AN2-2-chr15-76508935-76518189-stop333-whim2
ATXN2L_1		-0.1875											-0.168	-0.207	ATXN2L_1	ATXN2L	ATXN2L_1	ATXN2L_1	NP_680780-A-11-13_507_499_514	NP_680780-A-11-13-chr16-28843720-28844137-72-whim2
GLS	0.68518	0.106	2.86681	0.147	0.516796	0.676192			-0.049	0.065	-0.171	0.429	0.345	0.017	GLS	GLS	GLS	GLS	NP_055720-AN1-14-chr2_551_551_559	NP_055720-AN1-14-chr2-191796363-191797382-stop560-whim12
GATAD2A		-1.1425									-0.898	-1.387			GATAD2A	GATAD2A	GATAD2A	GATAD2A	NP_060130-A-8-10_501_500_507	NP_060130-A-8-10-chr19-19612225-19613139-75-whim12
FMR1_1		-0.053					-0.099	-0.007							FMR1_1	FMR1	FMR1_1	FMR1_1	NP_002015-AN1-16-chrX_580_573_580	NP_002015-AN1-16-chrX-147027136-147029932-stop583-whim12
DCAF10	0.914524	-0.5425	0.850055	0.059	0.822232	0.233866	-0.345	-0.799			-0.608	-0.418			DCAF10	DCAF10	DCAF10	DCAF10	NP_077321-A-4-6_352_347_356	NP_077321-A-4-6-chr9-37854979-37860044-111-whim12
KHDRBS1		-0.561					-0.483	-0.639							KHDRBS1	KHDRBS1	KHDRBS1	KHDRBS1	NP_006550-A-5-7_303_347_354	NP_006550-A-5-7-chr1-32502644-32504152-202-stop356-whim12
RNF123		0.459											0.687	0.231	RNF123	RNF123	RNF123	RNF123	NP_071347-A-21-23_654_671_678	NP_071347-A-21-23-chr3-49742189-49742966-199-stop690-whim2
CLMN		0.305							0.179	0.431					CLMN	CLMN	CLMN	CLMN	NP_079010-A-8-10_109_103_110	NP_079010-A-8-10-chr14-95679746-95688027-93-whim2
DHX35	0.0206377	0.8805	29.6186	-1.552	0.00109178	-5.53891	1.828	1.485			0.387	-0.178			DHX35	DHX35	DHX35	DHX35	NP_068750-A-18-20_602_623_630	NP_068750-A-18-20-chr20-37654002-37659346-82-stop639-whim2
ZNF185		-0.189					0.029	-0.407							ZNF185	ZNF185	ZNF185	ZNF185	NP_001171577-A-10-12_247_240_248	NP_001171577-A-10-12-chrX-152090800-152097118-90-whim12
XPR1		1.2715							0.837	1.706					XPR1	XPR1	XPR1	XPR1	NP_004727-AN1-9-chr1_379_377_386	NP_004727-AN1-9-chr1-180794480-180799802-stop394-whim6
EWSR1_1		0.0865									0.125	0.048			EWSR1_1	EWSR1	EWSR1_1	EWSR1_1	NP_053733-AN1-14-chr22_483_477_485	NP_053733-AN1-14-chr22-29693939-29694740-stop543-whim4
DDX3X	0.0585262	-0.1865	19.6905	-0.952	0.0107388	-3.52787			0.008	0.571			-0.556	-0.769	DDX3X	DDX3X	DDX3X	DDX3X	NP_001180346-AN1-2-chrX_35_36_43	NP_001180346-AN1-2-chrX-41196718-41198291-stop58-whim12
HMGN3	0.0324238	0.16725	25.2656	-1.1835	0.00297466	-4.59332	0.894	0.624			-0.198	-0.651			HMGN3	HMGN3	HMGN3	HMGN3	NP_001188291-AN2-2-chr6_50_120_127	NP_001188291-AN2-2-chr6-79912596-79913296-stop192-whim2
PPIA		-0.164							-0.115	-0.213					PPIA	PPIA	PPIA	PPIA	NP_066953-AN1-4-chr7_120_92_120	NP_066953-AN1-4-chr7-44839473-44840022-stop121-whim12
MTMR11		0.0175											-0.363	0.398	MTMR11	MTMR11	MTMR11	MTMR11	NP_001139334-A-11-14_109_106_115	NP_001139334-A-11-14-chr1-149906219-149907191-222-whim2
RAPGEF6_1	0.00145826	-0.5885	46.4946	-2.538	2.24152e-05	-10.6561			0.557	0.804			-1.707	-2.008	RAPGEF6_1	RAPGEF6	RAPGEF6_1	RAPGEF6_1	NP_001157859-AN2-4-chr5_1263_1262_1280	NP_001157859-AN2-4-chr5-130772098-130775273-stop1413-whim2
TRIO		-0.106					-0.189	-0.023							TRIO	TRIO	TRIO	TRIO	NP_009049-AN1-2-chr5_78_73_85	NP_009049-AN1-2-chr5-14271008-14272473-stop117-whim2
LPIN1	0.862158	-0.767167	1.42798	-0.14275	0.719783	-0.370836	-0.348	-0.996			-1.477	-1.216	-0.188	-0.378	LPIN1	LPIN1	LPIN1	LPIN1	NP_001248357-AN1-18-chr2_800_797_809	NP_001248357-AN1-18-chr2-11945282-11945672-stop882-whim2
FBXO38		0.1495					0.388	0.268	-0.069	0.011					FBXO38	FBXO38	FBXO38	FBXO38	NP_001258652-AN1-13-chr5_640_803_813	NP_001258652-AN1-13-chr5-147805264-147806772-stop898-whim2
KIRREL		0.016					-0.425	-0.327	0.379	0.437					KIRREL	KIRREL	KIRREL	KIRREL	NP_060710-AN1-8-chr1_349_345_375	NP_060710-AN1-8-chr1-158058244-158059243-stop414-whim12
MPRIP_2		0.8925											1.045	0.74	MPRIP_2	MPRIP	MPRIP_2	MPRIP_2	NP_055949-AN1-6-chr17_246_296_305	NP_055949-AN1-6-chr17-17039764-17041445-stop346-whim2
ZKSCAN7		-0.46											-0.437	-0.483	ZKSCAN7	ZKSCAN7	ZKSCAN7	ZKSCAN7	NP_079445-AN1-4-chr3_272_437_445	NP_079445-AN1-4-chr3-44609925-44611416-stop754-whim12
PRKCSH_1		0.2925											0.371	0.214	PRKCSH_1	PRKCSH	PRKCSH_1	PRKCSH_1	NP_001001329-AN1-7-chr19_229_207_235	NP_001001329-AN1-7-chr19-11556288-11557062-stop304-whim12
GRB14		0.9995									0.827	1.172			GRB14	GRB14	GRB14	GRB14	NP_004481-AN2-13-chr2_109_125_137	NP_004481-AN2-13-chr2-165424914-165476196-stop183-whim2
NCLN	0.60917	-0.16775	3.60594	0.1955	0.43592	0.829684	-0.329	-0.202					0.103	-0.243	NCLN	NCLN	NCLN	NCLN	NP_064555-AN1-11-chr19_446_433_463	NP_064555-AN1-11-chr19-3206188-3206262-stop524-whim12
ESRP1		-0.1565											-0.141	-0.172	ESRP1	ESRP1	ESRP1	ESRP1	NP_060167-A-13-15_608_583_611	NP_060167-A-13-15-chr8-95690599-95709079-151-stop637-whim2
NT5C2		NaN													NT5C2	NT5C2	NT5C2	NT5C2	NP_036361-AN2-5-chr10_386_368_386	NP_036361-AN2-5-chr10-104851361-104852895-stop387-whim6
EPN2		0.4835					0.585	0.382							EPN2	EPN2	EPN2	EPN2	NP_055779-AN1-4-chr17_325_324_344	NP_055779-AN1-4-chr17-19215457-19216435-stop385-whim12
HNRNPA3	0.139064	0.01525	14.4705	0.7805	0.0357228	2.63604	-0.485	-0.265			0.049	0.762			HNRNPA3	HNRNPA3	HNRNPA3	HNRNPA3	NP_919223-A-7-9_275_258_300	NP_919223-A-7-9-chr2-178081668-178083764-141-whim12
HNRNPA2B1_1	0.0206377	1.17	29.1906	2.049	0.00120488	5.44072	0.327	-0.036			1.662	2.727			HNRNPA2B1_1	HNRNPA2B1	HNRNPA2B1_1	HNRNPA2B1_1	NP_112533-A-2-4_254_239_277	NP_112533-A-2-4-chr7-26232993-26235466-120-whim12
LSM14B		NaN													LSM14B	LSM14B	LSM14B	LSM14B	NP_653304-AN1-3-chr20_143_119_144	NP_653304-AN1-3-chr20-60701495-60702640-stop222-whim12
CAMSAP3		-0.163									-0.316	-0.01			CAMSAP3	CAMSAP3	CAMSAP3	CAMSAP3	NP_001073898-A-4-6_208_192_215	NP_001073898-A-4-6-chr19-7671457-7672706-33-variant-whim30
ELN		1.7525											1.964	1.541	ELN	ELN	ELN	ELN	NP_001265868-A-19-21_384_383_393	NP_001265868-A-19-21-chr7-73469099-73471001-165-whim2
CHD3		NaN													CHD3	CHD3	CHD3	CHD3	NP_001005271-AN1-36-chr17_1858_2014_2024	NP_001005271-AN1-36-chr17-7812147-7812598-stop2054-whim30
HNRNPM_2		NaN													HNRNPM_2	HNRNPM	HNRNPM_2	HNRNPM_2	NP_005959-A-10-12_335_323_347	NP_005959-A-10-12-chr19-8536311-8539050-45-whim12
EPB41L1		0.0155									-0.187	0.218			EPB41L1	EPB41L1	EPB41L1	EPB41L1	NP_036288-AN1-16-chr20_757_739_760	NP_036288-AN1-16-chr20-34802362-34806800-stop820-whim12
GMIP		NaN													GMIP	GMIP	GMIP	GMIP	NP_057657-A-7-9_443_434_458	NP_057657-A-7-9-chr19-19746378-19747515-78-whim12
SH3PXD2A	0.509735	0.592	4.84984	-0.242	0.327353	-1.0584	0.824	0.602					0.576	0.366	SH3PXD2A	SH3PXD2A	SH3PXD2A	SH3PXD2A	NP_055446-A-7-9_143_142_163	NP_055446-A-7-9-chr10-105420872-105452785-45-whim12
SIL1		0.6095							0.486	0.733					SIL1	SIL1	SIL1	SIL1	NP_071909-A-3-5_216_271_288	NP_071909-A-3-5-chr5-138287573-138362489-122-stop310-whim12
BPTF		0.0355					-0.032	0.103							BPTF	BPTF	BPTF	BPTF	NP_872579-AN1-24-chr17_2761_2780_2790	NP_872579-AN1-24-chr17-65955991-65959448-stop2813-whim12
ACTN4_1		NaN													ACTN4_1	ACTN4	ACTN4_1	ACTN4_1	NP_004915-AN1-18-chr19_780_781_791	NP_004915-AN1-18-chr19-39217743-39218955-stop866-whim12
NFIA		0.867									0.75	0.984			NFIA	NFIA	NFIA	NFIA	NP_001138984-AN1-8-chr1_404_407_418	NP_001138984-AN1-8-chr1-61849037-61851542-stop436-whim2
KDM1B_1		-0.05375									0.036	0.164	-0.285	-0.13	KDM1B_1	KDM1B	KDM1B_1	KDM1B_1	NP_694587-AN1-6-chr6_192_240_250	NP_694587-AN1-6-chr6-18186041-18188022-stop279-whim12
VPS13D		0.2265											0.213	0.24	VPS13D	VPS13D	VPS13D	VPS13D	NP_056193-AN1-38-chr1_2851_2835_2851	NP_056193-AN1-38-chr1-12395884-12401839-stop2907-whim12
LMNB1		NaN													LMNB1	LMNB1	LMNB1	LMNB1	NP_005564-AN1-3-chr5_215_210_219	NP_005564-AN1-3-chr5-126141388-126145874-stop272-whim12
VCL		0.0435									0.085	0.002			VCL	VCL	VCL	VCL	NP_054706-A-6-9_262_247_262	NP_054706-A-6-9-chr10-75834661-75848953-239-stop334-whim30
LSP1		-2.193											-2.064	-2.322	LSP1	LSP1	LSP1	LSP1	NP_001229861-A-2-4_193_189_200	NP_001229861-A-2-4-chr11-1901454-1904648-165-whim2
ATP6V1B2		0.266											0.393	0.139	ATP6V1B2	ATP6V1B2	ATP6V1B2	ATP6V1B2	NP_001684-AN1-11-chr8_388_397_409	NP_001684-AN1-11-chr8-20074006-20074703-stop457-whim2
RPS12		0.885									0.571	1.199			RPS12	RPS12	RPS12	RPS12	NP_001007-AN1-4-chr6_113_103_113	NP_001007-AN1-4-chr6-133138200-133138588-stop143-whim2
EPB41L1_1		-0.077									-0.369	0.215			EPB41L1_1	EPB41L1	EPB41L1_1	EPB41L1_1	NP_036288-A-16-19_757_739_759	NP_036288-A-16-19-chr20-34802362-34809785-171-whim2
TMED9		0.0665									-0.408	0.541			TMED9	TMED9	TMED9	TMED9	NP_059980-AN1-3-chr5_138_152_160	NP_059980-AN1-3-chr5-177020776-177021160-stop190-whim12
SLC35A2		-1.1575					-1.245	-1.07							SLC35A2	SLC35A2	SLC35A2	SLC35A2	NP_001027460-AN2-2-chrX_143_304_314	NP_001027460-AN2-2-chrX-48762537-48763668-stop320-whim6
FLYWCH1		-0.0975									-0.253	0.058			FLYWCH1	FLYWCH1	FLYWCH1	FLYWCH1	NP_115672-AN1-1-chr16_110_106_118	NP_115672-AN1-1-chr16-2980011-2980410-stop371-whim12
C11orf84		0.694							0.716	0.672					C11orf84	C11orf84	C11orf84	C11orf84	NP_612480-AN1-5-chr11_312_316_328	NP_612480-AN1-5-chr11-63586474-63594437-stop343-whim12
ZC3H14		0.5535									0.422	0.685			ZC3H14	ZC3H14	ZC3H14	ZC3H14	NP_079100-A-8-10_375_369_379	NP_079100-A-8-10-chr14-89042284-89063077-156-variant-whim30
TCOF1		0.1055					-0.153	-0.168	0.351	0.392					TCOF1	TCOF1	TCOF1	TCOF1	NP_001182070-AN1-17-chr5_955_970_978	NP_001182070-AN1-17-chr5-149759295-149762609-stop1044-whim2
QKI		NaN													QKI	QKI	QKI	QKI	NP_996735-AN1-5-chr6_213_211_219	NP_996735-AN1-5-chr6-163983101-163984475-stop319-whim12
REPS2		-0.1475									-0.232	-0.063			REPS2	REPS2	REPS2	REPS2	NP_004717-A-11-14_447_439_447	NP_004717-A-11-14-chrX-17088116-17121840-183-whim12
HGS		-1.152							-2.366	0.062					HGS	HGS	HGS	HGS	NP_004703-AN1-12-chr17_326_292_326	NP_004703-AN1-12-chr17-79661883-79661989-stop380-whim30
CSE1L		0.196					0.328	-0.117	0.142	0.431					CSE1L	CSE1L	CSE1L	CSE1L	NP_001307-AN1-3-chr20_111_110_122	NP_001307-AN1-3-chr20-47682830-47682988-stop134-whim2
MLLT4	0.00145826	-0.76575	45.4578	2.4515	2.84588e-05	10.2549			-1.833	-2.15	0.341	0.579			MLLT4	MLLT4	MLLT4	MLLT4	NP_001035089-AN1-2-chr6_102_91_103	NP_001035089-AN1-2-chr6-168265426-168271062-stop144-whim12
MTCH2		-0.2775					-0.39	-0.165							MTCH2	MTCH2	MTCH2	MTCH2	NP_055157-A-9-11_94_91_102	NP_055157-A-9-11-chr11-47656286-47660250-27-whim12
RAB19		0.5515							0.244	0.859					RAB19	RAB19	RAB19	RAB19	NP_001008749-AN1-1-chr7_68_68_76	NP_001008749-AN1-1-chr7-140107647-140111679-stop129-whim2
PPA2		1.324											1.413	1.235	PPA2	PPA2	PPA2	PPA2	NP_789845-A-8-11_75_74_85	NP_789845-A-8-11-chr4-106367659-106377837-99-whim2
SEC31A_1		-0.1285					0.077	-0.334							SEC31A_1	SEC31A	SEC31A_1	SEC31A_1	NP_001070676-AN2-8-chr4_835_826_835	NP_001070676-AN2-8-chr4-83766447-83769956-stop836-whim12
GOLGA3	0.289323	-0.05975	8.94802	0.4105	0.127408	1.74524	-0.084	-0.446					0.169	0.122	GOLGA3	GOLGA3	GOLGA3	GOLGA3	NP_005886-A-21-23_46_43_55	NP_005886-A-21-23-chr12-133390005-133398581-273-whim2
KLC1		0.1555					0.143	0.168							KLC1	KLC1	KLC1	KLC1	NP_891553-AN1-12-chr14_551_553_560	NP_891553-AN1-12-chr14-104145882-104159889-stop572-whim12
NCOR2		0.15											0.51	-0.21	NCOR2	NCOR2	NCOR2	NCOR2	NP_006303-AN2-6-chr12_2252_2245_2252	NP_006303-AN2-6-chr12-124817011-124817675-stop2297-whim12
ESPN		0.19									0.071	0.309			ESPN	ESPN	ESPN	ESPN	NP_113663-AN1-10-chr1_776_1058_1067	NP_113663-AN1-10-chr1-6512156-6514493-stop1363-whim2
ANLN		NaN													ANLN	ANLN	ANLN	ANLN	NP_061155-AN1-20-chr7_962_970_979	NP_061155-AN1-20-chr7-36466637-36467915-stop987-whim12
EFCAB4A_1		NaN													EFCAB4A_1	EFCAB4A	EFCAB4A_1	EFCAB4A_1	NP_775855-AN1-3-chr11_153_243_256	NP_775855-AN1-3-chr11-829540-829967-stop295-whim2
UCHL5		NaN													UCHL5	UCHL5	UCHL5	UCHL5	NP_057068-AN2-7-chr1_147_146_153	NP_057068-AN2-7-chr1-192998436-192998517-stop329-whim2
PATL1		0.0235									-0.089	0.136			PATL1	PATL1	PATL1	PATL1	NP_689929-A-12-14_242_232_246	NP_689929-A-12-14-chr11-59423213-59423971-90-whim12
KIF1B		NaN													KIF1B	KIF1B	KIF1B	KIF1B	NP_904325-AN1-11-chr1_388_379_390	NP_904325-AN1-11-chr1-10338186-10342379-stop466-whim12
ACTG1	0.211127	-0.93675	11.7058	0.4885	0.0675174	2.18803			-1.255	-1.107	-0.792	-0.593			ACTG1	ACTG1	ACTG1	ACTG1	NP_001605-AN2-3-chr17_269_257_284	NP_001605-AN2-3-chr17-79478085-79478213-stop309-whim30
GRK5		0.6885									0.495	0.882			GRK5	GRK5	GRK5	GRK5	NP_005299-A-6-9_179_179_186	NP_005299-A-6-9-chr10-121184597-121196162-205-stop195-whim30
SARS		0.221					0.208	0.234							SARS	SARS	SARS	SARS	NP_006504-AN1-9-chr1_420_432_440	NP_006504-AN1-9-chr1-109779170-109779426-stop517-whim12
KLC1_1		0.0895					0.202	-0.023							KLC1_1	KLC1	KLC1_1	KLC1_1	NP_891553-AN1-11-chr14_497_498_505	NP_891553-AN1-11-chr14-104143860-104145645-stop601-whim12
XYLB		0.6085							0.633	0.584					XYLB	XYLB	XYLB	XYLB	NP_005099-AN1-2-chr3_48_42_66	NP_005099-AN1-2-chr3-38390123-38397232-stop67-whim30
WDR45B		0.16575									0.596	1.312	-0.408	-0.837	WDR45B	WDR45B	WDR45B	WDR45B	NP_062559-AN2-5-chr17_209_212_231	NP_062559-AN2-5-chr17-80576957-80579484-stop244-whim12
HYOU1		0.545									0.221	0.542	0.728	0.689	HYOU1	HYOU1	HYOU1	HYOU1	NP_006380-AN2-8-chr11_752_739_756	NP_006380-AN2-8-chr11-118919077-118919187-stop767-whim2
UBE2K		NaN													UBE2K	UBE2K	UBE2K	UBE2K	NP_005330-AN1-2-chr4_54_62_79	NP_005330-AN1-2-chr4-39739133-39744911-stop89-whim2
IGBP1	0.883395	0.4815	1.18235	0.076	0.761666	0.316234			0.241	0.646			0.503	0.536	IGBP1	IGBP1	IGBP1	IGBP1	NP_001542-A-1-3_63_52_63	NP_001542-A-1-3-chrX-69353985-69366482-294-whim30
IL17RE	0.0765913	-0.138	17.7304	0.873	0.0168641	3.18353	-0.318	-0.831			0.118	0.479			IL17RE	IL17RE	IL17RE	IL17RE	NP_001180309-AN1-13-chr3_433_600_614	NP_001180309-AN1-13-chr3-9955708-9956085-stop717-whim2
TRAF5		-0.178					-0.136	-0.22							TRAF5	TRAF5	TRAF5	TRAF5	NP_004610-A-3-7_128_120_128	NP_004610-A-3-7-chr1-211529810-211538717-318-whim2
LDHA		0.37475					0.437	-0.024	0.638	0.448					LDHA	LDHA	LDHA	LDHA	NP_001158886-AN1-2-chr11_72_80_91	NP_001158886-AN1-2-chr11-18418515-18424415-stop143-whim2
ADAT1		-0.5095					-0.312	-0.707							ADAT1	ADAT1	ADAT1	ADAT1	NP_036223-A-2-5_349_344_353	NP_036223-A-2-5-chr16-75637069-75646140-246-variant-whim30
TCF25		-0.265					-0.594	0.064							TCF25	TCF25	TCF25	TCF25	NP_055787-A-15-17_574_582_593	NP_055787-A-15-17-chr16-89972692-89976998-80-stop643-whim2
PSMC1		0.456							0.504	0.408					PSMC1	PSMC1	PSMC1	PSMC1	NP_002793-AN1-10-chr14_397_388_397	NP_002793-AN1-10-chr14-90736696-90738629-stop400-whim2
KDM8		0.54									0.467	0.613			KDM8	KDM8	KDM8	KDM8	NP_001138820-A-4-6_305_300_309	NP_001138820-A-4-6-chr16-27226329-27230281-45-whim12
PAK2		-0.3345											-0.253	-0.416	PAK2	PAK2	PAK2	PAK2	NP_002568-AN1-1-chr3_64_63_70	NP_002568-AN1-1-chr3-196509704-196510260-stop94-whim2
RPLP0		-0.0035									-0.117	0.11			RPLP0	RPLP0	RPLP0	RPLP0	NP_444505-AN2-5-chr12_108_107_120	NP_444505-AN2-5-chr12-120636761-120636920-stop304-whim2
TASP1	0.297026	-0.22925	8.48629	0.4885	0.141701	1.67053	-0.784	-0.163			-0.174	0.204			TASP1	TASP1	TASP1	TASP1	NP_060184-AN2-11-chr20_95_76_97	NP_060184-AN2-11-chr20-13600402-13604092-stop115-whim2
HEATR2		0.2305					0.293	0.168							HEATR2	HEATR2	HEATR2	HEATR2	NP_060272-AN1-12-chr7_811_879_892	NP_060272-AN1-12-chr7-819781-821681-stop1170-whim2
TNFRSF21		-0.123									-0.269	0.023			TNFRSF21	TNFRSF21	TNFRSF21	TNFRSF21	NP_055267-AN2-4-chr6_416_433_446	NP_055267-AN2-4-chr6-47244004-47251673-stop450-whim30
NUP133	0.282432	0.2605	9.23756	-0.381	0.119191	-1.79193	0.456	0.446					0.083	0.057	NUP133	NUP133	NUP133	NUP133	NP_060700-AN2-6-chr1_994_1015_1022	NP_060700-AN2-6-chr1-229588601-229593907-stop1034-whim30
LGALS1		-0.1835									-0.096	-0.271			LGALS1	LGALS1	LGALS1	LGALS1	NP_002296-AN1-2-chr22_31_30_40	NP_002296-AN1-2-chr22-38073072-38074516-stop115-whim2
RASGEF1B		-0.2775									-0.356	-0.199			RASGEF1B	RASGEF1B	RASGEF1B	RASGEF1B	NP_689758-AN2-11-chr4_147_141_151	NP_689758-AN2-11-chr4-82373589-82377804-stop155-whim30
TLE2	0.0994469	-0.52125	16.2486	0.9765	0.0237213	2.9313	-1.425	-0.594					0.174	-0.24	TLE2	TLE2	TLE2	TLE2	NP_001138233-AN2-16-chr19_92_132_155	NP_001138233-AN2-16-chr19-3025105-3027826-stop220-whim12
DLEC1		-0.172					-1.916	-0.231	0.558	0.901					DLEC1	DLEC1	DLEC1	DLEC1	NP_031361-AN1-22-chr3_1088_1103_1114	NP_031361-AN1-22-chr3-38151053-38151580-stop1207-whim30
DGKD		0.0935											0.302	-0.115	DGKD	DGKD	DGKD	DGKD	NP_690618-AN1-15-chr2_631_630_642	NP_690618-AN1-15-chr2-234358022-234358604-stop1223-whim2
ULK2		-0.315					-0.682	0.052							ULK2	ULK2	ULK2	ULK2	NP_001136082-AN2-18-chr17_263_273_282	NP_001136082-AN2-18-chr17-19729525-19741813-stop285-whim6
BRE		0.5295											0.772	0.287	BRE	BRE	BRE	BRE	NP_004890-AN1-6-chr2_227_239_248	NP_004890-AN1-6-chr2-28352247-28375342-stop249-whim2
TTYH3		-0.15025									0.139	0.362	-0.447	-0.655	TTYH3	TTYH3	TTYH3	TTYH3	NP_079526-AN1-8-chr7_310_330_341	NP_079526-AN1-8-chr7-2691876-2695746-stop345-whim2
ZFYVE27	0.809461	-0.018	1.74988	0.115	0.668362	0.448347	-0.155	0.004			0.287	-0.208			ZFYVE27	ZFYVE27	ZFYVE27	ZFYVE27	NP_001167590-A-1-3_58_46_58	NP_001167590-A-1-3-chr10-99498406-99508025-187-stop59-whim12
DSN1		1.1755									0.748	1.603			DSN1	DSN1	DSN1	DSN1	NP_079194-A-6-9_119_109_127	NP_079194-A-6-9-chr20-35390951-35399275-147-whim2
POU2F3	0.0878946	1.35775	16.9552	-1.5555	0.0201593	-3.0508	2.972	1.299					0.639	0.521	POU2F3	POU2F3	POU2F3	POU2F3	NP_001231611-AN1-3-chr11_47_63_74	NP_001231611-AN1-3-chr11-120139953-120156104-stop92-whim2
CCDC125		-0.3315							-0.327	-0.336					CCDC125	CCDC125	CCDC125	CCDC125	NP_789786-AN2-7-chr5_207_207_220	NP_789786-AN2-7-chr5-68599771-68602643-stop517-whim12
GAPDH_1		0.22											0.271	0.169	GAPDH_1	GAPDH	GAPDH_1	GAPDH_1	NP_001243728-AN1-1-chr12_2_77_97	NP_001243728-AN1-1-chr12-6645759-6645850-stop294-whim12
NID2		0.487							0.362	0.612					NID2	NID2	NID2	NID2	NP_031387-A-10-12_844_840_852	NP_031387-A-10-12-chr14-52486896-52495439-144-variant-whim12
CCT5		-0.3165											-0.42	-0.213	CCT5	CCT5	CCT5	CCT5	NP_036205-A-2-4_56_50_71	NP_036205-A-2-4-chr5-10254317-10256066-165-whim12
SERBP1		NaN													SERBP1	SERBP1	SERBP1	SERBP1	NP_001018079-A-4-6_203_202_228	NP_001018079-A-4-6-chr1-67889960-67890765-90-variant-whim4
CHI3L1		0.361									0.085	0.637			CHI3L1	CHI3L1	CHI3L1	CHI3L1	NP_001267-A-2-4_238_225_243	NP_001267-A-2-4-chr1-203149005-203150289-183-whim12
COL12A1		0.353									0.253	0.453			COL12A1	COL12A1	COL12A1	COL12A1	NP_004361-A-53-55_813_788_814	NP_004361-A-53-55-chr6-75875495-75887378-273-variant-whim12
C19orf33		NaN													C19orf33	C19orf33	C19orf33	C19orf33	NP_277055-AN1-2-chr19_47_68_82	NP_277055-AN1-2-chr19-38795130-38795204-stop86-whim2
ESPN_1		NaN													ESPN_1	ESPN	ESPN_1	ESPN_1	NP_113663-A-8-11_639_640_651	NP_113663-A-8-11-chr1-6509151-6517243-410-stop697-whim6
EXOSC2		NaN													EXOSC2	EXOSC2	EXOSC2	EXOSC2	NP_055100-AN1-4-chr9_120_104_120	NP_055100-AN1-4-chr9-133573638-133574689-stop121-whim30
RNF213		1.148											1.397	0.899	RNF213	RNF213	RNF213	RNF213	NP_001243000-AN1-2-chr17_88_81_115	NP_001243000-AN1-2-chr17-78247203-78252562-stop192-whim12
RHOT2		0.2245									0.13	0.319			RHOT2	RHOT2	RHOT2	RHOT2	NP_620124-AN1-9-chr16_214_195_215	NP_620124-AN1-9-chr16-720773-720888-stop315-whim2
MFGE8		0.016									-0.281	0.313			MFGE8	MFGE8	MFGE8	MFGE8	NP_001108086-AN2-3-chr15_230_257_264	NP_001108086-AN2-3-chr15-89444917-89448987-stop304-whim2
FBRSL1		NaN													FBRSL1	FBRSL1	FBRSL1	FBRSL1	NP_001136113-AN1-11-chr12_529_529_537	NP_001136113-AN1-11-chr12-133149208-133150675-stop592-whim12
GSN		0.5995					0.863	0.336							GSN	GSN	GSN	GSN	NP_001121135-AN1-1-chr9_34_40_59	NP_001121135-AN1-1-chr9-124044828-124064201-stop117-whim12
PYGB		0.504									0.369	0.639			PYGB	PYGB	PYGB	PYGB	NP_002853-AN1-4-chr20_177_198_211	NP_002853-AN1-4-chr20-25252122-25255212-stop279-whim30
NIPAL2		1.329											1.446	1.212	NIPAL2	NIPAL2	NIPAL2	NIPAL2	NP_079035-A-3-5_295_342_362	NP_079035-A-3-5-chr8-99207050-99215335-64-stop372-whim2
WNK2		0.344											0.509	0.179	WNK2	WNK2	WNK2	WNK2	NP_006639-AN1-20-chr9_1646_1633_1650	NP_006639-AN1-20-chr9-96052329-96054592-stop1706-whim2
GSTP1_2		NaN													GSTP1_2	GSTP1	GSTP1_2	GSTP1_2	NP_000843-A-2-5_14_13_36	NP_000843-A-2-5-chr11-67351640-67352608-195-whim12
ANKHD1-EIF4EBP3		NaN													ANKHD1-EIF4EBP3	ANKHD1	ANKHD1-EIF4EBP3	ANKHD1-EIF4EBP3	NP_065741-AN1-2-chr5_154_146_159	NP_065741-AN1-2-chr5-139815842-139818087-stop205-whim12
EPB41L3		NaN													EPB41L3	EPB41L3	EPB41L3	EPB41L3	NP_036439-A-5-7_784_770_784	NP_036439-A-5-7-chr18-5397425-5406775-123-whim30
ZNF462		NaN													ZNF462	ZNF462	ZNF462	ZNF462	NP_067047-AN1-3-chr9_2005_2005_2022	NP_067047-AN1-3-chr9-109692970-109694543-stop2113-whim12
SUV420H2		-0.9585											-1.081	-0.836	SUV420H2	SUV420H2	SUV420H2	SUV420H2	NP_116090-AN1-6-chr19_236_226_236	NP_116090-AN1-6-chr19-55857717-55857872-stop237-whim2
SUN2		0.0955											0.186	0.005	SUN2	SUN2	SUN2	SUN2	NP_056189-A-14-16_97_84_108	NP_056189-A-14-16-chr22-39146325-39147214-138-variant-whim2
NASP		0.1205									0.078	0.163			NASP	NASP	NASP	NASP	NP_002473-A-12-14_694_672_694	NP_002473-A-12-14-chr1-46082065-46083134-78-whim2
RB1		NaN													RB1	RB1	RB1	RB1	NP_000312-A-13-15_445_433_448	NP_000312-A-13-15-chr13-48951170-48954188-57-whim6
HOOK3		0.5915											0.729	0.454	HOOK3	HOOK3	HOOK3	HOOK3	NP_115786-AN1-2-chr8_49_55_66	NP_115786-AN1-2-chr8-42761401-42780681-stop93-whim2
CC2D1A		-0.2					-0.037	-0.363							CC2D1A	CC2D1A	CC2D1A	CC2D1A	NP_060191-AN1-23-chr19_819_806_823	NP_060191-AN1-23-chr19-14038843-14038939-stop846-whim12
ADD1		1.0975					1.276	0.919							ADD1	ADD1	ADD1	ADD1	NP_789771-AN1-11-chr4_567_563_591	NP_789771-AN1-11-chr4-2910331-2911065-stop641-whim12
NPEPL1		0.4985											0.463	0.534	NPEPL1	NPEPL1	NPEPL1	NPEPL1	NP_078939-AN1-8-chr20_334_358_369	NP_078939-AN1-8-chr20-57287635-57288406-stop415-whim30
KIAA1217		NaN													KIAA1217	KIAA1217	KIAA1217	KIAA1217	NP_062536-A-16-18_1139_1133_1148	NP_062536-A-16-18-chr10-24822166-24831621-120-variant-whim6
ZFAND1		0.516									0.557	0.475			ZFAND1	ZFAND1	ZFAND1	ZFAND1	NP_001164267-A-4-7_32_19_32	NP_001164267-A-4-7-chr8-82627130-82630416-168-stop33-whim2
LTBR		0.407											0.496	0.318	LTBR	LTBR	LTBR	LTBR	NP_002333-A-6-8_224_212_227	NP_002333-A-6-8-chr12-6495610-6497965-108-variant-whim2
PLAA		0.237					0.285	0.189							PLAA	PLAA	PLAA	PLAA	NP_001026859-A-4-6_474_457_476	NP_001026859-A-4-6-chr9-26913945-26919307-69-whim12
HMGN2		-0.8345							-0.814	-0.855					HMGN2	HMGN2	HMGN2	HMGN2	NP_005508-AN1-4-chr1_48_64_75	NP_005508-AN1-4-chr1-26800626-26801065-stop83-whim2
SLAIN2		1.0565											1.147	0.966	SLAIN2	SLAIN2	SLAIN2	SLAIN2	NP_065897-AN1-6-chr4_454_470_478	NP_065897-AN1-6-chr4-48385801-48396592-stop495-whim12
EPB41_1		NaN													EPB41_1	EPB41	EPB41_1	EPB41_1	NP_001159477-AN1-10-chr1_548_542_553	NP_001159477-AN1-10-chr1-29365938-29379618-stop630-whim12
GOLGA4		0.0075									-0.011	0.026			GOLGA4	GOLGA4	GOLGA4	GOLGA4	NP_001166184-AN1-13-chr3_539_565_573	NP_001166184-AN1-13-chr3-37360685-37369910-stop578-whim2
TUBB2A		NaN													TUBB2A	TUBB2A	TUBB2A	TUBB2A	NP_001060-AN2-2-chr6_93_78_93	NP_001060-AN2-2-chr6-3155290-3155858-stop94-whim12
RPRD2		NaN													RPRD2	RPRD2	RPRD2	RPRD2	NP_056018-A-3-5_146_143_151	NP_056018-A-3-5-chr1-150413499-150415706-78-whim12
RND3		1.1455							0.869	1.422					RND3	RND3	RND3	RND3	NP_001241667-AN2-3-chr2_117_116_127	NP_001241667-AN2-3-chr2-151328269-151331388-stop243-whim2
LTBP2		0.082									0.16	0.004			LTBP2	LTBP2	LTBP2	LTBP2	NP_000419-A-16-19_971_966_977	NP_000419-A-16-19-chr14-74976562-74983524-243-whim6
ACAT1		0.8715									0.738	1.005			ACAT1	ACAT1	ACAT1	ACAT1	NP_000010-A-3-5_81_79_92	NP_000010-A-3-5-chr11-108004664-108005868-96-whim12
MYO6_2		0.5755									0.623	0.528			MYO6_2	MYO6	MYO6_2	MYO6_2	NP_004990-A-28-30_1047_1044_1054	NP_004990-A-28-30-chr6-76604977-76617321-39-whim12
PALLD_1		NaN													PALLD_1	PALLD	PALLD_1	PALLD_1	NP_057165-A-10-13_701_690_705	NP_057165-A-10-13-chr4-169812208-169824907-321-whim12
SVIL		0.953					1.137	0.769							SVIL	SVIL	SVIL	SVIL	NP_068506-A-30-32_303_289_304	NP_068506-A-30-32-chr10-29821101-29824917-930-variant-whim12
STRN3		NaN													STRN3	STRN3	STRN3	STRN3	NP_001077362-A-10-12_330_322_333	NP_001077362-A-10-12-chr14-31388312-31404368-111-whim12
TARDBP		NaN													TARDBP	TARDBP	TARDBP	TARDBP	NP_031401-AN1-1-chr1_80_94_105	NP_031401-AN1-1-chr1-11074022-11075580-stop139-whim2
EIF2S3		NaN													EIF2S3	EIF2S3	EIF2S3	EIF2S3	NP_001406-AN1-9-chrX_338_352_378	NP_001406-AN1-9-chrX-24086225-24089677-stop399-whim2
FAM118A		-0.6235											-0.399	-0.848	FAM118A	FAM118A	FAM118A	FAM118A	NP_001098065-AN1-1-chr22_16_85_97	NP_001098065-AN1-1-chr22-45718307-45719052-stop120-whim12
PPP1R1B		0.8345					1.092	0.577							PPP1R1B	PPP1R1B	PPP1R1B	PPP1R1B	NP_115568-A-2-5_48_41_51	NP_115568-A-2-5-chr17-37785483-37790135-99-whim2
HMGA2		0.6595					0.75	0.569							HMGA2	HMGA2	HMGA2	HMGA2	NP_003474-AN1-4-chr12_95_103_115	NP_003474-AN1-4-chr12-66345195-66346135-stop119-whim12
FUBP3		NaN													FUBP3	FUBP3	FUBP3	FUBP3	NP_003925-AN1-2-chr9_64_58_74	NP_003925-AN1-2-chr9-133470975-133485343-stop85-whim12
CC2D1A_1		NaN													CC2D1A_1	CC2D1A	CC2D1A_1	CC2D1A_1	NP_060191-AN1-12-chr19_453_453_463	NP_060191-AN1-12-chr19-14030764-14031372-stop577-whim12
TOM1L1		NaN													TOM1L1	TOM1L1	TOM1L1	TOM1L1	NP_005477-AN1-3-chr17_75_87_94	NP_005477-AN1-3-chr17-52982928-52991120-stop154-whim2
MAOB		-0.078									-0.123	-0.033			MAOB	MAOB	MAOB	MAOB	NP_000889-A-3-5_380_371_392	NP_000889-A-3-5-chrX-43628665-43637928-98-stop428-whim2
NDUFV2		NaN													NDUFV2	NDUFV2	NDUFV2	NDUFV2	NP_066552-AN1-6-chr18_194_199_208	NP_066552-AN1-6-chr18-9124981-9126831-stop225-whim2
SIVA1		-0.712					-0.641	-0.783							SIVA1	SIVA1	SIVA1	SIVA1	NP_006418-AN1-2-chr14_105_120_127	NP_006418-AN1-2-chr14-105222161-105222955-stop155-whim2
RFC3		-0.4305											-0.259	-0.602	RFC3	RFC3	RFC3	RFC3	NP_853536-AN1-4-chr13_132_137_144	NP_853536-AN1-4-chr13-34400023-34403990-stop195-whim2
SEC24C		NaN													SEC24C	SEC24C	SEC24C	SEC24C	NP_004913-AN1-5-chr10_330_320_339	NP_004913-AN1-5-chr10-75520607-75521855-stop367-whim12
NFATC2IP		NaN													NFATC2IP	NFATC2IP	NFATC2IP	NFATC2IP	NP_116204-A-3-5_194_188_197	NP_116204-A-3-5-chr16-28966003-28967471-81-whim12
CCT5_1		NaN													CCT5_1	CCT5	CCT5_1	CCT5_1	NP_036205-AN1-4-chr5_178_211_218	NP_036205-AN1-4-chr5-10256265-10258198-stop264-whim2
WDR37		NaN													WDR37	WDR37	WDR37	WDR37	NP_054742-AN1-8-chr10_243_280_295	NP_054742-AN1-8-chr10-1142186-1149538-stop345-whim12
AGRN		0.3235											0.351	0.296	AGRN	AGRN	AGRN	AGRN	NP_940978-AN1-21-chr1_1212_1202_1213	NP_940978-AN1-21-chr1-983067-983161-stop1332-whim2
TNC_2		0.24									0.137	0.343			TNC_2	TNC	TNC_2	TNC_2	NP_002151-A-11-19_1072_1069_1077	NP_002151-A-11-19-chr9-117804620-117835881-1911-variant-whim6
ABI2		0.7665											0.625	0.908	ABI2	ABI2	ABI2	ABI2	NP_005750-A-4-6_188_184_200	NP_005750-A-4-6-chr2-204255866-204260378-147-whim12
BCAS3		-0.225									0.029	-0.479			BCAS3	BCAS3	BCAS3	BCAS3	NP_001092902-AN1-23-chr17_880_888_895	NP_001092902-AN1-23-chr17-59445855-59465978-stop911-whim2
HINT2		-0.1135							-0.121	-0.106					HINT2	HINT2	HINT2	HINT2	NP_115982-A-2-4_75_63_84	NP_115982-A-2-4-chr9-35813335-35813640-105-whim6
FASN		0.6555									0.432	0.879			FASN	FASN	FASN	FASN	NP_004095-A-5-7_2136_2126_2143	NP_004095-A-5-7-chr17-80038798-80039476-189-whim30
PLOD1		0.401							0.338	0.464					PLOD1	PLOD1	PLOD1	PLOD1	NP_000293-AN1-7-chr1_249_248_257	NP_000293-AN1-7-chr1-12017071-12017904-stop281-whim12
MTDH		0.295									0.385	0.205			MTDH	MTDH	MTDH	MTDH	NP_848927-A-9-11_461_452_463	NP_848927-A-9-11-chr8-98725997-98735106-141-whim12
KAL1		1.1475											1.225	1.07	KAL1	KAL1	KAL1	KAL1	NP_000207-AN2-7-chrX_403_412_419	NP_000207-AN2-7-chrX-8534250-8536272-stop420-whim30
FAM168B		NaN													FAM168B	FAM168B	FAM168B	FAM168B	NP_001009993-A-3-5_24_19_32	NP_001009993-A-3-5-chr2-131813268-131840149-84-whim2
HNRNPA3_1		0.2655											0.289	0.242	HNRNPA3_1	HNRNPA3	HNRNPA3_1	HNRNPA3_1	NP_919223-AN1-6-chr2_248_247_256	NP_919223-AN1-6-chr2-178081499-178081590-stop283-whim2
ATP11A		0.0995					0.073	0.126							ATP11A	ATP11A	ATP11A	ATP11A	NP_115565-AN1-28-chr13_1110_1108_1117	NP_115565-AN1-28-chr13-113530255-113536126-stop1193-whim12
PRRC2B		-0.241							-0.183	-0.299					PRRC2B	PRRC2B	PRRC2B	PRRC2B	NP_037450-AN1-19-chr9_1662_1648_1664	NP_037450-AN1-19-chr9-134357195-134357760-stop1768-whim12
KRT18		NaN													KRT18	KRT18	KRT18	KRT18	NP_000215-AN1-5-chr12_317_315_324	NP_000215-AN1-5-chr12-53345640-53345905-stop393-whim2
ABCD1		0.1955									0.122	0.269			ABCD1	ABCD1	ABCD1	ABCD1	NP_000024-AN1-4-chrX_466_521_535	NP_000024-AN1-4-chrX-153001967-153002065-stop615-whim2
SMCR7L		0.363											0.393	0.333	SMCR7L	SMCR7L	SMCR7L	SMCR7L	NP_061881-AN1-2-chr22_108_125_138	NP_061881-AN1-2-chr22-39908031-39908322-stop149-whim12
C1orf112		-0.2395											-0.143	-0.336	C1orf112	C1orf112	C1orf112	C1orf112	NP_060656-AN1-20-chr1_749_772_787	NP_060656-AN1-20-chr1-169819486-169820945-stop823-whim6
LSM14A		0.317					0.63	0.004							LSM14A	LSM14A	LSM14A	LSM14A	NP_056393-A-4-6_180_175_184	NP_056393-A-4-6-chr19-34699956-34706500-177-whim12
TULP4		-0.1485					-0.222	-0.075							TULP4	TULP4	TULP4	TULP4	NP_001007467-AN1-12-chr6_673_1436_1444	NP_001007467-AN1-12-chr6-158919844-158922715-stop1553-whim30
SH3GLB2		-0.3475							-0.398	-0.297					SH3GLB2	SH3GLB2	SH3GLB2	SH3GLB2	NP_064530-A-4-6_209_199_214	NP_064530-A-4-6-chr9-131772488-131774514-24-whim12
EHMT1		NaN													EHMT1	EHMT1	EHMT1	EHMT1	NP_079033-AN1-4-chr9_276_272_279	NP_079033-AN1-4-chr9-140622981-140637846-stop342-whim2
NUP214		0.2135					0.211	0.216							NUP214	NUP214	NUP214	NUP214	NP_005076-AN1-13-chr9_649_641_651	NP_005076-AN1-13-chr9-134021691-134022873-stop736-whim12
RFC3_1		NaN													RFC3_1	RFC3	RFC3_1	RFC3_1	NP_853536-AN1-8-chr13_293_278_293	NP_853536-AN1-8-chr13-34409354-34516389-stop294-whim2
CALR		NaN													CALR	CALR	CALR	CALR	NP_004334-A-2-4_66_65_74	NP_004334-A-2-4-chr19-13050049-13050866-204-whim12
PRRC2B_1		2.163											2.071	2.255	PRRC2B_1	PRRC2B	PRRC2B_1	PRRC2B_1	NP_037450-AN1-9-chr9_404_511_522	NP_037450-AN1-9-chr9-134330553-134334556-stop535-whim12
MICAL2		-0.2155							-0.241	-0.19					MICAL2	MICAL2	MICAL2	MICAL2	NP_055447-A-20-22_950_945_953	NP_055447-A-20-22-chr11-12270793-12278331-108-whim12
SORBS2		-0.059									-0.123	0.005			SORBS2	SORBS2	SORBS2	SORBS2	NP_003594-A-10-12_303_293_312	NP_003594-A-10-12-chr4-186551752-186559232-57-whim2
SPTBN1		NaN													SPTBN1	SPTBN1	SPTBN1	SPTBN1	NP_003119-AN1-31-chr2_2140_2124_2140	NP_003119-AN1-31-chr2-54887136-54889467-stop2141-whim30
CNST		NaN													CNST	CNST	CNST	CNST	NP_001132931-A-1-3_127_130_137	NP_001132931-A-1-3-chr1-246755243-246795195-206-stop138-whim12
PLEKHG3		0.2725											0.477	0.068	PLEKHG3	PLEKHG3	PLEKHG3	PLEKHG3	NP_056364-AN1-9-chr14_395_402_409	NP_056364-AN1-9-chr14-65199619-65203002-stop442-whim2
SLTM		NaN													SLTM	SLTM	SLTM	SLTM	NP_079031-A-16-19_107_106_114	NP_079031-A-16-19-chr15-59193486-59209133-246-whim12
CAD		-0.0765											-0.145	-0.008	CAD	CAD	CAD	CAD	NP_004332-AN1-35-chr2_1866_1858_1876	NP_004332-AN1-35-chr2-27463229-27463434-stop1898-whim12
ATXN2L_2		NaN													ATXN2L_2	ATXN2L	ATXN2L_2	ATXN2L_2	NP_680781-AN1-18-chr16_812_937_948	NP_680781-AN1-18-chr16-28846014-28846402-stop1045-whim2
KIF20A		NaN													KIF20A	KIF20A	KIF20A	KIF20A	NP_005724-AN1-12-chr5_562_581_588	NP_005724-AN1-12-chr5-137520365-137520498-stop608-whim2
SNRPD3		-0.0515					-0.066	-0.037							SNRPD3	SNRPD3	SNRPD3	SNRPD3	NP_004166-AN1-1-chr22_43_76_84	NP_004166-AN1-1-chr22-24953768-24963933-stop136-whim2
MPDZ		0.09											0.101	0.079	MPDZ	MPDZ	MPDZ	MPDZ	NP_001248335-A-20-22_1211_1208_1221	NP_001248335-A-20-22-chr9-13140148-13150509-111-variant-whim6
DDX1		0.3495									0.275	0.424			DDX1	DDX1	DDX1	DDX1	NP_004930-AN1-16-chr2_403_408_418	NP_004930-AN1-16-chr2-15758394-15760373-stop453-whim4
ACBD4		NaN													ACBD4	ACBD4	ACBD4	ACBD4	NP_001129176-AN1-6-chr17_204_259_270	NP_001129176-AN1-6-chr17-43215197-43215258-stop326-whim2
NPM1		-0.0705									-0.125	-0.016			NPM1	NPM1	NPM1	NPM1	NP_002511-AN1-9-chr5_258_258_266	NP_002511-AN1-9-chr5-170832407-170834132-stop276-whim12
PTMA		-0.057					-0.249	0.135							PTMA	PTMA	PTMA	PTMA	NP_001092755-AN1-4-chr2_98_90_98	NP_001092755-AN1-4-chr2-232577226-232577552-stop99-whim12
MFI2		0.5065											0.632	0.381	MFI2	MFI2	MFI2	MFI2	NP_005920-AN2-3-chr3_647_668_679	NP_005920-AN2-3-chr3-196731042-196733419-stop763-whim30
KIAA0922		-0.7805							-0.769	-0.792					KIAA0922	KIAA0922	KIAA0922	KIAA0922	NP_001124479-AN1-24-chr4_930_989_1004	NP_001124479-AN1-24-chr4-154524604-154524956-stop1141-whim12
PFKP		-0.1925							-0.287	-0.098					PFKP	PFKP	PFKP	PFKP	NP_002618-AN1-3-chr10_89_90_110	NP_002618-AN1-3-chr10-3141544-3143640-stop128-whim12
SMARCA2		0.4545											0.487	0.422	SMARCA2	SMARCA2	SMARCA2	SMARCA2	NP_620614-AN1-3-chr9_264_274_288	NP_620614-AN1-3-chr9-2039900-2041330-stop289-whim12
IKBKB		0.058									-0.011	0.127			IKBKB	IKBKB	IKBKB	IKBKB	NP_001547-AN1-16-chr8_580_602_612	NP_001547-AN1-16-chr8-42179463-42179544-stop623-whim12
USP9X_1		0.6525							0.717	0.588					USP9X_1	USP9X	USP9X_1	USP9X_1	NP_001034679-AN1-20-chrX_1051_1056_1063	NP_001034679-AN1-20-chrX-41031211-41043788-stop1103-whim6
MTMR9		NaN													MTMR9	MTMR9	MTMR9	MTMR9	NP_056273-AN1-3-chr8_140_156_164	NP_056273-AN1-3-chr8-11157657-11162382-stop224-whim6
OPA1		NaN													OPA1	OPA1	OPA1	OPA1	NP_570850-AN1-8-chr3_282_270_283	NP_570850-AN1-8-chr3-193349454-193350253-stop310-whim30
TTYH1		0.583					0.479	0.687							TTYH1	TTYH1	TTYH1	TTYH1	NP_001005367-AN1-3-chr19_140_163_170	NP_001005367-AN1-3-chr19-54932562-54933372-stop270-whim2
SLC25A14		NaN													SLC25A14	SLC25A14	SLC25A14	SLC25A14	NP_003942-AN1-7-chrX_241_266_275	NP_003942-AN1-7-chrX-129498726-129499520-stop288-whim12
NFYC		NaN													NFYC	NFYC	NFYC	NFYC	NP_001136060-AN1-9-chr1_316_324_334	NP_001136060-AN1-9-chr1-41235087-41236068-stop459-whim12
PTBP1		1.464									0.883	2.045			PTBP1	PTBP1	PTBP1	PTBP1	NP_002810-AN1-7-chr19_240_239_246	NP_002810-AN1-7-chr19-804939-805072-stop369-whim2
ANK2		0.72					0.861	0.579							ANK2	ANK2	ANK2	ANK2	NP_001139-AN1-45-chr4_3954_3984_3991	NP_001139-AN1-45-chr4-114294605-114295919-stop4016-whim12
PIDD		0.007					-0.047	0.061							PIDD	PIDD	PIDD	PIDD	NP_665893-AN2-15-chr11_100_170_181	NP_665893-AN2-15-chr11-803648-804093-stop182-whim12
UHRF2		NaN													UHRF2	UHRF2	UHRF2	UHRF2	NP_690856-AN1-10-chr9_536_521_536	NP_690856-AN1-10-chr9-6493932-6496959-stop542-whim2
FBXO9		0.098					0.115	0.081							FBXO9	FBXO9	FBXO9	FBXO9	NP_036479-AN1-3-chr6_114_126_136	NP_036479-AN1-3-chr6-52941341-52943578-stop152-whim30
TMSB10		-0.1605							-0.234	-0.087					TMSB10	TMSB10	TMSB10	TMSB10	NP_066926-AN1-1-chr2_35_54_68	NP_066926-AN1-1-chr2-85133241-85133489-stop69-whim12
SH3KBP1		0.5985							0.544	0.653					SH3KBP1	SH3KBP1	SH3KBP1	SH3KBP1	NP_114098-A-3-5_499_490_503	NP_114098-A-3-5-chrX-19560311-19568091-129-whim12
TMPO_1		NaN													TMPO_1	TMPO	TMPO_1	TMPO_1	NP_001027454-A-4-6_222_217_229	NP_001027454-A-4-6-chr12-98931350-98938219-120-whim2
STRADB		NaN													STRADB	STRADB	STRADB	STRADB	NP_061041-AN1-8-chr2_276_279_296	NP_061041-AN1-8-chr2-202342914-202343091-stop385-whim2
PRPH		0.243					0.405	0.081							PRPH	PRPH	PRPH	PRPH	NP_006253-AN1-3-chr12_238_258_268	NP_006253-AN1-3-chr12-49690310-49691232-stop296-whim6
CGNL1		0.289					0.181	0.397							CGNL1	CGNL1	CGNL1	CGNL1	NP_001239264-AN1-7-chr15_802_794_807	NP_001239264-AN1-7-chr15-57754090-57770562-stop855-whim12
DNAJA1		0.1795							0.11	0.249					DNAJA1	DNAJA1	DNAJA1	DNAJA1	NP_001530-AN1-1-chr9_45_45_56	NP_001530-AN1-1-chr9-33026614-33026819-stop102-whim2
AHR		-1.0135											-0.81	-1.217	AHR	AHR	AHR	AHR	NP_001612-AN1-9-chr7_388_507_524	NP_001612-AN1-9-chr7-17375410-17378810-stop742-whim30
GNL3		-0.2925							-0.112	-0.473					GNL3	GNL3	GNL3	GNL3	NP_055181-AN1-8-chr3_261_274_282	NP_055181-AN1-8-chr3-52725087-52726850-stop367-whim30
NDFIP2		NaN													NDFIP2	NDFIP2	NDFIP2	NDFIP2	NP_001154879-AN1-2-chr13_163_192_205	NP_001154879-AN1-2-chr13-80095110-80107463-stop216-whim12
RBMX		NaN													RBMX	RBMX	RBMX	RBMX	NP_001158275-AN2-3-chrX_153_173_180	NP_001158275-AN2-3-chrX-135957322-135957416-stop181-whim2
SPDL1		NaN													SPDL1	SPDL1	SPDL1	SPDL1	NP_060255-AN1-6-chr5_298_311_318	NP_060255-AN1-6-chr5-169021685-169023588-stop340-whim12
IQSEC1		0.442											0.533	0.351	IQSEC1	IQSEC1	IQSEC1	IQSEC1	NP_001127854-A-2-4_920_914_922	NP_001127854-A-2-4-chr3-12943022-12949848-50-stop923-whim12
TINAGL1		0.6185									0.544	0.693			TINAGL1	TINAGL1	TINAGL1	TINAGL1	NP_071447-AN1-2-chr1_125_184_210	NP_071447-AN1-2-chr1-32044868-32045888-stop275-whim2
MIB2		0.851					1.019	0.683							MIB2	MIB2	MIB2	MIB2	NP_543151-AN1-16-chr1_850_951_959	NP_543151-AN1-16-chr1-1564102-1564413-stop979-whim2
TMCO6		NaN													TMCO6	TMCO6	TMCO6	TMCO6	NP_060972-AN1-3-chr5_105_93_105	NP_060972-AN1-3-chr5-140021365-140022075-stop106-whim12
RORA		1.082							0.973	1.191					RORA	RORA	RORA	RORA	NP_599022-AN2-3-chr15_465_507_520	NP_599022-AN2-3-chr15-60792351-60793157-stop525-whim2
DDO		-0.2675							-0.209	-0.326					DDO	DDO	DDO	DDO	NP_004023-AN2-2-chr6_124_167_178	NP_004023-AN2-2-chr6-110726147-110729536-stop232-whim30
GAPDH_2		0.2635											0.305	0.222	GAPDH_2	GAPDH	GAPDH_2	GAPDH_2	NP_002037-AN1-6-chr12_176_146_182	NP_002037-AN1-6-chr12-6646556-6647087-stop183-whim12
C19orf55		NaN													C19orf55	C19orf55	C19orf55	C19orf55	NP_001034976-AN1-8-chr19_320_549_557	NP_001034976-AN1-8-chr19-36257856-36257951-stop677-whim30
ARPC4-TTLL3		NaN													ARPC4-TTLL3	ARPC4	ARPC4-TTLL3	ARPC4-TTLL3	NP_001185722-AN1-4-chr3_111_116_129	NP_001185722-AN1-4-chr3-9843440-9845571-stop158-whim2
USP54		0.1445					0.111	0.178							USP54	USP54	USP54	USP54	NP_689799-A-2-4_1391_1388_1396	NP_689799-A-2-4-chr10-75260596-75265065-141-variant-whim21
CCDC176		0.1325					0.25	0.015							CCDC176	CCDC176	CCDC176	CCDC176	NP_079333-A-6-8_217_210_217	NP_079333-A-6-8-chr14-74512833-74516404-145-stop244-whim12
PLS3		NaN													PLS3	PLS3	PLS3	PLS3	NP_005023-AN1-1-chrX_26_24_31	NP_005023-AN1-1-chrX-114844635-114845114-stop32-whim12
MTDH_1		NaN													MTDH_1	MTDH	MTDH_1	MTDH_1	NP_848927-AN1-6-chr8_350_344_357	NP_848927-AN1-6-chr8-98703416-98708431-stop382-whim12
LGALS1_1		0.591									0.63	0.552			LGALS1_1	LGALS1	LGALS1_1	LGALS1_1	NP_002296-AN1-2-chr22_30_22_30	NP_002296-AN1-2-chr22-38073072-38074512-stop90-whim12
EIF4A2		NaN													EIF4A2	EIF4A2	EIF4A2	EIF4A2	NP_001958-AN1-4-chr3_117_160_167	NP_001958-AN1-4-chr3-186502890-186503680-stop181-whim2
CTTN		-0.378					-1.051	0.295							CTTN	CTTN	CTTN	CTTN	NP_001171669-A-7-9_227_222_230	NP_001171669-A-7-9-chr11-70265962-70269045-111-variant-whim4
PPRC1		-0.0635					-0.062	-0.065							PPRC1	PPRC1	PPRC1	PPRC1	NP_055877-AN1-7-chr10_1204_1220_1227	NP_055877-AN1-7-chr10-103904064-103906870-stop1300-whim6
CAPN7		-0.489					-0.517	-0.461							CAPN7	CAPN7	CAPN7	CAPN7	NP_055111-AN1-12-chr3_470_471_479	NP_055111-AN1-12-chr3-15276652-15277772-stop504-whim2
TCP1		NaN													TCP1	TCP1	TCP1	TCP1	NP_110379-A-2-4_366_356_366	NP_110379-A-2-4-chr6-160200822-160201474-193-stop388-whim2
FUBP3_1		-0.355									-0.578	-0.132			FUBP3_1	FUBP3	FUBP3_1	FUBP3_1	NP_003925-A-15-18_478_514_528	NP_003925-A-15-18-chr9-133507409-133511385-149-stop567-whim2
CPSF3L		-0.4795					-0.026	-0.933							CPSF3L	CPSF3L	CPSF3L	CPSF3L	NP_001243385-AN2-11-chr1_241_241_248	NP_001243385-AN2-11-chr1-1250000-1250203-stop286-whim2
TTC13		NaN													TTC13	TTC13	TTC13	TTC13	NP_078801-A-17-19_194_191_200	NP_078801-A-17-19-chr1-231076302-231081134-93-variant-whim21
BCL2L12		-0.947									-0.566	-1.328			BCL2L12	BCL2L12	BCL2L12	BCL2L12	NP_619580-AN1-5-chr19_229_247_254	NP_619580-AN1-5-chr19-50172372-50173502-stop335-whim30
PLEKHH2		NaN													PLEKHH2	PLEKHH2	PLEKHH2	PLEKHH2	NP_742066-AN1-2-chr2_63_77_89	NP_742066-AN1-2-chr2-43906064-43906655-stop90-whim2
TROAP		NaN													TROAP	TROAP	TROAP	TROAP	NP_005471-AN1-11-chr12_434_533_546	NP_005471-AN1-11-chr12-49723774-49724245-stop627-whim4
OGFRL1		NaN													OGFRL1	OGFRL1	OGFRL1	OGFRL1	NP_078852-AN1-2-chr6_108_104_111	NP_078852-AN1-2-chr6-72003082-72003232-stop139-whim12
BCAS3_1		0.2765									0.281	0.272			BCAS3_1	BCAS3	BCAS3_1	BCAS3_1	NP_001092902-AN1-23-chr17_880_873_888	NP_001092902-AN1-23-chr17-59445855-59457866-stop904-whim12
NDUFV3		NaN													NDUFV3	NDUFV3	NDUFV3	NDUFV3	NP_066553-AN1-3-chr21_422_430_437	NP_066553-AN1-3-chr21-44324386-44326949-stop453-whim21
SEC31B		NaN													SEC31B	SEC31B	SEC31B	SEC31B	NP_056305-A-16-21_214_207_217	NP_056305-A-16-21-chr10-102262241-102267664-540-variant-whim4
CCDC150		0.8865							1.09	0.683					CCDC150	CCDC150	CCDC150	CCDC150	NP_001074008-A-5-10_216_213_223	NP_001074008-A-5-10-chr2-197523584-197538964-384-variant-whim2
ALPL		-0.264									-0.356	-0.172			ALPL	ALPL	ALPL	ALPL	NP_000469-AN1-2-chr1_61_69_80	NP_000469-AN1-2-chr1-21887238-21887607-stop103-whim2
NOXA1		0.2915					0.181	0.402							NOXA1	NOXA1	NOXA1	NOXA1	NP_001242997-AN1-4-chr9_169_217_226	NP_001242997-AN1-4-chr9-140323468-140323655-stop289-whim2
USP48		-0.505					-0.329	-0.681							USP48	USP48	USP48	USP48	NP_115612-AN2-9-chr1_796_795_804	NP_115612-AN2-9-chr1-22030881-22032219-stop805-whim12
MTRF1L		-0.0655					0.243	-0.374							MTRF1L	MTRF1L	MTRF1L	MTRF1L	NP_001107656-AN2-5-chr6_114_106_116	NP_001107656-AN2-5-chr6-153319286-153319684-stop117-whim12
SEMA4A		2.1065							1.558	2.655					SEMA4A	SEMA4A	SEMA4A	SEMA4A	NP_071762-A-9-11_379_364_382	NP_071762-A-9-11-chr1-156132885-156144612-181-stop388-whim30
LAP3		NaN													LAP3	LAP3	LAP3	LAP3	NP_056991-A-8-10_330_322_330	NP_056991-A-8-10-chr4-17597157-17600078-89-stop331-whim2
GDI1		0.0585							0.132	-0.015					GDI1	GDI1	GDI1	GDI1	NP_001484-AN1-7-chrX_274_288_299	NP_001484-AN1-7-chrX-153669542-153669942-stop372-whim30
RAB11FIP3		NaN													RAB11FIP3	RAB11FIP3	RAB11FIP3	RAB11FIP3	NP_055515-AN1-6-chr16_435_455_463	NP_055515-AN1-6-chr16-546859-555540-stop503-whim12
ZC2HC1A		0.34									0.114	0.566			ZC2HC1A	ZC2HC1A	ZC2HC1A	ZC2HC1A	NP_057094-AN1-7-chr8_236_266_274	NP_057094-AN1-7-chr8-79610748-79624224-stop275-whim12
EIF3C		NaN													EIF3C	EIF3C	EIF3C	EIF3C	NP_003743-AN1-7-chr16_260_264_271	NP_003743-AN1-7-chr16-28726755-28734472-stop327-whim30
ANKRD28		NaN													ANKRD28	ANKRD28	ANKRD28	ANKRD28	NP_056014-AN2-24-chr3_155_173_187	NP_056014-AN2-24-chr3-15777003-15778539-stop188-whim2
MSH6		0.3235					0.416	0.231							MSH6	MSH6	MSH6	MSH6	NP_000170-AN1-3-chr2_210_522_536	NP_000170-AN1-3-chr2-48023202-48026976-stop656-whim2
PTMS		0.1555							0.095	0.216					PTMS	PTMS	PTMS	PTMS	NP_002815-AN1-2-chr12_40_51_65	NP_002815-AN1-2-chr12-6878840-6879009-stop129-whim12
PLA2G4C		-0.099					0.108	-0.306							PLA2G4C	PLA2G4C	PLA2G4C	PLA2G4C	NP_001152794-AN2-5-chr19_379_382_392	NP_001152794-AN2-5-chr19-48565452-48571047-stop450-whim30
CLCN7		-0.0055											-0.046	0.035	CLCN7	CLCN7	CLCN7	CLCN7	NP_001278-AN2-21-chr16_162_181_196	NP_001278-AN2-21-chr16-1510556-1510816-stop373-whim4
HNRNPA2B1_2		0.0535									0.026	0.081			HNRNPA2B1_2	HNRNPA2B1	HNRNPA2B1_2	HNRNPA2B1_2	NP_112533-A-4-6_205_201_211	NP_112533-A-4-6-chr7-26235529-26236176-81-whim12
ASUN		-0.387							-0.395	-0.379					ASUN	ASUN	ASUN	ASUN	NP_060634-A-5-7_417_415_426	NP_060634-A-5-7-chr12-27067061-27068934-171-whim12
ANO1		NaN													ANO1	ANO1	ANO1	ANO1	NP_060513-AN1-6-chr11_268_264_272	NP_060513-AN1-6-chr11-69954510-69957231-stop329-whim2
TFCP2L1		NaN													TFCP2L1	TFCP2L1	TFCP2L1	TFCP2L1	NP_055368-A-9-11_169_163_170	NP_055368-A-9-11-chr2-122000045-122005739-153-whim2
TAF3		NaN													TAF3	TAF3	TAF3	TAF3	NP_114129-AN1-2-chr10_141_823_833	NP_114129-AN1-2-chr10-7866523-8005885-stop849-whim2
NDRG2		0.939									0.287	1.591			NDRG2	NDRG2	NDRG2	NDRG2	NP_963293-AN2-8-chr14_206_186_215	NP_963293-AN2-8-chr14-21487898-21488078-stop371-whim2
SSFA2_1		1.0065											1.102	0.911	SSFA2_1	SSFA2	SSFA2_1	SSFA2_1	NP_001123917-AN1-7-chr2_238_415_423	NP_001123917-AN1-7-chr2-182765631-182766558-stop486-whim12
SMARCC1		-0.2545							-0.225	-0.284					SMARCC1	SMARCC1	SMARCC1	SMARCC1	NP_003065-A-8-10_634_616_634	NP_003065-A-8-10-chr3-47702945-47712147-259-stop738-whim2
SEC31A_2		-0.504									-0.07	-0.938			SEC31A_2	SEC31A	SEC31A_2	SEC31A_2	NP_001070675-AN2-4-chr4_1098_1104_1111	NP_001070675-AN2-4-chr4-83745819-83748521-stop1112-whim2
ACTR3		-0.3935					-0.291	-0.496							ACTR3	ACTR3	ACTR3	ACTR3	NP_005712-AN1-2-chr2_33_19_33	NP_005712-AN1-2-chr2-114670804-114674474-stop34-whim2
C6orf70		-0.507									-0.353	-0.661			C6orf70	C6orf70	C6orf70	C6orf70	NP_001265460-AN1-16-chr6_533_544_563	NP_001265460-AN1-16-chr6-170176507-170176610-stop617-whim2
TNC_3		0.421					0.245	0.597							TNC_3	TNC	TNC_3	TNC_3	NP_002151-A-17-19_1072_1069_1091	NP_002151-A-17-19-chr9-117826347-117835881-273-variant-whim30
NRF1		0.294					0.208	0.38							NRF1	NRF1	NRF1	NRF1	NP_005002-AN1-9-chr7_450_473_481	NP_005002-AN1-9-chr7-129367205-129374882-stop482-whim2
DECR2		-0.9945					-1.013	-0.976							DECR2	DECR2	DECR2	DECR2	NP_065715-AN1-4-chr16_114_141_148	NP_065715-AN1-4-chr16-457560-460208-stop161-whim2
USP54_1		NaN													USP54_1	USP54	USP54_1	USP54_1	NP_689799-A-6-8_788_778_789	NP_689799-A-6-8-chr10-75279750-75283340-120-variant-whim21
ARFIP2		-1.708									-1.836	-1.58			ARFIP2	ARFIP2	ARFIP2	ARFIP2	NP_001229785-AN2-5-chr11_21_31_38	NP_001229785-AN2-5-chr11-6500464-6501201-stop53-whim2
RPS17L		-0.1545									-0.214	-0.095			RPS17L	RPS17L	RPS17L	RPS17L	NP_001185986-AN2-3-chr15_88_82_101	NP_001185986-AN2-3-chr15-83207116-83207630-stop134-whim2
CERS2		0.296									-0.091	0.683			CERS2	CERS2	CERS2	CERS2	NP_071358-A-3-6_175_166_184	NP_071358-A-3-6-chr1-150939338-150940139-222-whim30
MYOF		NaN													MYOF	MYOF	MYOF	MYOF	NP_038479-A-41-46_282_273_289	NP_038479-A-41-46-chr10-95157213-95163779-378-whim12
DLG4		1.0195									0.803	1.236			DLG4	DLG4	DLG4	DLG4	NP_001356-A-13-15_213_209_222	NP_001356-A-13-15-chr17-7106366-7106742-137-stop223-whim30
MTRR		NaN													MTRR	MTRR	MTRR	MTRR	NP_076915-AN1-11-chr5_548_576_583	NP_076915-AN1-11-chr5-7893026-7893619-stop586-whim12
TAF4		0.47							0.383	0.557					TAF4	TAF4	TAF4	TAF4	NP_003176-AN2-11-chr20_629_622_639	NP_003176-AN2-11-chr20-60582680-60584107-stop1082-whim2
NCOR2_1		NaN													NCOR2_1	NCOR2	NCOR2_1	NCOR2_1	NP_006303-A-29-31_674_865_879	NP_006303-A-29-31-chr12-124859009-124870290-148-stop914-whim2
NF1		-0.0585					-0.098	-0.019							NF1	NF1	NF1	NF1	NP_001035957-AN1-36-chr17_1613_1601_1618	NP_001035957-AN1-36-chr17-29592357-29624008-stop1636-whim30
ETFB		0.925							0.526	1.324					ETFB	ETFB	ETFB	ETFB	NP_001014763-AN2-4-chr19_217_216_232	NP_001014763-AN2-4-chr19-51853668-51856385-stop236-whim12
PSMD14		NaN													PSMD14	PSMD14	PSMD14	PSMD14	NP_005796-AN1-5-chr2_155_169_184	NP_005796-AN1-5-chr2-162227833-162228506-stop212-whim12
HR		NaN													HR	HR	HR	HR	NP_005135-AN2-12-chr8_708_725_733	NP_005135-AN2-12-chr8-21979205-21980005-stop740-whim2
NAA50		NaN													NAA50	NAA50	NAA50	NAA50	NP_079422-AN2-3-chr3_90_95_108	NP_079422-AN2-3-chr3-113440775-113442268-stop117-whim2
ANKLE2		-0.0755					-0.11	-0.041							ANKLE2	ANKLE2	ANKLE2	ANKLE2	NP_055929-AN2-4-chr12_632_1024_1032	NP_055929-AN2-4-chr12-133310386-133310970-stop1239-whim2
DDX19B		NaN													DDX19B	DDX19B	DDX19B	DDX19B	NP_009173-AN1-8-chr16_263_304_313	NP_009173-AN1-8-chr16-70363372-70363718-stop352-whim2
MIA		-2.4285					-2.56	-2.297							MIA	MIA	MIA	MIA	NP_006524-AN1-2-chr19_88_108_116	NP_006524-AN1-2-chr19-41281790-41282879-stop173-whim30
CCT5_2		-0.15							-0.115	-0.185					CCT5_2	CCT5	CCT5_2	CCT5_2	NP_036205-AN1-7-chr5_332_342_349	NP_036205-AN1-7-chr5-10261023-10261758-stop367-whim2
B4GALNT3		NaN													B4GALNT3	B4GALNT3	B4GALNT3	B4GALNT3	NP_775864-AN1-13-chr12_424_560_574	NP_775864-AN1-13-chr12-661694-662356-stop715-whim2
PKP4		NaN													PKP4	PKP4	PKP4	PKP4	NP_001005476-AN1-7-chr2_448_445_454	NP_001005476-AN1-7-chr2-159488453-159490584-stop526-whim12
RFC5		NaN													RFC5	RFC5	RFC5	RFC5	NP_031396-A-5-10_142_141_148	NP_031396-A-5-10-chr12-118460164-118467575-450-whim2
KIF4A		0.9535							0.769	1.138					KIF4A	KIF4A	KIF4A	KIF4A	NP_036442-AN1-22-chrX_874_924_942	NP_036442-AN1-22-chrX-69622545-69623734-stop947-whim2
DGKZ		NaN													DGKZ	DGKZ	DGKZ	DGKZ	NP_001099010-A-11-14_526_524_540	NP_001099010-A-11-14-chr11-46394060-46394510-175-stop624-whim2
NDOR1		1.1205									0.721	1.52			NDOR1	NDOR1	NDOR1	NDOR1	NP_001137498-AN1-6-chr9_241_256_272	NP_001137498-AN1-6-chr9-140108865-140109207-stop297-whim30
CNOT11		-0.1765					-0.269	-0.084							CNOT11	CNOT11	CNOT11	CNOT11	NP_060016-AN1-3-chr2_278_315_322	NP_060016-AN1-3-chr2-101879153-101881321-stop344-whim2
NBEAL1		0.0605					0.096	0.025							NBEAL1	NBEAL1	NBEAL1	NBEAL1	NP_001107604-AN1-7-chr2_229_298_310	NP_001107604-AN1-7-chr2-203942560-203947911-stop352-whim2
UBE2I		NaN													UBE2I	UBE2I	UBE2I	UBE2I	NP_003336-AN1-3-chr16_74_62_74	NP_003336-AN1-3-chr16-1365727-1369702-stop75-whim12
FAF2		0.287									0.255	0.319			FAF2	FAF2	FAF2	FAF2	NP_055428-AN1-8-chr5_281_317_326	NP_055428-AN1-8-chr5-175923664-175925923-stop350-whim2
XDH		NaN													XDH	XDH	XDH	XDH	NP_000370-AN2-27-chr2_297_327_334	NP_000370-AN2-27-chr2-31606179-31606620-stop335-whim2
MYO18A		-0.201					-0.383	-0.019							MYO18A	MYO18A	MYO18A	MYO18A	NP_510880-A-21-41_334_329_337	NP_510880-A-21-41-chr17-27426780-27492959-2508-whim2
LYST		-0.1755							-0.115	-0.236					LYST	LYST	LYST	LYST	NP_000072-A-29-32_2085_2064_2087	NP_000072-A-29-32-chr1-235918947-235926019-806-stop2092-whim2
CHD2		-0.198											-0.185	-0.211	CHD2	CHD2	CHD2	CHD2	NP_001262-AN1-2-chr15_99_98_107	NP_001262-AN1-2-chr15-93467782-93470531-stop1810-whim2
GAB1		0.9565											1.096	0.817	GAB1	GAB1	GAB1	GAB1	NP_002030-A-2-4_123_136_146	NP_002030-A-2-4-chr4-144336924-144359151-226-stop157-whim30
RNMT		0.829									0.286	1.372			RNMT	RNMT	RNMT	RNMT	NP_003790-AN1-9-chr18_465_482_489	NP_003790-AN1-9-chr18-13754146-13757212-stop513-whim2
WWC2		0.6505					0.695	0.606							WWC2	WWC2	WWC2	WWC2	NP_079225-AN1-15-chr4_801_797_805	NP_079225-AN1-15-chr4-184190316-184190914-stop816-whim30
PIKFYVE		NaN													PIKFYVE	PIKFYVE	PIKFYVE	PIKFYVE	NP_055855-AN1-34-chr2_1793_1801_1809	NP_055855-AN1-34-chr2-209212747-209215503-stop1849-whim2
AIG1		NaN													AIG1	AIG1	AIG1	AIG1	NP_057192-AN1-5-chr6_227_232_239	NP_057192-AN1-5-chr6-143654582-143656187-stop240-whim12
SLMO1		NaN													SLMO1	SLMO1	SLMO1	SLMO1	NP_006544-AN1-4-chr18_122_134_145	NP_006544-AN1-4-chr18-12427110-12427183-stop177-whim2
SDK1		-0.91											-0.608	-1.212	SDK1	SDK1	SDK1	SDK1	NP_689957-AN1-38-chr7_1847_1856_1865	NP_689957-AN1-38-chr7-4249794-4250126-stop1887-whim30
CCDC150_1		0.6715									0.176	1.167			CCDC150_1	CCDC150	CCDC150_1	CCDC150_1	NP_001074008-A-22-26_853_849_862	NP_001074008-A-22-26-chr2-197590823-197595582-426-variant-whim2
KIF14		0.5565					0.784	0.329							KIF14	KIF14	KIF14	KIF14	NP_055690-A-9-11_1113_1113_1120	NP_055690-A-9-11-chr1-200544819-200550328-130-stop1150-whim30
THUMPD2		NaN													THUMPD2	THUMPD2	THUMPD2	THUMPD2	NP_079540-AN2-3-chr2_360_373_385	NP_079540-AN2-3-chr2-39978331-39982434-stop391-whim2
GYLTL1B		0.3635									0.693	0.034			GYLTL1B	GYLTL1B	GYLTL1B	GYLTL1B	NP_689525-AN1-12-chr11_651_641_654	NP_689525-AN1-12-chr11-45949923-45950266-stop655-whim2
S100PBP		NaN													S100PBP	S100PBP	S100PBP	S100PBP	NP_073590-AN1-1-chr1_278_297_304	NP_073590-AN1-1-chr1-33292531-33293596-stop308-whim12
CAPN2		1.0455											1.06	1.031	CAPN2	CAPN2	CAPN2	CAPN2	NP_001139540-A-9-11_301_346_355	NP_001139540-A-9-11-chr1-223940658-223945070-170-stop369-whim2
LOXL2		0.522					0.811	0.233							LOXL2	LOXL2	LOXL2	LOXL2	NP_002309-AN2-10-chr8_323_374_381	NP_002309-AN2-10-chr8-23186100-23190913-stop406-whim12
KIFC3		-0.539					-0.287	-0.791							KIFC3	KIFC3	KIFC3	KIFC3	NP_005541-A-16-18_60_55_66	NP_005541-A-16-18-chr16-57806200-57831983-143-stop67-whim30
SRCIN1		0.6645					0.469	0.86							SRCIN1	SRCIN1	SRCIN1	SRCIN1	NP_079524-AN2-2-chr17_1140_1230_1254	NP_079524-AN2-2-chr17-36699942-36700057-stop1268-whim2
PSMD11		1.1945											1.438	0.951	PSMD11	PSMD11	PSMD11	PSMD11	NP_001257411-A-8-11_284_283_292	NP_001257411-A-8-11-chr17-30801842-30806868-189-whim12
KIF1B_1		NaN													KIF1B_1	KIF1B	KIF1B_1	KIF1B_1	NP_055889-A-43-45_1653_1635_1653	NP_055889-A-43-45-chr1-10434523-10435312-193-stop1677-whim2
NKD2		-1.167							-1.349	-0.985					NKD2	NKD2	NKD2	NKD2	NP_149111-AN1-8-chr5_223_451_458	NP_149111-AN1-8-chr5-1035588-1036224-stop579-whim2
BOC		-0.1895									-0.411	0.032			BOC	BOC	BOC	BOC	NP_150279-AN1-9-chr3_605_662_671	NP_150279-AN1-9-chr3-112997630-112998101-stop724-whim2
COL6A1		-0.0205					0.028	-0.069							COL6A1	COL6A1	COL6A1	COL6A1	NP_001839-AN1-19-chr21_446_443_452	NP_001839-AN1-19-chr21-47412724-47413674-stop454-whim30
TMEM259		0.2445											0.166	0.323	TMEM259	TMEM259	TMEM259	TMEM259	NP_001028198-AN2-10-chr19_170_188_197	NP_001028198-AN2-10-chr19-1013399-1014190-stop641-whim12
WDR5		0.0395					-0.056	0.135							WDR5	WDR5	WDR5	WDR5	NP_060058-AN1-12-chr9_302_297_314	NP_060058-AN1-12-chr9-137021715-137021952-stop315-whim2
VWA9		0.289											0.297	0.281	VWA9	VWA9	VWA9	VWA9	NP_001193987-AN2-7-chr15_233_229_243	NP_001193987-AN2-7-chr15-65889933-65890658-stop244-whim12
POLR3E		0.57					0.49	0.65							POLR3E	POLR3E	POLR3E	POLR3E	NP_001244965-AN1-2-chr16_30_25_32	NP_001244965-AN1-2-chr16-22316527-22316699-stop63-whim2
CLN6		0.08					-0.004	0.164							CLN6	CLN6	CLN6	CLN6	NP_060352-AN2-3-chr15_182_240_254	NP_060352-AN2-3-chr15-68502957-68503600-stop307-whim4
COLGALT1		-0.3335									-0.64	-0.027			COLGALT1	COLGALT1	COLGALT1	COLGALT1	NP_078932-AN1-10-chr19_466_479_486	NP_078932-AN1-10-chr19-17690418-17691277-stop534-whim2
RNF207		0.661							0.481	0.841					RNF207	RNF207	RNF207	RNF207	NP_997279-AN1-13-chr1_495_490_499	NP_997279-AN1-13-chr1-6272476-6272727-stop640-whim2
THADA		0.3145							0.081	0.548					THADA	THADA	THADA	THADA	NP_071348-AN2-9-chr2_1449_1449_1456	NP_071348-AN2-9-chr2-43565075-43571260-stop1486-whim30
CCNH		0.5585									0.211	0.906			CCNH	CCNH	CCNH	CCNH	NP_001230-AN2-7-chr5_106_89_111	NP_001230-AN2-7-chr5-86703953-86705106-stop124-whim12
SRSF11		NaN													SRSF11	SRSF11	SRSF11	SRSF11	NP_004759-AN1-11-chr1_420_417_428	NP_004759-AN1-11-chr1-70716186-70716262-stop435-whim2
CDC20		NaN													CDC20	CDC20	CDC20	CDC20	NP_001246-AN1-3-chr1_143_162_179	NP_001246-AN1-3-chr1-43825492-43825620-stop186-whim6
RANBP2		NaN													RANBP2	RANBP2	RANBP2	RANBP2	NP_006258-AN1-19-chr2_901_1066_1079	NP_006258-AN1-19-chr2-109378651-109382620-stop1648-whim12
CD46		NaN													CD46	CD46	CD46	CD46	NP_758862-AN1-4-chr1_159_154_166	NP_758862-AN1-4-chr1-207933069-207934595-stop175-whim2
CDKAL1		-0.4855											-0.297	-0.674	CDKAL1	CDKAL1	CDKAL1	CDKAL1	NP_060244-A-1-3_58_65_74	NP_060244-A-1-3-chr6-20546754-20649523-113-stop78-whim12
ACTN4_2		NaN													ACTN4_2	ACTN4	ACTN4_2	ACTN4_2	NP_004915-AN1-11-chr19_432_448_458	NP_004915-AN1-11-chr19-39208714-39209389-stop510-whim21
MASP2		0.59											0.75	0.43	MASP2	MASP2	MASP2	MASP2	NP_631947-A-2-4_79_190_205	NP_631947-A-2-4-chr1-11105596-11106947-178-stop224-whim21
RALY		0.24											0.247	0.233	RALY	RALY	RALY	RALY	NP_057951-A-5-7_220_217_226	NP_057951-A-5-7-chr20-32664621-32666310-218-stop229-whim12
MAP3K6		1.267					1.248	1.286							MAP3K6	MAP3K6	MAP3K6	MAP3K6	NP_004663-AN2-12-chr1_810_947_972	NP_004663-AN2-12-chr1-27685347-27685907-stop988-whim2
AKAP10		-0.3915											-0.471	-0.312	AKAP10	AKAP10	AKAP10	AKAP10	NP_009133-AN2-5-chr17_585_581_589	NP_009133-AN2-5-chr17-19823428-19827720-stop662-whim2
TMED4		-1.5155					-2.325	-0.706							TMED4	TMED4	TMED4	TMED4	NP_872353-AN2-4-chr7_88_99_111	NP_872353-AN2-4-chr7-44621183-44621321-stop112-whim12
LOC81691		NaN													LOC81691	LOC81691	LOC81691	LOC81691	NP_001185982-AN1-16-chr16_646_636_647	NP_001185982-AN1-16-chr16-20856167-20856423-stop774-whim2
PC		0.9585									0.647	1.27			PC	PC	PC	PC	NP_071504-AN2-14-chr11_341_414_427	NP_071504-AN2-14-chr11-66633816-66636316-stop442-whim2
SLC27A1		NaN													SLC27A1	SLC27A1	SLC27A1	SLC27A1	NP_940982-AN1-2-chr19_188_215_222	NP_940982-AN1-2-chr19-17597766-17597912-stop333-whim2
MTCH1		0.0705									-0.065	0.206			MTCH1	MTCH1	MTCH1	MTCH1	NP_055156-A-4-9_198_197_209	NP_055156-A-4-9-chr6-36938470-36945853-264-whim2
PRDM11		0.176					0.329	0.023							PRDM11	PRDM11	PRDM11	PRDM11	NP_001243625-AN1-4-chr11_186_186_193	NP_001243625-AN1-4-chr11-45226329-45230424-stop421-whim12
CARM1		-1.1305											-1.312	-0.949	CARM1	CARM1	CARM1	CARM1	NP_954592-AN1-3-chr19_152_272_286	NP_954592-AN1-3-chr19-11018821-11019465-stop331-whim30
UVSSA		2.089					2.106	2.072							UVSSA	UVSSA	UVSSA	UVSSA	NP_065945-AN1-5-chr4_350_360_373	NP_065945-AN1-5-chr4-1348635-1348774-stop409-whim30
TRIP12		NaN													TRIP12	TRIP12	TRIP12	TRIP12	NP_004229-AN2-17-chr2_1248_1236_1248	NP_004229-AN2-17-chr2-230657847-230659894-stop1285-whim12
CDH5		NaN													CDH5	CDH5	CDH5	CDH5	NP_001786-AN1-10-chr16_613_648_657	NP_001786-AN1-10-chr16-66434919-66436778-stop679-whim2
ACADVL		-1.2435					-1.198	-1.289							ACADVL	ACADVL	ACADVL	ACADVL	NP_001257376-AN1-12-chr17_418_406_418	NP_001257376-AN1-12-chr17-7126556-7126801-stop428-whim12
MAP4K3		NaN													MAP4K3	MAP4K3	MAP4K3	MAP4K3	NP_003609-A-12-14_530_527_536	NP_003609-A-12-14-chr2-39507497-39513992-42-whim2
SUZ12		-0.0535					-0.03	-0.077							SUZ12	SUZ12	SUZ12	SUZ12	NP_056170-AN1-8-chr17_307_307_324	NP_056170-AN1-8-chr17-30303633-30315340-stop367-whim2
NFX1		NaN													NFX1	NFX1	NFX1	NFX1	NP_667344-AN1-11-chr9_679_677_687	NP_667344-AN1-11-chr9-33332500-33338504-stop708-whim12
SLC4A2		NaN													SLC4A2	SLC4A2	SLC4A2	SLC4A2	NP_001186621-AN1-15-chr7_846_879_898	NP_001186621-AN1-15-chr7-150769223-150770418-stop904-whim30
CTSA		0.48									0.57	0.39			CTSA	CTSA	CTSA	CTSA	NP_000299-A-7-9_249_271_289	NP_000299-A-7-9-chr20-44521950-44523288-85-stop356-whim2
UTP18		0.0505									0.487	-0.386			UTP18	UTP18	UTP18	UTP18	NP_057085-AN1-10-chr17_444_449_471	NP_057085-AN1-10-chr17-49362729-49363843-stop535-whim12
PPP3CB		0.3985									-0.012	0.809			PPP3CB	PPP3CB	PPP3CB	PPP3CB	NP_066955-A-10-12_138_153_162	NP_066955-A-10-12-chr10-75231371-75238256-112-stop163-whim30
NUMBL		2.184					2.796	1.572							NUMBL	NUMBL	NUMBL	NUMBL	NP_004747-A-3-5_181_241_251	NP_004747-A-3-5-chr19-41179554-41186821-190-stop260-whim30
P4HA1		0.2015									0.042	0.361			P4HA1	P4HA1	P4HA1	P4HA1	NP_001136068-AN2-5-chr10_417_438_455	NP_001136068-AN2-5-chr10-74776654-74790028-stop470-whim30
NOL10		1.591					1.816	1.366							NOL10	NOL10	NOL10	NOL10	NP_079170-AN2-9-chr2_343_336_349	NP_079170-AN2-9-chr2-10774685-10784445-stop370-whim2
ZNF462_1		0.136					0.218	0.054							ZNF462_1	ZNF462	ZNF462_1	ZNF462_1	NP_067047-AN1-3-chr9_2005_2005_2015	NP_067047-AN1-3-chr9-109692970-109693125-stop2051-whim2
H2AFY		0.944									0.549	1.339			H2AFY	H2AFY	H2AFY	H2AFY	NP_613075-AN2-8-chr5_58_66_87	NP_613075-AN2-8-chr5-134696295-134724611-stop124-whim2
BAIAP2		NaN													BAIAP2	BAIAP2	BAIAP2	BAIAP2	NP_059345-AN1-9-chr17_357_351_364	NP_059345-AN1-9-chr17-79077908-79078310-stop442-whim12
EPS8L2		0.0075									-0.136	0.151			EPS8L2	EPS8L2	EPS8L2	EPS8L2	NP_073609-AN1-4-chr11_110_103_118	NP_073609-AN1-4-chr11-720223-720548-stop327-whim12
SFI1		-0.679					-0.321	-1.037							SFI1	SFI1	SFI1	SFI1	NP_001007468-A-16-21_603_743_753	NP_001007468-A-16-21-chr22-31998771-32003922-352-stop783-whim2
FBXL5		NaN													FBXL5	FBXL5	FBXL5	FBXL5	NP_001180463-AN2-8-chr4_195_192_202	NP_001180463-AN2-8-chr4-15638294-15640130-stop209-whim12
MYO9B		-0.193					-0.716	0.33							MYO9B	MYO9B	MYO9B	MYO9B	NP_004136-AN1-23-chr19_1414_1417_1428	NP_004136-AN1-23-chr19-17309117-17311069-stop1463-whim12
ZNF704		NaN													ZNF704	ZNF704	ZNF704	ZNF704	NP_001028895-AN2-8-chr8_75_98_106	NP_001028895-AN2-8-chr8-81700895-81733608-stop110-whim30
NCOR2_2		1.1335					1.555	0.712							NCOR2_2	NCOR2	NCOR2_2	NCOR2_2	NP_006303-A-26-28_937_987_998	NP_006303-A-26-28-chr12-124846843-124856567-121-stop1022-whim2
ASAH1		-1.3235					-1.344	-1.303							ASAH1	ASAH1	ASAH1	ASAH1	NP_001120977-AN2-13-chr8_59_50_59	NP_001120977-AN2-13-chr8-17928894-17933049-stop69-whim2
SMC4		-0.0445					0.167	-0.256							SMC4	SMC4	SMC4	SMC4	NP_005487-AN1-4-chr3_230_225_233	NP_005487-AN1-4-chr3-160122292-160124201-stop238-whim12
NEK7		-0.0295									-0.2	0.141			NEK7	NEK7	NEK7	NEK7	NP_598001-AN1-5-chr1_161_165_172	NP_598001-AN1-5-chr1-198247199-198247811-stop173-whim2
MED27		0.965					1.511	0.419							MED27	MED27	MED27	MED27	NP_001240810-AN2-6-chr9_117_117_125	NP_001240810-AN2-6-chr9-134935761-134952828-stop135-whim6
TMX3		NaN													TMX3	TMX3	TMX3	TMX3	NP_061895-AN2-15-chr18_35_12_36	NP_061895-AN2-15-chr18-66379733-66381082-stop136-whim12
DLG5		0.7245									0.282	1.167			DLG5	DLG5	DLG5	DLG5	NP_004738-AN2-17-chr10_1177_1209_1217	NP_004738-AN2-17-chr10-79579446-79579652-stop1340-whim12
DDX26B		0.7945							0.036	1.553					DDX26B	DDX26B	DDX26B	DDX26B	NP_872346-A-13-15_592_606_623	NP_872346-A-13-15-chrX-134709151-134713712-235-stop624-whim2
KMT2A		NaN													KMT2A	KMT2A	KMT2A	KMT2A	NP_001184033-AN1-33-chr11_3811_3808_3826	NP_001184033-AN1-33-chr11-118390779-118391519-stop3848-whim2
DAGLB		-0.2225									-0.306	-0.139			DAGLB	DAGLB	DAGLB	DAGLB	NP_631918-A-12-14_83_197_210	NP_631918-A-12-14-chr7-6474651-6485583-172-stop218-whim2
PLCB2		-1.7265											-1.6	-1.853	PLCB2	PLCB2	PLCB2	PLCB2	NP_004564-AN2-26-chr15_195_207_222	NP_004564-AN2-26-chr15-40593375-40594157-stop273-whim30
TGFB2		NaN													TGFB2	TGFB2	TGFB2	TGFB2	NP_001129071-AN1-5-chr1_280_271_290	NP_001129071-AN1-5-chr1-218607790-218609426-stop405-whim2
SCNN1D		NaN													SCNN1D	SCNN1D	SCNN1D	SCNN1D	NP_001123885-AN1-10-chr1_468_462_491	NP_001123885-AN1-10-chr1-1222976-1223122-stop780-whim2
SLC25A44		0.869							0.586	1.152					SLC25A44	SLC25A44	SLC25A44	SLC25A44	NP_055470-AN1-2-chr1_252_248_255	NP_055470-AN1-2-chr1-156177804-156177956-stop293-whim30
ADAMTS18		0.055									-0.105	0.215			ADAMTS18	ADAMTS18	ADAMTS18	ADAMTS18	NP_955387-AN2-21-chr16_166_202_212	NP_955387-AN2-21-chr16-77401567-77465191-stop256-whim6
POMT2		0.0675									-0.028	0.163			POMT2	POMT2	POMT2	POMT2	NP_037514-AN2-13-chr14_373_377_394	NP_037514-AN2-13-chr14-77759634-77762506-stop395-whim30
ARHGAP40		0.73					0.814	0.646							ARHGAP40	ARHGAP40	ARHGAP40	ARHGAP40	NP_001157903-AN1-3-chr20_186_177_192	NP_001157903-AN1-3-chr20-37255858-37258147-stop649-whim30
IDH2		NaN													IDH2	IDH2	IDH2	IDH2	NP_002159-AN2-7-chr15_227_206_235	NP_002159-AN2-7-chr15-90630785-90631590-stop241-whim2
NES		NaN													NES	NES	NES	NES	NP_006608-AN2-3-chr1_306_293_318	NP_006608-AN2-3-chr1-156643723-156645007-stop326-whim2
ACTR3_1		0.955											0.963	0.947	ACTR3_1	ACTR3	ACTR3_1	ACTR3_1	NP_005712-AN1-7-chr2_229_238_251	NP_005712-AN1-7-chr2-114697679-114698416-stop264-whim2
CHUK		-0.1515					-0.021	-0.282							CHUK	CHUK	CHUK	CHUK	NP_001269-AN2-5-chr10_609_603_611	NP_001269-AN2-5-chr10-101953786-101954181-stop712-whim2
NT5DC2		NaN													NT5DC2	NT5DC2	NT5DC2	NT5DC2	NP_001127703-AN2-12-chr3_165_182_195	NP_001127703-AN2-12-chr3-52562800-52562876-stop198-whim12
PAPSS2		-0.9915					-1.007	-0.976							PAPSS2	PAPSS2	PAPSS2	PAPSS2	NP_001015880-AN1-2-chr10_49_38_51	NP_001015880-AN1-2-chr10-89469070-89472973-stop573-whim12
SPATA20		-0.5495					-1.213	0.114							SPATA20	SPATA20	SPATA20	SPATA20	NP_073738-AN1-8-chr17_332_343_355	NP_073738-AN1-8-chr17-48627476-48627590-stop796-whim30
TPI1		0.788									0.921	0.655			TPI1	TPI1	TPI1	TPI1	NP_001152759-AN1-5-chr12_219_213_223	NP_001152759-AN1-5-chr12-6978937-6979218-stop261-whim12
MAPK11		-2.708									-2.803	-2.613			MAPK11	MAPK11	MAPK11	MAPK11	NP_002742-A-9-11_84_118_125	NP_002742-A-9-11-chr22-50705911-50706248-59-stop143-whim12
ZNF589		NaN													ZNF589	ZNF589	ZNF589	ZNF589	NP_057173-AN1-2-chr3_33_29_37	NP_057173-AN1-2-chr3-48289167-48309407-stop121-whim2
TRIP4		-0.1465									-0.312	0.019			TRIP4	TRIP4	TRIP4	TRIP4	NP_057297-AN1-6-chr15_276_269_277	NP_057297-AN1-6-chr15-64698658-64701978-stop291-whim30
ALS2		NaN													ALS2	ALS2	ALS2	ALS2	NP_065970-AN2-10-chr2_1335_1317_1335	NP_065970-AN2-10-chr2-202579902-202580394-stop1399-whim2
APRT		NaN													APRT	APRT	APRT	APRT	NP_001025189-AN2-4-chr16_64_52_68	NP_001025189-AN2-4-chr16-88877770-88877957-stop78-whim6
DNAJC10		-0.406									-0.241	-0.571			DNAJC10	DNAJC10	DNAJC10	DNAJC10	NP_061854-AN1-19-chr2_716_717_728	NP_061854-AN1-19-chr2-183624034-183627378-stop787-whim2
HNRNPU		0.532									0.848	0.216			HNRNPU	HNRNPU	HNRNPU	HNRNPU	NP_114032-AN2-3-chr1_785_847_857	NP_114032-AN2-3-chr1-245018389-245018725-stop866-whim12
CEP290		0.695					0.78	0.61							CEP290	CEP290	CEP290	CEP290	NP_079390-A-7-9_2120_2114_2124	NP_079390-A-7-9-chr12-88453797-88456468-165-whim30
TLN1		0.38							0.26	0.5					TLN1	TLN1	TLN1	TLN1	NP_006280-A-25-27_1372_1369_1385	NP_006280-A-25-27-chr9-35710680-35710985-90-variant-whim12
TMEM184A		NaN													TMEM184A	TMEM184A	TMEM184A	TMEM184A	NP_001091089-AN2-5-chr7_185_253_271	NP_001091089-AN2-5-chr7-1589522-1589758-stop403-whim2
IFI44		NaN													IFI44	IFI44	IFI44	IFI44	NP_006408-AN1-5-chr1_338_377_398	NP_006408-AN1-5-chr1-79125168-79128392-stop413-whim30
REEP6		NaN													REEP6	REEP6	REEP6	REEP6	NP_612402-AN1-3-chr19_117_142_162	NP_612402-AN1-3-chr19-1495606-1496315-stop179-whim30
NOL8		NaN													NOL8	NOL8	NOL8	NOL8	NP_060418-A-9-14_95_89_99	NP_060418-A-9-14-chr9-95072957-95083949-2191-stop156-whim2
MRS2		-0.294							0.048	-0.636					MRS2	MRS2	MRS2	MRS2	NP_065713-AN1-5-chr6_197_226_235	NP_065713-AN1-5-chr6-24412623-24415275-stop244-whim2
FANCA		0.193							0.199	0.187					FANCA	FANCA	FANCA	FANCA	NP_000126-AN2-24-chr16_610_610_629	NP_000126-AN2-24-chr16-89842219-89845208-stop638-whim2
SYNCRIP		NaN													SYNCRIP	SYNCRIP	SYNCRIP	SYNCRIP	NP_006363-A-5-8_126_124_132	NP_006363-A-5-8-chr6-86333830-86349938-291-variant-whim4

## Sheet: Treatment_two-sample t-test
id	adj.P.Val.RES.vs.SENS	AveExpr.RES.vs.SENS	Log.P.Value.RES.vs.SENS	logFC.RES.vs.SENS	P.Value.RES.vs.SENS	t.RES.vs.SENS	W2_D3.B.50h	W2_D3.WO.50h	W12_D3.B.50h	W12_D3.WO.50h	W4_D3.B.50h	W4_D3.WO.50h	W30_D3.B.50h	W30_D3.WO.50h	id.1.x	id.query	id.mapped	id.concat	id.1.y	accession_number
RAB11FIP5	0.790254	-0.0285	2.26246	-0.0465	0.593956	-0.551419	0.072	-0.025	-0.08	0.012	-0.18	-0.032	-0.127	0.132	RAB11FIP5	RAB11FIP5	RAB11FIP5	RAB11FIP5	NP_056285-AN2-3-chr2_523_585_611	NP_056285-AN2-3-chr2-73308548-73315177-stop1114-whim2
LIME1	0.194333	0.144625	12.6776	0.59625	0.0539815	2.19513	-0.008	0.493	-0.805	-0.294	0.431	0.141	0.197	1.002	LIME1	LIME1	LIME1	LIME1	NP_060276-AN1-1-chr20_34_73_104	NP_060276-AN1-1-chr20-62369000-62369197-stop181-whim6
SF1	0.388746	0.078125	7.71659	-0.15875	0.169177	-1.4868	0.015	-0.01	0.198	0.427	0.02	-0.069	-0.083	0.127	SF1	SF1	SF1	SF1	NP_004621-AN2-4-chr11_448_548_560	NP_004621-AN2-4-chr11-64534748-64535042-stop619-whim30
MATR3	0.741984	0.08025	3.0876	0.0595	0.491179	0.715784	-0.033	0.208	-0.001	0.028	0.037	0.245	0.125	0.033	MATR3	MATR3	MATR3	MATR3	NP_061322-AN1-11-chr5_717_719_742	NP_061322-AN1-11-chr5-138658656-138660984-stop846-whim12
ARFGAP3	0.638504	-0.03175	4.01662	-0.0815	0.396587	-0.887359	0.121	-0.056	-0.091	0.062	-0.124	0.146	-0.157	-0.155	ARFGAP3	ARFGAP3	ARFGAP3	ARFGAP3	NP_055385-A-4-6_355_341_355	NP_055385-A-4-6-chr22-43204896-43213147-132-variant-whim21
FUBP1	0.776052	-0.001375	2.62719	0.06325	0.546111	0.625695	0.114	0.029	-0.045	-0.23	-0.154	-0.018	0.132	0.161	FUBP1	FUBP1	FUBP1	FUBP1	NP_003893-AN2-17-chr1_97_78_97	NP_003893-AN2-17-chr1-78432783-78433310-stop120-whim12
PALLD	0.222561	-0.203375	11.545	-0.27475	0.0700654	-2.03801	-0.123	-0.005	-0.064	-0.072	-0.645	-0.484	-0.291	0.057	PALLD	PALLD	PALLD	PALLD	NP_057165-AN1-9-chr4_656_684_718	NP_057165-AN1-9-chr4-169633074-169798873-stop880-whim12
ANXA6	0.125905	-0.055375	16.1116	-0.27175	0.0244815	-2.66554	0.069	-0.073	0.096	0.23	-0.355	-0.318	-0.038	-0.054	ANXA6	ANXA6	ANXA6	ANXA6	NP_001146-A-5-7_525_510_534	NP_001146-A-5-7-chr5-150489407-150496687-18-whim12
PCBP2	0.800013	0.023125	1.49112	0.02925	0.709394	0.383941	-0.091	-0.032	0.058	0.099	-0.013	-0.054	0.102	0.116	PCBP2	PCBP2	PCBP2	PCBP2	NP_005007-A-7-10_198_177_200	NP_005007-A-7-10-chr12-53856351-53861004-135-whim12
EWSR1	0.388746	0.00525	7.71808	0.165	0.169119	1.48702	-0.056	0.201	-0.297	-0.157	0.109	-0.044	0.066	0.22	EWSR1	EWSR1	EWSR1	EWSR1	NP_053733-AN1-15-chr22_533_524_545	NP_053733-AN1-15-chr22-29694885-29695184-stop580-whim12
HNRNPK	0.81206	0.079	1.37064	0.0335	0.729351	0.356267	0.246	0.167	-0.062	-0.102	0.091	0.194	0.033	0.065	HNRNPK	HNRNPK	HNRNPK	HNRNPK	NP_112552-A-9-11_111_104_115	NP_112552-A-9-11-chr9-86588314-86589431-72-whim12
VASP	0.890733	0.0635	0.708391	-0.018	0.849495	-0.194955	0.076	-0.081	0.163	0.132	0.011	0.239	-0.101	0.069	VASP	VASP	VASP	VASP	NP_003361-AN1-8-chr19_292_284_297	NP_003361-AN1-8-chr19-46026953-46027101-stop339-whim12
C11orf54	0.909807	0.1405	0.57441	0.013	0.876111	0.160116	0.237	0.095	0.195	0.009	0.085	0.059	0.176	0.268	C11orf54	C11orf54	C11orf54	C11orf54	NP_054758-AN1-5-chr11_170_195_211	NP_054758-AN1-5-chr11-93488552-93490481-stop229-whim12
TMPO	0.790254	0.266875	1.8706	0.10725	0.65004	0.468284	0.089	0.047	-0.096	0.813	0.066	-0.073	0.572	0.717	TMPO	TMPO	TMPO	TMPO	NP_001027454-A-4-7_222_217_225	NP_001027454-A-4-7-chr12-98931350-98938728-216-whim12
RPLP2	0.51296	-0.118875	5.43532	-0.13825	0.286067	-1.12968	0.309	-0.036	-0.253	-0.219	-0.247	-0.089	-0.265	-0.151	RPLP2	RPLP2	RPLP2	RPLP2	NP_000995-AN1-3-chr11_91_62_93	NP_000995-AN1-3-chr11-812633-812762-stop115-whim12
SEC31A	0.366352	-0.21425	8.36057	-0.207	0.145862	-1.5827	0.132	0.097	-0.271	-0.401	-0.388	-0.368	-0.387	-0.128	SEC31A	SEC31A	SEC31A	SEC31A	NP_001070675-A-13-15_517_511_519	NP_001070675-A-13-15-chr4-83778917-83783686-78-variant-whim2
UGGT1	0.790254	-0.0545	2.11157	0.069	0.614954	0.524405	-0.31	-0.145	0.04	0.105			0.02	-0.037	UGGT1	UGGT1	UGGT1	UGGT1	NP_064505-A-20-22_746_745_767	NP_064505-A-20-22-chr2-128913161-128914825-24-whim12
PTBP2		0.314									0.345	0.321		0.276	PTBP2	PTBP2	PTBP2	PTBP2	NP_067013-AN1-8-chr1_302_297_331	NP_067013-AN1-8-chr1-97250810-97270340-stop379-whim12
TNC	0.741984	0.161	3.05697	0.246	0.494656	0.709906	0.282	0.912	-0.73	-0.312	-0.244	0.23	0.222	0.928	TNC	TNC	TNC	TNC	NP_002151-A-12-14_1527_1519_1546	NP_002151-A-12-14-chr9-117808961-117819431-273-variant-whim6
GSTP1	0.638504	-0.23325	3.90596	-0.3565	0.406821	-0.867543	0.414	0.408	-0.677	-0.365	-1.041	-1.274	0.362	0.307	GSTP1	GSTP1	GSTP1	GSTP1	NP_000843-AN1-2-chr11_13_13_34	NP_000843-AN1-2-chr11-67351640-67351967-stop84-whim12
MYO6	0.790254	0.1665	2.12119	0.0695	0.613593	0.521873	0.448	0.319	-0.118	-0.122	0.194	0.144	0.183	0.284	MYO6	MYO6	MYO6	MYO6	NP_004990-A-31-33_1138_1133_1149	NP_004990-A-31-33-chr6-76618344-76623779-27-whim12
FMR1	0.217013	-0.05775	11.8735	-0.255	0.0649613	-2.08375	0.316	0.155	-0.055	-0.137	-0.336	-0.337	-0.063	-0.005	FMR1	FMR1	FMR1	FMR1	NP_002015-AN1-16-chrX_580_573_587	NP_002015-AN1-16-chrX-147027136-147030253-stop616-whim12
PRKCSH	0.451949	0.11825	6.53477	-0.1225	0.222087	-1.30573	0.097	0.073	0.299	0.249	-0.152	0.184	0.082	0.114	PRKCSH	PRKCSH	PRKCSH	PRKCSH	NP_001001329-AN1-10-chr19_344_344_362	NP_001001329-AN1-10-chr19-11558433-11558507-stop408-whim12
MEMO1	0.883873	-0.097875	0.784339	-0.02075	0.834769	-0.21434	0.094	-0.026	-0.267	-0.151	-0.181	0.031	-0.219	-0.064	MEMO1	MEMO1	MEMO1	MEMO1	NP_057039-AN2-4-chr2_195_176_196	NP_057039-AN2-4-chr2-32112157-32117060-stop204-whim2
ACTN4	0.384054	-0.013625	8.05578	-0.15075	0.156467	-1.53752	0.086	0.102	0.027	0.032	-0.251	-0.256	0.031	0.12	ACTN4	ACTN4	ACTN4	ACTN4	NP_004915-AN1-7-chr19_248_240_255	NP_004915-AN1-7-chr19-39200116-39201915-stop316-whim12
NAA15	0.0881427	-0.034375	19.1215	-0.24175	0.012242	-3.07812	-0.053	0.216	0.128	0.055	-0.214	-0.169	-0.17	-0.068	NAA15	NAA15	NAA15	NAA15	NP_476516-AN1-17-chr4_719_715_723	NP_476516-AN1-17-chr4-140300008-140305988-stop778-whim12
MAP4	0.741984	0.02225	3.1138	-0.087	0.488226	-0.720798	0.396	0.124	-0.059	-0.198	0.075	-0.032	-0.042	-0.086	MAP4	MAP4	MAP4	MAP4	NP_002366-A-13-15_177_174_183	NP_002366-A-13-15-chr3-47958664-47963254-123-variant-whim30
GPS1	0.0674053	-0.05225	21.6334	-0.3125	0.00686535	-3.42749	0.08	0.028	0.268	0.04	-0.257	-0.371	-0.143	-0.063	GPS1	GPS1	GPS1	GPS1	NP_997657-AN1-5-chr17_270_261_270	NP_997657-AN1-5-chr17-80012851-80013040-stop311-whim12
CASK	0.51296	-0.033125	5.27094	-0.14225	0.297102	-1.10258	0.173	-0.172	-0.052	0.203	0.079	0.104	-0.29	-0.31	CASK	CASK	CASK	CASK	NP_001119526-A-7-9_580_573_583	NP_001119526-A-7-9-chrX-41413168-41419031-36-whim12
PRPF40A	0.0969518	0.075125	18.1642	-0.24525	0.0152609	-2.94641	0.412	0.139	0.104	0.136	-0.03	-0.068	-0.08	-0.012	PRPF40A	PRPF40A	PRPF40A	PRPF40A	NP_060362-A-18-20_193_187_196	NP_060362-A-18-20-chr2-153533989-153535865-54-whim12
HNRNPM	0.790254	0.038	1.79784	0.0685	0.661023	0.452422	0.21	0.076	-0.084	-0.187	-0.2	-0.119	0.128	0.48	HNRNPM	HNRNPM	HNRNPM	HNRNPM	NP_005959-A-12-14_374_372_385	NP_005959-A-12-14-chr19-8539128-8550486-54-whim12
SUN1	0.790254	0.014875	1.95802	0.03375	0.637086	0.487156	0.061	0.046	-0.056	-0.059	0.013	-0.037	0.038	0.113	SUN1	SUN1	SUN1	SUN1	NP_001124437-AN1-5-chr7_221_271_278	NP_001124437-AN1-5-chr7-883157-888054-stop288-whim12
MYO6_1	0.790254	-0.0335	1.73949	0.0795	0.669963	0.439601	0.106	0.039	-0.137	-0.301	-0.378	-0.245	0.172	0.476	MYO6_1	MYO6	MYO6_1	MYO6_1	NP_004990-A-27-30_1037_1036_1044	NP_004990-A-27-30-chr6-76602407-76617321-69-whim12
MACF1	0.911829	-0.0326667	0.523213	0.0145	0.8865	0.147603	0.073	0.011	-0.086	-0.148	-0.041	-0.005			MACF1	MACF1	MACF1	MACF1	NP_036222-AN1-35-chr1_1544_2578_2597	NP_036222-AN1-35-chr1-39793025-39796874-stop3371-whim12
MPRIP	0.313742	0.170333	9.33691	-0.191	0.116495	-1.77114	0.25	0.05	0.291	0.345	0.035	0.051			MPRIP	MPRIP	MPRIP	MPRIP	NP_055949-AN1-15-chr17_722_1672_1692	NP_055949-AN1-15-chr17-17064670-17067422-stop2004-whim12
EPB41	0.790254	-0.0541667	1.69229	0.041	0.677285	0.432662	-0.108	-0.055			-0.139	-0.067	0.063	-0.019	EPB41	EPB41	EPB41	EPB41	NP_001159477-AN1-15-chr1_729_744_757	NP_001159477-AN1-15-chr1-29391670-29422666-stop888-whim2
DCBLD1		-0.11275					-0.074	-0.156	-0.121	-0.1					DCBLD1	DCBLD1	DCBLD1	DCBLD1	NP_775945-AN1-14-chr6_539_530_553	NP_775945-AN1-14-chr6-117866760-117869069-stop716-whim12
LMO7	0.110156	0.1915	17.1266	0.3505	0.0193794	2.80425	0.093	0.016	-0.045	0.001	0.745	0.373	0.125	0.224	LMO7	LMO7	LMO7	LMO7	NP_056667-AN1-10-chr13_843_858_867	NP_056667-AN1-10-chr13-76408523-76409287-stop908-whim12
CAST	0.505213	0.127667	5.89586	0.12325	0.257285	1.2248	0.029	0.062			0.077	0.083	0.222	0.293	CAST	CAST	CAST	CAST	NP_001035905-AN1-23-chr5_604_577_606	NP_001035905-AN1-23-chr5-96098076-96100927-stop641-whim12
VASP_1	0.790254	0.0225	1.72496	-0.057	0.672209	-0.439974			0.127	-0.006	-0.216	-0.057	0.111	0.176	VASP_1	VASP	VASP_1	VASP_1	NP_003361-AN1-6-chr19_241_241_251	NP_003361-AN1-6-chr19-46025839-46025978-stop287-whim12
KRT7	0.92394	-0.0385	0.402357	0.0135	0.911516	0.114885	-0.092	-0.003			-0.071	-0.135	-0.118	0.188	KRT7	KRT7	KRT7	KRT7	NP_005547-AN1-6-chr12_329_327_335	NP_005547-AN1-6-chr12-52636921-52639177-stop429-whim2
SUN1_1	0.00138243	0.483875	48.9278	-1.20875	1.28003e-05	-8.16004	1.089	1.006	0.991	1.267	0.13	-0.017	-0.007	-0.588	SUN1_1	SUN1	SUN1_1	SUN1_1	NP_001124437-AN1-5-chr7_221_228_241	NP_001124437-AN1-5-chr7-883157-889559-stop291-whim2
HSP90AB1	0.842132	-0.19125	1.05854	-0.0425	0.783693	-0.288034			-0.216	-0.124			-0.055	-0.37	HSP90AB1	HSP90AB1	HSP90AB1	HSP90AB1	NP_001258898-AN1-4-chr6_216_205_216	NP_001258898-AN1-4-chr6-44217891-44218056-stop217-whim2
HNRNPA1	0.0762229	-0.026	20.3739	-0.417	0.00917498	-3.46858	0.325	0.179			-0.345	-0.191	-0.144	0.02	HNRNPA1	HNRNPA1	HNRNPA1	HNRNPA1	NP_002127-A-6-8_227_226_252	NP_002127-A-6-8-chr12-54676449-54677595-75-whim2
USP9X	0.108923	0.1095	17.4103	0.3165	0.0181538	2.99905	-0.005	0.137	0	-0.116			0.241	0.4	USP9X	USP9X	USP9X	USP9X	NP_001034679-AN1-12-chrX_589_575_591	NP_001034679-AN1-12-chrX-41010310-41012185-stop640-whim12
TACC2	0.506427	-0.0815	5.80719	0.168	0.262592	1.19019	-0.004	0.165	-0.328	-0.495	0.095	-0.095	-0.109	0.119	TACC2	TACC2	TACC2	TACC2	NP_996744-A-13-16_2633_2617_2633	NP_996744-A-13-16-chr10-123987523-123996909-231-variant-whim21
TNC_1	0.313742	-0.046125	9.24067	-0.20275	0.119106	-1.71127	0.192	-0.158	-0.047	0.234	-0.248	0.071	-0.329	-0.084	TNC_1	TNC	TNC_1	TNC_1	NP_002151-A-12-19_1072_1069_1091	NP_002151-A-12-19-chr9-117808961-117835881-1638-variant-whim6
PPIP5K2	0.782566	-0.112667	2.47808	0.062	0.565186	0.601247			-0.131	-0.177	-0.127	-0.235	0.021	-0.027	PPIP5K2	PPIP5K2	PPIP5K2	PPIP5K2	NP_001263206-A-23-25_975_970_984	NP_001263206-A-23-25-chr5-102515889-102520372-174-variant-whim6
ANKS1A	0.194333	0.084	12.704	-0.20325	0.0536538	-2.28149	0.225	0.081	0.179	0.122	-0.066	-0.037			ANKS1A	ANKS1A	ANKS1A	ANKS1A	NP_056060-AN1-3-chr6_147_142_151	NP_056060-AN1-3-chr6-34937943-34940357-stop203-whim12
ATXN2L	0.632015	-0.171833	4.13153	0.11425	0.386231	0.919256			-0.189	-0.307	-0.14	-0.35	-0.093	0.048	ATXN2L	ATXN2L	ATXN2L	ATXN2L	NP_680781-AN1-10-chr16_441_421_449	NP_680781-AN1-10-chr16-28842393-28843507-stop542-whim12
PSMA5	0.51296	-0.073875	5.41227	-0.16575	0.28759	-1.12589	0.08	0.263	-0.292	-0.015	-0.21	-0.488	0.017	0.054	PSMA5	PSMA5	PSMA5	PSMA5	NP_002781-AN2-2-chr1_217_210_230	NP_002781-AN2-2-chr1-109944709-109952549-stop241-whim12
TOP1MT	0.366352	-0.102167	8.37582	-0.1375	0.145351	-1.6226	-0.017	-0.004			-0.176	-0.094	-0.143	-0.179	TOP1MT	TOP1MT	TOP1MT	TOP1MT	NP_443195-AN2-3-chr8_518_532_541	NP_443195-AN2-3-chr8-144396756-144397896-stop553-whim21
EIF3I	0.194333	-0.116167	12.9399	-0.9305	0.0508175	-2.31705	0.815	0.764	-0.651	-0.152	-0.635	-0.838			EIF3I	EIF3I	EIF3I	EIF3I	NP_003748-AN1-10-chr1_300_299_308	NP_003748-AN1-10-chr1-32696620-32696721-stop324-whim2
SRRM1	0.313742	-0.009875	9.49784	-0.20475	0.112258	-1.74837	0.246	0.178	0.133	-0.187	-0.346	-0.119	-0.014	0.03	SRRM1	SRRM1	SRRM1	SRRM1	NP_005830-AN1-10-chr1_467_459_468	NP_005830-AN1-10-chr1-24987290-24987803-stop504-whim12
COL6A2	0.800013	0.189167	1.48055	-0.03475	0.711123	-0.38454	0.116	0.272	0.214	0.201	0.132	0.2			COL6A2	COL6A2	COL6A2	COL6A2	NP_001840-A-7-9_311_307_317	NP_001840-A-7-9-chr21-47536317-47536683-27-variant-whim30
MSN	0.790254	0.071875	2.37837	0.13575	0.578313	0.575328	0.556	0.438	-0.457	-0.521	0.252	0.08	0.086	0.141	MSN	MSN	MSN	MSN	NP_002435-AN1-11-chrX_449_449_456	NP_002435-AN1-11-chrX-64958479-64958837-stop533-whim2
GAPDH	0.158024	-0.24625	14.3002	0.3405	0.0371514	2.72097			-0.437	-0.396			0.021	-0.173	GAPDH	GAPDH	GAPDH	GAPDH	NP_002037-AN1-2-chr12_44_119_139	NP_002037-AN1-2-chr12-6645759-6645850-stop336-whim12
MGA	0.409461	-0.09575	7.3997	0.1705	0.181983	1.52358	-0.18	-0.182			-0.043	0.022			MGA	MGA	MGA	MGA	NP_001157745-AN1-12-chr15_1480_1489_1502	NP_001157745-AN1-12-chr15-42028896-42032103-stop1594-whim12
GSTP1_1	0.790254	0.14425	1.80479	-0.0695	0.659965	-0.464278			0.338	0.02			0.168	0.051	GSTP1_1	GSTP1	GSTP1_1	GSTP1_1	NP_000843-AN1-5-chr11_113_104_115	NP_000843-AN1-5-chr11-67352712-67353577-stop152-whim12
C1orf35	0.790254	0.0606667	1.6512	-0.03875	0.683723	-0.423423	0.125	0.048			0.006	0.047	-0.006	0.144	C1orf35	C1orf35	C1orf35	C1orf35	NP_077295-A-4-6_98_132_149	NP_077295-A-4-6-chr1-228290083-228290343-83-stop152-whim2
SF3B2	0.157839	0.0886667	14.55	0.23375	0.0350753	2.56043	0.103	-0.055	-0.042	0.037			0.253	0.236	SF3B2	SF3B2	SF3B2	SF3B2	NP_006833-AN1-6-chr11_223_223_246	NP_006833-AN1-6-chr11-65824426-65824739-stop261-whim12
EFCAB4A	0.757748	0.10325	2.78838	-0.1175	0.526214	-0.675611	0.249	0.075					-0.163	0.252	EFCAB4A	EFCAB4A	EFCAB4A	EFCAB4A	NP_775855-AN1-6-chr11_263_311_321	NP_775855-AN1-6-chr11-830713-830811-stop482-whim2
TTC17	0.313742	-0.0776667	9.33185	0.24725	0.116631	1.77036			-0.217	-0.268	0.034	0.286	-0.157	-0.144	TTC17	TTC17	TTC17	TTC17	NP_060729-AN1-16-chr11_752_767_784	NP_060729-AN1-16-chr11-43436326-43457713-stop812-whim12
FBLN2	0.609877	0.0475	4.35268	-0.15375	0.367055	-0.959079	0.137	0.163			-0.287	-0.147	0.199	0.22	FBLN2	FBLN2	FBLN2	FBLN2	NP_001004019-A-13-15_991_988_1005	NP_001004019-A-13-15-chr3-13671445-13672828-117-variant-whim12
PSIP1	0.0969518	0.0708333	18.2804	0.55825	0.014858	3.135	-0.372	-0.263	0.234	-0.06			0.301	0.585	PSIP1	PSIP1	PSIP1	PSIP1	NP_150091-AN2-7-chr9_326_316_326	NP_150091-AN2-7-chr9-15471208-15472629-stop327-whim2
ZC3H18	0.842132	-0.14675	1.03722	0.0505	0.787549	0.282735			-0.407	0.063			-0.116	-0.127	ZC3H18	ZC3H18	ZC3H18	ZC3H18	NP_653205-AN1-2-chr16_230_230_249	NP_653205-AN1-2-chr16-88653092-88653949-stop308-whim12
TMEM68	0.51296	-0.18875	5.46523	0.1675	0.284104	1.18447			-0.129	-0.416	-0.068	-0.142			TMEM68	TMEM68	TMEM68	TMEM68	NP_689630-AN2-2-chr8_230_256_276	NP_689630-AN2-2-chr8-56656180-56663522-stop300-whim2
MPRIP_1	0.92394	0.15375	0.383963	-0.0135	0.915385	-0.11114	0.193	0.128					0.226	0.068	MPRIP_1	MPRIP	MPRIP_1	MPRIP_1	NP_055949-A-18-20_864_854_867	NP_055949-A-18-20-chr17-17077389-17079739-120-variant-whim21
CDV3	0.638504	-0.3015	3.89411	0.18225	0.407933	0.875907			-0.267	-0.579	-0.455	-0.586	0.032	0.046	CDV3	CDV3	CDV3	CDV3	NP_001127894-AN1-2-chr3_107_100_115	NP_001127894-AN1-2-chr3-133293959-133302848-stop165-whim12
POSTN	0.51296	0.24025	5.21858	-0.1235	0.300706	-1.09389	0.356	0.572	0.032	0.248	0.087	0.115	0.239	0.273	POSTN	POSTN	POSTN	POSTN	NP_006466-A-4-8_670_663_674	NP_006466-A-4-8-chr13-38143958-38151889-261-whim30
CPSF6		-0.0625									-0.186	-0.241	0.087	0.09	CPSF6	CPSF6	CPSF6	CPSF6	NP_008938-AN1-5-chr12_232_251_268	NP_008938-AN1-5-chr12-69651685-69651814-stop293-whim12
NUDT5	0.385429	0.048	7.94267	-0.28425	0.160595	-1.55486	0.219	0.256			-0.162	-0.39	0.053	0.312	NUDT5	NUDT5	NUDT5	NUDT5	NP_054861-A-2-4_163_160_172	NP_054861-A-2-4-chr10-12212769-12214763-9-whim2
SSFA2	0.217013	0.161	11.9067	-0.20775	0.064466	-2.16127	0.181	0.229	0.288	0.223	-0.077	0.122			SSFA2	SSFA2	SSFA2	SSFA2	NP_001123917-A-14-16_1049_1044_1060	NP_001123917-A-14-16-chr2-182784173-182786674-66-variant-whim6
HNRNPM_1		-0.03075									-0.038	-0.025	-0.062	0.002	HNRNPM_1	HNRNPM	HNRNPM_1	HNRNPM_1	NP_005959-A-10-13_333_323_340	NP_005959-A-10-13-chr19-8536311-8548041-123-whim2
FLNA	0.744954	-0.0398333	2.92693	-0.068	0.509691	-0.691743			-0.036	0.047	-0.147	-0.037	-0.125	0.059	FLNA	FLNA	FLNA	FLNA	NP_001104026-A-39-41_410_401_417	NP_001104026-A-39-41-chrX-153593854-153594675-201-variant-whim30
KRT7_1	0.0416527	-0.062625	26.1391	0.40525	0.00243269	4.07497	-0.299	-0.406	-0.318	-0.038	0.06	0.025	0.175	0.3	KRT7_1	KRT7	KRT7_1	KRT7_1	NP_005547-AN1-7-chr12_403_395_403	NP_005547-AN1-7-chr12-52639416-52641923-stop428-whim2
EIF4B	0.842132	0.1705	1.09786	0.035	0.77663	0.297765	0.085	0.221			0.181	0.195			EIF4B	EIF4B	EIF4B	EIF4B	NP_001408-A-6-8_223_215_227	NP_001408-A-6-8-chr12-53416411-53421798-138-whim12
RAPGEF6	0.778603	0.0295	2.55617	0.207	0.555115	0.61726	0.36	0.562	-0.655	-0.425	0.272	0.063			RAPGEF6	RAPGEF6	RAPGEF6	RAPGEF6	NP_001157860-AN2-13-chr5_694_712_719	NP_001157860-AN2-13-chr5-130808513-130815205-stop720-whim30
RPTOR	0.443034	0.14875	6.77902	0.1785	0.209942	1.41612	0.128	-0.009			0.314	0.162			RPTOR	RPTOR	RPTOR	RPTOR	NP_065812-AN1-18-chr17_701_776_786	NP_065812-AN1-18-chr17-78865637-78866530-stop831-whim2
KIAA0556	0.0246046	-0.434667	29.4344	0.7435	0.0011391	5.06428	-0.982	-0.574	-0.547	-0.627	-0.056	0.178			KIAA0556	KIAA0556	KIAA0556	KIAA0556	NP_056017-A-5-7_137_133_150	NP_056017-A-5-7-chr16-27642483-27689049-132-variant-whim12
ZNF618		0.08275									-0.095	0.025	0.16	0.241	ZNF618	ZNF618	ZNF618	ZNF618	NP_588615-AN1-10-chr9_270_326_336	NP_588615-AN1-10-chr9-116779064-116791012-stop388-whim12
HNRNPR		0.024									0.049	-0.001			HNRNPR	HNRNPR	HNRNPR	HNRNPR	NP_001095868-A-5-7_167_147_176	NP_001095868-A-5-7-chr1-23648156-23660010-177-variant-whim30
METAP1		-0.6855									-0.566	-0.805			METAP1	METAP1	METAP1	METAP1	NP_055958-AN1-6-chr4_172_148_172	NP_055958-AN1-6-chr4-99962277-99964472-stop173-whim30
MAP4_1	0.790254	0.02025	1.85075	0.0605	0.653017	0.474619	0.096	-0.116					0.035	0.066	MAP4_1	MAP4	MAP4_1	MAP4_1	NP_002366-A-16-18_75_64_84	NP_002366-A-16-18-chr3-47969840-48040127-69-variant-whim30
ZNF816-ZNF321P		-0.201									-0.471	-0.398	0.043	0.022	ZNF816-ZNF321P	ZNF816	ZNF816-ZNF321P	ZNF816-ZNF321P	NP_001189402-AN2-2-chr19_64_305_313	NP_001189402-AN2-2-chr19-53454834-53456003-stop651-whim2
RBM33	0.0621507	0.35825	22.8574	-0.7605	0.00517922	-4.4403	0.951	0.526					0.032	-0.076	RBM33	RBM33	RBM33	RBM33	NP_444271-AN1-14-chr7_994_990_1010	NP_444271-AN1-14-chr7-155538296-155556502-stop1140-whim12
KDM1B	0.28991	-0.17025	10.2709	-0.2275	0.0939524	-2.01517	-0.044	-0.069			-0.323	-0.245			KDM1B	KDM1B	KDM1B	KDM1B	NP_694587-AN1-9-chr6_322_342_349	NP_694587-AN1-9-chr6-18200807-18201716-stop386-whim12
PXDN	0.443034	0.0365	6.85678	0.201	0.206216	1.42963	0.032	-0.16					0.247	0.027	PXDN	PXDN	PXDN	PXDN	NP_036425-A-19-21_118_114_135	NP_036425-A-19-21-chr2-1687923-1695699-72-variant-whim6
CAST_1		-0.1195					0.147	-0.063	-0.291	-0.271					CAST_1	CAST	CAST_1	CAST_1	NP_001035905-A-2-4_47_42_56	NP_001035905-A-2-4-chr5-96011305-96058342-72-whim12
AKAP9		0.0295											-0.049	0.108	AKAP9	AKAP9	AKAP9	AKAP9	NP_005742-A-18-20_1640_1636_1654	NP_005742-A-18-20-chr7-91670212-91671981-141-variant-whim30
TTLL4		0.241											0.227	0.255	TTLL4	TTLL4	TTLL4	TTLL4	NP_055455-AN1-6-chr2_659_736_751	NP_055455-AN1-6-chr2-219610954-219611752-stop755-whim2
DAB2IP	0.842132	-0.09925	1.1371	0.0375	0.769644	0.307422	-0.183	-0.053			-0.139	-0.022			DAB2IP	DAB2IP	DAB2IP	DAB2IP	NP_115941-AN1-11-chr9_666_657_675	NP_115941-AN1-11-chr9-124533003-124534951-stop978-whim12
ZNF638		-0.01425									-0.029	0.054	-0.041	-0.041	ZNF638	ZNF638	ZNF638	ZNF638	NP_001239542-AN1-9-chr2_793_783_806	NP_001239542-AN1-9-chr2-71607695-71615752-stop868-whim12
KANK1		-0.331											-0.4	-0.262	KANK1	KANK1	KANK1	KANK1	NP_001243806-A-4-6_1002_993_1008	NP_001243806-A-4-6-chr9-731266-734747-240-whim2
NUDC		0.088					-0.01	0.186							NUDC	NUDC	NUDC	NUDC	NP_006591-AN1-4-chr1_144_143_155	NP_006591-AN1-4-chr1-27268309-27269147-stop220-whim12
FLNA_1	0.175448	0.31525	13.5791	-0.3205	0.0438621	-2.59159	0.457	0.494					0.063	0.247	FLNA_1	FLNA	FLNA_1	FLNA_1	NP_001104026-A-12-14_1896_1892_1901	NP_001104026-A-12-14-chrX-153581825-153582282-174-variant-whim30
ABLIM3	0.305516	0.232	9.9133	-0.35175	0.102016	-1.85932	0.034	0.15	0.667	0.546	0.086	-0.091			ABLIM3	ABLIM3	ABLIM3	ABLIM3	NP_055760-A-9-12_297_294_305	NP_055760-A-9-12-chr5-148612863-148619321-186-whim12
PAICS		NaN													PAICS	PAICS	PAICS	PAICS	NP_001072993-A-2-5_72_60_72	NP_001072993-A-2-5-chr4-57308026-57314583-200-stop73-whim2
NOLC1	0.0135673	0.075	32.9887	-0.71175	0.000502493	-5.78081	0.491	0.608			-0.195	-0.087	-0.372	0.005	NOLC1	NOLC1	NOLC1	NOLC1	NP_004732-AN1-10-chr10_581_580_589	NP_004732-AN1-10-chr10-103920850-103921013-stop614-whim12
CD82		-0.0655									0.052	-0.012	-0.09	-0.212	CD82	CD82	CD82	CD82	NP_002222-AN1-5-chr11_147_178_187	NP_002222-AN1-5-chr11-44636923-44639717-stop308-whim2
HNRNPA2B1	0.51296	-0.166	5.1716	-0.231	0.303977	-1.13159			-0.218	0.117	-0.515	-0.048			HNRNPA2B1	HNRNPA2B1	HNRNPA2B1	HNRNPA2B1	NP_112533-A-3-6_206_204_218	NP_112533-A-3-6-chr7-26233314-26236176-144-whim2
MACF1_1		-0.423									-0.406	-0.44			MACF1_1	MACF1	MACF1_1	MACF1_1	NP_036222-AN1-91-chr1_5303_5310_5320	NP_036222-AN1-91-chr1-39945681-39946591-stop5347-whim12
ABLIM3_1	0.0674053	0.267833	21.817	0.40225	0.00658109	3.70477	0.115	-0.022	0.208	0.234	0.611	0.461			ABLIM3_1	ABLIM3	ABLIM3_1	ABLIM3_1	NP_055760-A-12-14_402_401_409	NP_055760-A-12-14-chr5-148619451-148622053-99-whim12
PCBP2_1		-0.224							-0.189	-0.259					PCBP2_1	PCBP2	PCBP2_1	PCBP2_1	NP_005007-AN1-13-chr12_355_440_459	NP_005007-AN1-13-chr12-53865591-53868652-stop471-whim12
CCDC14		-0.1165					-0.132	-0.101							CCDC14	CCDC14	CCDC14	CCDC14	NP_073594-AN2-10-chr3_102_132_140	NP_073594-AN2-10-chr3-123674813-123675201-stop149-whim2
ETFA	0.992387	-0.00183333	0.0331878	0.00275	0.992387	0.00985964	0.421	0.42	-0.464	-0.388			-0.011	0.011	ETFA	ETFA	ETFA	ETFA	NP_000117-AN2-2-chr15_323_322_330	NP_000117-AN2-2-chr15-76508935-76518189-stop333-whim2
ATXN2L_1		-0.2505											-0.342	-0.159	ATXN2L_1	ATXN2L	ATXN2L_1	ATXN2L_1	NP_680780-A-11-13_507_499_514	NP_680780-A-11-13-chr16-28843720-28844137-72-whim2
GLS	0.51296	-0.145667	5.29062	0.194	0.295759	1.12282			-0.145	-0.405	-0.259	-0.346	0.125	0.156	GLS	GLS	GLS	GLS	NP_055720-AN1-14-chr2_551_551_559	NP_055720-AN1-14-chr2-191796363-191797382-stop560-whim12
GATAD2A		0.0015									-0.119	0.122			GATAD2A	GATAD2A	GATAD2A	GATAD2A	NP_060130-A-8-10_501_500_507	NP_060130-A-8-10-chr19-19612225-19613139-75-whim12
FMR1_1		0.2275					0.209	0.246							FMR1_1	FMR1	FMR1_1	FMR1_1	NP_002015-AN1-16-chrX_580_573_580	NP_002015-AN1-16-chrX-147027136-147029932-stop583-whim12
DCAF10	0.0881427	-0.00875	19.2817	-0.4285	0.0117986	-3.67301	0.257	0.154			-0.261	-0.185			DCAF10	DCAF10	DCAF10	DCAF10	NP_077321-A-4-6_352_347_356	NP_077321-A-4-6-chr9-37854979-37860044-111-whim12
KHDRBS1		0.2115					0.157	0.266							KHDRBS1	KHDRBS1	KHDRBS1	KHDRBS1	NP_006550-A-5-7_303_347_354	NP_006550-A-5-7-chr1-32502644-32504152-202-stop356-whim12
RNF123		0.048											-0.01	0.106	RNF123	RNF123	RNF123	RNF123	NP_071347-A-21-23_654_671_678	NP_071347-A-21-23-chr3-49742189-49742966-199-stop690-whim2
CLMN		-0.2265							-0.041	-0.412					CLMN	CLMN	CLMN	CLMN	NP_079010-A-8-10_109_103_110	NP_079010-A-8-10-chr14-95679746-95688027-93-whim2
DHX35	0.443034	0.17	6.87655	-0.272	0.205279	-1.43307	0.553	0.059			-0.042	0.11			DHX35	DHX35	DHX35	DHX35	NP_068750-A-18-20_602_623_630	NP_068750-A-18-20-chr20-37654002-37659346-82-stop639-whim2
ZNF185		0.3145					0.496	0.133							ZNF185	ZNF185	ZNF185	ZNF185	NP_001171577-A-10-12_247_240_248	NP_001171577-A-10-12-chrX-152090800-152097118-90-whim12
XPR1		-0.607							-0.616	-0.598					XPR1	XPR1	XPR1	XPR1	NP_004727-AN1-9-chr1_379_377_386	NP_004727-AN1-9-chr1-180794480-180799802-stop394-whim6
EWSR1_1		-0.117									-0.248	0.014			EWSR1_1	EWSR1	EWSR1_1	EWSR1_1	NP_053733-AN1-14-chr22_483_477_485	NP_053733-AN1-14-chr22-29693939-29694740-stop543-whim4
DDX3X	0.51296	-0.0105	5.37866	0.255	0.289824	1.16893			-0.161	-0.115			-0.197	0.431	DDX3X	DDX3X	DDX3X	DDX3X	NP_001180346-AN1-2-chrX_35_36_43	NP_001180346-AN1-2-chrX-41196718-41198291-stop58-whim12
HMGN3	0.744954	0.3	2.92063	-0.08	0.510431	-0.702666	0.294	0.386			0.247	0.273			HMGN3	HMGN3	HMGN3	HMGN3	NP_001188291-AN2-2-chr6_50_120_127	NP_001188291-AN2-2-chr6-79912596-79913296-stop192-whim2
PPIA		0.0705							0.086	0.055					PPIA	PPIA	PPIA	PPIA	NP_066953-AN1-4-chr7_120_92_120	NP_066953-AN1-4-chr7-44839473-44840022-stop121-whim12
MTMR11		0.076											0.049	0.103	MTMR11	MTMR11	MTMR11	MTMR11	NP_001139334-A-11-14_109_106_115	NP_001139334-A-11-14-chr1-149906219-149907191-222-whim2
RAPGEF6_1	0.0135673	0.2225	33.5936	0.858	0.00043716	7.38178			-0.194	-0.219			0.591	0.712	RAPGEF6_1	RAPGEF6	RAPGEF6_1	RAPGEF6_1	NP_001157859-AN2-4-chr5_1263_1262_1280	NP_001157859-AN2-4-chr5-130772098-130775273-stop1413-whim2
TRIO		-0.093					-0.061	-0.125							TRIO	TRIO	TRIO	TRIO	NP_009049-AN1-2-chr5_78_73_85	NP_009049-AN1-2-chr5-14271008-14272473-stop117-whim2
LPIN1	0.0556185	0.165	23.8511	-0.7965	0.00411989	-4.04786	0.802	0.59			-0.449	-0.215	-0.042	0.304	LPIN1	LPIN1	LPIN1	LPIN1	NP_001248357-AN1-18-chr2_800_797_809	NP_001248357-AN1-18-chr2-11945282-11945672-stop882-whim2
FBXO38		-0.05575					0.191	-0.105	-0.441	0.132					FBXO38	FBXO38	FBXO38	FBXO38	NP_001258652-AN1-13-chr5_640_803_813	NP_001258652-AN1-13-chr5-147805264-147806772-stop898-whim2
KIRREL		-0.1065					0.01	-0.15	-0.266	-0.02					KIRREL	KIRREL	KIRREL	KIRREL	NP_060710-AN1-8-chr1_349_345_375	NP_060710-AN1-8-chr1-158058244-158059243-stop414-whim12
MPRIP_2		0.065											0.074	0.056	MPRIP_2	MPRIP	MPRIP_2	MPRIP_2	NP_055949-AN1-6-chr17_246_296_305	NP_055949-AN1-6-chr17-17039764-17041445-stop346-whim2
ZKSCAN7		0.183											0.051	0.315	ZKSCAN7	ZKSCAN7	ZKSCAN7	ZKSCAN7	NP_079445-AN1-4-chr3_272_437_445	NP_079445-AN1-4-chr3-44609925-44611416-stop754-whim12
PRKCSH_1		0.1355											0.209	0.062	PRKCSH_1	PRKCSH	PRKCSH_1	PRKCSH_1	NP_001001329-AN1-7-chr19_229_207_235	NP_001001329-AN1-7-chr19-11556288-11557062-stop304-whim12
GRB14		-0.514									-0.32	-0.708			GRB14	GRB14	GRB14	GRB14	NP_004481-AN2-13-chr2_109_125_137	NP_004481-AN2-13-chr2-165424914-165476196-stop183-whim2
NCLN	0.443034	-0.0775	6.70984	0.441	0.213313	1.40408	-0.78	0.184					0.241	0.045	NCLN	NCLN	NCLN	NCLN	NP_064555-AN1-11-chr19_446_433_463	NP_064555-AN1-11-chr19-3206188-3206262-stop524-whim12
ESRP1		0.164											-0.012	0.34	ESRP1	ESRP1	ESRP1	ESRP1	NP_060167-A-13-15_608_583_611	NP_060167-A-13-15-chr8-95690599-95709079-151-stop637-whim2
NT5C2		NaN													NT5C2	NT5C2	NT5C2	NT5C2	NP_036361-AN2-5-chr10_386_368_386	NP_036361-AN2-5-chr10-104851361-104852895-stop387-whim6
EPN2		-0.099					0.058	-0.256							EPN2	EPN2	EPN2	EPN2	NP_055779-AN1-4-chr17_325_324_344	NP_055779-AN1-4-chr17-19215457-19216435-stop385-whim12
HNRNPA3	0.158024	-0.0495	14.1973	-0.334	0.0380428	-2.70239	0.121	0.114			-0.123	-0.31			HNRNPA3	HNRNPA3	HNRNPA3	HNRNPA3	NP_919223-A-7-9_275_258_300	NP_919223-A-7-9-chr2-178081668-178083764-141-whim12
HNRNPA2B1_1	0.132985	-0.1035	15.5244	-0.363	0.0280259	-2.94477	-0.009	0.165			-0.254	-0.316			HNRNPA2B1_1	HNRNPA2B1	HNRNPA2B1_1	HNRNPA2B1_1	NP_112533-A-2-4_254_239_277	NP_112533-A-2-4-chr7-26232993-26235466-120-whim12
LSM14B		NaN													LSM14B	LSM14B	LSM14B	LSM14B	NP_653304-AN1-3-chr20_143_119_144	NP_653304-AN1-3-chr20-60701495-60702640-stop222-whim12
CAMSAP3		-0.046									-0.093	0.001			CAMSAP3	CAMSAP3	CAMSAP3	CAMSAP3	NP_001073898-A-4-6_208_192_215	NP_001073898-A-4-6-chr19-7671457-7672706-33-variant-whim30
ELN		-0.004											-0.073	0.065	ELN	ELN	ELN	ELN	NP_001265868-A-19-21_384_383_393	NP_001265868-A-19-21-chr7-73469099-73471001-165-whim2
CHD3		NaN													CHD3	CHD3	CHD3	CHD3	NP_001005271-AN1-36-chr17_1858_2014_2024	NP_001005271-AN1-36-chr17-7812147-7812598-stop2054-whim30
HNRNPM_2		NaN													HNRNPM_2	HNRNPM	HNRNPM_2	HNRNPM_2	NP_005959-A-10-12_335_323_347	NP_005959-A-10-12-chr19-8536311-8539050-45-whim12
EPB41L1		-0.0175									-0.058	0.023			EPB41L1	EPB41L1	EPB41L1	EPB41L1	NP_036288-AN1-16-chr20_757_739_760	NP_036288-AN1-16-chr20-34802362-34806800-stop820-whim12
GMIP		NaN													GMIP	GMIP	GMIP	GMIP	NP_057657-A-7-9_443_434_458	NP_057657-A-7-9-chr19-19746378-19747515-78-whim12
SH3PXD2A	0.790254	0.01075	1.62529	-0.0485	0.687814	-0.423376	0.087	-0.017					-0.008	-0.019	SH3PXD2A	SH3PXD2A	SH3PXD2A	SH3PXD2A	NP_055446-A-7-9_143_142_163	NP_055446-A-7-9-chr10-105420872-105452785-45-whim12
SIL1		-0.377							-0.456	-0.298					SIL1	SIL1	SIL1	SIL1	NP_071909-A-3-5_216_271_288	NP_071909-A-3-5-chr5-138287573-138362489-122-stop310-whim12
BPTF		-0.2215					-0.191	-0.252							BPTF	BPTF	BPTF	BPTF	NP_872579-AN1-24-chr17_2761_2780_2790	NP_872579-AN1-24-chr17-65955991-65959448-stop2813-whim12
ACTN4_1		NaN													ACTN4_1	ACTN4	ACTN4_1	ACTN4_1	NP_004915-AN1-18-chr19_780_781_791	NP_004915-AN1-18-chr19-39217743-39218955-stop866-whim12
NFIA		-0.141									-0.21	-0.072			NFIA	NFIA	NFIA	NFIA	NP_001138984-AN1-8-chr1_404_407_418	NP_001138984-AN1-8-chr1-61849037-61851542-stop436-whim2
KDM1B_1		0.0185									-0.189	0.011	0.025	0.227	KDM1B_1	KDM1B	KDM1B_1	KDM1B_1	NP_694587-AN1-6-chr6_192_240_250	NP_694587-AN1-6-chr6-18186041-18188022-stop279-whim12
VPS13D		-0.1055											-0.116	-0.095	VPS13D	VPS13D	VPS13D	VPS13D	NP_056193-AN1-38-chr1_2851_2835_2851	NP_056193-AN1-38-chr1-12395884-12401839-stop2907-whim12
LMNB1		NaN													LMNB1	LMNB1	LMNB1	LMNB1	NP_005564-AN1-3-chr5_215_210_219	NP_005564-AN1-3-chr5-126141388-126145874-stop272-whim12
VCL		-0.015									-0.018	-0.012			VCL	VCL	VCL	VCL	NP_054706-A-6-9_262_247_262	NP_054706-A-6-9-chr10-75834661-75848953-239-stop334-whim30
LSP1		0.2075											0.113	0.302	LSP1	LSP1	LSP1	LSP1	NP_001229861-A-2-4_193_189_200	NP_001229861-A-2-4-chr11-1901454-1904648-165-whim2
ATP6V1B2		0.0095											0.001	0.018	ATP6V1B2	ATP6V1B2	ATP6V1B2	ATP6V1B2	NP_001684-AN1-11-chr8_388_397_409	NP_001684-AN1-11-chr8-20074006-20074703-stop457-whim2
RPS12		-0.6585									-0.614	-0.703			RPS12	RPS12	RPS12	RPS12	NP_001007-AN1-4-chr6_113_103_113	NP_001007-AN1-4-chr6-133138200-133138588-stop143-whim2
EPB41L1_1		-0.1025									-0.075	-0.13			EPB41L1_1	EPB41L1	EPB41L1_1	EPB41L1_1	NP_036288-A-16-19_757_739_759	NP_036288-A-16-19-chr20-34802362-34809785-171-whim2
TMED9		-0.2535									-0.155	-0.352			TMED9	TMED9	TMED9	TMED9	NP_059980-AN1-3-chr5_138_152_160	NP_059980-AN1-3-chr5-177020776-177021160-stop190-whim12
SLC35A2		0.001					0.092	-0.09							SLC35A2	SLC35A2	SLC35A2	SLC35A2	NP_001027460-AN2-2-chrX_143_304_314	NP_001027460-AN2-2-chrX-48762537-48763668-stop320-whim6
FLYWCH1		-0.0805									-0.075	-0.086			FLYWCH1	FLYWCH1	FLYWCH1	FLYWCH1	NP_115672-AN1-1-chr16_110_106_118	NP_115672-AN1-1-chr16-2980011-2980410-stop371-whim12
C11orf84		0.209							0.166	0.252					C11orf84	C11orf84	C11orf84	C11orf84	NP_612480-AN1-5-chr11_312_316_328	NP_612480-AN1-5-chr11-63586474-63594437-stop343-whim12
ZC3H14		0.0495									0.095	0.004			ZC3H14	ZC3H14	ZC3H14	ZC3H14	NP_079100-A-8-10_375_369_379	NP_079100-A-8-10-chr14-89042284-89063077-156-variant-whim30
TCOF1		0.09375					0.108	0.175	0.035	0.057					TCOF1	TCOF1	TCOF1	TCOF1	NP_001182070-AN1-17-chr5_955_970_978	NP_001182070-AN1-17-chr5-149759295-149762609-stop1044-whim2
QKI		NaN													QKI	QKI	QKI	QKI	NP_996735-AN1-5-chr6_213_211_219	NP_996735-AN1-5-chr6-163983101-163984475-stop319-whim12
REPS2		0.1955									0.234	0.157			REPS2	REPS2	REPS2	REPS2	NP_004717-A-11-14_447_439_447	NP_004717-A-11-14-chrX-17088116-17121840-183-whim12
HGS		-0.829							-1.058	-0.6					HGS	HGS	HGS	HGS	NP_004703-AN1-12-chr17_326_292_326	NP_004703-AN1-12-chr17-79661883-79661989-stop380-whim30
CSE1L		0.2295					0.576	0.551	-0.259	0.05					CSE1L	CSE1L	CSE1L	CSE1L	NP_001307-AN1-3-chr20_111_110_122	NP_001307-AN1-3-chr20-47682830-47682988-stop134-whim2
MLLT4	0.132985	0.20075	15.4789	-0.3455	0.0283208	-2.93636			0.306	0.441	0.042	0.014			MLLT4	MLLT4	MLLT4	MLLT4	NP_001035089-AN1-2-chr6_102_91_103	NP_001035089-AN1-2-chr6-168265426-168271062-stop144-whim12
MTCH2		-0.1785					-0.17	-0.187							MTCH2	MTCH2	MTCH2	MTCH2	NP_055157-A-9-11_94_91_102	NP_055157-A-9-11-chr11-47656286-47660250-27-whim12
RAB19		-0.297							-0.449	-0.145					RAB19	RAB19	RAB19	RAB19	NP_001008749-AN1-1-chr7_68_68_76	NP_001008749-AN1-1-chr7-140107647-140111679-stop129-whim2
PPA2		-0.0875											0.076	-0.251	PPA2	PPA2	PPA2	PPA2	NP_789845-A-8-11_75_74_85	NP_789845-A-8-11-chr4-106367659-106377837-99-whim2
SEC31A_1		0.4585					0.433	0.484							SEC31A_1	SEC31A	SEC31A_1	SEC31A_1	NP_001070676-AN2-8-chr4_835_826_835	NP_001070676-AN2-8-chr4-83766447-83769956-stop836-whim12
GOLGA3	0.451949	0.06175	6.45941	-0.1555	0.225975	-1.36037	0.089	0.19					-0.021	-0.011	GOLGA3	GOLGA3	GOLGA3	GOLGA3	NP_005886-A-21-23_46_43_55	NP_005886-A-21-23-chr12-133390005-133398581-273-whim2
KLC1		0.04					0.073	0.007							KLC1	KLC1	KLC1	KLC1	NP_891553-AN1-12-chr14_551_553_560	NP_891553-AN1-12-chr14-104145882-104159889-stop572-whim12
NCOR2		0.6945											1.088	0.301	NCOR2	NCOR2	NCOR2	NCOR2	NP_006303-AN2-6-chr12_2252_2245_2252	NP_006303-AN2-6-chr12-124817011-124817675-stop2297-whim12
ESPN		0.0015									-0.091	0.094			ESPN	ESPN	ESPN	ESPN	NP_113663-AN1-10-chr1_776_1058_1067	NP_113663-AN1-10-chr1-6512156-6514493-stop1363-whim2
ANLN		NaN													ANLN	ANLN	ANLN	ANLN	NP_061155-AN1-20-chr7_962_970_979	NP_061155-AN1-20-chr7-36466637-36467915-stop987-whim12
EFCAB4A_1		NaN													EFCAB4A_1	EFCAB4A	EFCAB4A_1	EFCAB4A_1	NP_775855-AN1-3-chr11_153_243_256	NP_775855-AN1-3-chr11-829540-829967-stop295-whim2
UCHL5		NaN													UCHL5	UCHL5	UCHL5	UCHL5	NP_057068-AN2-7-chr1_147_146_153	NP_057068-AN2-7-chr1-192998436-192998517-stop329-whim2
PATL1		-0.0955									-0.141	-0.05			PATL1	PATL1	PATL1	PATL1	NP_689929-A-12-14_242_232_246	NP_689929-A-12-14-chr11-59423213-59423971-90-whim12
KIF1B		NaN													KIF1B	KIF1B	KIF1B	KIF1B	NP_904325-AN1-11-chr1_388_379_390	NP_904325-AN1-11-chr1-10338186-10342379-stop466-whim12
ACTG1	0.0742496	0.024	20.8355	-0.769	0.00824995	-3.99636			0.672	0.145	-0.373	-0.348			ACTG1	ACTG1	ACTG1	ACTG1	NP_001605-AN2-3-chr17_269_257_284	NP_001605-AN2-3-chr17-79478085-79478213-stop309-whim30
GRK5		-0.37									-0.451	-0.289			GRK5	GRK5	GRK5	GRK5	NP_005299-A-6-9_179_179_186	NP_005299-A-6-9-chr10-121184597-121196162-205-stop195-whim30
SARS		-0.1175					-0.052	-0.183							SARS	SARS	SARS	SARS	NP_006504-AN1-9-chr1_420_432_440	NP_006504-AN1-9-chr1-109779170-109779426-stop517-whim12
KLC1_1		0.0125					0.078	-0.053							KLC1_1	KLC1	KLC1_1	KLC1_1	NP_891553-AN1-11-chr14_497_498_505	NP_891553-AN1-11-chr14-104143860-104145645-stop601-whim12
XYLB		-0.0895							-0.132	-0.047					XYLB	XYLB	XYLB	XYLB	NP_005099-AN1-2-chr3_48_42_66	NP_005099-AN1-2-chr3-38390123-38397232-stop67-whim30
WDR45B		0.71775									-0.116	-0.184	0.869	2.302	WDR45B	WDR45B	WDR45B	WDR45B	NP_062559-AN2-5-chr17_209_212_231	NP_062559-AN2-5-chr17-80576957-80579484-stop244-whim12
HYOU1		-0.09925									-0.224	-0.033	-0.042	-0.098	HYOU1	HYOU1	HYOU1	HYOU1	NP_006380-AN2-8-chr11_752_739_756	NP_006380-AN2-8-chr11-118919077-118919187-stop767-whim2
UBE2K		NaN													UBE2K	UBE2K	UBE2K	UBE2K	NP_005330-AN1-2-chr4_54_62_79	NP_005330-AN1-2-chr4-39739133-39744911-stop89-whim2
IGBP1	0.217013	-0.13325	11.7842	0.2615	0.0663094	2.27605			-0.244	-0.284			-0.053	0.048	IGBP1	IGBP1	IGBP1	IGBP1	NP_001542-A-1-3_63_52_63	NP_001542-A-1-3-chrX-69353985-69366482-294-whim30
IL17RE	0.790254	-0.044	1.71962	-0.09	0.673035	-0.444976	-0.278	0.28			-0.14	-0.038			IL17RE	IL17RE	IL17RE	IL17RE	NP_001180309-AN1-13-chr3_433_600_614	NP_001180309-AN1-13-chr3-9955708-9956085-stop717-whim2
TRAF5		0.13					0.222	0.038							TRAF5	TRAF5	TRAF5	TRAF5	NP_004610-A-3-7_128_120_128	NP_004610-A-3-7-chr1-211529810-211538717-318-whim2
LDHA		0.1495					0.263	0.28	0.144	-0.089					LDHA	LDHA	LDHA	LDHA	NP_001158886-AN1-2-chr11_72_80_91	NP_001158886-AN1-2-chr11-18418515-18424415-stop143-whim2
ADAT1		0.334					0.265	0.403							ADAT1	ADAT1	ADAT1	ADAT1	NP_036223-A-2-5_349_344_353	NP_036223-A-2-5-chr16-75637069-75646140-246-variant-whim30
TCF25		-0.547					-0.45	-0.644							TCF25	TCF25	TCF25	TCF25	NP_055787-A-15-17_574_582_593	NP_055787-A-15-17-chr16-89972692-89976998-80-stop643-whim2
PSMC1		0.05							-0.007	0.107					PSMC1	PSMC1	PSMC1	PSMC1	NP_002793-AN1-10-chr14_397_388_397	NP_002793-AN1-10-chr14-90736696-90738629-stop400-whim2
KDM8		-0.0555									0.006	-0.117			KDM8	KDM8	KDM8	KDM8	NP_001138820-A-4-6_305_300_309	NP_001138820-A-4-6-chr16-27226329-27230281-45-whim12
PAK2		0.0455											0.152	-0.061	PAK2	PAK2	PAK2	PAK2	NP_002568-AN1-1-chr3_64_63_70	NP_002568-AN1-1-chr3-196509704-196510260-stop94-whim2
RPLP0		-0.246									-0.093	-0.399			RPLP0	RPLP0	RPLP0	RPLP0	NP_444505-AN2-5-chr12_108_107_120	NP_444505-AN2-5-chr12-120636761-120636920-stop304-whim2
TASP1	0.12576	-0.166	16.3285	0.397	0.023289	3.09502	-0.307	-0.422			-0.061	0.126			TASP1	TASP1	TASP1	TASP1	NP_060184-AN2-11-chr20_95_76_97	NP_060184-AN2-11-chr20-13600402-13604092-stop115-whim2
HEATR2		0.035					-0.009	0.079							HEATR2	HEATR2	HEATR2	HEATR2	NP_060272-AN1-12-chr7_811_879_892	NP_060272-AN1-12-chr7-819781-821681-stop1170-whim2
TNFRSF21		0.014									-0.022	0.05			TNFRSF21	TNFRSF21	TNFRSF21	TNFRSF21	NP_055267-AN2-4-chr6_416_433_446	NP_055267-AN2-4-chr6-47244004-47251673-stop450-whim30
NUP133	0.790254	-0.1225	1.98102	-0.058	0.633721	-0.503648	-0.053	-0.134					-0.113	-0.19	NUP133	NUP133	NUP133	NUP133	NP_060700-AN2-6-chr1_994_1015_1022	NP_060700-AN2-6-chr1-229588601-229593907-stop1034-whim30
LGALS1		0.0355									0.076	-0.005			LGALS1	LGALS1	LGALS1	LGALS1	NP_002296-AN1-2-chr22_31_30_40	NP_002296-AN1-2-chr22-38073072-38074516-stop115-whim2
RASGEF1B		-0.296									-0.258	-0.334			RASGEF1B	RASGEF1B	RASGEF1B	RASGEF1B	NP_689758-AN2-11-chr4_147_141_151	NP_689758-AN2-11-chr4-82373589-82377804-stop155-whim30
TLE2	0.0416527	-0.069	25.6868	0.995	0.00269971	5.11189	-0.811	-0.322					0.318	0.539	TLE2	TLE2	TLE2	TLE2	NP_001138233-AN2-16-chr19_92_132_155	NP_001138233-AN2-16-chr19-3025105-3027826-stop220-whim12
DLEC1		-0.98825					-1.801	-1.143	-0.322	-0.687					DLEC1	DLEC1	DLEC1	DLEC1	NP_031361-AN1-22-chr3_1088_1103_1114	NP_031361-AN1-22-chr3-38151053-38151580-stop1207-whim30
DGKD		0.313											0.284	0.342	DGKD	DGKD	DGKD	DGKD	NP_690618-AN1-15-chr2_631_630_642	NP_690618-AN1-15-chr2-234358022-234358604-stop1223-whim2
ULK2		-0.4005					-0.398	-0.403							ULK2	ULK2	ULK2	ULK2	NP_001136082-AN2-18-chr17_263_273_282	NP_001136082-AN2-18-chr17-19729525-19741813-stop285-whim6
BRE		0.071											-0.053	0.195	BRE	BRE	BRE	BRE	NP_004890-AN1-6-chr2_227_239_248	NP_004890-AN1-6-chr2-28352247-28375342-stop249-whim2
TTYH3		0.18925									-0.169	0.07	0.216	0.64	TTYH3	TTYH3	TTYH3	TTYH3	NP_079526-AN1-8-chr7_310_330_341	NP_079526-AN1-8-chr7-2691876-2695746-stop345-whim2
ZFYVE27	0.305516	0.00925	9.80188	0.2725	0.104668	1.93488	0.016	-0.27			0.178	0.113			ZFYVE27	ZFYVE27	ZFYVE27	ZFYVE27	NP_001167590-A-1-3_58_46_58	NP_001167590-A-1-3-chr10-99498406-99508025-187-stop59-whim12
DSN1		-0.475									-0.524	-0.426			DSN1	DSN1	DSN1	DSN1	NP_079194-A-6-9_119_109_127	NP_079194-A-6-9-chr20-35390951-35399275-147-whim2
POU2F3	0.0135673	0.77225	35.4662	-2.0465	0.000284041	-8.02345	2.009	1.582					0.069	-0.571	POU2F3	POU2F3	POU2F3	POU2F3	NP_001231611-AN1-3-chr11_47_63_74	NP_001231611-AN1-3-chr11-120139953-120156104-stop92-whim2
CCDC125		-0.331							-0.246	-0.416					CCDC125	CCDC125	CCDC125	CCDC125	NP_789786-AN2-7-chr5_207_207_220	NP_789786-AN2-7-chr5-68599771-68602643-stop517-whim12
GAPDH_1		-0.092											0.002	-0.186	GAPDH_1	GAPDH	GAPDH_1	GAPDH_1	NP_001243728-AN1-1-chr12_2_77_97	NP_001243728-AN1-1-chr12-6645759-6645850-stop294-whim12
NID2		0.178							0.17	0.186					NID2	NID2	NID2	NID2	NP_031387-A-10-12_844_840_852	NP_031387-A-10-12-chr14-52486896-52495439-144-variant-whim12
CCT5		-0.0525											-0.055	-0.05	CCT5	CCT5	CCT5	CCT5	NP_036205-A-2-4_56_50_71	NP_036205-A-2-4-chr5-10254317-10256066-165-whim12
SERBP1		NaN													SERBP1	SERBP1	SERBP1	SERBP1	NP_001018079-A-4-6_203_202_228	NP_001018079-A-4-6-chr1-67889960-67890765-90-variant-whim4
CHI3L1		-0.007									-0.178	0.164			CHI3L1	CHI3L1	CHI3L1	CHI3L1	NP_001267-A-2-4_238_225_243	NP_001267-A-2-4-chr1-203149005-203150289-183-whim12
COL12A1		-0.2375									-0.036	-0.439			COL12A1	COL12A1	COL12A1	COL12A1	NP_004361-A-53-55_813_788_814	NP_004361-A-53-55-chr6-75875495-75887378-273-variant-whim12
C19orf33		NaN													C19orf33	C19orf33	C19orf33	C19orf33	NP_277055-AN1-2-chr19_47_68_82	NP_277055-AN1-2-chr19-38795130-38795204-stop86-whim2
ESPN_1		NaN													ESPN_1	ESPN	ESPN_1	ESPN_1	NP_113663-A-8-11_639_640_651	NP_113663-A-8-11-chr1-6509151-6517243-410-stop697-whim6
EXOSC2		NaN													EXOSC2	EXOSC2	EXOSC2	EXOSC2	NP_055100-AN1-4-chr9_120_104_120	NP_055100-AN1-4-chr9-133573638-133574689-stop121-whim30
RNF213		0.0835											0.377	-0.21	RNF213	RNF213	RNF213	RNF213	NP_001243000-AN1-2-chr17_88_81_115	NP_001243000-AN1-2-chr17-78247203-78252562-stop192-whim12
RHOT2		0.0655									0.094	0.037			RHOT2	RHOT2	RHOT2	RHOT2	NP_620124-AN1-9-chr16_214_195_215	NP_620124-AN1-9-chr16-720773-720888-stop315-whim2
MFGE8		-0.449									-0.42	-0.478			MFGE8	MFGE8	MFGE8	MFGE8	NP_001108086-AN2-3-chr15_230_257_264	NP_001108086-AN2-3-chr15-89444917-89448987-stop304-whim2
FBRSL1		NaN													FBRSL1	FBRSL1	FBRSL1	FBRSL1	NP_001136113-AN1-11-chr12_529_529_537	NP_001136113-AN1-11-chr12-133149208-133150675-stop592-whim12
GSN		0.359					0.491	0.227							GSN	GSN	GSN	GSN	NP_001121135-AN1-1-chr9_34_40_59	NP_001121135-AN1-1-chr9-124044828-124064201-stop117-whim12
PYGB		0.0275									0.04	0.015			PYGB	PYGB	PYGB	PYGB	NP_002853-AN1-4-chr20_177_198_211	NP_002853-AN1-4-chr20-25252122-25255212-stop279-whim30
NIPAL2		-0.469											-0.366	-0.572	NIPAL2	NIPAL2	NIPAL2	NIPAL2	NP_079035-A-3-5_295_342_362	NP_079035-A-3-5-chr8-99207050-99215335-64-stop372-whim2
WNK2		-0.0455											0.207	-0.298	WNK2	WNK2	WNK2	WNK2	NP_006639-AN1-20-chr9_1646_1633_1650	NP_006639-AN1-20-chr9-96052329-96054592-stop1706-whim2
GSTP1_2		NaN													GSTP1_2	GSTP1	GSTP1_2	GSTP1_2	NP_000843-A-2-5_14_13_36	NP_000843-A-2-5-chr11-67351640-67352608-195-whim12
ANKHD1-EIF4EBP3		NaN													ANKHD1-EIF4EBP3	ANKHD1	ANKHD1-EIF4EBP3	ANKHD1-EIF4EBP3	NP_065741-AN1-2-chr5_154_146_159	NP_065741-AN1-2-chr5-139815842-139818087-stop205-whim12
EPB41L3		NaN													EPB41L3	EPB41L3	EPB41L3	EPB41L3	NP_036439-A-5-7_784_770_784	NP_036439-A-5-7-chr18-5397425-5406775-123-whim30
ZNF462		NaN													ZNF462	ZNF462	ZNF462	ZNF462	NP_067047-AN1-3-chr9_2005_2005_2022	NP_067047-AN1-3-chr9-109692970-109694543-stop2113-whim12
SUV420H2		0.0465											0.024	0.069	SUV420H2	SUV420H2	SUV420H2	SUV420H2	NP_116090-AN1-6-chr19_236_226_236	NP_116090-AN1-6-chr19-55857717-55857872-stop237-whim2
SUN2		-0.1215											0.024	-0.267	SUN2	SUN2	SUN2	SUN2	NP_056189-A-14-16_97_84_108	NP_056189-A-14-16-chr22-39146325-39147214-138-variant-whim2
NASP		-0.1845									-0.301	-0.068			NASP	NASP	NASP	NASP	NP_002473-A-12-14_694_672_694	NP_002473-A-12-14-chr1-46082065-46083134-78-whim2
RB1		NaN													RB1	RB1	RB1	RB1	NP_000312-A-13-15_445_433_448	NP_000312-A-13-15-chr13-48951170-48954188-57-whim6
HOOK3		0.031											-0.007	0.069	HOOK3	HOOK3	HOOK3	HOOK3	NP_115786-AN1-2-chr8_49_55_66	NP_115786-AN1-2-chr8-42761401-42780681-stop93-whim2
CC2D1A		0.338					0.209	0.467							CC2D1A	CC2D1A	CC2D1A	CC2D1A	NP_060191-AN1-23-chr19_819_806_823	NP_060191-AN1-23-chr19-14038843-14038939-stop846-whim12
ADD1		0.1775					0.003	0.352							ADD1	ADD1	ADD1	ADD1	NP_789771-AN1-11-chr4_567_563_591	NP_789771-AN1-11-chr4-2910331-2911065-stop641-whim12
NPEPL1		0.1195											0.138	0.101	NPEPL1	NPEPL1	NPEPL1	NPEPL1	NP_078939-AN1-8-chr20_334_358_369	NP_078939-AN1-8-chr20-57287635-57288406-stop415-whim30
KIAA1217		NaN													KIAA1217	KIAA1217	KIAA1217	KIAA1217	NP_062536-A-16-18_1139_1133_1148	NP_062536-A-16-18-chr10-24822166-24831621-120-variant-whim6
ZFAND1		0.1975									0.349	0.046			ZFAND1	ZFAND1	ZFAND1	ZFAND1	NP_001164267-A-4-7_32_19_32	NP_001164267-A-4-7-chr8-82627130-82630416-168-stop33-whim2
LTBR		-0.232											-0.18	-0.284	LTBR	LTBR	LTBR	LTBR	NP_002333-A-6-8_224_212_227	NP_002333-A-6-8-chr12-6495610-6497965-108-variant-whim2
PLAA		0.0025					0.067	-0.062							PLAA	PLAA	PLAA	PLAA	NP_001026859-A-4-6_474_457_476	NP_001026859-A-4-6-chr9-26913945-26919307-69-whim12
HMGN2		-0.0795							0.061	-0.22					HMGN2	HMGN2	HMGN2	HMGN2	NP_005508-AN1-4-chr1_48_64_75	NP_005508-AN1-4-chr1-26800626-26801065-stop83-whim2
SLAIN2		0.15											0.106	0.194	SLAIN2	SLAIN2	SLAIN2	SLAIN2	NP_065897-AN1-6-chr4_454_470_478	NP_065897-AN1-6-chr4-48385801-48396592-stop495-whim12
EPB41_1		NaN													EPB41_1	EPB41	EPB41_1	EPB41_1	NP_001159477-AN1-10-chr1_548_542_553	NP_001159477-AN1-10-chr1-29365938-29379618-stop630-whim12
GOLGA4		-0.0625									-0.066	-0.059			GOLGA4	GOLGA4	GOLGA4	GOLGA4	NP_001166184-AN1-13-chr3_539_565_573	NP_001166184-AN1-13-chr3-37360685-37369910-stop578-whim2
TUBB2A		NaN													TUBB2A	TUBB2A	TUBB2A	TUBB2A	NP_001060-AN2-2-chr6_93_78_93	NP_001060-AN2-2-chr6-3155290-3155858-stop94-whim12
RPRD2		NaN													RPRD2	RPRD2	RPRD2	RPRD2	NP_056018-A-3-5_146_143_151	NP_056018-A-3-5-chr1-150413499-150415706-78-whim12
RND3		-0.7425							-0.773	-0.712					RND3	RND3	RND3	RND3	NP_001241667-AN2-3-chr2_117_116_127	NP_001241667-AN2-3-chr2-151328269-151331388-stop243-whim2
LTBP2		0.0665									0.027	0.106			LTBP2	LTBP2	LTBP2	LTBP2	NP_000419-A-16-19_971_966_977	NP_000419-A-16-19-chr14-74976562-74983524-243-whim6
ACAT1		0.517									0.685	0.349			ACAT1	ACAT1	ACAT1	ACAT1	NP_000010-A-3-5_81_79_92	NP_000010-A-3-5-chr11-108004664-108005868-96-whim12
MYO6_2		0.3415									0.256	0.427			MYO6_2	MYO6	MYO6_2	MYO6_2	NP_004990-A-28-30_1047_1044_1054	NP_004990-A-28-30-chr6-76604977-76617321-39-whim12
PALLD_1		NaN													PALLD_1	PALLD	PALLD_1	PALLD_1	NP_057165-A-10-13_701_690_705	NP_057165-A-10-13-chr4-169812208-169824907-321-whim12
SVIL		0.149					0.155	0.143							SVIL	SVIL	SVIL	SVIL	NP_068506-A-30-32_303_289_304	NP_068506-A-30-32-chr10-29821101-29824917-930-variant-whim12
STRN3		NaN													STRN3	STRN3	STRN3	STRN3	NP_001077362-A-10-12_330_322_333	NP_001077362-A-10-12-chr14-31388312-31404368-111-whim12
TARDBP		NaN													TARDBP	TARDBP	TARDBP	TARDBP	NP_031401-AN1-1-chr1_80_94_105	NP_031401-AN1-1-chr1-11074022-11075580-stop139-whim2
EIF2S3		NaN													EIF2S3	EIF2S3	EIF2S3	EIF2S3	NP_001406-AN1-9-chrX_338_352_378	NP_001406-AN1-9-chrX-24086225-24089677-stop399-whim2
FAM118A		0.605											0.139	1.071	FAM118A	FAM118A	FAM118A	FAM118A	NP_001098065-AN1-1-chr22_16_85_97	NP_001098065-AN1-1-chr22-45718307-45719052-stop120-whim12
PPP1R1B		0.7805					1.002	0.559							PPP1R1B	PPP1R1B	PPP1R1B	PPP1R1B	NP_115568-A-2-5_48_41_51	NP_115568-A-2-5-chr17-37785483-37790135-99-whim2
HMGA2		0.0975					0.168	0.027							HMGA2	HMGA2	HMGA2	HMGA2	NP_003474-AN1-4-chr12_95_103_115	NP_003474-AN1-4-chr12-66345195-66346135-stop119-whim12
FUBP3		NaN													FUBP3	FUBP3	FUBP3	FUBP3	NP_003925-AN1-2-chr9_64_58_74	NP_003925-AN1-2-chr9-133470975-133485343-stop85-whim12
CC2D1A_1		NaN													CC2D1A_1	CC2D1A	CC2D1A_1	CC2D1A_1	NP_060191-AN1-12-chr19_453_453_463	NP_060191-AN1-12-chr19-14030764-14031372-stop577-whim12
TOM1L1		NaN													TOM1L1	TOM1L1	TOM1L1	TOM1L1	NP_005477-AN1-3-chr17_75_87_94	NP_005477-AN1-3-chr17-52982928-52991120-stop154-whim2
MAOB		0.0365									0.071	0.002			MAOB	MAOB	MAOB	MAOB	NP_000889-A-3-5_380_371_392	NP_000889-A-3-5-chrX-43628665-43637928-98-stop428-whim2
NDUFV2		NaN													NDUFV2	NDUFV2	NDUFV2	NDUFV2	NP_066552-AN1-6-chr18_194_199_208	NP_066552-AN1-6-chr18-9124981-9126831-stop225-whim2
SIVA1		-0.167					-0.125	-0.209							SIVA1	SIVA1	SIVA1	SIVA1	NP_006418-AN1-2-chr14_105_120_127	NP_006418-AN1-2-chr14-105222161-105222955-stop155-whim2
RFC3		0.7435											0.604	0.883	RFC3	RFC3	RFC3	RFC3	NP_853536-AN1-4-chr13_132_137_144	NP_853536-AN1-4-chr13-34400023-34403990-stop195-whim2
SEC24C		NaN													SEC24C	SEC24C	SEC24C	SEC24C	NP_004913-AN1-5-chr10_330_320_339	NP_004913-AN1-5-chr10-75520607-75521855-stop367-whim12
NFATC2IP		NaN													NFATC2IP	NFATC2IP	NFATC2IP	NFATC2IP	NP_116204-A-3-5_194_188_197	NP_116204-A-3-5-chr16-28966003-28967471-81-whim12
CCT5_1		NaN													CCT5_1	CCT5	CCT5_1	CCT5_1	NP_036205-AN1-4-chr5_178_211_218	NP_036205-AN1-4-chr5-10256265-10258198-stop264-whim2
WDR37		NaN													WDR37	WDR37	WDR37	WDR37	NP_054742-AN1-8-chr10_243_280_295	NP_054742-AN1-8-chr10-1142186-1149538-stop345-whim12
AGRN		0.102											0.168	0.036	AGRN	AGRN	AGRN	AGRN	NP_940978-AN1-21-chr1_1212_1202_1213	NP_940978-AN1-21-chr1-983067-983161-stop1332-whim2
TNC_2		0.43									0.376	0.484			TNC_2	TNC	TNC_2	TNC_2	NP_002151-A-11-19_1072_1069_1077	NP_002151-A-11-19-chr9-117804620-117835881-1911-variant-whim6
ABI2		-0.76											-0.446	-1.074	ABI2	ABI2	ABI2	ABI2	NP_005750-A-4-6_188_184_200	NP_005750-A-4-6-chr2-204255866-204260378-147-whim12
BCAS3		0.3275									0.262	0.393			BCAS3	BCAS3	BCAS3	BCAS3	NP_001092902-AN1-23-chr17_880_888_895	NP_001092902-AN1-23-chr17-59445855-59465978-stop911-whim2
HINT2		0.0005							0.04	-0.039					HINT2	HINT2	HINT2	HINT2	NP_115982-A-2-4_75_63_84	NP_115982-A-2-4-chr9-35813335-35813640-105-whim6
FASN		-0.7715									-0.725	-0.818			FASN	FASN	FASN	FASN	NP_004095-A-5-7_2136_2126_2143	NP_004095-A-5-7-chr17-80038798-80039476-189-whim30
PLOD1		-0.2535							-0.03	-0.477					PLOD1	PLOD1	PLOD1	PLOD1	NP_000293-AN1-7-chr1_249_248_257	NP_000293-AN1-7-chr1-12017071-12017904-stop281-whim12
MTDH		-0.0555									-0.083	-0.028			MTDH	MTDH	MTDH	MTDH	NP_848927-A-9-11_461_452_463	NP_848927-A-9-11-chr8-98725997-98735106-141-whim12
KAL1		-0.125											-0.141	-0.109	KAL1	KAL1	KAL1	KAL1	NP_000207-AN2-7-chrX_403_412_419	NP_000207-AN2-7-chrX-8534250-8536272-stop420-whim30
FAM168B		NaN													FAM168B	FAM168B	FAM168B	FAM168B	NP_001009993-A-3-5_24_19_32	NP_001009993-A-3-5-chr2-131813268-131840149-84-whim2
HNRNPA3_1		-0.05											-0.23	0.13	HNRNPA3_1	HNRNPA3	HNRNPA3_1	HNRNPA3_1	NP_919223-AN1-6-chr2_248_247_256	NP_919223-AN1-6-chr2-178081499-178081590-stop283-whim2
ATP11A		-0.1415					0.016	-0.299							ATP11A	ATP11A	ATP11A	ATP11A	NP_115565-AN1-28-chr13_1110_1108_1117	NP_115565-AN1-28-chr13-113530255-113536126-stop1193-whim12
PRRC2B		-0.0745							-0.068	-0.081					PRRC2B	PRRC2B	PRRC2B	PRRC2B	NP_037450-AN1-19-chr9_1662_1648_1664	NP_037450-AN1-19-chr9-134357195-134357760-stop1768-whim12
KRT18		NaN													KRT18	KRT18	KRT18	KRT18	NP_000215-AN1-5-chr12_317_315_324	NP_000215-AN1-5-chr12-53345640-53345905-stop393-whim2
ABCD1		0.006									-0.012	0.024			ABCD1	ABCD1	ABCD1	ABCD1	NP_000024-AN1-4-chrX_466_521_535	NP_000024-AN1-4-chrX-153001967-153002065-stop615-whim2
SMCR7L		-0.5445											-0.197	-0.892	SMCR7L	SMCR7L	SMCR7L	SMCR7L	NP_061881-AN1-2-chr22_108_125_138	NP_061881-AN1-2-chr22-39908031-39908322-stop149-whim12
C1orf112		-0.085											-0.261	0.091	C1orf112	C1orf112	C1orf112	C1orf112	NP_060656-AN1-20-chr1_749_772_787	NP_060656-AN1-20-chr1-169819486-169820945-stop823-whim6
LSM14A		0.3945					0.29	0.499							LSM14A	LSM14A	LSM14A	LSM14A	NP_056393-A-4-6_180_175_184	NP_056393-A-4-6-chr19-34699956-34706500-177-whim12
TULP4		-0.0835					-0.056	-0.111							TULP4	TULP4	TULP4	TULP4	NP_001007467-AN1-12-chr6_673_1436_1444	NP_001007467-AN1-12-chr6-158919844-158922715-stop1553-whim30
SH3GLB2		-0.084							-0.108	-0.06					SH3GLB2	SH3GLB2	SH3GLB2	SH3GLB2	NP_064530-A-4-6_209_199_214	NP_064530-A-4-6-chr9-131772488-131774514-24-whim12
EHMT1		NaN													EHMT1	EHMT1	EHMT1	EHMT1	NP_079033-AN1-4-chr9_276_272_279	NP_079033-AN1-4-chr9-140622981-140637846-stop342-whim2
NUP214		0.04					0.025	0.055							NUP214	NUP214	NUP214	NUP214	NP_005076-AN1-13-chr9_649_641_651	NP_005076-AN1-13-chr9-134021691-134022873-stop736-whim12
RFC3_1		NaN													RFC3_1	RFC3	RFC3_1	RFC3_1	NP_853536-AN1-8-chr13_293_278_293	NP_853536-AN1-8-chr13-34409354-34516389-stop294-whim2
CALR		NaN													CALR	CALR	CALR	CALR	NP_004334-A-2-4_66_65_74	NP_004334-A-2-4-chr19-13050049-13050866-204-whim12
PRRC2B_1		0.5835											0.446	0.721	PRRC2B_1	PRRC2B	PRRC2B_1	PRRC2B_1	NP_037450-AN1-9-chr9_404_511_522	NP_037450-AN1-9-chr9-134330553-134334556-stop535-whim12
MICAL2		0.3845							0.145	0.624					MICAL2	MICAL2	MICAL2	MICAL2	NP_055447-A-20-22_950_945_953	NP_055447-A-20-22-chr11-12270793-12278331-108-whim12
SORBS2		0.015									-0.051	0.081			SORBS2	SORBS2	SORBS2	SORBS2	NP_003594-A-10-12_303_293_312	NP_003594-A-10-12-chr4-186551752-186559232-57-whim2
SPTBN1		NaN													SPTBN1	SPTBN1	SPTBN1	SPTBN1	NP_003119-AN1-31-chr2_2140_2124_2140	NP_003119-AN1-31-chr2-54887136-54889467-stop2141-whim30
CNST		NaN													CNST	CNST	CNST	CNST	NP_001132931-A-1-3_127_130_137	NP_001132931-A-1-3-chr1-246755243-246795195-206-stop138-whim12
PLEKHG3		-0.032											-0.179	0.115	PLEKHG3	PLEKHG3	PLEKHG3	PLEKHG3	NP_056364-AN1-9-chr14_395_402_409	NP_056364-AN1-9-chr14-65199619-65203002-stop442-whim2
SLTM		NaN													SLTM	SLTM	SLTM	SLTM	NP_079031-A-16-19_107_106_114	NP_079031-A-16-19-chr15-59193486-59209133-246-whim12
CAD		0.0495											0.013	0.086	CAD	CAD	CAD	CAD	NP_004332-AN1-35-chr2_1866_1858_1876	NP_004332-AN1-35-chr2-27463229-27463434-stop1898-whim12
ATXN2L_2		NaN													ATXN2L_2	ATXN2L	ATXN2L_2	ATXN2L_2	NP_680781-AN1-18-chr16_812_937_948	NP_680781-AN1-18-chr16-28846014-28846402-stop1045-whim2
KIF20A		NaN													KIF20A	KIF20A	KIF20A	KIF20A	NP_005724-AN1-12-chr5_562_581_588	NP_005724-AN1-12-chr5-137520365-137520498-stop608-whim2
SNRPD3		0.103					0.113	0.093							SNRPD3	SNRPD3	SNRPD3	SNRPD3	NP_004166-AN1-1-chr22_43_76_84	NP_004166-AN1-1-chr22-24953768-24963933-stop136-whim2
MPDZ		0.0805											0.05	0.111	MPDZ	MPDZ	MPDZ	MPDZ	NP_001248335-A-20-22_1211_1208_1221	NP_001248335-A-20-22-chr9-13140148-13150509-111-variant-whim6
DDX1		-0.107									-0.157	-0.057			DDX1	DDX1	DDX1	DDX1	NP_004930-AN1-16-chr2_403_408_418	NP_004930-AN1-16-chr2-15758394-15760373-stop453-whim4
ACBD4		NaN													ACBD4	ACBD4	ACBD4	ACBD4	NP_001129176-AN1-6-chr17_204_259_270	NP_001129176-AN1-6-chr17-43215197-43215258-stop326-whim2
NPM1		-0.1275									-0.103	-0.152			NPM1	NPM1	NPM1	NPM1	NP_002511-AN1-9-chr5_258_258_266	NP_002511-AN1-9-chr5-170832407-170834132-stop276-whim12
PTMA		-0.3515					-0.4	-0.303							PTMA	PTMA	PTMA	PTMA	NP_001092755-AN1-4-chr2_98_90_98	NP_001092755-AN1-4-chr2-232577226-232577552-stop99-whim12
MFI2		0.1795											0.162	0.197	MFI2	MFI2	MFI2	MFI2	NP_005920-AN2-3-chr3_647_668_679	NP_005920-AN2-3-chr3-196731042-196733419-stop763-whim30
KIAA0922		0.032							0.043	0.021					KIAA0922	KIAA0922	KIAA0922	KIAA0922	NP_001124479-AN1-24-chr4_930_989_1004	NP_001124479-AN1-24-chr4-154524604-154524956-stop1141-whim12
PFKP		-0.1925							-0.25	-0.135					PFKP	PFKP	PFKP	PFKP	NP_002618-AN1-3-chr10_89_90_110	NP_002618-AN1-3-chr10-3141544-3143640-stop128-whim12
SMARCA2		-0.0885											-0.085	-0.092	SMARCA2	SMARCA2	SMARCA2	SMARCA2	NP_620614-AN1-3-chr9_264_274_288	NP_620614-AN1-3-chr9-2039900-2041330-stop289-whim12
IKBKB		-0.291									-0.441	-0.141			IKBKB	IKBKB	IKBKB	IKBKB	NP_001547-AN1-16-chr8_580_602_612	NP_001547-AN1-16-chr8-42179463-42179544-stop623-whim12
USP9X_1		0.2585							0.492	0.025					USP9X_1	USP9X	USP9X_1	USP9X_1	NP_001034679-AN1-20-chrX_1051_1056_1063	NP_001034679-AN1-20-chrX-41031211-41043788-stop1103-whim6
MTMR9		NaN													MTMR9	MTMR9	MTMR9	MTMR9	NP_056273-AN1-3-chr8_140_156_164	NP_056273-AN1-3-chr8-11157657-11162382-stop224-whim6
OPA1		NaN													OPA1	OPA1	OPA1	OPA1	NP_570850-AN1-8-chr3_282_270_283	NP_570850-AN1-8-chr3-193349454-193350253-stop310-whim30
TTYH1		0.1845					0.057	0.312							TTYH1	TTYH1	TTYH1	TTYH1	NP_001005367-AN1-3-chr19_140_163_170	NP_001005367-AN1-3-chr19-54932562-54933372-stop270-whim2
SLC25A14		NaN													SLC25A14	SLC25A14	SLC25A14	SLC25A14	NP_003942-AN1-7-chrX_241_266_275	NP_003942-AN1-7-chrX-129498726-129499520-stop288-whim12
NFYC		NaN													NFYC	NFYC	NFYC	NFYC	NP_001136060-AN1-9-chr1_316_324_334	NP_001136060-AN1-9-chr1-41235087-41236068-stop459-whim12
PTBP1		-0.593									-0.401	-0.785			PTBP1	PTBP1	PTBP1	PTBP1	NP_002810-AN1-7-chr19_240_239_246	NP_002810-AN1-7-chr19-804939-805072-stop369-whim2
ANK2		0.0615					0.034	0.089							ANK2	ANK2	ANK2	ANK2	NP_001139-AN1-45-chr4_3954_3984_3991	NP_001139-AN1-45-chr4-114294605-114295919-stop4016-whim12
PIDD		-0.1605					-0.108	-0.213							PIDD	PIDD	PIDD	PIDD	NP_665893-AN2-15-chr11_100_170_181	NP_665893-AN2-15-chr11-803648-804093-stop182-whim12
UHRF2		NaN													UHRF2	UHRF2	UHRF2	UHRF2	NP_690856-AN1-10-chr9_536_521_536	NP_690856-AN1-10-chr9-6493932-6496959-stop542-whim2
FBXO9		-0.1315					-0.094	-0.169							FBXO9	FBXO9	FBXO9	FBXO9	NP_036479-AN1-3-chr6_114_126_136	NP_036479-AN1-3-chr6-52941341-52943578-stop152-whim30
TMSB10		-0.1395							-0.119	-0.16					TMSB10	TMSB10	TMSB10	TMSB10	NP_066926-AN1-1-chr2_35_54_68	NP_066926-AN1-1-chr2-85133241-85133489-stop69-whim12
SH3KBP1		-0.1115							-0.09	-0.133					SH3KBP1	SH3KBP1	SH3KBP1	SH3KBP1	NP_114098-A-3-5_499_490_503	NP_114098-A-3-5-chrX-19560311-19568091-129-whim12
TMPO_1		NaN													TMPO_1	TMPO	TMPO_1	TMPO_1	NP_001027454-A-4-6_222_217_229	NP_001027454-A-4-6-chr12-98931350-98938219-120-whim2
STRADB		NaN													STRADB	STRADB	STRADB	STRADB	NP_061041-AN1-8-chr2_276_279_296	NP_061041-AN1-8-chr2-202342914-202343091-stop385-whim2
PRPH		0.1325					0.222	0.043							PRPH	PRPH	PRPH	PRPH	NP_006253-AN1-3-chr12_238_258_268	NP_006253-AN1-3-chr12-49690310-49691232-stop296-whim6
CGNL1		0.139					0.271	0.007							CGNL1	CGNL1	CGNL1	CGNL1	NP_001239264-AN1-7-chr15_802_794_807	NP_001239264-AN1-7-chr15-57754090-57770562-stop855-whim12
DNAJA1		-0.2585							-0.104	-0.413					DNAJA1	DNAJA1	DNAJA1	DNAJA1	NP_001530-AN1-1-chr9_45_45_56	NP_001530-AN1-1-chr9-33026614-33026819-stop102-whim2
AHR		0.153											0.265	0.041	AHR	AHR	AHR	AHR	NP_001612-AN1-9-chr7_388_507_524	NP_001612-AN1-9-chr7-17375410-17378810-stop742-whim30
GNL3		0.261							0.309	0.213					GNL3	GNL3	GNL3	GNL3	NP_055181-AN1-8-chr3_261_274_282	NP_055181-AN1-8-chr3-52725087-52726850-stop367-whim30
NDFIP2		NaN													NDFIP2	NDFIP2	NDFIP2	NDFIP2	NP_001154879-AN1-2-chr13_163_192_205	NP_001154879-AN1-2-chr13-80095110-80107463-stop216-whim12
RBMX		NaN													RBMX	RBMX	RBMX	RBMX	NP_001158275-AN2-3-chrX_153_173_180	NP_001158275-AN2-3-chrX-135957322-135957416-stop181-whim2
SPDL1		NaN													SPDL1	SPDL1	SPDL1	SPDL1	NP_060255-AN1-6-chr5_298_311_318	NP_060255-AN1-6-chr5-169021685-169023588-stop340-whim12
IQSEC1		-0.1535											-0.157	-0.15	IQSEC1	IQSEC1	IQSEC1	IQSEC1	NP_001127854-A-2-4_920_914_922	NP_001127854-A-2-4-chr3-12943022-12949848-50-stop923-whim12
TINAGL1		0.1095									-0.066	0.285			TINAGL1	TINAGL1	TINAGL1	TINAGL1	NP_071447-AN1-2-chr1_125_184_210	NP_071447-AN1-2-chr1-32044868-32045888-stop275-whim2
MIB2		0.4295					0.33	0.529							MIB2	MIB2	MIB2	MIB2	NP_543151-AN1-16-chr1_850_951_959	NP_543151-AN1-16-chr1-1564102-1564413-stop979-whim2
TMCO6		NaN													TMCO6	TMCO6	TMCO6	TMCO6	NP_060972-AN1-3-chr5_105_93_105	NP_060972-AN1-3-chr5-140021365-140022075-stop106-whim12
RORA		-0.4025							-0.458	-0.347					RORA	RORA	RORA	RORA	NP_599022-AN2-3-chr15_465_507_520	NP_599022-AN2-3-chr15-60792351-60793157-stop525-whim2
DDO		-0.026							0.077	-0.129					DDO	DDO	DDO	DDO	NP_004023-AN2-2-chr6_124_167_178	NP_004023-AN2-2-chr6-110726147-110729536-stop232-whim30
GAPDH_2		-0.057											-0.154	0.04	GAPDH_2	GAPDH	GAPDH_2	GAPDH_2	NP_002037-AN1-6-chr12_176_146_182	NP_002037-AN1-6-chr12-6646556-6647087-stop183-whim12
C19orf55		NaN													C19orf55	C19orf55	C19orf55	C19orf55	NP_001034976-AN1-8-chr19_320_549_557	NP_001034976-AN1-8-chr19-36257856-36257951-stop677-whim30
ARPC4-TTLL3		NaN													ARPC4-TTLL3	ARPC4	ARPC4-TTLL3	ARPC4-TTLL3	NP_001185722-AN1-4-chr3_111_116_129	NP_001185722-AN1-4-chr3-9843440-9845571-stop158-whim2
USP54		0.103					0.222	-0.016							USP54	USP54	USP54	USP54	NP_689799-A-2-4_1391_1388_1396	NP_689799-A-2-4-chr10-75260596-75265065-141-variant-whim21
CCDC176		0.4205					0.327	0.514							CCDC176	CCDC176	CCDC176	CCDC176	NP_079333-A-6-8_217_210_217	NP_079333-A-6-8-chr14-74512833-74516404-145-stop244-whim12
PLS3		NaN													PLS3	PLS3	PLS3	PLS3	NP_005023-AN1-1-chrX_26_24_31	NP_005023-AN1-1-chrX-114844635-114845114-stop32-whim12
MTDH_1		NaN													MTDH_1	MTDH	MTDH_1	MTDH_1	NP_848927-AN1-6-chr8_350_344_357	NP_848927-AN1-6-chr8-98703416-98708431-stop382-whim12
LGALS1_1		-0.124									-0.013	-0.235			LGALS1_1	LGALS1	LGALS1_1	LGALS1_1	NP_002296-AN1-2-chr22_30_22_30	NP_002296-AN1-2-chr22-38073072-38074512-stop90-whim12
EIF4A2		NaN													EIF4A2	EIF4A2	EIF4A2	EIF4A2	NP_001958-AN1-4-chr3_117_160_167	NP_001958-AN1-4-chr3-186502890-186503680-stop181-whim2
CTTN		-0.9405					-1.013	-0.868							CTTN	CTTN	CTTN	CTTN	NP_001171669-A-7-9_227_222_230	NP_001171669-A-7-9-chr11-70265962-70269045-111-variant-whim4
PPRC1		0.07					-0.007	0.147							PPRC1	PPRC1	PPRC1	PPRC1	NP_055877-AN1-7-chr10_1204_1220_1227	NP_055877-AN1-7-chr10-103904064-103906870-stop1300-whim6
CAPN7		0.385					0.727	0.043							CAPN7	CAPN7	CAPN7	CAPN7	NP_055111-AN1-12-chr3_470_471_479	NP_055111-AN1-12-chr3-15276652-15277772-stop504-whim2
TCP1		NaN													TCP1	TCP1	TCP1	TCP1	NP_110379-A-2-4_366_356_366	NP_110379-A-2-4-chr6-160200822-160201474-193-stop388-whim2
FUBP3_1		-0.548									-0.682	-0.414			FUBP3_1	FUBP3	FUBP3_1	FUBP3_1	NP_003925-A-15-18_478_514_528	NP_003925-A-15-18-chr9-133507409-133511385-149-stop567-whim2
CPSF3L		0.865					1.041	0.689							CPSF3L	CPSF3L	CPSF3L	CPSF3L	NP_001243385-AN2-11-chr1_241_241_248	NP_001243385-AN2-11-chr1-1250000-1250203-stop286-whim2
TTC13		NaN													TTC13	TTC13	TTC13	TTC13	NP_078801-A-17-19_194_191_200	NP_078801-A-17-19-chr1-231076302-231081134-93-variant-whim21
BCL2L12		0.756									0.533	0.979			BCL2L12	BCL2L12	BCL2L12	BCL2L12	NP_619580-AN1-5-chr19_229_247_254	NP_619580-AN1-5-chr19-50172372-50173502-stop335-whim30
PLEKHH2		NaN													PLEKHH2	PLEKHH2	PLEKHH2	PLEKHH2	NP_742066-AN1-2-chr2_63_77_89	NP_742066-AN1-2-chr2-43906064-43906655-stop90-whim2
TROAP		NaN													TROAP	TROAP	TROAP	TROAP	NP_005471-AN1-11-chr12_434_533_546	NP_005471-AN1-11-chr12-49723774-49724245-stop627-whim4
OGFRL1		NaN													OGFRL1	OGFRL1	OGFRL1	OGFRL1	NP_078852-AN1-2-chr6_108_104_111	NP_078852-AN1-2-chr6-72003082-72003232-stop139-whim12
BCAS3_1		0.0905									0.131	0.05			BCAS3_1	BCAS3	BCAS3_1	BCAS3_1	NP_001092902-AN1-23-chr17_880_873_888	NP_001092902-AN1-23-chr17-59445855-59457866-stop904-whim12
NDUFV3		NaN													NDUFV3	NDUFV3	NDUFV3	NDUFV3	NP_066553-AN1-3-chr21_422_430_437	NP_066553-AN1-3-chr21-44324386-44326949-stop453-whim21
SEC31B		NaN													SEC31B	SEC31B	SEC31B	SEC31B	NP_056305-A-16-21_214_207_217	NP_056305-A-16-21-chr10-102262241-102267664-540-variant-whim4
CCDC150		0.2375							0.327	0.148					CCDC150	CCDC150	CCDC150	CCDC150	NP_001074008-A-5-10_216_213_223	NP_001074008-A-5-10-chr2-197523584-197538964-384-variant-whim2
ALPL		0.291									0.256	0.326			ALPL	ALPL	ALPL	ALPL	NP_000469-AN1-2-chr1_61_69_80	NP_000469-AN1-2-chr1-21887238-21887607-stop103-whim2
NOXA1		0.2655					0.297	0.234							NOXA1	NOXA1	NOXA1	NOXA1	NP_001242997-AN1-4-chr9_169_217_226	NP_001242997-AN1-4-chr9-140323468-140323655-stop289-whim2
USP48		0.2555					0.263	0.248							USP48	USP48	USP48	USP48	NP_115612-AN2-9-chr1_796_795_804	NP_115612-AN2-9-chr1-22030881-22032219-stop805-whim12
MTRF1L		0.294					0.377	0.211							MTRF1L	MTRF1L	MTRF1L	MTRF1L	NP_001107656-AN2-5-chr6_114_106_116	NP_001107656-AN2-5-chr6-153319286-153319684-stop117-whim12
SEMA4A		-0.552							-0.072	-1.032					SEMA4A	SEMA4A	SEMA4A	SEMA4A	NP_071762-A-9-11_379_364_382	NP_071762-A-9-11-chr1-156132885-156144612-181-stop388-whim30
LAP3		NaN													LAP3	LAP3	LAP3	LAP3	NP_056991-A-8-10_330_322_330	NP_056991-A-8-10-chr4-17597157-17600078-89-stop331-whim2
GDI1		0.0855							0.141	0.03					GDI1	GDI1	GDI1	GDI1	NP_001484-AN1-7-chrX_274_288_299	NP_001484-AN1-7-chrX-153669542-153669942-stop372-whim30
RAB11FIP3		NaN													RAB11FIP3	RAB11FIP3	RAB11FIP3	RAB11FIP3	NP_055515-AN1-6-chr16_435_455_463	NP_055515-AN1-6-chr16-546859-555540-stop503-whim12
ZC2HC1A		-0.1685									-0.152	-0.185			ZC2HC1A	ZC2HC1A	ZC2HC1A	ZC2HC1A	NP_057094-AN1-7-chr8_236_266_274	NP_057094-AN1-7-chr8-79610748-79624224-stop275-whim12
EIF3C		NaN													EIF3C	EIF3C	EIF3C	EIF3C	NP_003743-AN1-7-chr16_260_264_271	NP_003743-AN1-7-chr16-28726755-28734472-stop327-whim30
ANKRD28		NaN													ANKRD28	ANKRD28	ANKRD28	ANKRD28	NP_056014-AN2-24-chr3_155_173_187	NP_056014-AN2-24-chr3-15777003-15778539-stop188-whim2
MSH6		-0.3615					-0.355	-0.368							MSH6	MSH6	MSH6	MSH6	NP_000170-AN1-3-chr2_210_522_536	NP_000170-AN1-3-chr2-48023202-48026976-stop656-whim2
PTMS		0.053							-0.152	0.258					PTMS	PTMS	PTMS	PTMS	NP_002815-AN1-2-chr12_40_51_65	NP_002815-AN1-2-chr12-6878840-6879009-stop129-whim12
PLA2G4C		0.449					0.445	0.453							PLA2G4C	PLA2G4C	PLA2G4C	PLA2G4C	NP_001152794-AN2-5-chr19_379_382_392	NP_001152794-AN2-5-chr19-48565452-48571047-stop450-whim30
CLCN7		0.129											0.113	0.145	CLCN7	CLCN7	CLCN7	CLCN7	NP_001278-AN2-21-chr16_162_181_196	NP_001278-AN2-21-chr16-1510556-1510816-stop373-whim4
HNRNPA2B1_2		0.047									0.118	-0.024			HNRNPA2B1_2	HNRNPA2B1	HNRNPA2B1_2	HNRNPA2B1_2	NP_112533-A-4-6_205_201_211	NP_112533-A-4-6-chr7-26235529-26236176-81-whim12
ASUN		0.0875							0.161	0.014					ASUN	ASUN	ASUN	ASUN	NP_060634-A-5-7_417_415_426	NP_060634-A-5-7-chr12-27067061-27068934-171-whim12
ANO1		NaN													ANO1	ANO1	ANO1	ANO1	NP_060513-AN1-6-chr11_268_264_272	NP_060513-AN1-6-chr11-69954510-69957231-stop329-whim2
TFCP2L1		NaN													TFCP2L1	TFCP2L1	TFCP2L1	TFCP2L1	NP_055368-A-9-11_169_163_170	NP_055368-A-9-11-chr2-122000045-122005739-153-whim2
TAF3		NaN													TAF3	TAF3	TAF3	TAF3	NP_114129-AN1-2-chr10_141_823_833	NP_114129-AN1-2-chr10-7866523-8005885-stop849-whim2
NDRG2		-0.7225									-0.576	-0.869			NDRG2	NDRG2	NDRG2	NDRG2	NP_963293-AN2-8-chr14_206_186_215	NP_963293-AN2-8-chr14-21487898-21488078-stop371-whim2
SSFA2_1		-0.5905											-0.042	-1.139	SSFA2_1	SSFA2	SSFA2_1	SSFA2_1	NP_001123917-AN1-7-chr2_238_415_423	NP_001123917-AN1-7-chr2-182765631-182766558-stop486-whim12
SMARCC1		0.0185							0.088	-0.051					SMARCC1	SMARCC1	SMARCC1	SMARCC1	NP_003065-A-8-10_634_616_634	NP_003065-A-8-10-chr3-47702945-47712147-259-stop738-whim2
SEC31A_2		0.419									0.478	0.36			SEC31A_2	SEC31A	SEC31A_2	SEC31A_2	NP_001070675-AN2-4-chr4_1098_1104_1111	NP_001070675-AN2-4-chr4-83745819-83748521-stop1112-whim2
ACTR3		0.149					0.117	0.181							ACTR3	ACTR3	ACTR3	ACTR3	NP_005712-AN1-2-chr2_33_19_33	NP_005712-AN1-2-chr2-114670804-114674474-stop34-whim2
C6orf70		0.3935									0.359	0.428			C6orf70	C6orf70	C6orf70	C6orf70	NP_001265460-AN1-16-chr6_533_544_563	NP_001265460-AN1-16-chr6-170176507-170176610-stop617-whim2
TNC_3		-0.241					-0.249	-0.233							TNC_3	TNC	TNC_3	TNC_3	NP_002151-A-17-19_1072_1069_1091	NP_002151-A-17-19-chr9-117826347-117835881-273-variant-whim30
NRF1		-0.298					-0.31	-0.286							NRF1	NRF1	NRF1	NRF1	NP_005002-AN1-9-chr7_450_473_481	NP_005002-AN1-9-chr7-129367205-129374882-stop482-whim2
DECR2		0.471					0.375	0.567							DECR2	DECR2	DECR2	DECR2	NP_065715-AN1-4-chr16_114_141_148	NP_065715-AN1-4-chr16-457560-460208-stop161-whim2
USP54_1		NaN													USP54_1	USP54	USP54_1	USP54_1	NP_689799-A-6-8_788_778_789	NP_689799-A-6-8-chr10-75279750-75283340-120-variant-whim21
ARFIP2		-0.26									-0.142	-0.378			ARFIP2	ARFIP2	ARFIP2	ARFIP2	NP_001229785-AN2-5-chr11_21_31_38	NP_001229785-AN2-5-chr11-6500464-6501201-stop53-whim2
RPS17L		-0.012									-0.057	0.033			RPS17L	RPS17L	RPS17L	RPS17L	NP_001185986-AN2-3-chr15_88_82_101	NP_001185986-AN2-3-chr15-83207116-83207630-stop134-whim2
CERS2		-0.389									-0.513	-0.265			CERS2	CERS2	CERS2	CERS2	NP_071358-A-3-6_175_166_184	NP_071358-A-3-6-chr1-150939338-150940139-222-whim30
MYOF		NaN													MYOF	MYOF	MYOF	MYOF	NP_038479-A-41-46_282_273_289	NP_038479-A-41-46-chr10-95157213-95163779-378-whim12
DLG4		-0.2125									-0.162	-0.263			DLG4	DLG4	DLG4	DLG4	NP_001356-A-13-15_213_209_222	NP_001356-A-13-15-chr17-7106366-7106742-137-stop223-whim30
MTRR		NaN													MTRR	MTRR	MTRR	MTRR	NP_076915-AN1-11-chr5_548_576_583	NP_076915-AN1-11-chr5-7893026-7893619-stop586-whim12
TAF4		-0.368							-0.326	-0.41					TAF4	TAF4	TAF4	TAF4	NP_003176-AN2-11-chr20_629_622_639	NP_003176-AN2-11-chr20-60582680-60584107-stop1082-whim2
NCOR2_1		NaN													NCOR2_1	NCOR2	NCOR2_1	NCOR2_1	NP_006303-A-29-31_674_865_879	NP_006303-A-29-31-chr12-124859009-124870290-148-stop914-whim2
NF1		0.063					0.06	0.066							NF1	NF1	NF1	NF1	NP_001035957-AN1-36-chr17_1613_1601_1618	NP_001035957-AN1-36-chr17-29592357-29624008-stop1636-whim30
ETFB		-0.971							-0.773	-1.169					ETFB	ETFB	ETFB	ETFB	NP_001014763-AN2-4-chr19_217_216_232	NP_001014763-AN2-4-chr19-51853668-51856385-stop236-whim12
PSMD14		NaN													PSMD14	PSMD14	PSMD14	PSMD14	NP_005796-AN1-5-chr2_155_169_184	NP_005796-AN1-5-chr2-162227833-162228506-stop212-whim12
HR		NaN													HR	HR	HR	HR	NP_005135-AN2-12-chr8_708_725_733	NP_005135-AN2-12-chr8-21979205-21980005-stop740-whim2
NAA50		NaN													NAA50	NAA50	NAA50	NAA50	NP_079422-AN2-3-chr3_90_95_108	NP_079422-AN2-3-chr3-113440775-113442268-stop117-whim2
ANKLE2		-0.116					0.072	-0.304							ANKLE2	ANKLE2	ANKLE2	ANKLE2	NP_055929-AN2-4-chr12_632_1024_1032	NP_055929-AN2-4-chr12-133310386-133310970-stop1239-whim2
DDX19B		NaN													DDX19B	DDX19B	DDX19B	DDX19B	NP_009173-AN1-8-chr16_263_304_313	NP_009173-AN1-8-chr16-70363372-70363718-stop352-whim2
MIA		0.135					-0.026	0.296							MIA	MIA	MIA	MIA	NP_006524-AN1-2-chr19_88_108_116	NP_006524-AN1-2-chr19-41281790-41282879-stop173-whim30
CCT5_2		0.066							0.14	-0.008					CCT5_2	CCT5	CCT5_2	CCT5_2	NP_036205-AN1-7-chr5_332_342_349	NP_036205-AN1-7-chr5-10261023-10261758-stop367-whim2
B4GALNT3		NaN													B4GALNT3	B4GALNT3	B4GALNT3	B4GALNT3	NP_775864-AN1-13-chr12_424_560_574	NP_775864-AN1-13-chr12-661694-662356-stop715-whim2
PKP4		NaN													PKP4	PKP4	PKP4	PKP4	NP_001005476-AN1-7-chr2_448_445_454	NP_001005476-AN1-7-chr2-159488453-159490584-stop526-whim12
RFC5		NaN													RFC5	RFC5	RFC5	RFC5	NP_031396-A-5-10_142_141_148	NP_031396-A-5-10-chr12-118460164-118467575-450-whim2
KIF4A		-0.187							-0.122	-0.252					KIF4A	KIF4A	KIF4A	KIF4A	NP_036442-AN1-22-chrX_874_924_942	NP_036442-AN1-22-chrX-69622545-69623734-stop947-whim2
DGKZ		NaN													DGKZ	DGKZ	DGKZ	DGKZ	NP_001099010-A-11-14_526_524_540	NP_001099010-A-11-14-chr11-46394060-46394510-175-stop624-whim2
NDOR1		-0.3415									-0.31	-0.373			NDOR1	NDOR1	NDOR1	NDOR1	NP_001137498-AN1-6-chr9_241_256_272	NP_001137498-AN1-6-chr9-140108865-140109207-stop297-whim30
CNOT11		-0.051					-0.138	0.036							CNOT11	CNOT11	CNOT11	CNOT11	NP_060016-AN1-3-chr2_278_315_322	NP_060016-AN1-3-chr2-101879153-101881321-stop344-whim2
NBEAL1		-0.0995					-0.037	-0.162							NBEAL1	NBEAL1	NBEAL1	NBEAL1	NP_001107604-AN1-7-chr2_229_298_310	NP_001107604-AN1-7-chr2-203942560-203947911-stop352-whim2
UBE2I		NaN													UBE2I	UBE2I	UBE2I	UBE2I	NP_003336-AN1-3-chr16_74_62_74	NP_003336-AN1-3-chr16-1365727-1369702-stop75-whim12
FAF2		0.0585									0.171	-0.054			FAF2	FAF2	FAF2	FAF2	NP_055428-AN1-8-chr5_281_317_326	NP_055428-AN1-8-chr5-175923664-175925923-stop350-whim2
XDH		NaN													XDH	XDH	XDH	XDH	NP_000370-AN2-27-chr2_297_327_334	NP_000370-AN2-27-chr2-31606179-31606620-stop335-whim2
MYO18A		-0.1205					-0.088	-0.153							MYO18A	MYO18A	MYO18A	MYO18A	NP_510880-A-21-41_334_329_337	NP_510880-A-21-41-chr17-27426780-27492959-2508-whim2
LYST		-0.0345							-0.054	-0.015					LYST	LYST	LYST	LYST	NP_000072-A-29-32_2085_2064_2087	NP_000072-A-29-32-chr1-235918947-235926019-806-stop2092-whim2
CHD2		0.3405											0.241	0.44	CHD2	CHD2	CHD2	CHD2	NP_001262-AN1-2-chr15_99_98_107	NP_001262-AN1-2-chr15-93467782-93470531-stop1810-whim2
GAB1		0.299											0.384	0.214	GAB1	GAB1	GAB1	GAB1	NP_002030-A-2-4_123_136_146	NP_002030-A-2-4-chr4-144336924-144359151-226-stop157-whim30
RNMT		0.137									0.21	0.064			RNMT	RNMT	RNMT	RNMT	NP_003790-AN1-9-chr18_465_482_489	NP_003790-AN1-9-chr18-13754146-13757212-stop513-whim2
WWC2		0.2505					0.34	0.161							WWC2	WWC2	WWC2	WWC2	NP_079225-AN1-15-chr4_801_797_805	NP_079225-AN1-15-chr4-184190316-184190914-stop816-whim30
PIKFYVE		NaN													PIKFYVE	PIKFYVE	PIKFYVE	PIKFYVE	NP_055855-AN1-34-chr2_1793_1801_1809	NP_055855-AN1-34-chr2-209212747-209215503-stop1849-whim2
AIG1		NaN													AIG1	AIG1	AIG1	AIG1	NP_057192-AN1-5-chr6_227_232_239	NP_057192-AN1-5-chr6-143654582-143656187-stop240-whim12
SLMO1		NaN													SLMO1	SLMO1	SLMO1	SLMO1	NP_006544-AN1-4-chr18_122_134_145	NP_006544-AN1-4-chr18-12427110-12427183-stop177-whim2
SDK1		1.4185											0.872	1.965	SDK1	SDK1	SDK1	SDK1	NP_689957-AN1-38-chr7_1847_1856_1865	NP_689957-AN1-38-chr7-4249794-4250126-stop1887-whim30
CCDC150_1		-0.1325									-0.1	-0.165			CCDC150_1	CCDC150	CCDC150_1	CCDC150_1	NP_001074008-A-22-26_853_849_862	NP_001074008-A-22-26-chr2-197590823-197595582-426-variant-whim2
KIF14		0.2965					0.329	0.264							KIF14	KIF14	KIF14	KIF14	NP_055690-A-9-11_1113_1113_1120	NP_055690-A-9-11-chr1-200544819-200550328-130-stop1150-whim30
THUMPD2		NaN													THUMPD2	THUMPD2	THUMPD2	THUMPD2	NP_079540-AN2-3-chr2_360_373_385	NP_079540-AN2-3-chr2-39978331-39982434-stop391-whim2
GYLTL1B		0.2035									0.223	0.184			GYLTL1B	GYLTL1B	GYLTL1B	GYLTL1B	NP_689525-AN1-12-chr11_651_641_654	NP_689525-AN1-12-chr11-45949923-45950266-stop655-whim2
S100PBP		NaN													S100PBP	S100PBP	S100PBP	S100PBP	NP_073590-AN1-1-chr1_278_297_304	NP_073590-AN1-1-chr1-33292531-33293596-stop308-whim12
CAPN2		-0.8285											-0.632	-1.025	CAPN2	CAPN2	CAPN2	CAPN2	NP_001139540-A-9-11_301_346_355	NP_001139540-A-9-11-chr1-223940658-223945070-170-stop369-whim2
LOXL2		0.9995					1.002	0.997							LOXL2	LOXL2	LOXL2	LOXL2	NP_002309-AN2-10-chr8_323_374_381	NP_002309-AN2-10-chr8-23186100-23190913-stop406-whim12
KIFC3		0.1515					0.22	0.083							KIFC3	KIFC3	KIFC3	KIFC3	NP_005541-A-16-18_60_55_66	NP_005541-A-16-18-chr16-57806200-57831983-143-stop67-whim30
SRCIN1		-0.632					-0.707	-0.557							SRCIN1	SRCIN1	SRCIN1	SRCIN1	NP_079524-AN2-2-chr17_1140_1230_1254	NP_079524-AN2-2-chr17-36699942-36700057-stop1268-whim2
PSMD11		-0.1155											0.206	-0.437	PSMD11	PSMD11	PSMD11	PSMD11	NP_001257411-A-8-11_284_283_292	NP_001257411-A-8-11-chr17-30801842-30806868-189-whim12
KIF1B_1		NaN													KIF1B_1	KIF1B	KIF1B_1	KIF1B_1	NP_055889-A-43-45_1653_1635_1653	NP_055889-A-43-45-chr1-10434523-10435312-193-stop1677-whim2
NKD2		0.7225							-0.126	1.571					NKD2	NKD2	NKD2	NKD2	NP_149111-AN1-8-chr5_223_451_458	NP_149111-AN1-8-chr5-1035588-1036224-stop579-whim2
BOC		-0.298									-0.376	-0.22			BOC	BOC	BOC	BOC	NP_150279-AN1-9-chr3_605_662_671	NP_150279-AN1-9-chr3-112997630-112998101-stop724-whim2
COL6A1		0.1755					0.177	0.174							COL6A1	COL6A1	COL6A1	COL6A1	NP_001839-AN1-19-chr21_446_443_452	NP_001839-AN1-19-chr21-47412724-47413674-stop454-whim30
TMEM259		0.135											0.166	0.104	TMEM259	TMEM259	TMEM259	TMEM259	NP_001028198-AN2-10-chr19_170_188_197	NP_001028198-AN2-10-chr19-1013399-1014190-stop641-whim12
WDR5		-0.205					-0.112	-0.298							WDR5	WDR5	WDR5	WDR5	NP_060058-AN1-12-chr9_302_297_314	NP_060058-AN1-12-chr9-137021715-137021952-stop315-whim2
VWA9		0.0875											0.093	0.082	VWA9	VWA9	VWA9	VWA9	NP_001193987-AN2-7-chr15_233_229_243	NP_001193987-AN2-7-chr15-65889933-65890658-stop244-whim12
POLR3E		-0.009					-0.047	0.029							POLR3E	POLR3E	POLR3E	POLR3E	NP_001244965-AN1-2-chr16_30_25_32	NP_001244965-AN1-2-chr16-22316527-22316699-stop63-whim2
CLN6		-0.1365					0.018	-0.291							CLN6	CLN6	CLN6	CLN6	NP_060352-AN2-3-chr15_182_240_254	NP_060352-AN2-3-chr15-68502957-68503600-stop307-whim4
COLGALT1		-0.276									-0.086	-0.466			COLGALT1	COLGALT1	COLGALT1	COLGALT1	NP_078932-AN1-10-chr19_466_479_486	NP_078932-AN1-10-chr19-17690418-17691277-stop534-whim2
RNF207		-0.2875							-0.365	-0.21					RNF207	RNF207	RNF207	RNF207	NP_997279-AN1-13-chr1_495_490_499	NP_997279-AN1-13-chr1-6272476-6272727-stop640-whim2
THADA		-0.293							-0.201	-0.385					THADA	THADA	THADA	THADA	NP_071348-AN2-9-chr2_1449_1449_1456	NP_071348-AN2-9-chr2-43565075-43571260-stop1486-whim30
CCNH		-0.892									-0.758	-1.026			CCNH	CCNH	CCNH	CCNH	NP_001230-AN2-7-chr5_106_89_111	NP_001230-AN2-7-chr5-86703953-86705106-stop124-whim12
SRSF11		NaN													SRSF11	SRSF11	SRSF11	SRSF11	NP_004759-AN1-11-chr1_420_417_428	NP_004759-AN1-11-chr1-70716186-70716262-stop435-whim2
CDC20		NaN													CDC20	CDC20	CDC20	CDC20	NP_001246-AN1-3-chr1_143_162_179	NP_001246-AN1-3-chr1-43825492-43825620-stop186-whim6
RANBP2		NaN													RANBP2	RANBP2	RANBP2	RANBP2	NP_006258-AN1-19-chr2_901_1066_1079	NP_006258-AN1-19-chr2-109378651-109382620-stop1648-whim12
CD46		NaN													CD46	CD46	CD46	CD46	NP_758862-AN1-4-chr1_159_154_166	NP_758862-AN1-4-chr1-207933069-207934595-stop175-whim2
CDKAL1		0.8495											0.566	1.133	CDKAL1	CDKAL1	CDKAL1	CDKAL1	NP_060244-A-1-3_58_65_74	NP_060244-A-1-3-chr6-20546754-20649523-113-stop78-whim12
ACTN4_2		NaN													ACTN4_2	ACTN4	ACTN4_2	ACTN4_2	NP_004915-AN1-11-chr19_432_448_458	NP_004915-AN1-11-chr19-39208714-39209389-stop510-whim21
MASP2		-0.286											-0.074	-0.498	MASP2	MASP2	MASP2	MASP2	NP_631947-A-2-4_79_190_205	NP_631947-A-2-4-chr1-11105596-11106947-178-stop224-whim21
RALY		-0.348											-0.239	-0.457	RALY	RALY	RALY	RALY	NP_057951-A-5-7_220_217_226	NP_057951-A-5-7-chr20-32664621-32666310-218-stop229-whim12
MAP3K6		-0.4445					-0.313	-0.576							MAP3K6	MAP3K6	MAP3K6	MAP3K6	NP_004663-AN2-12-chr1_810_947_972	NP_004663-AN2-12-chr1-27685347-27685907-stop988-whim2
AKAP10		0.169											0.034	0.304	AKAP10	AKAP10	AKAP10	AKAP10	NP_009133-AN2-5-chr17_585_581_589	NP_009133-AN2-5-chr17-19823428-19827720-stop662-whim2
TMED4		-1.821					-1.919	-1.723							TMED4	TMED4	TMED4	TMED4	NP_872353-AN2-4-chr7_88_99_111	NP_872353-AN2-4-chr7-44621183-44621321-stop112-whim12
LOC81691		NaN													LOC81691	LOC81691	LOC81691	LOC81691	NP_001185982-AN1-16-chr16_646_636_647	NP_001185982-AN1-16-chr16-20856167-20856423-stop774-whim2
PC		-0.0925									-0.053	-0.132			PC	PC	PC	PC	NP_071504-AN2-14-chr11_341_414_427	NP_071504-AN2-14-chr11-66633816-66636316-stop442-whim2
SLC27A1		NaN													SLC27A1	SLC27A1	SLC27A1	SLC27A1	NP_940982-AN1-2-chr19_188_215_222	NP_940982-AN1-2-chr19-17597766-17597912-stop333-whim2
MTCH1		0.0435									0.166	-0.079			MTCH1	MTCH1	MTCH1	MTCH1	NP_055156-A-4-9_198_197_209	NP_055156-A-4-9-chr6-36938470-36945853-264-whim2
PRDM11		0.1115					0.289	-0.066							PRDM11	PRDM11	PRDM11	PRDM11	NP_001243625-AN1-4-chr11_186_186_193	NP_001243625-AN1-4-chr11-45226329-45230424-stop421-whim12
CARM1		0.503											0.102	0.904	CARM1	CARM1	CARM1	CARM1	NP_954592-AN1-3-chr19_152_272_286	NP_954592-AN1-3-chr19-11018821-11019465-stop331-whim30
UVSSA		0.3755					0.318	0.433							UVSSA	UVSSA	UVSSA	UVSSA	NP_065945-AN1-5-chr4_350_360_373	NP_065945-AN1-5-chr4-1348635-1348774-stop409-whim30
TRIP12		NaN													TRIP12	TRIP12	TRIP12	TRIP12	NP_004229-AN2-17-chr2_1248_1236_1248	NP_004229-AN2-17-chr2-230657847-230659894-stop1285-whim12
CDH5		NaN													CDH5	CDH5	CDH5	CDH5	NP_001786-AN1-10-chr16_613_648_657	NP_001786-AN1-10-chr16-66434919-66436778-stop679-whim2
ACADVL		0.4725					0.377	0.568							ACADVL	ACADVL	ACADVL	ACADVL	NP_001257376-AN1-12-chr17_418_406_418	NP_001257376-AN1-12-chr17-7126556-7126801-stop428-whim12
MAP4K3		NaN													MAP4K3	MAP4K3	MAP4K3	MAP4K3	NP_003609-A-12-14_530_527_536	NP_003609-A-12-14-chr2-39507497-39513992-42-whim2
SUZ12		0.1065					0.191	0.022							SUZ12	SUZ12	SUZ12	SUZ12	NP_056170-AN1-8-chr17_307_307_324	NP_056170-AN1-8-chr17-30303633-30315340-stop367-whim2
NFX1		NaN													NFX1	NFX1	NFX1	NFX1	NP_667344-AN1-11-chr9_679_677_687	NP_667344-AN1-11-chr9-33332500-33338504-stop708-whim12
SLC4A2		NaN													SLC4A2	SLC4A2	SLC4A2	SLC4A2	NP_001186621-AN1-15-chr7_846_879_898	NP_001186621-AN1-15-chr7-150769223-150770418-stop904-whim30
CTSA		0.2275									0.148	0.307			CTSA	CTSA	CTSA	CTSA	NP_000299-A-7-9_249_271_289	NP_000299-A-7-9-chr20-44521950-44523288-85-stop356-whim2
UTP18		0.069									-0.292	0.43			UTP18	UTP18	UTP18	UTP18	NP_057085-AN1-10-chr17_444_449_471	NP_057085-AN1-10-chr17-49362729-49363843-stop535-whim12
PPP3CB		-0.3775									-0.235	-0.52			PPP3CB	PPP3CB	PPP3CB	PPP3CB	NP_066955-A-10-12_138_153_162	NP_066955-A-10-12-chr10-75231371-75238256-112-stop163-whim30
NUMBL		0.817					0.809	0.825							NUMBL	NUMBL	NUMBL	NUMBL	NP_004747-A-3-5_181_241_251	NP_004747-A-3-5-chr19-41179554-41186821-190-stop260-whim30
P4HA1		-0.181									-0.202	-0.16			P4HA1	P4HA1	P4HA1	P4HA1	NP_001136068-AN2-5-chr10_417_438_455	NP_001136068-AN2-5-chr10-74776654-74790028-stop470-whim30
NOL10		0.5495					0.712	0.387							NOL10	NOL10	NOL10	NOL10	NP_079170-AN2-9-chr2_343_336_349	NP_079170-AN2-9-chr2-10774685-10784445-stop370-whim2
ZNF462_1		0.1					0.087	0.113							ZNF462_1	ZNF462	ZNF462_1	ZNF462_1	NP_067047-AN1-3-chr9_2005_2005_2015	NP_067047-AN1-3-chr9-109692970-109693125-stop2051-whim2
H2AFY		-0.5615									-0.57	-0.553			H2AFY	H2AFY	H2AFY	H2AFY	NP_613075-AN2-8-chr5_58_66_87	NP_613075-AN2-8-chr5-134696295-134724611-stop124-whim2
BAIAP2		NaN													BAIAP2	BAIAP2	BAIAP2	BAIAP2	NP_059345-AN1-9-chr17_357_351_364	NP_059345-AN1-9-chr17-79077908-79078310-stop442-whim12
EPS8L2		-0.1365									-0.067	-0.206			EPS8L2	EPS8L2	EPS8L2	EPS8L2	NP_073609-AN1-4-chr11_110_103_118	NP_073609-AN1-4-chr11-720223-720548-stop327-whim12
SFI1		0.904					0.684	1.124							SFI1	SFI1	SFI1	SFI1	NP_001007468-A-16-21_603_743_753	NP_001007468-A-16-21-chr22-31998771-32003922-352-stop783-whim2
FBXL5		NaN													FBXL5	FBXL5	FBXL5	FBXL5	NP_001180463-AN2-8-chr4_195_192_202	NP_001180463-AN2-8-chr4-15638294-15640130-stop209-whim12
MYO9B		-0.9275					-0.481	-1.374							MYO9B	MYO9B	MYO9B	MYO9B	NP_004136-AN1-23-chr19_1414_1417_1428	NP_004136-AN1-23-chr19-17309117-17311069-stop1463-whim12
ZNF704		NaN													ZNF704	ZNF704	ZNF704	ZNF704	NP_001028895-AN2-8-chr8_75_98_106	NP_001028895-AN2-8-chr8-81700895-81733608-stop110-whim30
NCOR2_2		0.4385					0.365	0.512							NCOR2_2	NCOR2	NCOR2_2	NCOR2_2	NP_006303-A-26-28_937_987_998	NP_006303-A-26-28-chr12-124846843-124856567-121-stop1022-whim2
ASAH1		0.7215					0.621	0.822							ASAH1	ASAH1	ASAH1	ASAH1	NP_001120977-AN2-13-chr8_59_50_59	NP_001120977-AN2-13-chr8-17928894-17933049-stop69-whim2
SMC4		0.1085					0.204	0.013							SMC4	SMC4	SMC4	SMC4	NP_005487-AN1-4-chr3_230_225_233	NP_005487-AN1-4-chr3-160122292-160124201-stop238-whim12
NEK7		-0.274									-0.293	-0.255			NEK7	NEK7	NEK7	NEK7	NP_598001-AN1-5-chr1_161_165_172	NP_598001-AN1-5-chr1-198247199-198247811-stop173-whim2
MED27		0.808					0.808	0.808							MED27	MED27	MED27	MED27	NP_001240810-AN2-6-chr9_117_117_125	NP_001240810-AN2-6-chr9-134935761-134952828-stop135-whim6
TMX3		NaN													TMX3	TMX3	TMX3	TMX3	NP_061895-AN2-15-chr18_35_12_36	NP_061895-AN2-15-chr18-66379733-66381082-stop136-whim12
DLG5		-0.1745									-0.134	-0.215			DLG5	DLG5	DLG5	DLG5	NP_004738-AN2-17-chr10_1177_1209_1217	NP_004738-AN2-17-chr10-79579446-79579652-stop1340-whim12
DDX26B		-1.1315							-1.182	-1.081					DDX26B	DDX26B	DDX26B	DDX26B	NP_872346-A-13-15_592_606_623	NP_872346-A-13-15-chrX-134709151-134713712-235-stop624-whim2
KMT2A		NaN													KMT2A	KMT2A	KMT2A	KMT2A	NP_001184033-AN1-33-chr11_3811_3808_3826	NP_001184033-AN1-33-chr11-118390779-118391519-stop3848-whim2
DAGLB		0.1275									0.065	0.19			DAGLB	DAGLB	DAGLB	DAGLB	NP_631918-A-12-14_83_197_210	NP_631918-A-12-14-chr7-6474651-6485583-172-stop218-whim2
PLCB2		0.2325											-0.005	0.47	PLCB2	PLCB2	PLCB2	PLCB2	NP_004564-AN2-26-chr15_195_207_222	NP_004564-AN2-26-chr15-40593375-40594157-stop273-whim30
TGFB2		NaN													TGFB2	TGFB2	TGFB2	TGFB2	NP_001129071-AN1-5-chr1_280_271_290	NP_001129071-AN1-5-chr1-218607790-218609426-stop405-whim2
SCNN1D		NaN													SCNN1D	SCNN1D	SCNN1D	SCNN1D	NP_001123885-AN1-10-chr1_468_462_491	NP_001123885-AN1-10-chr1-1222976-1223122-stop780-whim2
SLC25A44		-0.4055							-0.311	-0.5					SLC25A44	SLC25A44	SLC25A44	SLC25A44	NP_055470-AN1-2-chr1_252_248_255	NP_055470-AN1-2-chr1-156177804-156177956-stop293-whim30
ADAMTS18		-0.038									-0.051	-0.025			ADAMTS18	ADAMTS18	ADAMTS18	ADAMTS18	NP_955387-AN2-21-chr16_166_202_212	NP_955387-AN2-21-chr16-77401567-77465191-stop256-whim6
POMT2		-0.125									-0.114	-0.136			POMT2	POMT2	POMT2	POMT2	NP_037514-AN2-13-chr14_373_377_394	NP_037514-AN2-13-chr14-77759634-77762506-stop395-whim30
ARHGAP40		0.179					0.359	-0.001							ARHGAP40	ARHGAP40	ARHGAP40	ARHGAP40	NP_001157903-AN1-3-chr20_186_177_192	NP_001157903-AN1-3-chr20-37255858-37258147-stop649-whim30
IDH2		NaN													IDH2	IDH2	IDH2	IDH2	NP_002159-AN2-7-chr15_227_206_235	NP_002159-AN2-7-chr15-90630785-90631590-stop241-whim2
NES		NaN													NES	NES	NES	NES	NP_006608-AN2-3-chr1_306_293_318	NP_006608-AN2-3-chr1-156643723-156645007-stop326-whim2
ACTR3_1		-0.16											-0.238	-0.082	ACTR3_1	ACTR3	ACTR3_1	ACTR3_1	NP_005712-AN1-7-chr2_229_238_251	NP_005712-AN1-7-chr2-114697679-114698416-stop264-whim2
CHUK		0.2715					0.103	0.44							CHUK	CHUK	CHUK	CHUK	NP_001269-AN2-5-chr10_609_603_611	NP_001269-AN2-5-chr10-101953786-101954181-stop712-whim2
NT5DC2		NaN													NT5DC2	NT5DC2	NT5DC2	NT5DC2	NP_001127703-AN2-12-chr3_165_182_195	NP_001127703-AN2-12-chr3-52562800-52562876-stop198-whim12
PAPSS2		-0.051					-0.138	0.036							PAPSS2	PAPSS2	PAPSS2	PAPSS2	NP_001015880-AN1-2-chr10_49_38_51	NP_001015880-AN1-2-chr10-89469070-89472973-stop573-whim12
SPATA20		-0.959					-0.996	-0.922							SPATA20	SPATA20	SPATA20	SPATA20	NP_073738-AN1-8-chr17_332_343_355	NP_073738-AN1-8-chr17-48627476-48627590-stop796-whim30
TPI1		0.3095									0.342	0.277			TPI1	TPI1	TPI1	TPI1	NP_001152759-AN1-5-chr12_219_213_223	NP_001152759-AN1-5-chr12-6978937-6979218-stop261-whim12
MAPK11		-0.2605									-0.069	-0.452			MAPK11	MAPK11	MAPK11	MAPK11	NP_002742-A-9-11_84_118_125	NP_002742-A-9-11-chr22-50705911-50706248-59-stop143-whim12
ZNF589		NaN													ZNF589	ZNF589	ZNF589	ZNF589	NP_057173-AN1-2-chr3_33_29_37	NP_057173-AN1-2-chr3-48289167-48309407-stop121-whim2
TRIP4		-0.097									-0.168	-0.026			TRIP4	TRIP4	TRIP4	TRIP4	NP_057297-AN1-6-chr15_276_269_277	NP_057297-AN1-6-chr15-64698658-64701978-stop291-whim30
ALS2		NaN													ALS2	ALS2	ALS2	ALS2	NP_065970-AN2-10-chr2_1335_1317_1335	NP_065970-AN2-10-chr2-202579902-202580394-stop1399-whim2
APRT		NaN													APRT	APRT	APRT	APRT	NP_001025189-AN2-4-chr16_64_52_68	NP_001025189-AN2-4-chr16-88877770-88877957-stop78-whim6
DNAJC10		0.264									0.168	0.36			DNAJC10	DNAJC10	DNAJC10	DNAJC10	NP_061854-AN1-19-chr2_716_717_728	NP_061854-AN1-19-chr2-183624034-183627378-stop787-whim2
HNRNPU		0.231									0.246	0.216			HNRNPU	HNRNPU	HNRNPU	HNRNPU	NP_114032-AN2-3-chr1_785_847_857	NP_114032-AN2-3-chr1-245018389-245018725-stop866-whim12
CEP290		0.123					0.453	-0.207							CEP290	CEP290	CEP290	CEP290	NP_079390-A-7-9_2120_2114_2124	NP_079390-A-7-9-chr12-88453797-88456468-165-whim30
TLN1		-0.0865							-0.198	0.025					TLN1	TLN1	TLN1	TLN1	NP_006280-A-25-27_1372_1369_1385	NP_006280-A-25-27-chr9-35710680-35710985-90-variant-whim12
TMEM184A		NaN													TMEM184A	TMEM184A	TMEM184A	TMEM184A	NP_001091089-AN2-5-chr7_185_253_271	NP_001091089-AN2-5-chr7-1589522-1589758-stop403-whim2
IFI44		NaN													IFI44	IFI44	IFI44	IFI44	NP_006408-AN1-5-chr1_338_377_398	NP_006408-AN1-5-chr1-79125168-79128392-stop413-whim30
REEP6		NaN													REEP6	REEP6	REEP6	REEP6	NP_612402-AN1-3-chr19_117_142_162	NP_612402-AN1-3-chr19-1495606-1496315-stop179-whim30
NOL8		NaN													NOL8	NOL8	NOL8	NOL8	NP_060418-A-9-14_95_89_99	NP_060418-A-9-14-chr9-95072957-95083949-2191-stop156-whim2
MRS2		0.748							0.816	0.68					MRS2	MRS2	MRS2	MRS2	NP_065713-AN1-5-chr6_197_226_235	NP_065713-AN1-5-chr6-24412623-24415275-stop244-whim2
FANCA		0.1475							0.247	0.048					FANCA	FANCA	FANCA	FANCA	NP_000126-AN2-24-chr16_610_610_629	NP_000126-AN2-24-chr16-89842219-89845208-stop638-whim2
SYNCRIP		NaN													SYNCRIP	SYNCRIP	SYNCRIP	SYNCRIP	NP_006363-A-5-8_126_124_132	NP_006363-A-5-8-chr6-86333830-86349938-291-variant-whim4
